# Supplementary material
Source: PubMed Central journal article supplement (PMC7609658)
Supplement: NIHMS1616865-supplement-Hoveyda-Zhou_Supplementary.pdf [file NIHMS1616865-supplement-Hoveyda-Zhou_Supplementary.pdf]

## SUPPORTING INFORMATION

### Table of Contents

|          |                                                                                                                                                                             |          |
|----------|-----------------------------------------------------------------------------------------------------------------------------------------------------------------------------|----------|
| <b>1</b> | <b>General</b> .....                                                                                                                                                        | <b>4</b> |
| <b>2</b> | <b>Reagents</b> .....                                                                                                                                                       | <b>4</b> |
| <b>3</b> | <b>Sulfonate N-Heterocyclic Carbenes</b> .....                                                                                                                              | <b>5</b> |
| 3.1      | <i>iso</i> -Butyl-2-((1 <i>S</i> ,2 <i>S</i> )-2-amino-1,2-diphenylethylamino)benzenesulfonate ( <b>S1</b> ) .....                                                          | 5        |
| 3.2      | <i>iso</i> -Butyl-2-((1 <i>S</i> ,2 <i>S</i> )-2-(mesitylamino)-1,2-diphenylethylamino)benzenesulfonate ( <b>1a</b> ).....                                                  | 6        |
| 3.3      | <b>Imid(S)-1a</b> .....                                                                                                                                                     | 6        |
| 3.4      | Complex <b>NHC(S)-Ag-1a</b> .....                                                                                                                                           | 7        |
| 3.5      | 3,5-Bis(2,4,6-tri- <i>iso</i> -propylbenzene)-((1 <i>S</i> ,2 <i>S</i> )-2-amino-1,2-diphenylethylamino) benzene ( <b>S2</b> ) .....                                        | 8        |
| 3.6      | 3,5-Bis(2,4,6-tri- <i>iso</i> -propylbenzene)-((1 <i>S</i> ,2 <i>S</i> )-2-((2- <i>iso</i> -butylsulfonyl)benzene)-amino-1,2-diphenylethylamino)benzene ( <b>S3</b> ) ..... | 8        |
| <b>4</b> | <b>EAS of Bis[(pinacolato)boryl]methane to Trisubstituted Allylic Phosphates (Scheme 22a)</b> .....                                                                         | <b>9</b> |
| 4.1      | Representative Procedure.....                                                                                                                                               | 9        |
| 4.2      | Methyl-( <i>R</i> )-3-(4-bromophenyl)-2-methylene-4-(4,4,5,5-tetramethyl-1,3,2-dioxaborolan-2-yl) butanoate .....                                                           | 10       |
| 4.3      | Methyl-( <i>R</i> )-2-methylene-3-phenyl-4-(4,4,5,5-tetramethyl-1,3,2-dioxaborolan-2-yl) butanoate.....                                                                     | 10       |

|          |                                                                                                                                                                                        |           |
|----------|----------------------------------------------------------------------------------------------------------------------------------------------------------------------------------------|-----------|
| 4.4      | Methyl-( <i>R</i> )-3-cyclohexyl-2-methylene-4-(4,4,5,5-tetramethyl-1,3,2-dioxaborolan-2-yl) butanoate .....                                                                           | 11        |
| 4.5      | Methyl-( <i>R</i> )-2-methylene-5-phenyl-3-((4,4,5,5-tetramethyl-1,3,2-dioxaborolan-2-yl)methyl) pentanoate .....                                                                      | 12        |
| <b>5</b> | <b>EAS of Bis[(pinacolato)boryl]methane to <i>Z</i>-Trisubstituted Allylic Phosphates (Scheme 22b)...</b>                                                                              | <b>12</b> |
| 5.1      | Representative Procedure.....                                                                                                                                                          | 12        |
| 5.2      | ( <i>S</i> )-2-Methyl-2-phenylbut-3-en-1-ol.....                                                                                                                                       | 13        |
| 5.2.1    | Determination of stereochemical identity .....                                                                                                                                         | 13        |
| 5.3      | ( <i>S</i> )-2-(2-Methoxyphenyl)-2-methylbut-3-en-1-ol.....                                                                                                                            | 14        |
| 5.4      | ( <i>R</i> )-2-((( <i>tert</i> -Butyldimethylsilyloxy)methyl)-2-methylbut-3-en-1-ol.....                                                                                               | 14        |
| <b>6</b> | <b>ECA of Alkenyl-Al Compounds to Cyclic Enones (Schemes 49-50) .....</b>                                                                                                              | <b>15</b> |
| 6.1      | Representative Procedure.....                                                                                                                                                          | 15        |
| 6.2      | ( <i>R</i> )-3-Methyl-3-(oct-1-en-2-yl)cyclopentanone.....                                                                                                                             | 15        |
| 6.3      | ( <i>R</i> )-3-Methyl-3-(oct-1-en-2-yl)cyclohexanone.....                                                                                                                              | 16        |
| 6.4      | ( <i>S</i> )-3-Methyl-3-(1-phenylvinyl)cyclopentanone.....                                                                                                                             | 17        |
| 6.5      | ( <i>S</i> )-3-Methyl-3-(1-phenylvinyl)cyclohexanone.....                                                                                                                              | 17        |
| 6.5.1    | Determination of Stereochemical Identity .....                                                                                                                                         | 18        |
| <b>7</b> | <b>Kinetic Isotope Effect Experiments.....</b>                                                                                                                                         | <b>18</b> |
| 7.1      | ( <i>E</i> )-Methyl (5-phenylpent-2-en-1-yl-1,1- <i>d</i> <sub>2</sub> ) carbonate.....                                                                                                | 18        |
| 7.2      | Competition experiment between <b>S4</b> and <b>S4-<i>d</i><sub>2</sub></b> and determination of the secondary kinetic isotope effect (SKIE) for C–O bond cleavage at C $\alpha$ ..... | 18        |
| 7.3      | ( <i>E</i> )-Diethyl (5-phenylpent-2-en-1-yl-1,1- <i>d</i> <sub>2</sub> ) phosphate.....                                                                                               | 19        |
| 7.4      | Competition experiment between <b>S6</b> and <b>S6-<i>d</i><sub>2</sub></b> and determination of the secondary kinetic isotope effect (SKIE) for C–O bond cleavage at C $\alpha$ ..... | 19        |
| <b>8</b> | <b>Absolute Stereochemistry of Enantioselective Boryl Substitution Products .....</b>                                                                                                  | <b>20</b> |
| 8.1      | ( <i>R</i> )-5-Phenylpent-1-en-3-yl ( <i>S</i> )-3,3,3-trifluoro-2-methoxy-2-phenylpropanoate ( <b>S-S8</b> ).....                                                                     | 20        |
| 8.2      | ( <i>R</i> )-5-Phenylpent-1-en-3-yl ( <i>R</i> )-3,3,3-trifluoro-2-methoxy-2-phenylpropanoate ( <b>R-S8</b> ).....                                                                     | 20        |
| <b>9</b> | <b>Catalytic Enantioselective Silyl Substitution .....</b>                                                                                                                             | <b>21</b> |
| 9.1      | Representative Procedure.....                                                                                                                                                          | 21        |
| 9.2      | ( <i>S</i> )-Dimethyl(phenyl)(1-phenylallyl)silane .....                                                                                                                               | 22        |
| 9.2.1    | Determination of stereochemical identity .....                                                                                                                                         | 22        |
| 9.3      | ( <i>S</i> )-(1-(2-Methoxyphenyl)allyl)dimethyl(phenyl)silane.....                                                                                                                     | 22        |
| 9.4      | ( <i>S</i> )-(1-(2-Bromophenyl)allyl)dimethyl(phenyl)silane <sup>14</sup> .....                                                                                                        | 23        |
| 9.5      | ( <i>S</i> )-Dimethyl(phenyl)(1-(4-(trifluoromethyl)phenyl)allyl)silane <sup>13</sup> .....                                                                                            | 24        |

|           |                                                                                                      |            |
|-----------|------------------------------------------------------------------------------------------------------|------------|
| 9.6       | ( <i>S</i> )-3-(1-(Dimethyl(phenyl)silyl)allyl)pyridine (mixture with S <sub>N</sub> 2 product)..... | 24         |
| 9.7       | ( <i>R</i> )-Dimethyl(oct-1-en-3-yl)(phenyl)silane.....                                              | 25         |
| <b>10</b> | <b>Carboxylate NHC–Metal Complex .....</b>                                                           | <b>26</b>  |
| 1.1       | Imidazolium salt <b>S10</b> .....                                                                    | 26         |
| 10.1      | Carboxylate imidazolium salt <b>NHC(C)-1</b> .....                                                   | 27         |
| 10.2      | Complex <b>NHC(C)-Ag-1</b> .....                                                                     | 27         |
| <b>11</b> | <b>Density Functional Theory (DFT) Calculations.....</b>                                             | <b>28</b>  |
| 11.1      | Computational Details .....                                                                          | 28         |
| 11.2      | General Features.....                                                                                | 28         |
| 11.3      | Stereochemical Models.....                                                                           | 29         |
| 11.3.1    | Stereochemical models for EAS .....                                                                  | 29         |
| 11.3.2    | Stereochemical models for ECA.....                                                                   | 34         |
| 11.3.3    | Stereochemical models for proto-boryl addition.....                                                  | 37         |
| 11.3.4    | Stereochemical models for boryl substitution.....                                                    | 38         |
| 11.3.5    | Stereochemical models for silyl substitution .....                                                   | 40         |
| 11.3.6    | Comparison of migratory insertion versus $\pi$ -allyl formation.....                                 | 40         |
| 11.4      | Steric Maps .....                                                                                    | 42         |
| <b>12</b> | <b>Coordinates After Optimization with M06L/Def2SVP<sub>CH2Cl2</sub>(SMD) .....</b>                  | <b>45</b>  |
| <b>13</b> | <b>NMR Spectra .....</b>                                                                             | <b>166</b> |
| <b>14</b> | <b>References .....</b>                                                                              | <b>198</b> |

## 1 General

Infrared (IR) spectra were recorded on a Bruker FT-IR Alpha (ATR mode) spectrophotometer,  $\lambda_{\max}$  in  $\text{cm}^{-1}$ . Bands are characterized as broad (br), strong (s), medium (m), and weak (w).  $^1\text{H}$  NMR spectra were recorded on a Varian Unity INOVA 400 (400 MHz), Varian Unity INOVA 500 (500 MHz) or Varian Unity INOVA 600 (600 MHz) spectrometer. Chemical shifts are reported in ppm from tetramethylsilane with the solvent resonance as the internal standard ( $\text{CDCl}_3$ :  $\delta$  7.26 ppm). Data are reported as follows: chemical shift, integration, multiplicity (s = singlet, d = doublet, t = triplet, q = quartet, sep = septet, bs = broad singlet, m = multiplet), and coupling constants (Hz).  $^{13}\text{C}$  NMR spectra were recorded on a Varian Unity INOVA 400 (100 MHz), Varian Unity INOVA 500 (125 MHz) or or Varian Unity INOVA 600 (150 MHz) spectrometer with complete proton decoupling. Chemical shifts are reported in ppm from tetramethylsilane with the solvent resonance as the internal standard ( $\text{CDCl}_3$ :  $\delta$  77.16 ppm). High-resolution mass spectrometry was performed on a JEOL AccuTOF DART (positive mode), or ESI (positive mode) at the Mass Spectrometry Facility at Boston College. Enantiomer ratios were determined by GC (Alltech Associated Chiraldex BDM (30 m x 0.25 mm), Chiraldex G-TA (30 m x 0.25 mm),  $\beta$ -dex 120 (30 m x 0.25 mm), Chiraldex MDM (30 m x 0.25 mm)) or HPLC analysis (Chiral Technologies Chiralpak AZ-H (4.6 x 250 mm), Chiralcel OD-H (4.6 x 250 mm), Chiralpak AD-H (4.6 x 250 mm), Chiralcel OJ-H (4.6 x 250 mm), Chiralcel OZ-H (4.6 x 250 mm) and Chiralcel OZ-3 (4.6 x 150 mm)) in comparison with authentic racemic materials. Specific rotations were measured on an ATAGO<sup>®</sup> AP-300 Automatic Polarimeter or a Rudolph Research Analytical Autopol IV Polarimeter. Unless otherwise noted, all reactions were carried out with distilled and degassed solvents under an atmosphere of dry  $\text{N}_2$  in oven- (135 °C) or flame-dried glassware with standard dry box or vacuum-line techniques. Solvents were purified under a positive pressure of dry argon by a modified Innovative Technologies purification system: toluene, benzene and hexanes were purified through a copper oxide and alumina column;  $\text{CH}_2\text{Cl}_2$  and  $\text{Et}_2\text{O}$  were purged with Ar and purified by passage through two alumina columns. Tetrahydrofuran (Fisher Scientific, Inc.) was purified by distillation from sodium benzophenone ketyl immediately prior to use unless otherwise specified. All work-up and purification procedures were carried out in air.

## 2 Reagents

**Acetic acid** was purchased from Fisher and used as received.

**Allylic phosphates** were prepared according to previously reported methods.<sup>1</sup>

**Ammonium tetrafluoroborate** was purchased from Strem Inc. and used as received.

**Racemic-2,2'-bis(diphenylphosphino)-1,1'-binaphthyl** (*rac*-binap) was purchased from Aldrich and used as received.

**Bis[(pinacolato)boryl]methane** was prepared according to previously reported methods.<sup>2</sup>

**Diisobutyl(oct-1-en-2-yl)aluminum** was prepared according to previously reported methods.<sup>3</sup>

**(Dimethylphenylsilyl)boronic acid pinacol ester [PhMe<sub>2</sub>Si-B(pin)]** was purchased from Aldrich and distilled prior to use.

**(-)-(S,S)-Diphenylethylenediamine** was purchased from Astatech Inc. and used as received.

**1,4-Dioxane** (99%, anhydrous) was purchased from Aldrich and used as received.

**Formaldehyde** (37% aqueous solution) was purchased from Aldrich and used as received.

***N*-Methyl-*N*-methyldiimineium iodide (Eschenmoser's salt)** was purchased from Aldrich and used as received.

**Palladium (II) acetate** was purchased from Aldrich and used as received.

**Triethyl orthoformate** was purchased from Aldrich and distilled from Na prior to used.

**Trifluoroacetic acid** was purchased from Oakwood Inc. and used as received.

**Tris(dibenzylideneacetone)dipalladium(0)** was purchased from Strem Inc. and used as received.

**Silver (I) oxide** was prepared by previously reported methods.<sup>4</sup>

**Sodium methoxide** was purchased from Strem Inc. and used as received.

**Sodium perborate tetrahydrate** was purchased from Aldrich and used as received.

NOTE: It is imperative that Cu and imidazolium salts are rigorously dried in order to achieve optimal efficiency and enantioselectivity.

### 3 Sulfonate *N*-Heterocyclic Carbenes<sup>5</sup>



#### 3.1 *iso*-Butyl-2-((1*S*,2*S*)-2-amino-1,2-diphenylethylamino)benzenesulfonate (S1)

In a glove box, an oven-dried 250 mL round bottom flask was charged with (–)-(*S,S*)-diphenylethylenediamine (1.00 g, 4.71 mmol), Pd<sub>2</sub>(dba)<sub>3</sub> (258 mg, 0.283 mmol), *rac*-binap (528 mg, 0.848 mmol) and NaOt-Bu (815 mg, 8.48 mmol). The flask was removed from the glove box and fitted with a reflux condenser. A solution of *iso*-butyl-2-bromobenzenesulfonate<sup>5a</sup> (1.38 g, 4.71 mmol) in thf (47 mL) was added through syringe and the mixture was allowed to stir at 75 °C (the solution turned dark-red upon heating and remained as such for the duration). After 15 h, the mixture was allowed to cool to 22 °C and the volatiles were removed in vacuo, affording deep red oil. This was dissolved in toluene and purified by silica gel chromatography (100% hexanes (to elute toluene) to 50% Et<sub>2</sub>O/hexanes) to afford 1.50 g (3.53

mmol, 75% yield) of **S1** as yellow solid. **Mp**: 157–159 °C; **IR (neat)**: 3364 (br), 2966 (w), 2874 (w), 1601 (m), 1504 (m), 1461 (m), 1167 (m), 978 (m)  $\text{cm}^{-1}$ ;  **$^1\text{H NMR (CDCl}_3, 400 \text{ MHz)}$** :  $\delta$  7.67 (1H, dd,  $J = 8.1, 1.7$  Hz), 7.49 (2H, d,  $J = 8.1$  Hz), 7.44 (1H, d,  $J = 7.0$  Hz) 7.35–7.22 (8H, m), 7.13 (1H, dd,  $J = 8.1, 7.2$  Hz), 6.57 (1H, dd,  $J = 8.1, 7.2$  Hz), 6.31 (1H, d,  $J = 8.1$  Hz), 4.59 (1H, dd,  $J = 7.0, 3.5$  Hz), 4.40 (1H, d,  $J = 3.5$  Hz), 3.74 (1H, dd,  $J = 9.3, 6.8$  Hz), 3.70 (1H, dd,  $J = 9.3, 6.6$  Hz), 1.95 (1H, ddqq,  $J = 6.8, 6.8, 6.8, 6.6$  Hz), 1.51 (2H, br), 0.92 (3H, d,  $J = 6.8$  Hz), 0.85 (3H, d,  $J = 6.8$  Hz);  **$^{13}\text{C NMR (CDCl}_3, 100 \text{ MHz)}$** :  $\delta$  145.8, 142.6, 140.7, 135.1, 130.8, 128.8, 128.4, 127.6, 127.6, 127.1, 126.8, 116.5, 115.1, 113.6, 76.3, 63.0, 61.2, 28.1, 18.8, 18.7; **HRMS (EI+)**: Calcd for  $\text{C}_{24}\text{H}_{29}\text{N}_2\text{O}_3\text{S}$ : 425.1899 ( $\text{M}^+\text{+H}$ ); found: 425.1895. Specific rotation:  $[\alpha]_{\text{D}}^{25} -98.9$  ( $c$  1.00,  $\text{CHCl}_3$ ).

### 3.2 *iso*-Butyl-2-((1*S*,2*S*)-2-(mesitylamino)-1,2-diphenylethylamino)benzenesulfonate (**1a**)

In a glove box, an oven-dried 50 mL round bottom flask was charged with **S1** (0.800 g, 1.88 mmol),  $\text{Pd(OAc)}_2$  (42.0 mg, 0.188 mmol), *rac*-binap (234 mg, 0.376 mmol) and  $\text{NaOt-Bu}$  (272 mg, 2.83 mmol). The flask was removed from the glove box and attached to a reflux condenser. A solution of 2-bromomesitylene (577  $\mu\text{L}$ , 3.77 mmol) dissolved in toluene (19 mL) was added by syringe and the mixture was allowed to stir at 110 °C (the mixture turned dark-red upon heating and remained so afterwards). After 18 h, the mixture was allowed to cool to 22 °C, loaded on silica gel and purified by silica gel chromatography (100% petroleum ether (for eluting toluene) to 20%  $\text{Et}_2\text{O}$ /petroleum ether) to afford pale yellow solid, which was rinsed with petroleum ether to give 441 mg (0.811 mmol, 43% yield) of diamine **1a** as white solid. **Mp**: 164–166 °C; **IR (neat)**: 3352 (m), 2962 (m), 2917 (w), 2861 (w), 1596 (s), 1350 (s)  $\text{cm}^{-1}$ ;  **$^1\text{H NMR (CDCl}_3, 400 \text{ MHz)}$** :  $\delta$  7.82 (1H, dd,  $J = 8.1, 1.7$  Hz), 7.42 (1H, d,  $J = 4.5$  Hz), 7.30–7.12 (9H, m), 7.07–7.04 (2H, m), 6.75–6.72 (3H, m), 6.57 (1H, d,  $J = 8.4$  Hz), 4.97 (1H, dd,  $J = 7.0, 4.5$  Hz), 4.57 (1H, d,  $J = 7.0$  Hz), 3.88 (1H, dd,  $J = 9.3, 6.6$  Hz), 3.78 (1H, dd,  $J = 9.3, 6.4$  Hz), 3.65 (1H, br s), 2.20 (3H, s), 2.15 (6H, s), 2.01 (1H, ddqq,  $J = 6.6, 6.4, 4.2, 4.0$  Hz), 0.99 (3H, d,  $J = 4.0$  Hz), 0.97 (3H, d,  $J = 4.2$  Hz);  **$^{13}\text{C NMR (CDCl}_3, 100 \text{ MHz)}$** :  $\delta$  145.7, 140.9, 140.2, 140.1, 135.1, 131.1, 130.9, 129.8, 129.2, 128.4, 128.2, 128.1, 127.8, 127.6, 117.6, 115.8, 113.9, 76.2, 66.7, 62.0, 28.2, 20.5, 19.2, 18.8; **HRMS (EI+)**: Calcd for  $\text{C}_{33}\text{H}_{39}\text{N}_2\text{O}_3\text{S}$ : 543.2681 ( $\text{M}^+\text{+1}$ ); found: 543.2680. Specific rotation:  $[\alpha]_{\text{D}}^{25} -94.4$  ( $c$  0.100,  $\text{CHCl}_3$ ).

### 3.3 Imid(S)-1a

An oven-dried 2-dram vial was charged with diamine **1a** (1.56 g, 2.87 mmol) and Eschenmoser's salt (2.60 g, 14.3 mmol). The vial was sealed (septum) and purged with  $\text{N}_2$ , after which acetic acid (2.48 mL, 43.0 mmol) was added by syringe. The vial was sealed (screw cap) and the solution was allowed to stir at 110 °C (the heterogeneous mixture turned yellow and then black/homogeneous upon heating). After 2 h, the mixture was allowed to cool to 22 °C and transferred into an Erlenmeyer flask, and was diluted with  $\text{Et}_2\text{O}$  (5 mL) and water (5 mL). The solution was neutralized by *slow* addition of an aqueous solution of saturated  $\text{K}_2\text{CO}_3$  until gas evolution ceased. Dichloromethane (10 mL) was added and the aqueous layer was separated. The aqueous layer was washed with  $\text{CH}_2\text{Cl}_2$  ( $2 \times 10$  mL) and the combined organic layers were dried over  $\text{Na}_2\text{SO}_4$ , filtered and concentrated in vacuo to afford yellow solid, which was purified by silica gel chromatography (100%  $\text{CH}_2\text{Cl}_2$  to 0.5%  $\text{MeOH/CH}_2\text{Cl}_2$  to 1.0%  $\text{MeOH/CH}_2\text{Cl}_2$ ) to afford 1.12 g (2.26 mmol, 79% yield) of **imid(S)-1a** as white solid. (Note: Separation of a yellow impurity by silica gel chromatography can often be tedious. Note: After silica gel chromatography, precipitation of **imid(S)-1a**

from a CH<sub>2</sub>Cl<sub>2</sub> solution with hexenes leads to removal of trace quantities of the impurity; crystalline material was then secured by recrystallization from CH<sub>2</sub>Cl<sub>2</sub>:Et<sub>2</sub>O. **Mp**: 223–225 °C; **IR (neat)**: 3058 (m), 2914 (m), 2861 (w), 1623 (s), 1579 (m), 1230 (s) cm<sup>-1</sup>; **<sup>1</sup>H NMR (CDCl<sub>3</sub>, 400 MHz)**: δ 8.72 (1H, s), 8.23 (1H, dd, *J* = 7.9, 1.5 Hz), 7.67–7.64 (2H, m, ArH), 7.50–7.47 (2H, m), 7.43–7.41 (3H, m), 7.36–7.30 (4H, m), 7.10 (1H, td, *J* = 7.9, 1.5 Hz), 6.93 (1H, s), 6.73 (1H, s), 6.72 (1H, dd, *J* = 7.9, 1.5 Hz), 6.56 (1H, d, *J* = 11.8 Hz), 5.53 (1H, d, *J* = 11.8 Hz), 2.60 (3H, s), 2.23 (3H, s), 2.00 (3H, s); **<sup>13</sup>C NMR (CDCl<sub>3</sub>, 100 MHz)**: δ 158.7, 144.0, 140.4, 138.6, 135.0, 134.3, 131.5, 130.7, 130.5, 130.5, 130.3, 130.0, 129.9, 129.7, 129.6, 129.1, 129.1, 127.5, 76.2, 74.5, 21.0, 18.8, 18.5; **HRMS (EI<sup>+</sup>)**: Calcd for C<sub>30</sub>H<sub>29</sub>N<sub>2</sub>O<sub>3</sub>S: 497.1899 (M<sup>+</sup>+H), Found 497.1886; **Elemental Analysis**: Anal Calcd for C<sub>30</sub>H<sub>28</sub>N<sub>2</sub>O<sub>3</sub>S: C 72.55; H 5.68; N 5.64; found C 72.27; H 5.41; N 5.45. Specific Rotation: [α]<sub>D</sub><sup>25</sup> –14.9 (*c* 0.50, CHCl<sub>3</sub>).

### 3.4 Complex NHC(S)-Ag-1a

An oven-dried 10 mL round bottom flask was charged with **imid(S)-1a** (100 mg, 0.201 mmol), Ag<sub>2</sub>O (93.0 mg, 0.400 mmol), and oven-dried powdered <5 micron 4Å MS (~ 50 mg). The flask was purged with N<sub>2</sub>, fitted with a reflux condenser, and covered with aluminum foil. Tetrahydrofuran (1.0 mL) and benzene (1.0 mL) were added by syringe, resulting in a heterogeneous black mixture, which was allowed to stir at 80 °C for 1 h. The mixture was allowed to cool to 22 °C and passed through a short plug of celite (4 x 1 cm) eluted with thf (ca. 20 mL). The volatiles were removed in vacuo, affording 119 mg (0.197 mmol, 98% yield) of **NHC(S)-Ag-1a** as white solid (stored in the dark). Further purification was carried out by recrystallization (CH<sub>2</sub>Cl<sub>2</sub>:Et<sub>2</sub>O). **Mp**: 247–249 °C (decomp.); **IR (neat)**: 3062 (w), 3026 (w), 2908 (w), 1608 (w), 1480 (s), 1455 (s), 1226 (s), 1201 (s), 1027 (m), 754 (s) cm<sup>-1</sup>; **<sup>1</sup>H NMR (CDCl<sub>3</sub>, 400 MHz)**: δ 8.27 (1H, br d, *J* = 7.3 Hz), 7.50–7.44 (2H, m), 7.32–6.95 (9H, m), 6.80 (2H, br s), 6.55 (1H, br d, *J* = 10.4 Hz), 6.33 (2H, br s), 5.18 (1H, br d, *J* = 10.4 Hz), 2.46 (3H, s), 2.29 (3H, s), 1.42 (3H, s); **<sup>13</sup>C NMR (CDCl<sub>3</sub>, 100 MHz)**: δ 205.6 (*J*<sub>C<sup>109</sup>Ag</sub> = 186.8 Hz, *J*<sub>C<sup>107</sup>Ag</sub> = 182.5 Hz), 143.4, 138.6, 138.5, 136.5, 135.7, 135.2, 134.1, 131.1, 130.6, 130.0, 129.9, 129.6, 128.9, 128.8, 128.6, 128.5, 128.4, 128.2, 76.5, 74.0, 68.6, 21.1, 19.0, 17.9. Specific rotation: [α]<sub>D</sub><sup>25</sup> –104 (*c* 0.50, CHCl<sub>3</sub>).



### 3.5 3,5-Bis(2,4,6-tri-*iso*-propylbenzene)-((1*S*,2*S*)-2-amino-1,2-diphenylethylamino) benzene (S2)

In a glove box, a flame-dried 100 mL round-bottom flask was charged with 5'-bromo-2,2'',4,4'',6,6''-hexaisopropyl-1,1':3',1''-terphenyl<sup>6</sup> (4.24 g, 7.55 mmol), (–)-(*S,S*)-diphenylethylenediamine (2.41 g, 11.3 mmol), Pd<sub>2</sub>(dba)<sub>3</sub> (415 mg, 0.453 mmol), *rac*-binap (846 mg, 1.36 mmol) and NaO*t*-Bu (1.31 g, 13.6 mmol). Tetrahydrofuran (20 mL) was added, and, after being fitted with a reflux condenser, the flask was removed from the glove box. The mixture was allowed to stir for 18 h at 80 °C, after which it was allowed to cool to 22 °C. The volatiles were removed in vacuo, and the resulting red oil was purified by silica gel chromatography (1:5 EtOAc:hexanes, R<sub>f</sub> = 0.2) to afford 4.61 g (6.64 mmol, 88% yield) of **S2** as pale yellow solid. **Mp**: 86–88 °C. **IR (neat)**: 2960 (s), 2929 (m), 2868 (m), 1590 (s), 1493 (m), 1459 (s), 1433 (m), 1382 (m), 1361 (m), 1315 (w), 1265 (w), 1216 (s), 1110 (s), 1071 (w), 1028 (w), 993 (w), 908 (s), 877 (w), 853 (w), 753 (s), 731 (s), 698 (s), 666 (m), 649 (m) cm<sup>-1</sup>; **<sup>1</sup>H NMR (CDCl<sub>3</sub>, 400 MHz)**: δ 7.34–7.26 (4H, m), 7.24–7.18 (6H, m), 6.95 (2H, d, *J* = 1.2 Hz), 6.92 (2H, s), 6.27 (2H, s), 6.19 (1H, s), 4.97 (1H, d, *J* = 7.6 Hz), 4.59 (1H, dd, *J* = 7.6, 4.0 Hz), 4.34 (1H, d, *J* = 3.2 Hz), 2.86 (2H, q, *J* = 6.8 Hz), 2.71 (2H, q, *J* = 6.8 Hz), 2.55 (2H, q, *J* = 6.8 Hz), 1.38 (2H, d, *J* = 2.8 Hz), 1.24 (12H, d, *J* = 6.8 Hz), 1.10 (6H, d, *J* = 6.8 Hz), 0.99 (6H, d, *J* = 6.8 Hz), 0.89 (12H, dd, *J* = 11.2, 6.8 Hz); **<sup>13</sup>C NMR (CDCl<sub>3</sub>, 100 MHz)**: δ 147.4, 147.1, 146.6, 146.5, 142.9, 141.3, 141.0, 137.6, 128.4, 128.3, 127.5, 127.4, 127.2, 127.1, 121.3, 120.4, 120.3, 114.2, 77.4, 63.8, 60.9, 34.4, 30.3, 30.2, 24.6, 24.5, 24.3, 24.2, 24.1; **MS (TOF MS ES+)**: Calcd for C<sub>50</sub>H<sub>74</sub>N<sub>2</sub>O<sub>5</sub> [M+5H<sub>2</sub>O]<sup>+</sup>: 782.5; found: 782.3. Specific rotation: [α]<sub>D</sub><sup>23.8</sup> –52.4 (*c* 0.93, CHCl<sub>3</sub>).

### 3.6 3,5-Bis(2,4,6-tri-*iso*-propylbenzene)-((1*S*,2*S*)-2-((2-*iso*-butylsulfonyl)benzene)-amino-1,2-diphenylethylamino)benzene (S3)

In a glove box, a flame-dried 100 mL round-bottom flask was charged with diamine **S2** (5.14 g, 7.42 mmol), isobutyl-2-bromobenzenesulfonate (3.96 g, 13.5 mmol), Pd<sub>2</sub>(dba)<sub>3</sub> (407 mg, 0.445 mmol), *rac*-binap (739 mg, 1.19 mmol), and NaO*t*-Bu (1.43 g, 14.8 mmol), and toluene (40 mL) was added. The flask was fitted with a reflux condenser and removed from the glove box, after which the mixture was allowed to stir for 12 h at reflux (110 °C). The solution was allowed to cool to 22 °C and loaded onto a silica gel column. Chromatographic purification of the resulting red oil (1:9 Et<sub>2</sub>O:hexanes, R<sub>f</sub> = 0.18) afforded 5.31 g (5.86 mmol, 79% yield) of **S3** as pale yellow solid. **Mp**: 98–100 °C. **IR (neat)**: 3388 (br), 2960 (s), 2929 (m), 2868 (m), 1702 (s), 1590 (s), 1513 (s), 1467 (m), 1430 (m), 1351 (w), 1315 (w), 1266 (s), 1241 (s), 1216 (s), 1173 (w), 1162 (w), 1104 (w), 1071 (w), 1029 (m), 976 (m), 943 (m), 908 (m), 877 (m), 846 (m), 815 (m), 752 (s), 731 (s), 700 (s), 667 (m), 649 (m), 592 (s), 526 (m) cm<sup>-1</sup>; **<sup>1</sup>H NMR (CDCl<sub>3</sub>, 400 MHz)**: δ 7.69 (1H, dd, *J* = 8.0, 1.6 Hz), 7.27–7.20 (5H, m), 7.17 (1H, t, *J* = 7.8 Hz), 7.06 (2H, dd, *J* = 7.8, 1.2 Hz), 7.00–6.95 (7H, m), 6.63 (1H, t, *J* = 8.0 Hz), 6.58 (1H, d, *J* = 6.0 Hz), 6.43 (2H, d, *J* = 1.2 Hz), 6.37 (1H, s), 4.94 (2H, dt, *J* = 5.6, 5.2 Hz), 4.25 (1H, d, *J* = 8.4 Hz), 3.69 (2H, d, *J* = 6.0 Hz), 2.89 (2H, q, *J* = 7.2 Hz), 2.76 (2H, q, *J* = 7.2 Hz), 2.66 (2H, q, *J* = 7.2 Hz), 1.85–1.81 (1H, m), 1.27 (12H, d, *J* = 7.2 Hz), 1.10 (6H, d, *J* = 7.2 Hz), 1.01 (12H, dd, *J* = 6.8, 2.8 Hz), 0.98 (6H, d, *J* = 7.2 Hz), 0.81 (6H, dd, *J* = 6.8, 6.4 Hz); **<sup>13</sup>C NMR (CDCl<sub>3</sub>, 100 MHz)**: δ 147.4, 146.5, 146.4, 145.7, 145.4, 141.6, 138.1, 137.6, 137.3, 135.2, 130.8, 128.4, 128.3, 128.2, 128.1, 127.9, 122.5, 120.45, 120.40, 117.5, 116.1, 114.8, 113.8, 77.4, 76.3, 62.4, 60.7, 34.4, 30.4, 30.3, 28.1, 24.5, 24.4, 24.23, 24.20, 24.1, 18.75, 18.73; **HRMS (MALDI-TOF)**: Calcd for C<sub>60</sub>H<sub>77</sub>N<sub>2</sub>O<sub>3</sub>S [M+H]<sup>+</sup>: 905.5655; found: 905.5617. Specific rotation: [α]<sub>D</sub><sup>23.5</sup> –113.2 (*c* 1.00, CHCl<sub>3</sub>).

**imid(S)-3a:**<sup>7</sup> Diamine **S3** (1.52 g, 1.68 mmol) and Eschenmoser's salt (1.55 g, 8.39 mmol) were weighed out into a screw cap vial, which was sealed with a septum and purged with N<sub>2</sub>. Acetic acid (10.0 mL) was added to the mixture, which was allowed to stir vigorously for 30 min at 22 °C (preliminary stirring at 22 °C is needed for high yield and reproducibility) before it was allowed to heat to 110 °C (the mixture becomes an orange homogeneous solution). After 1 h, the mixture was allowed to cool to 22 °C and diluted with Et<sub>2</sub>O (10 mL) and water (10 mL). The solution was neutralized by the *slow* addition of a saturated solution of aqueous K<sub>2</sub>CO<sub>3</sub> until gas evolution ceased. The aqueous layer was washed with CH<sub>2</sub>Cl<sub>2</sub> (4 x 100 mL) and the combined organic layers were dried over MgSO<sub>4</sub>, filtered, and concentrated in vacuo to afford red oil, which was purified by silica gel chromatography (10% EtOAc in hexanes to 20% acetone in CH<sub>2</sub>Cl<sub>2</sub>) to furnish 1.36 g (1.58 mmol, 94% yield) of **imid(S)-3a** as white solid. **Mp:** >300 °C. **IR (neat):** 3004 (w), 2958 (s), 2928 (m), 2867 (w), 2356 (w), 2340 (w), 2214 (w), 2197 (w), 2190 (w), 2167 (w), 2006 (w), 1978 (w), 1966 (w), 1614 (s), 1583 (s), 1542 (w), 1496 (m), 1475 (s), 1458 (m), 1434 (w), 1382 (m), 1361 (m), 1314 (m), 1279 (s), 1235 (s), 1223 (s), 1201 (s), 1141 (s), 1095 (m), 1075 (m), 1051 (m), 1021 (s), 939 (w), 892 (m), 876 (m), 866 (w), 817 (w), 791 (m), 755 (s), 734 (s), 709 (s), 665 (w), 646 (m), 629 (w), 608 (s), 576 (s), 558 (w), 537 (m), 512 (w), 494 (s), 475 (s), 460 (m), 442 (m), 428 (w), 415 (w) cm<sup>-1</sup>; **<sup>1</sup>H NMR (CDCl<sub>3</sub>, 400 MHz):** δ 9.19 (1H, s), 8.27 (1H, dd, *J* = 7.8, 1.2 Hz), 7.60–7.57 (2H, m), 7.46–7.43 (5H, m), 7.35 (1H, t, *J* = 7.6 Hz), 7.32 (2H, t, *J* = 3.2 Hz), 7.29 (2H, t, *J* = 1.2 Hz), 7.26 (1H, s), 7.07 (1H, t, *J* = 8.0 Hz), 7.01 (2H, d, *J* = 1.2 Hz), 6.95 (2H, s), 6.94 (1H, s), 6.54 (1H, dd, *J* = 8.2, 1.2 Hz), 6.11 (1H, d, *J* = 10.4 Hz), 5.86 (1H, d, *J* = 10.4 Hz), 2.89 (2H, q, *J* = 6.8 Hz), 2.47 (2H, q, *J* = 6.8 Hz), 2.26 (2H, q, *J* = 6.8 Hz), 1.27 (12H, d, *J* = 6.8 Hz), 1.20 (6H, d, *J* = 6.8 Hz), 0.99 (6H, d, *J* = 6.8 Hz), 0.94 (6H, d, *J* = 6.8 Hz), 0.88 (6H, d, *J* = 6.8 Hz); **<sup>13</sup>C NMR (CDCl<sub>3</sub>, 100 MHz):** δ 157.6, 148.6, 146.1, 145.8, 143.9, 143.0, 135.1, 134.6, 134.1, 133.3, 132.1, 130.9, 130.4, 130.2, 129.9, 129.7, 129.6, 129.3, 128.9, 128.7, 127.4, 121.6, 120.7, 120.5, 74.9, 34.3, 30.4, 30.3, 29.6, 24.2, 24.17, 24.13, 24.0, 23.8; **HRMS (MALDI-TOF):** Calcd for C<sub>57</sub>H<sub>66</sub>N<sub>2</sub>NaO<sub>3</sub>S [M+Na]<sup>+</sup>: 881.4692; found: 881.4714. Specific rotation: [α]<sub>D</sub><sup>22.6</sup> –160.4 (*c* 0.46, CHCl<sub>3</sub>)

## 4 EAS of Bis[(pinacolato)boryl]methane to Trisubstituted Allylic Phosphates (Scheme 22a)

### 4.1 Representative Procedure

An oven-dried 1-dram vial in a N<sub>2</sub>-filled glove box was charged with **NHC(S)-Ag-5a** (7.4 mg, 0.011 mmol), CuCl (1.0 mg, 0.01 mmol), and NaOMe (8.4 mg, 0.15 mmol). The vial was sealed (phenolic open top cap with red PTFE/white silicon septum and electrical tape). After addition of thf by syringe (0.5 mL), the resulting blue solution was allowed to stir five min at 22 °C. A solution of bis[(pinacolato)boryl]methane (40.2 mg, 0.15 mmol) in thf (0.5 mL) was added, causing the mixture to turn brown. The mixture was allowed to stir for five min at 22 °C, after which it was charged with a solution of allylic phosphate (0.1 mmol) in thf (0.5 mL). The mixture was allowed to stir at 22 °C for 12 h, after which it was passed through a short plug of silica gel and eluted with Et<sub>2</sub>O (3 mL). The resulting solution was concentrated in vacuo, affording yellow oil residue, which was purified by silica gel chromatography to afford the desired product as colorless oil.



#### 4.2 Methyl-(*R*)-3-(4-bromophenyl)-2-methylene-4-(4,4,5,5-tetramethyl-1,3,2-dioxaborolan-2-yl)butanoate

**IR (neat):** 2977 (w), 2931, (w), 1721 (w), 1627 (w), 1485 (w), 1467 (w), 1438 (w), 1367 (m), 1317 (s), 1269 (m), 1214 (w), 1141 (s), 1098 (w), 1072 (w), 1036 (w), 1010 (s), 967 (m), 890 (w), 845 (m), 817 (w)  $\text{cm}^{-1}$ ;  **$^1\text{H NMR}$  ( $\text{CDCl}_3$ , 400 MHz):**  $\delta$  7.37–7.33 (2H, m), 7.12–7.09 (2H, m), 6.26 (1H, s), 5.68 (1H, s), 4.11 (1H, t,  $J = 8$  Hz), 3.62 (3H, s), 1.35–1.23 (2H, m), 1.11 (12H, s);  **$^{13}\text{C NMR}$  ( $\text{CDCl}_3$ , 100 MHz):**  $\delta$  167.2, 145.0, 143.7, 131.3, 129.7, 123.9, 120.0, 83.4, 51.9, 41.6, 24.9; **HMRS ( $\text{ESI}^+$ ):** Calcd for  $\text{C}_{18}\text{H}_{25}\text{BBrO}_4$  [ $\text{M}+\text{H}^+$ ]: 395.1029; found: 395.1023. Specific rotation  $[\alpha]^{20} -37.0$  ( $c$  0.81,  $\text{CHCl}_3$ ) for a sample of 98:2 e.r. Enantiomeric purity was determined by HPLC analysis in comparison with authentic racemic material; Chiralcel OJ-H, 99% hexanes, 1% *i*PrOH, 1.0 mL/min, 220 nm.



| Retention Time | Area     | Area % | Retention Time | Area    | Area % |
|----------------|----------|--------|----------------|---------|--------|
| 4.886          | 27126918 | 52.640 | 4.830          | 153111  | 2.774  |
| 5.265          | 24406309 | 47.360 | 5.253          | 5365817 | 97.226 |



#### 4.3 Methyl-(*R*)-2-methylene-3-phenyl-4-(4,4,5,5-tetramethyl-1,3,2-dioxaborolan-2-yl)butanoate

**IR (neat):** 2978 (w), 2931 (w), 1722 (m), 1626 (w), 1493 (w), 1437 (w), 1389 (w), 1359 (m), 1320 (m), 1272 (w), 1212 (w), 1143 (s), 1111 (w), 1082 (w), 1059 (w), 1006 (w), 986 (w)  $\text{cm}^{-1}$ ;  **$^1\text{H NMR}$  ( $\text{CDCl}_3$ , 400 MHz):**  $\delta$  7.23 (4H, d,  $J = 4.3$  Hz), 7.18–7.10 (1H, m), 6.25 (1H, s), 5.68 (1H, t,  $J = 1.2$  Hz), 4.17 (1H, t,  $J = 8.2$  Hz), 3.65 (3H, s), 1.34 (2H, dd,  $J = 8.3, 4.7$  Hz), 1.11 (6H, s), 1.10 (6H, s);  **$^{13}\text{C NMR}$  ( $\text{CDCl}_3$ , 100 MHz):**  $\delta$  167.5, 145.5, 144.6, 128.3, 127.9, 126.3, 123.6, 83.3, 51.9, 42.1, 24.8, 24.8; **HMRS ( $\text{ESI}^+$ ):** Calcd for  $\text{C}_{18}\text{H}_{26}\text{BO}_4$  [ $\text{M}+\text{H}^+$ ]: 317.1919; found: 317.1923. Specific rotation  $[\alpha]^{20} -79.1$  ( $c$  0.3,  $\text{CHCl}_3$ ) for

a sample of 98:2 e.r. Enantiomeric purity was determined by HPLC analysis in comparison with authentic racemic material; Chiracel OJ-H, 99% hexanes, 1% *i*PrOH, 1.0 mL/min, 220 nm.



| Retention Time | Area   | Area % | Retention Time | Area    | Area % |
|----------------|--------|--------|----------------|---------|--------|
| 7.174          | 476410 | 50.171 | 7.088          | 109648  | 2.312  |
| 9.251          | 473163 | 59.829 | 9.015          | 4632424 | 97.688 |



#### 4.4 Methyl-(*R*)-3-cyclohexyl-2-methylene-4-(4,4,5,5-tetramethyl-1,3,2-dioxaborolan-2-yl)butanoate

**IR (neat):** 2978 (w), 2924 (w), 2851 (w), 1719 (m), 1623 (w), 1437 (w), 1364 (m), 1320 (m), 1268 (w), 1227 (w), 1200 (w), 1143 (s), 1001 (w), 967 (w)  $\text{cm}^{-1}$ ;  **$^1\text{H NMR}$  ( $\text{CDCl}_3$ , 400 MHz)**  $\delta$  6.18 (1H, s), 5.48 (1H, s), 3.73 (3H, s), 2.71 (1H, dt,  $J = 6.0, 10.8$  Hz), 1.72–1.59 (5H, m), 1.39–1.30 (1H, m), 1.26–1.05 (5H, m), 1.18 (6H, s), 1.16 (6H, s), 0.98–0.78 (2H, m);  **$^{13}\text{C NMR}$  ( $\text{CDCl}_3$ , 100 MHz):**  $\delta$  168.2, 145.2, 124.4, 83.1, 51.8, 43.0, 41.8, 31.3, 29.7, 26.71, 26.69, 26.68, 25.0, 24.7; **HRMS (ESI<sup>+</sup>):** Calcd for  $\text{C}_{18}\text{H}_{32}\text{BO}_4$   $[\text{M}+\text{H}^+]$ : 323.2394; found: 323.2302. Specific rotation  $[\alpha]^{20} -1.31$  ( $c$  1.91,  $\text{CHCl}_3$ ) for a sample of 98:2 e.r. Enantiomeric purity was determined by HPLC analysis in comparison with authentic racemic material; Chiracel OZ-H, 99.5% hexanes, 0.5% *i*PrOH, 1.0 mL/min, 220 nm.



| Retention Time | Area     | Area % | Retention Time | Area     | Area % |
|----------------|----------|--------|----------------|----------|--------|
| 22.641         | 11050075 | 47.926 | 22.119         | 36006160 | 97.789 |
| 23.955         | 12006674 | 52.073 | 24.043         | 813958   | 2.211  |



#### 4.5 Methyl-(*R*)-2-methylene-5-phenyl-3-((4,4,5,5-tetramethyl-1,3,2-dioxaborolan-2-yl)methyl)pentanoate

**IR (neat):** 3025 (w), 2977 (w), 2926 (w), 2855 (w), 1719 (m), 1625 (w), 1496 (w), 1454 (w), 1437 (w), 1369 (m), 1321 (m), 1269 (m), 1197 (m), 1143 (s), 1107 (w), 1030 (w), 1004 (w), 968 (w)  $\text{cm}^{-1}$ ;  **$^1\text{H}$  NMR ( $\text{CDCl}_3$ , 400 MHz):**  $\delta$  7.27–7.23 (2H, m), 7.17–7.14 (3H, m), 6.20 (1H, s), 5.58 (1H, s), 3.75 (3H, s), 2.96 (1H, m), 2.55 (2H, m), 1.92–1.83 (1H, m), 1.80–1.71 (1H, m), 1.21 (6H, s), 1.20 (6H, s), 1.08 (2H, dq,  $J = 6.8, 15.6$  Hz);  **$^{13}\text{C}$  NMR ( $\text{CDCl}_3$ , 100 MHz):**  $\delta$  167.9, 145.7, 142.8, 128.5, 128.4, 125.7, 124.0, 83.2, 51.8, 38.7, 36.6, 33.7, 24.9; **HRMS (ESI $^+$ ):** Calcd for  $\text{C}_{20}\text{H}_{30}\text{BO}_4$  [ $\text{M}+\text{H}^+$ ]: 345.2247; found: 345.2247. Specific rotation  $[\alpha]^{20} -25.7$  ( $c$  1.36,  $\text{CHCl}_3$ ) for a sample of 90:10 e.r. Enantiomeric purity was determined by HPLC analysis in comparison with authentic racemic material; Chiralcel OJ-H, 99% hexanes, 1% *i*PrOH, 1.0 mL/min, 220 nm.



| Retention Time | Area    | Area % | Retention Time | Area     | Area % |
|----------------|---------|--------|----------------|----------|--------|
| 10.050         | 3282514 | 49.878 | 12.265         | 8172576  | 10.319 |
| 13.269         | 3298602 | 50.122 | 14.455         | 71023094 | 89.681 |

## 5 EAS of Bis[(pinacolato)boryl]methane to *Z*-Trisubstituted Allylic Phosphates (Scheme 22b)

### 5.1 Representative Procedure

An oven-dried 1-dram vial in a  $\text{N}_2$ -filled glove box and equipped with a stir bar was charged with **NHC(S)-Ag-5b** (4.0 mg, 2.75  $\mu\text{mol}$ ) and  $\text{CuCl}$  (0.5 mg, 5  $\mu\text{mol}$ ). Tetrahydrofuran (0.8 mL) was added and the mixture was allowed to stir for two h at 22  $^\circ\text{C}$ , after which  $\text{NaOMe}$  (6.5 mg, 120  $\mu\text{mol}$ ) was added and the vial was sealed (capped with phenolic open-top cap with a red PTFE/white silicon septum and electrical

tape) and removed from the glove box. A solution of allylic phosphate (0.10 mmol) and bis[(pinacolato)boryl]methane (40.2 mg, 0.15 mmol) in thf (0.3 mL) was added by syringe and the mixture was allowed to stir for 24 h at 22 °C, after which it was passed through a short plug of silica gel and eluted with Et<sub>2</sub>O. The volatiles were removed in vacuo, and NaBO<sub>3</sub>•4H<sub>2</sub>O (46.2 mg, 0.30 mmol), thf (1 mL) and H<sub>2</sub>O (1 mL) was added to the yellow oil. The mixture was allowed to stir for three h at 22 °C, after which H<sub>2</sub>O and Et<sub>2</sub>O were added, the organic layer separated, and the aqueous layer was washed with Et<sub>2</sub>O (3 x 2 mL). The combined organic layers were dried with Na<sub>2</sub>SO<sub>4</sub> and the volatiles were in vacuo. The resulting yellow oil was purified by silica gel chromatography to afford the desired product as colorless oil.



## 5.2 (S)-2-Methyl-2-phenylbut-3-en-1-ol<sup>8</sup>

<sup>1</sup>H NMR (CDCl<sub>3</sub>, 400 MHz): δ 7.36–7.24 (5H, m), 6.08 (1H, dd, *J* = 17.6, 10.8 Hz), 5.28 (1H, dd, *J* = 10.8, 1.2 Hz), 5.16 (1H, dd, *J* = 17.6, 1.2 Hz), 3.80 (2H, d, *J* = 6.4 Hz), 1.44 (3H, s), 1.35 (1H, br, s). Specific rotation: [α]<sub>D</sub><sup>20</sup> 16.3 (*c* 1.0, EtOH) for an enantiomerically enriched sample of 92:8 e.r.

### 5.2.1 Determination of stereochemical identity

Previously reported specific rotation: [α]<sub>D</sub><sup>20</sup> –18.1 (*c* 1.9, EtOH) for an enantiomerically enriched sample of 90.5:9.5 e.r. (*R* major).<sup>9</sup> Enantiomeric purity was determined by HPLC analysis in comparison with authentic racemic material; Chiralpak AZ-H column, 99.5% hexanes, 0.5% *i*PrOH, 1.0 mL/min, 220 nm.



| Retention Time | Area   | Area % | Retention Time | Area     | Area % |
|----------------|--------|--------|----------------|----------|--------|
| 24.306         | 288015 | 50.454 | 24.895         | 19490025 | 92.084 |
| 31.013         | 282834 | 49.546 | 32.731         | 1675487  | 7.916  |



### 5.3 (S)-2-(2-Methoxyphenyl)-2-methylbut-3-en-1-ol

**IR (neat):** 3421 (br), 2936 (w), 2881 (w), 1598 (w), 1498 (s), 1462 (m), 1434 (m), 1240 (s), 1027 (s), 914 (m), 753 (s), 700 (w)  $\text{cm}^{-1}$ ;  **$^1\text{H}$  NMR ( $\text{CDCl}_3$ , 400 MHz):**  $\delta$  7.29 (1H, dd,  $J = 8.0, 1.6$  Hz), 7.24–7.20 (1H, m), 6.94–6.88 (2H, m), 6.20 (1H, dd,  $J = 18.0, 10.4$  Hz), 5.16 (1H, dd,  $J = 10.8, 1.2$  Hz), 5.03 (1H, dd,  $J = 18.0, 1.2$  Hz), 3.98–3.93 (1H, m), 3.89–3.84 (1H, m), 3.80 (3H, s), 1.44 (3H, s);  **$^{13}\text{C}$  NMR ( $\text{CDCl}_3$ , 100 MHz):**  $\delta$  157.9, 144.0, 132.3, 129.1, 128.0, 120.7, 113.2, 111.9, 68.5, 55.2, 47.0, 21.7; **HRMS (ESI $^+$ ):** Calcd for  $\text{C}_{12}\text{H}_{16}\text{O}_2$   $[\text{M}+\text{H}]^+$ : 193.1229; found: 193.123. Specific rotation:  $[\alpha]_{\text{D}}^{20}$  14.4 ( $c$  0.5,  $\text{CHCl}_3$ ) for an enantiomerically enriched sample of 95:5 e.r. Enantiomeric purity was determined by HPLC analysis in comparison with authentic racemic material; Chiralcel OD-H column, 99% hexanes, 1% *i*PrOH, 0.5 mL/min, 220 nm.



| Retention Time | Area    | Area % | Retention Time | Area    | Area % |
|----------------|---------|--------|----------------|---------|--------|
| 39.564         | 3181337 | 49.712 | 39.588         | 123905  | 4.814  |
| 44.708         | 3218168 | 50.288 | 44.621         | 2449898 | 95.186 |



### 5.4 (R)-2-(((tert-Butyldimethylsilyl)oxy)methyl)-2-methylbut-3-en-1-ol

**IR (neat):** 2927 (m), 1723 (s), 1470 (m), 1268 (s), 1096 (s), 1027 (m), 837 (s), 776 (m), 709 (s)  $\text{cm}^{-1}$ ;  **$^1\text{H}$  NMR ( $\text{CDCl}_3$ , 400 MHz):**  $\delta$  5.81 (1H, dd,  $J = 17.6, 10.8$  Hz), 5.13 (1H, dd,  $J = 6.8, 1.2$  Hz), 5.09 (1H, dd,  $J = 12.8, 1.2$  Hz), 3.63–3.45 (4H, m), 2.52 (1H, br), 1.00 (3H, s), 0.89 (9H, s), 0.04 (6H, s);  **$^{13}\text{C}$  NMR ( $\text{CDCl}_3$ , 100 MHz):**  $\delta$  141.5, 114.6, 70.6, 70.0, 43.2, 26.0, 18.6, 18.3,  $-5.50, -5.48$ ; **HRMS (ESI $^+$ ):** Calcd for  $\text{C}_{12}\text{H}_{25}\text{OSi}$   $[\text{M}+\text{H}-\text{H}_2\text{O}]^+$ : 213.1675; found: 213.168. Specific rotation:  $[\alpha]_{\text{D}}^{20}$  0.2 ( $c$  1.0,  $\text{CHCl}_3$ ) for an

enantiomerically enriched sample of 84:16 e.r. Enantiomeric purity was determined by HPLC analysis in comparison with authentic racemic material of benzoate derivatives; Chiralcel OD-H column, 100% hexanes, 0.2 mL/min, 220 nm.



| Retention Time | Area     | Area % | Retention Time | Area     | Area % |
|----------------|----------|--------|----------------|----------|--------|
| 38.643         | 52778054 | 47.222 | 36.267         | 8858598  | 15.701 |
| 40.337         | 58987079 | 52.778 | 37.567         | 47563137 | 84.299 |

## 6 ECA of Alkenyl–Al Compounds to Cyclic Enones (Schemes 49-50)

### 6.1 Representative Procedure

In a glove box, an oven-dried 4-dram vial was charged with **NHC(S)–Ag-2d** (2.70 mg, 2.50  $\mu\text{mol}$ ) and  $\text{CuCl}_2 \cdot 2\text{H}_2\text{O}$  (0.850 mg, 5.00  $\mu\text{mol}$ ). The vial was sealed (septum), and thf (1.0 mL) was added by syringe and the resulting blue solution was allowed to stir for five min. To this mixture was added (syringe, at  $-78^\circ\text{C}$ , sequentially), diisobutyl(oct-1-en-2-yl)aluminum (160  $\mu\text{L}$ , 0.20 mmol, 1.25 M) (CAUTION: Flammable!) and 3-methylcyclopentenone (9.9  $\mu\text{L}$ , 0.10 mmol), which resulted in a brown solution. The mixture was allowed to stir for 12 h at  $-50^\circ\text{C}$ , after which the reaction was quenched by the addition of a saturated solution aqueous of sodium potassium tartrate (2 mL). The mixture was washed with  $\text{Et}_2\text{O}$  (2 x 1 mL), passed through a short plug of silica gel (2 cm x 1 cm), and eluted with  $\text{Et}_2\text{O}$ . The organic layer was dried over  $\text{MgSO}_4$ , filtered, and the volatiles were removed in vacuo to furnish yellow oil, which was purified by silica gel chromatography to afford 17.7 mg of (*R*)-3-methyl-3-(oct-1-en-2-yl)cyclopentan-1-one as colorless oil (0.085 mmol, 85% yield).



### 6.2 (*R*)-3-Methyl-3-(oct-1-en-2-yl)cyclopentanone

**IR (neat):** 2956 (m), 2926 (s), 2856 (m), 1745 (s), 1637 (w), 1588 (w), 1465 (m), 1406 (w), 1377 (w), 1249 (w), 1160 (w), 895 (w), 725 (w)  $\text{cm}^{-1}$ ;  **$^1\text{H NMR}$  ( $\text{CDCl}_3$ , 400 MHz):**  $\delta$  4.81 (1H, s), 4.81 (1H, s), 2.41 (1H,

d,  $J = 17.6$  Hz), 2.31–2.27 (2H, m), 2.13 (1H, d,  $J = 17.6$  Hz), 2.07–2.01 (3H, m), 1.91–1.85 (1H, m), 1.49–1.43 (2H, m), 1.36–1.25 (6H, m), 1.17 (3H, s), 0.89 (3H, t,  $J = 6.0$  Hz);  $^{13}\text{C}$  NMR ( $\text{CDCl}_3$ , 100 MHz): 219.2, 155.0, 107.7, 51.5, 45.5, 36.7, 34.0, 32.0, 31.7, 29.5, 28.9, 26.2, 22.8, 14.2; HRMS (EI+): Calcd for  $\text{C}_{14}\text{H}_{25}\text{O}$   $[\text{M}+\text{H}]^+$ : 209.1905; found: 209.1903. Specific rotation:  $[\alpha]_{\text{D}}^{24} -10.0$  ( $c$  1.04,  $\text{CHCl}_3$ ) for an enantiomerically enriched sample of 91:9 e.r. Enantiomeric purity was determined by GC analysis in comparison with authentic racemic material; CDMDM column, 15 psi, 120 °C.



| Retention Time | Area   | Area % | Retention Time | Area   | Area % |
|----------------|--------|--------|----------------|--------|--------|
| 66.577         | 1429.1 | 49.765 | 68.053         | 143.5  | 9.175  |
| 69.361         | 1442.6 | 50.235 | 69.479         | 1420.6 | 90.825 |



### 6.3 (R)-3-Methyl-3-(oct-1-en-2-yl)cyclohexanone

**IR (neat):** 2955 (m), 2929 (s), 2858 (m), 1714 (s), 1634 (w), 1457 (m), 1423 (w), 1377 (w), 1350 (w), 1289 (m), 1226 (w), 1080 (w), 903 (m)  $\text{cm}^{-1}$ ;  $^1\text{H}$  NMR ( $\text{CDCl}_3$ , 400 MHz):  $\delta$  4.85 (2H, s), 2.60 (1H, dd,  $J = 14.0, 1.2$  Hz), 2.33–2.17 (3H, m), 2.00–1.90 (3H, m), 1.86–1.68 (2H, m), 1.62–1.60 (1H, m), 1.47–1.41 (2H, m), 1.36–1.26 (6H, m), 1.08 (3H, s), 0.89 (3H, t,  $J = 5.6$  Hz);  $^{13}\text{C}$  NMR ( $\text{CDCl}_3$ , 100 MHz):  $\delta$  211.9, 154.3, 109.7, 52.9, 44.4, 40.1, 35.0, 32.0, 30.8, 29.6, 29.1, 26.9, 22.8, 22.0, 14.2; HRMS (EI+): Calcd for  $\text{C}_{15}\text{H}_{27}\text{O}$   $[\text{M}+\text{H}]^+$ : 223.2062; found: 223.2064. Specific rotation:  $[\alpha]_{\text{D}}^{24} +25.2$  ( $c$  1.42,  $\text{CHCl}_3$ ) for an enantiomerically enriched sample of 92:8 e.r. Enantiomeric purity was determined by GC analysis in comparison with authentic racemic material; CDGTA column, 15 psi, 140 °C.



| Retention Time | Area   | Area % | Retention Time | Area    | Area % |
|----------------|--------|--------|----------------|---------|--------|
| 32.870         | 1557.5 | 49.219 | 31.185         | 1892.4  | 7.766  |
| 35.461         | 1606.9 | 50.781 | 32.689         | 22474.4 | 92.234 |



#### 6.4 (S)-3-Methyl-3-(1-phenylvinyl)cyclopentanone

**IR (neat):** 2959 (w), 2873 (w), 1741 (s), 1627 (w), 1598 (w), 1573 (w), 1492 (w), 1441 (w), 1405 (w), 1375 (w), 1280 (w), 1249 (w), 1231 (w), 1208 (w), 1165 (m), 1120 (w), 1074 (w), 1028 (w), 980 (w), 906 (m), 877 (w), 812 (w), 774 (w), 812 (w), 774 (w), 752 (m), 702 (w)  $\text{cm}^{-1}$ ;  **$^1\text{H NMR}$  ( $\text{CDCl}_3$ , 400 MHz):** 7.30–7.22 (3H, m), 7.14–7.12 (2H, m), 5.16 (1H, d,  $J = 0.8$  Hz), 4.94 (1H, d,  $J = 0.8$  Hz), 2.48 (1H, d,  $J = 17.2$  Hz), 2.30–2.26 (2H, m), 2.19–2.11 (2H, m), 1.87–1.81 (1H, m), 1.23 (3H, s);  **$^{13}\text{C NMR}$  ( $\text{CDCl}_3$ , 100 MHz):** 218.6, 156.4, 142.3, 128.7, 128.0, 127.1, 113.7, 51.9, 45.1, 36.6, 34.5, 26.6; **HRMS (EI+):** Calcd for  $\text{C}_{14}\text{H}_{17}\text{O}$   $[\text{M}+\text{H}]^+$ : 201.1279; found: 201.1285. Specific Rotation:  $[\alpha]_{\text{D}}^{24} -11.3$  ( $c$  0.73,  $\text{CHCl}_3$ ) for an enantiomerically enriched sample of 92:8 e.r. Enantiomeric purity was determined by GC analysis in comparison with authentic racemic material;  $\beta$ -dex column, 15 psi, 120 °C.



| Retention Time | Area    | Area % | Retention Time | Area     | Area % |
|----------------|---------|--------|----------------|----------|--------|
| 211.195        | 15142.8 | 49.620 | 208.466        | 55789.7  | 8.189  |
| 214.783        | 15374.7 | 50.380 | 210.635        | 625469.2 | 91.81  |



#### 6.5 (S)-3-Methyl-3-(1-phenylvinyl)cyclohexanone

**IR (neat):** 2956 (m), 2872 (w), 1707 (s), 1625 (w), 1491 (w), 1441 (w), 1421 (w), 1399 (w), 1375 (w), 1349 (w), 1289 (w), 1226 (m), 1135 (w), 1074 (w), 1028 (w), 951 (w), 909 (m), 773 (m), 703 (s), 676 (w), 636 (w), 614 (w), 571 (w), 538 (m), 503 (m), 440 (w), 420 (w)  $\text{cm}^{-1}$ ;  **$^1\text{H NMR}$  ( $\text{CDCl}_3$ , 400 MHz):**  $\delta$  7.30–7.23 (3H, m), 7.11–7.08 (2H, m), 5.18 (1H, d,  $J = 0.8$  Hz), 4.91 (1H, d,  $J = 1.2$  Hz), 2.66 (1H, d,  $J = 14.0$  Hz), 2.32–2.22 (3H, m), 1.96–1.79 (3H, m), 1.63–1.57 (1H, m), 1.13 (3H, s);  **$^{13}\text{C NMR}$  ( $\text{CDCl}_3$ , 100 MHz):**  $\delta$  211.6, 156.4, 142.2, 129.2, 127.7, 126.9, 115.1, 52.8, 44.2, 40.9, 35.0, 26.7, 22.2; **HRMS (EI+):** Calcd

for C<sub>15</sub>H<sub>19</sub>O [M+H]<sup>+</sup>: 215.1436; found: 215.1438. Specific rotation:  $[\alpha]_{\text{D}}^{24} +32.2$  (*c* 0.980, CHCl<sub>3</sub>) for an enantiomerically enriched sample of 96:4 e.r.

### 6.5.1 Determination of Stereochemical Identity

Formerly reported specific rotation:  $[\alpha]_{\text{D}}^{20} -33.4$  (*c* 1.00, CHCl<sub>3</sub>) for an enantiomerically enriched sample of 94:6 e.r. of the *R* enantiomer.<sup>10</sup> Enantiomeric purity was determined by GC analysis in comparison with authentic racemic material; β-dex column, 15 psi, 140 °C.



| Retention Time | Area    | Area % | Retention Time | Area     | Area % |
|----------------|---------|--------|----------------|----------|--------|
| 129.56         | 82723.2 | 48.794 | 129.267        | 29758.8  | 3.413  |
| 132.75         | 86812.9 | 51.206 | 132.336        | 842161.3 | 96.587 |

## 7 Kinetic Isotope Effect Experiments



### 7.1 (*E*)-Methyl (5-phenylpent-2-en-1-yl-1,1-d<sub>2</sub>) carbonate

This compound was prepared according to a previously reported procedure.<sup>11</sup> **IR (neat):** 3025 (w), 2952 (w), 2851 (w), 1741 (s), 1494 (w), 1439 (m), 1275 (s), 1179 (m), 1050 (m), 969 (m), 924 (m), 790 (m), 747 (m), 698 (m) cm<sup>-1</sup>; **<sup>1</sup>H NMR (CDCl<sub>3</sub>, 400 MHz):** δ 7.33–7.25 (2H, m), 7.22–7.15 (3H, m), 5.87 (1H, dt, *J* = 15.4, 6.7 Hz), 5.62 (1H, d, *J* = 15.4 Hz), 3.79 (3H, s), 2.74–2.66 (2H, m), 2.47–2.24 (2H, m); **<sup>13</sup>C NMR (CDCl<sub>3</sub>, 100 MHz):** δ 155.8, 141.6, 136.5, 128.5, 128.5, 126.1, 123.9, 68.0 (m), 54.8, 35.4, 34.1; **HRMS (DART):** Calcd for C<sub>13</sub>H<sub>18</sub>D<sub>2</sub>O<sub>3</sub>N [M+NH<sub>4</sub><sup>+</sup>]: 240.1569. Found: 240.157.

### 7.2 Competition experiment between S4 and S4-d<sub>2</sub> and determination of the secondary kinetic isotope effect (SKIE) for C–O bond cleavage at Cα

In a N<sub>2</sub>-filled glove box, an oven-dried 1-dram vial (“Vial 1”) equipped with a stir bar was charged with the corresponding imidazolium salt (2.8 mg, 6.0 μmol), NaOMe (4.3 mg, 80 μmol), Cu(OTf)<sub>2</sub> (1.8 mg, 5.0

$\mu\text{mol}$ ) and dme (0.4 mL), and the mixture was allowed to stir for 1 h at 22 °C. At this point,  $\text{B}_2(\text{pin})_2$  (25.4 mg, 0.10 mmol) was added and the mixture was allowed to stir for an additional 30 min.

In an  $\text{N}_2$ -filled glove box, a second oven-dried 1-dram vial (“Vial 2”) was charged with **S4** (24.2 mg, 0.11 mmol), **S4- $d_2$**  (24.4 mg, 0.11 mmol) and dme (0.1 mL). The solution in Vial 2 was transferred to Vial 1 and the resulting mixture was allowed to stir for 30 min at 22 °C. The solution was passed through a short plug of silica gel (4 cm x 1 cm) and eluted with  $\text{Et}_2\text{O}$ . The filtrate was concentrated in vacuo and the resulting yellow oil was dissolved in  $\text{Et}_2\text{O}$ , after which, at 0 °C,  $\text{H}_2\text{O}_2$  (30 wt% in  $\text{H}_2\text{O}$ , 125  $\mu\text{L}$ ) and  $\text{NaOH}$  (2.0 M in  $\text{H}_2\text{O}$ , 0.5 mL) were added, and the mixture was allowed to stir for 1 h at 0 °C. The solution was passed through a short plug of silica gel (4 cm x 1 cm) and eluted with  $\text{Et}_2\text{O}$ . The filtrate was concentrated in vacuo and the resulting yellow oil was purified by silica gel chromatography to afford a mixture of **S5** and **S5- $d_2$**  as colorless oil (11.7 mg, 0.072 mmol, 72% yield). The ratio of **S5**:**S5- $d_2$**  was determined by analysis of the  $^1\text{H}$  NMR spectrum of the purified product.

The relative rates corresponding to the reactions with **S5** and **S5- $d_2$** , respectively, were determined by the use of the following formula:

$$k_H/k_D = n_{S2}/n_{S2-d2}$$

Accordingly, we measured SKIE ( $k_H/k_D = 1.12 \pm 0.02$ ) as the average of three independent experiments (1.10, 1.12, 1.14).



### 7.3 (E)-Diethyl (5-phenylpent-2-en-1-yl-1,1- $d_2$ ) phosphate

This material was prepared according to a previously reported procedure.<sup>11</sup> **IR (neat)**: 3472 (br), 3024 (w), 2980 (w), 2928 (w), 1667 (w), 1495 (w), 1453 (w), 1392 (w), 1263 (m), 1015 (s), 968 (s), 799 (m), 746 (m), 698 (m)  $\text{cm}^{-1}$ ;  **$^1\text{H}$  NMR ( $\text{CDCl}_3$ , 400 MHz)**:  $\delta$  7.32–7.24 (2H, m), 7.23–7.14 (3H, m), 5.84 (1H, dt,  $J = 15.4, 6.6$  Hz), 5.64 (1H, d,  $J = 15.4$  Hz), 4.17–3.99 (4H, m), 2.90–2.57 (2H, m), 2.51–2.26 (2H, m), 1.55–1.09 (6H, m);  **$^{13}\text{C}$  NMR ( $\text{CDCl}_3$ , 100 MHz)**:  $\delta$  141.5, 135.5, 128.5 (d,  $J = 3.1$  Hz), 126.0, 125.1, 125.1, 68.4–66.7 (m), 63.8 (d,  $J = 5.7$  Hz), 35.3, 34.0, 16.2 (d,  $J = 6.7$  Hz); **HRMS (DART)**: Calcd for  $\text{C}_{15}\text{H}_{22}\text{D}_2\text{O}_4\text{P} [\text{M}+\text{H}^+]$ : 301.1538. Found: 301.1533.

### 7.4 Competition experiment between **S6** and **S6- $d_2$** and determination of the secondary kinetic isotope effect (SKIE) for C–O bond cleavage at $\text{C}\alpha$

In a  $\text{N}_2$ -filled glove box an oven-dried 1-dram vial (“Vial 1”) equipped with a stir bar was charged with the corresponding imidazolium salt (9.3 mg, 11.0  $\mu\text{mol}$ ),  $\text{NaOMe}$  (2.7 mg, 50  $\mu\text{mol}$ ),  $\text{CuCl}$  (1.0 mg, 10.0

$\mu\text{mol}$ ), and thf (0.7 mL). The mixture was allowed to stir for 1 h at 22 °C. The allenyl-B(pin) compound (24.9 mg, 0.15 mmol) was added and the mixture was allowed to stir for another 30 min at 22 °C.

In a N<sub>2</sub>-filled glove box, a second oven-dried 1-dram vial (“Vial 2”) was charged with **S6** (14.9 mg, 0.05 mmol), **S6-d<sub>2</sub>** (15.0 mg, 0.05 mmol), and thf (0.3 mL). The solution in Vial 2 was transferred to Vial 1 and the mixture was allowed to stir for 30 min at 22 °C. The mixture was passed through a short plug of silica gel (4 cm x 1 cm) and eluted with Et<sub>2</sub>O. The filtrate was concentrated in vacuo and the resulting yellow oil was purified by silica gel chromatography to afford a mixture of **S7** and **S7-d<sub>2</sub>** as colorless oil (4.1 mg, 0.022 mmol, 22% yield). The ratio of **S7**:**S7-d<sub>2</sub>** was determined by analysis of the <sup>1</sup>H NMR spectrum of the purified product.

The relative rates corresponding to the reactions with **S7** and **S7-d<sub>2</sub>**, respectively, were determined through the use of the following formula:

$$k_H/k_D = n_{S4}/n_{S4-d2}$$

According, we measured SKIE ( $k_H/k_D = 1.21 \pm 0.01$ ) as the average of three independent experiments (1.20, 1.21, 1.22).

## 8 Absolute Stereochemistry of Enantioselective Boryl Substitution Products



### 8.1 (*R*)-5-Phenylpent-1-en-3-yl (*S*)-3,3,3-trifluoro-2-methoxy-2-phenylpropanoate (*S*-S8)

This compound was prepared according to a previously reported procedure.<sup>12</sup> The secondary alcohol substrate was accessed by oxidation of the enantiomerically enriched allylic boronate, synthesized by enantioselective boryl substitution with an *E* allylic carbonate.<sup>11b</sup> **IR (neat):** 3025 (w), 2952 (w), 1745 (s), 1496 (w), 1452 (w), 1257 (s), 1168 (s), 1121 (m), 1015 (m), 719 (m), 698 (m) cm<sup>-1</sup>; **<sup>1</sup>H NMR (CDCl<sub>3</sub>, 400 MHz):**  $\delta$  7.59–7.50 (2H, m), 7.43–7.38 (3H, m), 7.33–7.25 (2H, m), 7.23–7.18 (1H, m), 7.16–7.12 (2H, m), 5.77 (1H, ddd,  $J = 17.3, 10.5, 6.9$  Hz), 5.48 (1H, q,  $J = 6.9$  Hz), 5.30 (1H, dt,  $J = 17.2, 1.2$  Hz), 5.25 (1H, dt,  $J = 10.5, 1.1$  Hz), 3.57 (3H, d,  $J = 1.3$  Hz), 2.71–2.60 (2H, m), 2.15–1.91 (2H, m); **<sup>13</sup>C NMR (CDCl<sub>3</sub>, 100 MHz):**  $\delta$  165.9, 141.0, 134.9, 132.4, 129.7, 128.7, 128.5, 128.5, 127.6, 126.3, 123.5 (q,  $J = 288.5$  Hz), 118.9, 84.8 (q,  $J = 27.7$  Hz), 77.2, 55.6, 35.9, 31.4; **HRMS (DART):** Calcd for C<sub>21</sub>H<sub>25</sub>NO<sub>3</sub>F<sub>3</sub> [M+NH<sub>4</sub><sup>+</sup>]: 396.1781; found: 396.1782. Specific rotation:  $[\alpha]_D^{20} -23.1$  ( $c$  0.26, CHCl<sub>3</sub>).

### 8.2 (*R*)-5-Phenylpent-1-en-3-yl (*R*)-3,3,3-trifluoro-2-methoxy-2-phenylpropanoate (*R*-S8)

This compound was prepared according to a formerly reported procedure.<sup>12</sup> **IR (neat):** 3064 (w), 2948 (w), 2924 (w), 1745 (s), 1496 (w), 1452 (w), 1257 (m), 1268 (s), 1121 (m), 1015 (m), 990 (m), 698 (m) cm<sup>-1</sup>;

**<sup>1</sup>H NMR (CDCl<sub>3</sub>, 400 MHz):**  $\delta$  7.60–7.52 (2H, m), 7.45–7.37 (3H, m), 7.31–7.22 (2H, m), 7.18 (1H, t,  $J$  = 7.4 Hz), 7.11–7.04 (1H, m), 5.86 (1H, ddd,  $J$  = 17.4, 10.4, 7.1 Hz), 5.49 (1H, q,  $J$  = 7.0 Hz), 5.38 (1H, dt,  $J$  = 17.2, 1.1 Hz), 5.30 (1H, dt,  $J$  = 10.5, 1.0 Hz), 3.57 (3H, d,  $J$  = 1.3 Hz), 2.54 (2H, dt,  $J$  = 9.2, 5.8 Hz), 2.08–1.87 (2H, m); **<sup>13</sup>C NMR (CDCl<sub>3</sub>, 100 MHz):**  $\delta$  166.0, 141.0, 135.1, 132.6, 129.8, 128.6, 128.6, 128.4, 127.5, 126.2, 123.6 (q,  $J$  = 288.7 Hz), 119.3, 84.6 (q,  $J$  = 28.0 Hz), 55.6, 35.9, 31.1; **HRMS (DART):** Calcd for C<sub>21</sub>H<sub>25</sub>NO<sub>3</sub>F<sub>3</sub> [M+NH<sub>4</sub><sup>+</sup>]: 396.1781; found: 396.1774. Specific rotation:  $[\alpha]_D^{20}$  –33.6 ( $c$  0.27, CHCl<sub>3</sub>).

**Table S1.** Comparison of the chemical shift between (**S**)-**S8** and (**R**)-**S8**.

|                 | $\delta$ <b>S-S8</b> | $\delta$ <b>R-S8</b> | $\Delta\delta^{SR}$ ( $= \delta_{(S)-S8} - \delta_{(R)-S8}$ ) |     |
|-----------------|----------------------|----------------------|---------------------------------------------------------------|-----|
|                 |                      |                      | ppm                                                           | Hz  |
| 1E              | 5.25                 | 5.30                 | –0.05                                                         | –20 |
| 1Z              | 5.30                 | 5.38                 | –0.08                                                         | –32 |
| 2               | 5.77                 | 5.86                 | –0.09                                                         | –36 |
| 3               | 5.48                 | 5.49                 | –0.01                                                         | –4  |
| 4               | 2.03                 | 1.98                 | 0.05                                                          | 20  |
| 5               | 2.65                 | 2.54                 | 0.11                                                          | 44  |
| Ph- <i>o</i> -H | 7.14                 | 7.08                 | 0.06                                                          | 24  |
| Ph- <i>m</i> -H | 7.29                 | 7.26                 | 0.03                                                          | 12  |
| Ph- <i>p</i> -H | 7.20                 | 7.18                 | 0.02                                                          | 8   |

On the basis of the previously reported data,<sup>12</sup> because the hydrogen atoms on C1 and C2 have smaller chemical shift on (**S**)-**S8** (vs. H atoms on C4 and C5), the absolute configuration is determined as *R*.

## 9 Catalytic Enantioselective Silyl Substitution

### 9.1 Representative Procedure

In a N<sub>2</sub>-filled glove box, an oven-dried 1-dram vial equipped with a stir bar was charged with **imid(S)-1a** (0.6 mg, 1.25  $\mu$ mol), CuCl (0.1 mg, 1.00  $\mu$ mol), and NaOMe (4.3 mg, 80  $\mu$ mol). The vial was capped (phenolic open top cap with a red PFTE/white silicon septum, sealed with electrical tape), and removed from the glove box. Tetrahydrofuran (0.5 mL) was added and the mixture was allowed to stir for 1 h at 22 °C, after which the solution was allowed to cool to –78 °C. Allylic phosphate (0.10 mmol) and (dimethylphenylsilyl)boronic acid pinacol ester (39.3 mg, 0.15 mmol in 0.5 mL thf) were added by syringe, and the mixture was allowed to stir for 12 h at –50 °C, after which it was passed through a short plug of silica gel and eluted with Et<sub>2</sub>O (3 mL). The volatiles were removed in vacuo to afford yellow oil residue, which was purified by silica gel chromatography to furnish the desired product as colorless oil.



## 9.2 (S)-Dimethyl(phenyl)(1-phenylallyl)silane<sup>13</sup>

<sup>1</sup>H NMR (CDCl<sub>3</sub>, 400 MHz): δ 7.36–7.24 (5H, m), 7.19–7.15 (2H, m), 7.09–7.05 (2H, m), 6.92–6.89 (1H, m), 6.10 (1H, ddd, *J* = 16.8, 10.0, 10.0 Hz), 4.95–4.87 (2H, m), 3.13 (1H, d, *J* = 10.0 Hz), 0.26 (3H, s), 0.23 (3H, s). Specific rotation:  $[\alpha]_D^{20} +11.5$  (*c* 0.87, CHCl<sub>3</sub>) for a sample with 98:2 e.r.

### 9.2.1 Determination of stereochemical identity

Previous reported specific rotation:  $[\alpha]_D^{20} -7.3$  (*c* 0.77, CHCl<sub>3</sub>) for an enantiomerically enriched sample of 98:2 e.r. of the *R* enantiomer. Enantiomeric purity was determined by GC analysis in comparison with authentic racemic material; Chiraldex GTA column, 90 °C, 20 psi.



| Retention Time | Area      | Area %   | Retention Time | Area       | Area %   |
|----------------|-----------|----------|----------------|------------|----------|
| 314.052        | 374.82727 | 46.19407 | 312.117        | 50.35573   | 2.17003  |
| 324.056        | 436.59125 | 53.80593 | 319.289        | 2270.15088 | 97.82997 |



## 9.3 (S)-(1-(2-Methoxyphenyl)allyl)dimethyl(phenyl)silane<sup>14</sup>

<sup>1</sup>H NMR (CDCl<sub>3</sub>, 400 MHz): δ 7.39–7.27 (5H, m), 7.10–7.05 (1H, m), 6.99–6.96 (1H, m), 6.87–6.83 (1H, m), 6.76–6.74 (1H, m), 6.14 (1H, ddd, *J* = 16.8, 10.6, 9.6 Hz), 4.95–4.90 (2H, m), 3.74 (1H, d, *J* = 9.6 Hz), 3.62 (3H, s), 0.27 (3H, s), 0.23 (3H, s). Specific rotation:  $[\alpha]_D^{20} +18.2$  (*c* 1.10, CHCl<sub>3</sub>) for a sample with 96:4 e.r. Enantiomeric purity was determined by GC analysis in comparison with authentic racemic material; Chiraldex GTA column, 100 °C, 20 psi.



| Retention Time | Area      | Area %   | Retention Time | Area      | Area %   |
|----------------|-----------|----------|----------------|-----------|----------|
| 437.548        | 250.51210 | 48.83429 | 436.853        | 42.30031  | 4.15893  |
| 452.614        | 262.47195 | 51.16571 | 452.099        | 974.79626 | 95.84107 |



#### 9.4 (S)-1-(2-Bromophenyl)allyldimethyl(phenyl)silane<sup>14</sup>

<sup>1</sup>H NMR (CDCl<sub>3</sub>, 400 MHz): δ 7.53–7.50 (1H, m), 7.44–7.30 (5H, m), 7.18–7.14 (1H, m), 6.98–6.93 (2H, m), 6.00 (1H, ddd, *J* = 16.8, 10.0, 9.2 Hz), 4.98–4.88 (2H, m), 3.88 (1H, d, *J* = 9.2 Hz), 0.31 (3H, s), 0.29 (3H, s); optical rotation: [α]<sub>D</sub><sup>20</sup> +33.3 (*c* 0.60, CHCl<sub>3</sub>) for a sample with 96:4 e.r. Enantiomeric purity was determined by HPLC analysis of the boron–hydride addition (9-BBN)/oxidation product in comparison with authentic racemic material; Chiralcel OD-H column, 98% hexanes, 2% *i*PrOH, 0.3 mL/min, 220 nm.



| Retention Time | Area     | Area % | Retention Time | Area     | Area % |
|----------------|----------|--------|----------------|----------|--------|
| 93.073         | 10168769 | 50.143 | 97.450         | 80743856 | 96.436 |
| 109.359        | 10110945 | 49.857 | 113.418        | 3275903  | 3.564  |



### 9.5 (S)-Dimethyl(phenyl)(1-(4-(trifluoromethyl)phenyl)allyl)silane<sup>13</sup>

**<sup>1</sup>H NMR (CDCl<sub>3</sub>, 400 MHz):**  $\delta$  7.42 (2H, d,  $J$  = 8.0 Hz), 7.40–7.30 (5H, m), 6.99 (2H, d,  $J$  = 8.0 Hz), 6.09 (1H, ddd,  $J$  = 17.0, 10.0, 10.0 Hz), 5.02–4.93 (2H, m), 3.22 (1H, d,  $J$  = 10.0 Hz), 0.28 (3H, s), 0.27 (3H, s). Specific rotation:  $[\alpha]_{\text{D}}^{20}$  +14.8 ( $c$  1.35, CHCl<sub>3</sub>) for a sample with 94:6 e.r. Enantiomeric purity was determined by GC analysis in comparison with authentic racemic material; Chiraldex GTA column, 90 °C, 15 psi.



| Retention Time | Area      | Area %   | Retention Time | Area      | Area %   |
|----------------|-----------|----------|----------------|-----------|----------|
| 424.148        | 408.08533 | 46.85027 | 427.469        | 33.90314  | 6.25308  |
| 444.780        | 462.95630 | 53.14973 | 445.651        | 508.27985 | 93.74692 |



### 9.6 (S)-3-(1-(Dimethyl(phenyl)silyl)allyl)pyridine (mixture with S<sub>N</sub>2 product)

**IR (neat):** 3070 (m), 3049 (m), 2957 (s), 2925 (s), 2853 (m), 1626 (m), 1588 (m), 1571 (m), 1477 (s), 1426 (s), 1410 (m), 1249 (s), 1182 (m), 1114 (s), 1078 (m), 1024 (m), 900 (s), 825 (s), 776 (s), 736 (s), 714 (s), 699 (s), 655 (m), 573 (m), 470 (m) cm<sup>-1</sup>; **<sup>1</sup>H NMR (CDCl<sub>3</sub>, 400 MHz):**  $\delta$  8.36–8.24 (2H, ap d), 7.40–7.29 (5H, m), 7.17–7.11 (2H, m), 6.06 (1H, ddd,  $J$  = 16.8, 10.0, 10.0 Hz), 5.03–4.93 (2H, m), 3.14 (1H, d,  $J$  = 10.0 Hz), 0.29 (6H, s); **<sup>13</sup>C NMR (CDCl<sub>3</sub>, 100 MHz):**  $\delta$  149.1, 147.7, 147.5, 146.4, 138.2, 137.6, 136.6, 135.9, 134.6, 134.4, 133.7, 133.2, 132.1, 130.1, 129.7, 129.6, 129.4, 128.0, 127.8, 125.7, 125.4, 123.2, 114.2, 41.6, –4.5, –4.7; **HRMS (ESI<sup>+</sup>)** Calcd for C<sub>16</sub>H<sub>20</sub>N<sub>1</sub>Si<sub>1</sub> [M+H]: 254.13650; found: 254.13549. Specific rotation:  $[\alpha]_{\text{D}}^{20}$  +7.68 ( $c$  1.30, CHCl<sub>3</sub>) for a sample with 96:4 e.r. Enantiomeric purity was

determined by HPLC analysis of product in comparison with authentic racemic material; Chiralcel OD-H column, 95% hexanes, 5% *i*PrOH, 0.1 mL/min, 220 nm.



| Retention Time | Area     | Area % | Retention Time | Area     | Area % |
|----------------|----------|--------|----------------|----------|--------|
| 63.259         | 26168918 | 48.874 | 63.903         | 58469676 | 95.667 |
| 68.776         | 27374405 | 51.126 | 69.221         | 2648418  | 4.333  |



### 9.7 (*R*)-Dimethyl(oct-1-en-3-yl)(phenyl)silane<sup>15</sup>

<sup>1</sup>H NMR (CDCl<sub>3</sub>, 400 MHz): 7.51–7.49 (2H, m), 7.36–7.34 (3H, m), 5.59 (1H, ddd, *J* = 17.0, 10.0, 10.0 Hz), 4.90–4.79 (2H, m), 1.76–1.72 (1H, m), 1.44–1.13 (8H, m), 0.85 (3H, t, *J* = 7.0 Hz), 0.27 (3H, s), 0.26 (3H, s). Specific rotation: [α]<sub>D</sub><sup>20</sup> –74.9 (*c* 0.80, CHCl<sub>3</sub>) for a sample with 94:6 er. Enantiomeric purity was determined by HPLC analysis of the hydroboration (9-BBN)/oxidation product in comparison with authentic racemic material; Chiralcel OD-H column, 98% hexanes, 2% *i*PrOH, 0.3 mL/min, 220 nm.



| Retention Time | Area    | Area % | Retention Time | Area     | Area % |
|----------------|---------|--------|----------------|----------|--------|
| 35.761         | 6731132 | 53.184 | 34.838         | 1742379  | 6.385  |
| 40.011         | 5925289 | 46.816 | 38.746         | 25544831 | 93.615 |

## 10 Carboxylate NHC–Metal Complex



### 1.1 Imidazolium salt S10

In a glove box, an oven-dried 100 mL round bottom flask was charged with (1*S*,2*S*)-N<sup>1</sup>-mesityl-1,2-diphenylethane-1,2-diamine (990 mg, 3.00 mmol), Pd(OAc)<sub>2</sub> (67 mg, 0.3 mmol), *rac*-binap (373 mg, 0.6 mmol), and Cs<sub>2</sub>CO<sub>3</sub> (1.95 g, 6.00 mmol). The flask was removed from the glove box and fitted with a reflux condenser, after which it was charged with a solution of *tert*-butyl 2-bromobenzoate (771 mg, 3.00 mmol in 25 mL toluene), and the resulting mixture was allowed to stir at for 15 h 110 °C. After the mixture was allowed to cool to 22 °C, the volatiles were removed in vacuo, affording dark-red oil, which was dissolved in toluene and purified by silica gel chromatography (100% hexanes to elute toluene, to 5% EtOAc/hexanes), giving to afford 1.29 g (2.55 mmol, 85% yield) of **S9** as yellow solid. An oven-dried 10-dram vial was charged **S9** (396 mg, 0.78 mmol), after which NH<sub>4</sub>BF<sub>4</sub> (123 mg, 1.17 mmol) and triethyl orthoformate (5 mL) were added. The mixture was allowed to stir for 3 h at 110 °C, after which it was allowed to cool to 22 °C. The volatiles were removed in vacuo and the resulting yellow oil was purified by silica gel chromatography (5% MeOH in CH<sub>2</sub>Cl<sub>2</sub>) and recrystallization (CH<sub>2</sub>Cl<sub>2</sub>/Et<sub>2</sub>O/hexanes) to afford 447 mg (0.74 mmol, 95% yield) of **S10** as white solid. **IR (neat)**: 3066 (w), 2979 (w), 2930 (w), 1700 (m), 1619 (s), 1597 (m), 1578 (m), 1484 (w), 1456 (w), 1394 (m), 1369 (m), 1303 (m), 1142 (m), 1052 (s), 1032 (s), 756 (s), 730 (s), 698 (s) cm<sup>-1</sup>; **<sup>1</sup>H NMR (CDCl<sub>3</sub>, 400 MHz)**: δ 8.22 (1H, s), 7.87 (1H, dd, *J* = 8.0, 1.6 Hz), 7.67 (1H, d, *J* = 8.0 Hz), 7.49–7.41 (3H, m), 7.38–7.36 (2H, m), 7.31–7.22 (7H, m), 6.83 (1H, s), 6.61 (1H, s), 6.12 (1H, d, *J* = 11.2 Hz), 5.58 (1H, d, *J* = 11.2 Hz), 2.58 (3H, s), 2.10 (3H, s), 1.97 (3H, s), 1.59 (9H, s); **<sup>13</sup>C NMR (CDCl<sub>3</sub>, 100 MHz)**: δ 164.8, 158.3, 140.2, 136.3, 135.3, 134.5, 134.3, 134.3, 132.0, 131.9, 130.9, 130.5, 130.4, 130.2, 130.0, 129.7, 129.7, 129.2, 128.9, 128.6, 127.3, 83.3, 76.0, 74.7, 28.3, 21.0, 18.7, 18.1; **HRMS (ES<sup>+</sup>)**: Calcd for C<sub>35</sub>H<sub>37</sub>N<sub>2</sub>O<sub>2</sub>: 517.2855; found: 517.2849. Specific rotation: [α]<sub>D</sub><sup>20</sup> –238.9 (*c* 1.00, CHCl<sub>3</sub>).

### 10.1 Carboxylate imidazolinium salt NHC(C)-1

A 2-dram vial was charged with **S10** (413 mg, 0.68 mmol), and trifluoroacetic acid (1 mL) and CH<sub>2</sub>Cl<sub>2</sub> (3 mL) were added by syringe. The resulting mixture was allowed to stir at 22 °C. After 12 hours, the mixture was neutralized through the addition of saturated aqueous solution of NaHCO<sub>3</sub>, and acidified with 4M HCl solution. The organic layer was separated and the aqueous solution was washed with CH<sub>2</sub>Cl<sub>2</sub> (5 mL) for three times. The combined organic layers were dried over Na<sub>2</sub>SO<sub>4</sub> and concentrated in vacuo. The resulting yellow solid was purified by recrystallization with CH<sub>2</sub>Cl<sub>2</sub> and hexanes to afford 313 mg (0.68 mmol, >98% yield) **NHC(C)-1** as white solid. **IR (neat):** 3035 (w), 1703 (m), 1685 (m), 1618 (s), 1596 (s), 1485 (w), 1455 (w), 1263 (m), 1220 (m), 1180 (s), 1128 (s), 1093 (m), 731(s), 716 (s), 698 (s) cm<sup>-1</sup>; **<sup>1</sup>H NMR (CDCl<sub>3</sub>, 400 MHz)** δ 8.91 (1H, s), 7.91 (1H, d, *J* = 7.8 Hz), 7.57–7.50 (2H, m), 7.47–7.40 (6H, m), 7.41–7.34 (5H, m), 6.92 (1H, s), 6.75 (1H, s), 6.22 (1H, d, *J* = 11.1 Hz), 5.61 (1H, d, *J* = 10.9 Hz), 2.58 (3H, s), 2.22 (3H, s), 2.04 (3H, s); **<sup>13</sup>C NMR (CDCl<sub>3</sub>, 100 MHz)** δ 167.9, 158.6, 140.2, 137.0, 134.8, 134.8, 133.5, 132.2, 131.9, 131.8, 130.6, 130.2, 130.2, 130.1, 129.8, 129.8, 129.6, 129.3, 129.3, 129.1, 128.6, 128.1, 76.2, 74.8, 21.0, 18.9, 18.3; **HRMS (ES+):** Calcd for C<sub>31</sub>H<sub>29</sub>N<sub>2</sub>O<sub>2</sub> [M+H]: 461.2229; found: 461.2220. Specific rotation: [α]<sub>D</sub><sup>20</sup> -210.5 (*c* 1.00, CHCl<sub>3</sub>).

### 10.2 Complex NHC(C)-Ag-1

In a glove box, an oven-dried 6-dram vial was charged with Ag<sub>2</sub>O (100 mg, 0.43 mmol), **NHC(C)-1** (50 mg, 0.11 mmol) and 4 Å molecular sieve (~50 mg). The vial was wrapped in aluminum foil and thf (5 mL) and benzene (5 mL) were added to the solution, resulting in the formation of a black heterogeneous mixture, which was allowed to stir at for one h at 70 °C. The mixture was allowed to cool to 22 °C and filtered through a short plug of celite (4 x 1 cm) and eluted with CH<sub>2</sub>Cl<sub>2</sub>. The volatiles were removed in vacuo to afford 50 mg (0.089 mmol, 81% yield) of **NHC(C)-Ag-1** as white solid. **Mp:** This compound decomposed upon heating. **IR (neat):** 1602 (m), 1477 (s), 1455 (s), 1227 (s), 1193 (s), 904 (s) cm<sup>-1</sup>; **<sup>1</sup>H NMR (CDCl<sub>3</sub>, 400 MHz):** δ 8.26–8.22 (1H, m), 7.47-6.96 (11H, m), 6.82 (1H, t, *J* = 7.2 Hz), 6.62-6.50 (2H, m), 6.39-6.34 (1H, m), 6.07 (1H, bs), 5.14 (1H, d, *J* = 6.8 Hz), 3.76 (3H, s), 2.45 (3H, s), 1.42 (3H, s). **<sup>13</sup>C NMR (CDCl<sub>3</sub>, 100 MHz):** δ 206.0 (C<sub>NHC</sub>, *J*<sup>109</sup><sub>Ag</sub> = 186.5, *J*<sup>107</sup><sub>Ag</sub> = 172.8 Hz), 157.9, 143.5, 140.4, 138.6, 135.9, 135.8, 135.2, 131.2, 130.6, 130.1, 129.8, 129.6, 129.2, 129.1, 129.0, 128.8, 128.7, 128.5, 128.3, 114.1, 113.2, 74.0, 55.3, 19.4. 205.6

## 11 Density Functional Theory (DFT) Calculations

### 11.1 Computational Details

DFT computations<sup>16</sup> were performed with the Gaussian 09/Gaussian 16 suite of programs.<sup>17</sup> Geometries were optimized with the M06–L<sup>18</sup> functional and the def2-SVP basis set<sup>19</sup> in conjunction with the corresponding Coulomb fitting basis set to speed up calculations.<sup>20</sup> The effect of a polar reaction medium (dichloromethane) was approximated by means of the SMD solvation model.<sup>21</sup> Several conformers have been investigated through manual screening, and only the most stable transition state structure is reported. Stationary points were probed through vibrational analysis and Gibbs free energy corrections were performed under standard conditions (298.15 K, 1.0 atm). Transition states have been verified through Intrinsic Reaction Coordinate calculations (IRC) by the use of the L(ocal) Q(uadratic) A(approximation) method,<sup>22, 23</sup> followed by subsequent optimization of the end points with the abovementioned optimization protocol. We also probed the performance of various density functionals through single point energy calculations at the geometries optimized with the level described above by means of the SMD solvation model with DCM as solvent and the larger def2-TZVPP<sup>19</sup> basis set. Several state-of-the-art DFT approaches and benchmark studies have been developed by Truhlar,<sup>24,25</sup> Grimme,<sup>26,27</sup> Head-Gordon,<sup>28,29</sup> et al.<sup>30,31</sup> with emphasis on treatment of dispersion interactions<sup>32</sup> and employed, for example, in modeling the olefin metathesis reaction.<sup>33,34,35,36</sup> A notable impact of dispersion is related to the correct description of ligand association/dissociation steps during a catalytic cycle.<sup>36</sup> Nonetheless, there have been raised concerns regarding the accurate modeling of dispersion interactions in solution.<sup>37,38</sup> In particular, although structural information regarding catalyst precursors is available through x-ray crystallography,<sup>34</sup> there is minimal information regarding their structure and that of related reactive intermediates in solution. Here, we are solely concerned with evaluation with M06–L/def2-TZVPP//M06–L/def2-SVP<sub>CH<sub>2</sub>Cl<sub>2</sub>(SMD)</sub>, while additional free energy values corresponding to MN15/def2-TZVPP//M06–L/def2-SVP<sub>CH<sub>2</sub>Cl<sub>2</sub>(SMD)</sub> and  $\omega$ -B97XD/def2-TZVPP//M06–L/def2-SVP<sub>CH<sub>2</sub>Cl<sub>2</sub>(SMD)</sub> are provided in Schemes S1–S13. A file for convenient viewing of computed geometries with the program Mercury 3.3 is appended as separate “coordinates.xyz” file in Section 13.<sup>39</sup> The “coordinates.xyz” file can be generated by copying all the coordinates in Section 13 into a text file without blank lines and changing the extension to (.xyz).

### 11.2 General Features

The principal features considered here are consistent within the recently reviewed framework of reactions promoted by nucleophilic Cu(I) complexes.<sup>40</sup> Examples that involve enantioselective allylic substitution (EAS) of allylic phosphates, which are promoted by NHC–Cu complexes bearing sulfonate containing NHC ligands have previously been investigated with respect to the function to the sulfonate group.<sup>41,42,43</sup> The latter likely binds an alkali metal cation and assists the displacement of the phosphate anion by establishing a cationic bridge. Enantioselective 1,4- and 1,6-conjugate additions promoted by NHC–Cu complexes that contain an alcohol group are mechanistically related.<sup>44,45,46</sup>

### 11.3 Stereochemical Models

In addition to the previously investigated transformations (see Section 12.2), we provide DFT analyses for a selected range of transformations. These include previously undisclosed investigations regarding EAS involving organoaluminum compounds (see Section 12.3.1), insight into ECA promoted by organozinc and organoaluminum compounds (see Section 12.3.2), proto-boryl additions to aryl alkenes (see Section 12.3.3), and comparison of migratory insertion versus  $\pi$ -allyl formation pathways in boryl substitutions (see Section 12.3.4). In all cases, several conformers have been investigated through manual screening and only the most stable transition state structure is reported. It is worth noting that the dynamic structure present in solution is probably not adequately described by a single geometry. Furthermore, we make assumptions regarding the coordination of cationic Lewis acidic fragments (i.e.,  $\text{AlMe}_2^+$ ,  $\text{ZnMe}^+$  or  $\text{Na}^+$ ) to the sulfonate or phenolate functionality of the ligand on the one hand, and to the Lewis basic functionality of the substrate on the other. Discrete solvent molecules have not been included.

#### 11.3.1 Stereochemical models for EAS

The stereochemical models for EAS between bis[(pinacolato)boryl]methane and di- and trisubstituted allyl phosphates (cf. Scheme 34), a rationale for EAS of alkenyl moieties derived from Al/Cu exchange (cf. Scheme 36), and stereochemical models for EAS with silyl-substituted alkenyl–Al compounds (cf. Scheme 37) are shown in Schemes S4, S5 and S6. This includes additional single point energies obtained with MN15/def2-TZVPP//M06–L/def2-SVP<sub>CH<sub>2</sub>Cl<sub>2</sub>(SMD)</sub> and  $\omega$ –B97XD/def2-TZVPP//M06–L/def2-SVP<sub>CH<sub>2</sub>Cl<sub>2</sub>(SMD)</sub>.

Other notable investigations merit mention:

(i) In EAS involving alkynyl–Al reagents and trisubstituted allyl phosphates containing an ester moiety the Ph ring on the substrate occupies the empty space underneath the NAr unit (**S.I**; Scheme S1a). In the less favorable transition state there is likely repulsion between the rear *ortho*-Me group on the NAr unit and the ester, along with repulsion between the *ortho*-Me group that is oriented to the front and the alkyne moiety. The latter interaction causes the nucleophile to move closer to the substrate's Ph group, as indicated by the contracted  $\text{C}^1\text{–Cu–C}^3\text{–C}^4$  dihedral angle ( $71.7^\circ$  in **S.II** vs.  $81.4^\circ$  in **S.I**). The smaller energy difference between **S.I** and **S.II** (0.2 kcal/mol with M06L) suggests that entropic factors probably play a significant role in achieving high enantioselectivity and that they are not adequately captured by a single transition state geometry. With the sterically more demanding **imid(S)-2c**, the computed energy difference is larger (2.3 kcal/mol with M06L; Scheme S1b). This is probably owing to the stronger repulsion between the ester and the *i*-Pr group on the NAr, which leads to rotation of the substrate, causing a short  $\text{H}\cdots\text{H}$  contact between  $\text{C}\alpha$  and the rear *i*Pr group (1.99 Å). In EAS reactions that generate a quaternary C–alkynyl bond, **S.V** is favored because of the stabilizing C–H/ $\pi$  interaction and because repulsion between  $\text{C}\alpha$  and the rear *ortho* *i*-Pr group is avoided (**S.V**; Scheme S1c). Increased repulsion between  $\text{C}\alpha$  and the rear *ortho* *i*Pr group in **S.VI** leads to rotation of the substrate and forces the nucleophile underneath the NAr ring, as indicated by the contracted  $\text{C}^1\text{–Cu–C}^2\text{–N}$  dihedral angle ( $42.6^\circ$ ).



**Scheme S1.** Stereochemical models for EAS involving alkynyl-Al reagents and trisubstituted allyl phosphates (promoted by **imid(S)-2a**, **imid(S)-2c** and **imid(S)-1b**, respectively; see Schemes 8a–b in the manuscript for methodology). Free energy values correspond to the **M06L/Def2-TZVPP//M06L/Def2-SVP (MN15/Def2-TZVPP//M06L/Def2-SVP and  $\omega$ -B97XD/Def2-TZVPP//M06L/Def2-SVP)** levels of theory.

(ii) In EAS reactions with bis[(pinacolato)boryl]methane, which generate a tertiary carbon stereogenic center, the  $Na^+$  binds simultaneously the sulfonate, the phosphate, and the ester moiety (Scheme S2). Here, **S.VII** is likely favored owing to stabilizing C–H/ $\pi$  interaction, while the B(pin) group can be oriented towards the available space (front). In **S.VIII**,  $Na^+$  is coordinated to the ester also, albeit at the expense of steric pressure caused by the proximity of  $C\alpha$  and the  $NAr^{SO_3}$  ring. This is highlighted by the

side view (space filling model) and is a consequence of the fact that  $C\alpha$  must interact with the transition metal more closely during  $\pi$ -allyl formation, as reflected in the distances to Cu ( $C\alpha$ -Cu = 2.65 Å vs  $C^3$ -Cu = 3.05 Å). Furthermore, there is likely steric repulsion between the ester and *t*-Bu group.



**Scheme S2.** EAS with bis[(pinacolato)boryl]methane that generate a tertiary carbon stereogenic center (promoted by **imid(S)-5a**) (see Scheme 22a in the manuscript for methodology). Free energy values correspond to the **M06L/Def2-TZVPP//M06L/Def2-SVP (MN15/Def2-TZVPP//M06L/Def2-SVP** and  **$\omega$ -B97XD/Def2-TZVPP//M06L/Def2-SVP**) levels of theory.

(iii) In EAS reactions with allenyl-B(pin) or trimethylsilylpropargyl-B(pin) and di- or trisubstituted allylic phosphates, respectively, the substrate probably approaches the Cu-based complex such that steric repulsion between the phenyl substituent and the NAr moiety can be circumvented (Scheme S3). In the energetically most favorable transition states (based on electronic energies) the nucleophile is oriented up and to the right, as drawn, while the sizeable NAr ring is nearly coplanar with the heterocyclic ring ( $C^1-N-C^2-C^3$  dihedral angle =  $28.8^\circ$  in **S.IX**; Scheme S3a). In **S.X**, which leads to the minor enantiomer, there is steric pressure caused by the propinquity of the substrate's phenyl moiety and the *meta* substituent of the NAr. Although we only show the energetically most preferred transition state, there is probably a considerable degree of conformational mobility around the N-Ar bond, which can result in non-negligible repulsion between it and the substrate's Me group in **S.XI**, leading to diminished enantioselectivity for trisubstituted alkene substrates (see Schemes S3b and 30 in the manuscript). For the trimethylsilylpropargyl system, e.r. is high regardless of whether a di- or trisubstituted allylic phosphate is involved (see Scheme 30 in the manuscript). This might arise from the more restricted rotation around the N-Ar bond, partly as the result of favorable dispersion interaction between the  $SiMe_3$  group and the NHC's *i*-Pr substituents, which leads to contraction of the  $C^1-N-C^2-C^3$  dihedral angle ( $9.9^\circ$  in **S.XIII**; Scheme S3c). In the case of trisubstituted alkenes, the substrate's Me group likely associates with the  $\pi$ -cloud of the *m*-aryl substituent in **XIVb**, thus circumventing interaction with the NHC's *i*Pr groups (see Schemes S3d and 30d in the manuscript). In the alternative transition state **XVb**, which leads to the minor enantiomer, steric repulsion between the substrate's Ph group and the NAr ring causes the  $C^1-N-C^2-C^3$  dihedral angle ( $28.3^\circ$ ) to expand,

thus converting an attractive dispersive association between the SiMe<sub>3</sub> group and the NHC's *i*-Pr substituents (see **XIVb**) into a repulsive interaction involving one of the *i*-Pr units (**XVb**).



**Scheme S3.** Stereochemical models for EAS involving allenyl-B(pin) or trimethylsilylpropargyl-B(pin) compounds and di- or trisubstituted allylic phosphates (with catalyst derived from **imid(S)-3a**; see Schemes 13, 19 and 32 in the manuscript for methodology). Electronic energy values correspond to the **M06L/Def2-TZVPP/M06L/Def2-SVP** (**MN15/Def2-TZVPP/M06L/Def2-SVP** and  **$\omega$ -B97XD/Def2-TZVPP/M06L/Def2-SVP**) levels of theory.





**Scheme S6.** Rationale for EAS with silyl-substituted alkenyl–Al compounds (promoted by **imid(S)-1b** and **imid(S)-2c**, respectively; see Schemes 6 and 37 in the manuscript for methodology). Free energy values correspond to the **M06L/Def2-TZVPP//M06L/Def2-SVP (MN15/Def2-TZVPP//M06L/Def2-SVP** and  **$\omega$ -B97XD/Def2-TZVPP//M06L/Def2-SVP**) levels of theory.

### 11.3.2 Stereochemical models for ECA

The stereochemical models for ECA of silyl-substituted alkenyl–Al reagents to cyclic enones (see Scheme 59), models illustrating the effect of **imid(O)-2a** and **imid(S)-2a** in ECA of aryl–Al reagents to cyclic enones (see Scheme 60), as well as stereochemical models for addition of  $\beta$ -alkenyl–Al reagents to acyclic enones (see Scheme 61) are shown in Schemes S8, S9 and S10 including additional single point energies obtained with **MN15/def2-TZVPP//M06–L/def2-SVP<sub>CH2Cl2(SMD)</sub>** and  **$\omega$ -B97XD/def2-TZVPP//M06–L/def2-SVP<sub>CH2Cl2(SMD)</sub>**. Other notable trends merit note:

(i) ECA of (alkyl)<sub>3</sub>–Al compounds to  $\beta$ -ester-substituted cyclic enone promoted by **NHC(S)–Ag-1a** occur with opposite sense of enantioselectivity compared to when (alkyl)<sub>2</sub>–Zn compounds are used (Scheme S7). We attribute this trend to different coordination geometries of the Lewis acidic fragment involving the sulfonate and the Lewis basic site within a substrate. In case of Al-based species, severe steric repulsion is likely avoided in **S.XV**, as indicated by the C<sup>1</sup>–Al–O–C<sup>2</sup> dihedral angle (55.3°; Scheme S7a). In contrast, severe eclipsing interaction might contribute to the destabilization of **S.XVI** (C<sup>1</sup>–Al–O–C<sup>2</sup> dihedral angle of 11.2°). Such coordination geometries might overrule the steric interaction between the rear *ortho*-Me group on the NAr unit and the substrate in the transition state that leads to the major enantiomer (**S.XV**). In the case of a Lewis acidic MeZn<sup>+</sup> fragment (Scheme S7b) the sulfonate group might serve as bidentate ligand to Zn, favoring mode of addition **S.XVII** (O<sup>1</sup>–Zn = 2.21 Å and O<sup>2</sup>–Zn = 2.39 Å). This latter coordination mode is unlikely in **S.XVIII**, which is additionally disfavored due to steric interaction between the rear *o*-Me group on the NAr unit and the substrate. Furthermore, the geometry surrounding the Zn ion in **S.XVII** is nearly planar (sum of angles [O<sup>1</sup>–Zn–C<sup>Me</sup>, O<sup>1</sup>–Zn–O<sup>3</sup>, O<sup>3</sup>–Zn–C<sup>Me</sup>] = 359.0°), suggesting severe eclipsing interaction between Zn–Me and the substrate (as present with Al–Me in **S.XVI**) are absent in **S.XVII**. A stereochemical model involving thf to Zn coordination offers a plausible rationale for the

aforementioned findings (Scheme S7c). Calculations suggest that, while the additional thf molecule causes distortion from planarity, the effect is minor ( $350.9^\circ$  and  $357.1^\circ$  in **S.XIX** and **S.XX**, respectively).



**Scheme S7.** Rationale for ECA of Me<sub>3</sub>Al and Me<sub>2</sub>Zn reagents to  $\beta$ -ester-substituted cyclic enones (with catalyst derived from **imid(S)-1a**; see Schemes 39 and 40 in manuscript for methodology). Free energy values correspond to the **M06L/Def2-TZVPP//M06L/Def2-SVP (MN15/Def2-TZVPP//M06L/Def2-SVP** and  $\omega$ -**B97XD/Def2-TZVPP//M06L/Def2-SVP**) levels of theory.



**Scheme S8.** Rationale for high enantioselectivity in ECA with silyl-substituted alkenyl-Al compounds (promoted by **imid(S)-2a**; see Schemes 51 and 59 in the manuscript for methodology). Free energy values correspond to the **M06L/Def2-TZVPP//M06L/Def2-SVP (MN15/Def2-TZVPP//M06L/Def2-SVP** and  $\omega$ -**B97XD/Def2-TZVPP//M06L/Def2-SVP**) levels of theory.



**Scheme S9.** Rationale for high enantioselectivity in ECA with aryl–Al compounds (with catalysts derived from **imid(O)-2a** and **imid(S)-2a**, respectively; see Scheme 55 and 60 in the manuscript for methodology). Free energy values correspond to the **M06L/Def2-TZVPP//M06L/Def2-SVP** (**MN15/Def2-TZVPP//M06L/Def2-SVP** and  $\omega$ -**B97XD/Def2-TZVPP//M06L/Def2-SVP**) levels of theory.



**Scheme S10.** Rationale for high e.r. in ECA of  $\beta$ -alkenyl–Al compounds (promoted by **imid(S)-3a** and **imid(S)-2c**, respectively; see Schemes 47, 53, and 61 in the manuscript for methodology). Free energy values correspond to the **M06L/Def2-TZVPP//M06L/Def2-SVP** (**MN15/Def2-TZVPP//M06L/Def2-SVP** and  $\omega$ -**B97XD/Def2-TZVPP//M06L/Def2-SVP**) levels of theory.

(ii) It is probable that dispersive interactions impact ECA of  $\alpha$ -alkenyl–Al reagents to acyclic disubstituted enones (Scheme S11a). The expanded  $C^1$ –Cu– $C^2$ –N dihedral angle in **S.XXI** ( $123.5^\circ$ ) is a

result of the nucleophile occupying the open quadrant below the *ortho*-phenyl ring that is at the front. As such, the phenyl substituent of the alkenyl group can point to the front, thus avoiding steric repulsion with the  $\text{NAr}^{\text{SO}_3}$  unit. There is also stabilizing  $\pi$ - $\pi$  stacking interaction between the nucleophile and the substrate's phenyl ring, and C-H/ $\pi$  interaction between the nucleophile and the NHC's *ortho* phenyl moiety. In **S.XXII**, steric factors are likely to dominate, forcing the alkenyl phenyl moiety to be oriented to the left (as drawn), and, as such, it is not conformationally constrained between the ligand and the substrate. For ECA to trisubstituted acyclic enones, a contracted  $\text{C}^1\text{-Cu-C}^2\text{-N}$  dihedral angle can be adopted in **S.XXIII** ( $34.2^\circ$ ) so that the alkenyl phenyl moiety can be oriented to the front (Scheme S11b). Similar to **S.XXI**,  $\pi$ - $\pi$  stacking and C-H/ $\pi$  interactions are stabilizing factors (**S.XXIII**). The minor transition state **S.XXIV** is destabilized owing to steric interaction between the rear *ortho*-Me group on the NAr unit and the substrate, as well as the eclipsing Me groups.



**Scheme S11.** Rationale for high e.r. in ECA of  $\alpha$ -alkenyl-Al compounds (with catalysts derived from **imid(S)-6b** and **NHC(S)-Ag-2a**, respectively; see Schemes 47 and 53 in the manuscript for methodology). Free energy values correspond to the **M06L/Def2-TZVPP//M06L/Def2-SVP** (**MN15/Def2-TZVPP//M06L/Def2-SVP** and  $\omega$ -**B97XD/Def2-TZVPP//M06L/Def2-SVP**) levels of theory.

### 11.3.3 Stereochemical models for proto-boryl addition

The stereochemical models for proto-boryl addition (see Scheme 64) are provided in Scheme S12. This includes additional single point energies obtained with **MN15/def2-TZVPP//M06-L/def2-SVP<sub>CH2Cl2(SMD)</sub>** and  $\omega$ -**B97XD/def2-TZVPP//M06-L/def2-SVP<sub>CH2Cl2(SMD)</sub>**.



**Scheme S12.** Stereochemical models accounting for the high enantioselectivity in proto-boryl additions to aryl alkenes (with catalyst derived from **imid(S)-1b**; see Schemes 64, 66 and 68 for the methodology). Free energy values correspond to the **M06L/Def2-TZVPP//M06L/Def2-SVP** (**MN15/Def2-TZVPP//M06L/Def2-SVP** and  **$\omega$ -B97XD/Def2-TZVPP//M06L/Def2-SVP**) levels of theory.

### 11.3.4 Stereochemical models for boryl substitution

Based on the experimentally obtained KIE (Scheme 72c) we propose a  $\pi$ -allyl mechanism for EAS boryl substitution. The corresponding stereochemical model for reaction of disubstituted allyl carbonates (see Scheme 72a for the methodology) suggests that there is steric repulsion between C $\alpha$  and the rear *ortho* *i*Pr group in the transition state leading to the minor enantiomer (**S.XXVI**, Scheme S13a), causing repulsion between the B(pin) nucleophile and the NAr unit, as indicated by the contracted B-Cu-C<sup>1</sup>-N dihedral angle (31.2°). Similarly, repulsion between C $\alpha$  and the rear *o*-Me group in **S.XXVIII** (leading to rotation of the substrate) is the reason why reactions of trisubstituted allyl carbonates are enantioselective (Scheme S13b). This results in the B(pin) group being conformationally constrained between NAr and Me<sup>a</sup>. The small energy difference (0.7 kcal/mol) is likely the result of a small model substrate being applied and due to the difficulty of accurately capturing the conformational flexibility with a single structure.



**Scheme S13.** Stereochemical models accounting for the high enantioselectivity in boryl substitution with di- and trisubstituted allyl carbonates as electrophiles (with catalysts derived from **imid(S)-2c** and **imid(S)-1a**, respectively; see Scheme 75 for the methodology). Free energy values correspond to the **M06L/Def2-TZVPP//M06L/Def2-SVP** (**MN15/Def2-TZVPP//M06L/Def2-SVP** and  **$\omega$ -B97XD/Def2-TZVPP//M06L/Def2-SVP**) levels of theory.

### 11.3.5 Stereochemical models for silyl substitution

The stereochemical model for enantioselective boryl and silyl substitution reactions, involving  $F_3C$ -alkenes as substrates (cf. Scheme 79b) are provided (Scheme S14). This includes additional single point energies obtained with MN15/def2-TZVPP//M06-L/def2-SVP<sub>CH2Cl2(SMD)</sub> and  $\omega$ -B97XD/def2-TZVPP//M06-L/def2-SVP<sub>CH2Cl2(SMD)</sub>.



**Scheme S14.** Stereochemical models for enantioselective boryl and silyl substitutions involving  $F_3C$ -alkenes (with catalyst derived from imid(S)-3a; see Schemes 76 and 79 for the methodology). Free energy values correspond to the M06L/Def2-TZVPP//M06L/Def2-SVP (MN15/Def2-TZVPP//M06L/Def2-SVP and  $\omega$ -B97XD/Def2-TZVPP//M06L/Def2-SVP) levels of theory.

### 11.3.6 Comparison of migratory insertion versus $\pi$ -allyl formation

The DFT optimized geometries for the energy diagram shown in Scheme 29 (including free energies obtained with M06/def2-TZVPP//M06-L/def2-SVP<sub>DCM(SMD)</sub>) are shown in Scheme S15.



**Scheme S15.** Evaluation of two boryl substitution pathways (promoted by a model NHC–sulfonate ligand; see Scheme 29 in the manuscript). Free energy values correspond to the **M06/Def2-TZVPP//M06L/Def2-SVP** level of theory.

## 11.4 Steric Maps

To gain a greater understanding of the selectivity profiles exhibited by sulfonate NHC ligands, we investigated the steric properties in more detail (Scheme S16).<sup>47,48</sup> We optimized the most commonly applied ligands (in their anionic form) while bound to a neutral Cu–Me fragment. To derive the steric maps and buried volume values ( $\%V_{\text{bur}}$ ), we applied a sphere with a 3.5 Å radius and placed the carbene carbon at a 2.0 Å distance from the Cu center. Ligand **NHC(S)-1b** (with two *ortho* isopropyl groups) covers the largest space of the sphere ( $\%V_{\text{bur}} = 47.2$ ; Scheme S16a). On the other hand, ligands with either a *tert*-butyl (**NHC(S)-3b** or **NHC(S)-4a**) or 2,4,6-triisopropylphenyl substituent at the *meta* position (**NHC(S)-3a** or **NHC(S)-4b**) cover the largest space on the opposite side of the sphere, close to the Cu–Me fragment (parts highlighted in red in the back-right quadrant; Schemes S16b–c). Notably, buried volume values increase by  $\sim 2.5$ – $3.0\%$  when a *tert*-butyl group is changed to a 2,4,6-triisopropylphenyl substituent (Scheme S16b–c). In all cases the front-left quadrant is partly blocked by the C–H bonds of the NAr ring that contains the sulfonate. This is because there is probably some electrostatic attraction between the sulfonate, which resides in the rear-left quadrant (as drawn), and the C–H bonds of the phenyl rings on the NHC backbone; the result is that the sulfonate moves away from the metal center (e.g. **NHC(S)-4a–Cu–Me**; rear view below). Likewise, edge-to-face aromatic interactions might exist between the *ortho* phenyl substituent and phenyl rings on the NHC backbone (see front view).



The abovementioned electrostatic interaction creates an open pocket beneath the sulfonate group (at least when the ligand is in its anionic form; e.g., relevant to Cu–B(pin) additions to alkenes). Comparison with IPr ( $\%V_{\text{bur}} = 53.4$  for **IPr–Cu–Me**; Scheme S16d) shows, that the sulfonate ligands are noticeably smaller ( $\%V_{\text{bur}} = 46.8$  for **NHC(S)-2c–Cu–Me**; Scheme S16a).

It should be noted that these steric maps represent just a snapshot obtained from a single geometry, whereas the situation in solution may be more complex. Notably, the highlighted parts in red are conformationally mobile in ligands bearing a 3,5-disubstituted NAr unit, owing to more facile rotation around the N–Ar bond (Scheme S16b). In contrast, the areas highlighted in red will be more rigid in case of 2,5-disubstitution (Scheme S16c).

## a) NHC ligands bearing a 2,6-disubstituted NAr unit



**Scheme S16a.** Steric maps and buried volumes ( $\%V_{bur}$ ) of commonly applied NHC-sulfonate ligands in their corresponding anionic Cu-Me complexes. Structures have been optimized with M06L/Def2-SVP in dichloromethane as solvent (SMD solvation model).

## b) NHC ligands bearing a 3,5-disubstituted NAr unit



## c) NHC ligands bearing a 2,5-disubstituted NAr unit



## d) representative achiral monodentated NHC ligands



**Scheme S16b-d.** Steric maps and buried volumes (%V<sub>bur</sub>) of commonly applied NHC-sulfonate ligands in their corresponding anionic Cu-Me complexes. Structures have been optimized with M06L/Def2-SVP in dichloromethane as solvent (SMD solvation model).

## 12 Coordinates After Optimization with M06L/Def2SVP<sub>CH2Cl2</sub>(SMD)

110

Scheme\_S1\_S.1 / electronic energy: -5188.84834855 a.u. / lowest freq: -254.54 cm<sup>-1</sup>

|    |           |           |           |
|----|-----------|-----------|-----------|
| C  | -0.319833 | 3.030643  | 1.750614  |
| H  | 0.723630  | 3.341324  | 1.905610  |
| C  | -0.797097 | 2.133914  | 2.901901  |
| H  | -1.695624 | 2.528000  | 3.402170  |
| C  | -0.848052 | 0.874976  | 0.928754  |
| C  | 0.043054  | 2.428189  | -0.704342 |
| C  | -0.913422 | 2.469433  | -1.724749 |
| C  | 1.382107  | 2.721389  | -1.003549 |
| C  | -0.549666 | 2.820037  | -3.021327 |
| H  | -1.950564 | 2.229701  | -1.476438 |
| C  | 1.736275  | 3.099923  | -2.299972 |
| C  | 0.774462  | 3.156952  | -3.303734 |
| H  | -1.307401 | 2.846768  | -3.807442 |
| H  | 2.782156  | 3.314753  | -2.525956 |
| H  | 1.066108  | 3.448343  | -4.315071 |
| C  | -1.559833 | -0.306400 | 2.930164  |
| C  | -0.632090 | -1.092008 | 3.641568  |
| C  | -2.927783 | -0.641348 | 2.856005  |
| C  | -1.101082 | -2.265746 | 4.247913  |
| C  | -3.343319 | -1.830328 | 3.466254  |
| C  | -2.437898 | -2.637946 | 4.151256  |
| H  | -2.779715 | -3.567387 | 4.614032  |
| S  | 2.685197  | 2.592212  | 0.221944  |
| O  | 3.880350  | 2.160301  | -0.641027 |
| O  | 2.336677  | 1.548315  | 1.199049  |
| O  | 2.899170  | 3.940338  | 0.758647  |
| Cu | -1.188677 | -0.656128 | -0.316971 |
| C  | -1.153793 | 4.250509  | 1.453701  |
| C  | -0.530514 | 5.478229  | 1.209841  |
| C  | -2.547975 | 4.159632  | 1.345950  |
| C  | -1.287931 | 6.603196  | 0.880163  |
| H  | 0.560025  | 5.544209  | 1.272781  |
| C  | -3.304746 | 5.281276  | 1.015393  |
| H  | -3.044075 | 3.197563  | 1.513325  |
| C  | -2.675419 | 6.506901  | 0.784112  |
| H  | -0.789581 | 7.557803  | 0.694806  |
| H  | -4.391499 | 5.200061  | 0.934525  |
| H  | -3.269716 | 7.386731  | 0.525717  |
| N  | -0.372204 | 2.079377  | 0.602468  |
| N  | -1.099166 | 0.857082  | 2.240856  |
| C  | 0.580775  | -1.657915 | -0.843530 |
| C  | 1.212530  | -0.928524 | -1.985554 |
| O  | 1.996305  | -0.017487 | -1.844399 |
| O  | 0.840147  | -1.418100 | -3.171073 |
| Al | 5.200200  | 0.870419  | -0.486119 |
| H  | -4.396722 | -2.116655 | 3.404473  |
| C  | -0.496297 | -2.542630 | -1.062465 |
| C  | -3.917227 | 0.267460  | 2.199298  |
| H  | -0.023300 | 1.995350  | 3.671528  |
| C  | 0.808742  | -0.706702 | 3.768349  |
| H  | -0.392545 | -2.899256 | 4.789146  |
| C  | -1.023891 | -3.547347 | -0.138717 |
| H  | -0.848316 | -2.622990 | -2.094248 |
| C  | -0.261773 | -4.097196 | 0.912233  |
| C  | -2.330467 | -4.036570 | -0.345664 |
| C  | 1.086952  | -1.317249 | 0.443952  |
| C  | -4.122069 | -0.697663 | -1.500955 |
| C  | 6.362747  | 1.413974  | 0.993889  |
| C  | 5.844765  | 0.575166  | -2.310830 |
| H  | 5.004507  | 0.401586  | -3.004878 |
| H  | 6.504620  | -0.305649 | -2.397738 |
| H  | 6.414008  | 1.427474  | -2.719163 |
| H  | 7.171264  | 0.693652  | 1.207282  |
| H  | 5.783174  | 1.512091  | 1.929205  |
| H  | 6.852802  | 2.389087  | 0.831807  |
| C  | -0.803935 | -5.079449 | 1.737805  |
| H  | 0.777344  | -3.790836 | 1.053665  |
| C  | -2.869245 | -5.006622 | 0.489340  |
| H  | -2.924073 | -3.626398 | -1.166886 |
| C  | -2.109136 | -5.528777 | 1.539627  |
| H  | -0.195140 | -5.501452 | 2.541172  |
| H  | -3.887977 | -5.362593 | 0.319601  |
| H  | -2.531397 | -6.294348 | 2.195025  |
| C  | -2.963901 | -0.708961 | -1.067682 |
| C  | -5.470081 | -0.684991 | -1.966848 |
| C  | -5.956212 | -1.696508 | -2.822482 |
| C  | -6.359823 | 0.337666  | -1.573502 |

|   |           |           |           |
|---|-----------|-----------|-----------|
| C | -7.275987 | -1.682444 | -3.263576 |
| H | -5.280659 | -2.496297 | -3.136563 |
| C | -7.678067 | 0.345139  | -2.019073 |
| H | -5.998710 | 1.128436  | -0.910665 |
| C | -8.143363 | -0.663414 | -2.865288 |
| H | -7.632238 | -2.475620 | -3.925833 |
| H | -8.350182 | 1.146731  | -1.702210 |
| H | -9.178992 | -0.654901 | -3.213396 |
| H | -3.565567 | 0.656348  | 1.233966  |
| H | -4.131412 | 1.139403  | 2.838949  |
| H | -4.871686 | -0.244861 | 2.022942  |
| H | 1.142006  | -0.006730 | 2.991499  |
| H | 1.462188  | -1.589758 | 3.729464  |
| H | 1.004028  | -0.223501 | 4.739164  |
| C | 1.450589  | -0.816009 | -4.310130 |
| H | 1.012102  | -1.300221 | -5.187221 |
| H | 2.536363  | -0.981824 | -4.297198 |
| H | 1.254823  | 0.263550  | -4.340176 |
| O | 4.372272  | -0.654185 | 0.088274  |
| H | 6.791558  | -2.006033 | 0.398896  |
| C | 6.354697  | -2.979662 | 0.131395  |
| P | 3.894357  | -2.096051 | 0.017815  |
| H | 6.933061  | -3.771701 | 0.618647  |
| H | 6.412608  | -3.117490 | -0.958799 |
| O | 3.767807  | -2.441007 | -1.556799 |
| O | 5.012002  | -3.092095 | 0.600967  |
| O | 2.622098  | -2.450978 | 0.786277  |
| C | 3.310407  | -3.732555 | -1.951454 |
| H | 3.962152  | -4.527922 | -1.559435 |
| H | 3.334203  | -3.765318 | -3.046471 |
| H | 2.280318  | -3.918180 | -1.609616 |
| H | 0.586679  | -1.695662 | 1.332220  |
| H | 1.643801  | -0.381578 | 0.550236  |

110

Scheme\_S1\_S11 / electronic energy: -5188.84776449 a.u. / lowest freq: -248.07 cm-1

|    |           |           |           |
|----|-----------|-----------|-----------|
| C  | 0.762684  | -3.246799 | 0.356848  |
| H  | -0.189566 | -3.776171 | 0.493410  |
| C  | 1.445999  | -3.007657 | 1.711515  |
| H  | 2.436705  | -3.483162 | 1.776474  |
| C  | 0.991353  | -0.926219 | 0.755019  |
| C  | -0.213068 | -1.488947 | -1.254409 |
| C  | 0.471419  | -0.789517 | -2.254796 |
| C  | -1.591025 | -1.733787 | -1.405764 |
| C  | -0.199720 | -0.332064 | -3.386233 |
| H  | 1.540606  | -0.601233 | -2.121745 |
| C  | -2.255401 | -1.285892 | -2.549674 |
| C  | -1.562896 | -0.583987 | -3.535179 |
| H  | 0.348673  | 0.219157  | -4.153506 |
| H  | -3.327617 | -1.462523 | -2.645615 |
| H  | -2.095382 | -0.229670 | -4.420932 |
| C  | 2.098579  | -0.867586 | 2.925301  |
| C  | 1.192901  | -0.380443 | 3.888012  |
| C  | 3.491393  | -0.726383 | 3.059938  |
| C  | 1.720096  | 0.289089  | 4.998713  |
| C  | 3.970622  | -0.044086 | 4.185685  |
| C  | 3.095127  | 0.461441  | 5.143005  |
| H  | 3.489074  | 0.990163  | 6.014640  |
| S  | -2.513959 | -2.563848 | -0.111672 |
| O  | -3.966917 | -2.169426 | -0.434034 |
| O  | -2.081934 | -1.988813 | 1.170980  |
| O  | -2.336620 | -4.008044 | -0.294019 |
| Cu | 1.109049  | 1.009013  | 0.295355  |
| C  | 1.584243  | -3.971010 | -0.678845 |
| C  | 1.067502  | -5.099408 | -1.322321 |
| C  | 2.857672  | -3.505418 | -1.035468 |
| C  | 1.816369  | -5.764660 | -2.294570 |
| H  | 0.067008  | -5.453904 | -1.058152 |
| C  | 3.604105  | -4.166222 | -2.007847 |
| H  | 3.263773  | -2.610973 | -0.550015 |
| C  | 3.085118  | -5.300533 | -2.637569 |
| H  | 1.403013  | -6.647862 | -2.787663 |
| H  | 4.596072  | -3.795997 | -2.278639 |
| H  | 3.671397  | -5.819619 | -3.399680 |
| N  | 0.487454  | -1.846962 | -0.076623 |
| N  | 1.569112  | -1.544546 | 1.783928  |
| C  | -0.475368 | 2.295849  | 0.736993  |
| C  | -0.601783 | 2.584950  | 2.198136  |
| O  | -1.571804 | 2.274401  | 2.850311  |
| O  | 0.453418  | 3.241899  | 2.691820  |
| Al | -5.223233 | -1.377107 | 0.690753  |
| H  | 5.049416  | 0.088743  | 4.303448  |
| C  | 0.495864  | 2.966905  | -0.058411 |
| C  | 4.428620  | -1.296678 | 2.046568  |

|   |           |           |           |
|---|-----------|-----------|-----------|
| H | 0.843527  | -3.376604 | 2.555078  |
| C | -0.277487 | -0.599808 | 3.735184  |
| H | 1.035449  | 0.671253  | 5.760677  |
| C | 0.435271  | 3.221901  | -1.502322 |
| H | 1.198073  | 3.598415  | 0.493805  |
| C | 1.618397  | 3.575715  | -2.182059 |
| C | -0.768975 | 3.193300  | -2.231012 |
| C | -1.375009 | 1.325942  | 0.225555  |
| C | 4.138774  | 1.242477  | -0.579334 |
| C | -5.114898 | -2.132487 | 2.491905  |
| C | -6.887547 | -1.456467 | -0.339345 |
| H | -7.728782 | -0.918414 | 0.130018  |
| H | -7.227806 | -2.500761 | -0.453578 |
| H | -6.780873 | -1.054293 | -1.360939 |
| H | -4.878995 | -3.210729 | 2.472484  |
| H | -6.054101 | -2.032830 | 3.062340  |
| H | -4.323932 | -1.655801 | 3.093965  |
| C | 1.604769  | 3.850781  | -3.543444 |
| H | 2.556812  | 3.615943  | -1.623743 |
| C | -0.778943 | 3.483120  | -3.594571 |
| H | -1.709814 | 2.992013  | -1.714538 |
| C | 0.404922  | 3.800607  | -4.259164 |
| H | 2.535604  | 4.112374  | -4.052147 |
| H | -1.725804 | 3.472358  | -4.140830 |
| H | 0.393300  | 4.023987  | -5.328610 |
| C | 2.949042  | 1.210522  | -0.247101 |
| C | 5.513890  | 1.275855  | -0.955419 |
| C | 6.135358  | 0.145108  | -1.527265 |
| C | 6.292238  | 2.436519  | -0.760163 |
| C | 7.478989  | 0.178142  | -1.888061 |
| H | 5.545863  | -0.761668 | -1.687329 |
| C | 7.635997  | 2.460465  | -1.121058 |
| H | 5.826070  | 3.320536  | -0.318067 |
| C | 8.236306  | 1.333708  | -1.686235 |
| H | 7.940816  | -0.708064 | -2.330648 |
| H | 8.221208  | 3.369294  | -0.959336 |
| H | 9.291546  | 1.356083  | -1.968624 |
| H | 4.066798  | -1.135477 | 1.022122  |
| H | 4.552334  | -2.384355 | 2.175095  |
| H | 5.426992  | -0.847838 | 2.126768  |
| H | -0.661756 | -0.223792 | 2.776450  |
| H | -0.843130 | -0.110267 | 4.537124  |
| H | -0.531404 | -1.671093 | 3.751246  |
| C | 0.364698  | 3.630708  | 4.060203  |
| H | 1.364445  | 3.963046  | 4.354701  |
| H | 0.044931  | 2.792680  | 4.691326  |
| H | -0.350569 | 4.455987  | 4.178255  |
| O | -4.571409 | 0.345295  | 0.765747  |
| H | -5.049215 | 2.643333  | -2.751982 |
| C | -4.469615 | 1.709487  | -2.811195 |
| P | -4.374492 | 1.528473  | -0.188298 |
| H | -3.408175 | 1.957252  | -2.960773 |
| H | -4.824144 | 1.128988  | -3.670486 |
| O | -5.494532 | 2.653089  | 0.047928  |
| O | -4.653865 | 0.904912  | -1.651754 |
| O | -3.053317 | 2.283676  | -0.116147 |
| C | -6.875950 | 2.297929  | 0.054519  |
| H | -7.444362 | 3.227870  | 0.162940  |
| H | -7.112016 | 1.637496  | 0.901299  |
| H | -7.172640 | 1.809230  | -0.885600 |
| H | -1.837352 | 0.623191  | 0.922755  |
| H | -1.275661 | 0.997066  | -0.810457 |

122

Scheme\_S1\_S.III / electronic energy: -5345.97000961 a.u. / lowest freq: -295.85 cm-1

|   |           |           |           |
|---|-----------|-----------|-----------|
| C | -0.786111 | 2.823941  | 1.596312  |
| H | 0.059476  | 3.526384  | 1.562943  |
| C | -0.604971 | 1.819972  | 2.744073  |
| H | -1.349576 | 1.946436  | 3.542786  |
| C | -0.782874 | 0.624313  | 0.749394  |
| C | -0.476420 | 2.356827  | -0.901152 |
| C | -1.486164 | 2.257149  | -1.862738 |
| C | 0.789939  | 2.837997  | -1.276395 |
| C | -1.248789 | 2.647651  | -3.177739 |
| H | -2.459716 | 1.868342  | -1.556215 |
| C | 1.014793  | 3.251868  | -2.591194 |
| C | -0.001979 | 3.159309  | -3.537350 |
| H | -2.045344 | 2.560989  | -3.919952 |
| H | 2.002934  | 3.617751  | -2.875359 |
| H | 0.187892  | 3.476415  | -4.565037 |
| C | -0.774989 | -0.750280 | 2.763331  |
| C | 0.424108  | -1.246999 | 3.323543  |
| C | -1.984119 | -1.483464 | 2.825034  |
| C | 0.388451  | -2.501294 | 3.946043  |

|    |           |           |           |
|----|-----------|-----------|-----------|
| C  | -1.953530 | -2.741465 | 3.438616  |
| C  | -0.782859 | -3.247269 | 3.995516  |
| H  | -0.785585 | -4.232483 | 4.469164  |
| S  | 2.138956  | 2.972319  | -0.103025 |
| O  | 3.359946  | 2.695594  | -0.999231 |
| O  | 2.000581  | 1.914093  | 0.911491  |
| O  | 2.148429  | 4.353680  | 0.387416  |
| Cu | -1.039742 | -0.810192 | -0.598414 |
| C  | -2.076882 | 3.607384  | 1.621974  |
| C  | -2.063301 | 4.974032  | 1.917799  |
| C  | -3.304089 | 2.977577  | 1.373559  |
| C  | -3.254430 | 5.698513  | 1.978295  |
| H  | -1.107484 | 5.474544  | 2.098737  |
| C  | -4.493905 | 3.699785  | 1.435018  |
| H  | -3.325855 | 1.910641  | 1.123551  |
| C  | -4.471994 | 5.062542  | 1.739488  |
| H  | -3.229038 | 6.766447  | 2.208357  |
| H  | -5.445398 | 3.197300  | 1.243747  |
| H  | -5.405513 | 5.628625  | 1.784697  |
| N  | -0.734382 | 1.920828  | 0.422680  |
| N  | -0.762080 | 0.511781  | 2.080949  |
| C  | 0.743720  | -1.494105 | -1.493514 |
| C  | 1.180461  | -0.681562 | -2.668631 |
| O  | 2.180275  | 0.002227  | -2.654217 |
| O  | 0.379747  | -0.821226 | -3.727929 |
| Al | 4.922399  | 1.825028  | -0.483125 |
| H  | -2.868433 | -3.335766 | 3.487306  |
| C  | -0.250592 | -2.487248 | -1.623992 |
| C  | -3.297502 | -0.907807 | 2.329067  |
| H  | 0.395019  | 1.902015  | 3.191730  |
| C  | 1.719568  | -0.460146 | 3.305403  |
| H  | 1.305059  | -2.901177 | 4.387645  |
| C  | -0.504518 | -3.603019 | -0.706668 |
| H  | -0.734643 | -2.556018 | -2.601714 |
| C  | 0.484148  | -4.124630 | 0.151863  |
| C  | -1.769400 | -4.225410 | -0.730424 |
| C  | 1.402928  | -1.168827 | -0.276237 |
| C  | -4.044899 | -0.900357 | -1.604671 |
| C  | 5.463815  | 2.592005  | 1.238199  |
| C  | 6.052861  | 1.832093  | -2.078892 |
| H  | 5.512705  | 1.428235  | -2.952065 |
| H  | 6.962169  | 1.216952  | -1.965584 |
| H  | 6.395939  | 2.842527  | -2.359227 |
| H  | 6.468296  | 2.289154  | 1.579817  |
| H  | 4.759633  | 2.297610  | 2.036453  |
| H  | 5.463808  | 3.695913  | 1.224019  |
| C  | 0.201933  | -5.215182 | 0.970886  |
| H  | 1.493854  | -3.708065 | 0.140989  |
| C  | -2.047211 | -5.306094 | 0.097102  |
| H  | -2.539393 | -3.829923 | -1.398465 |
| C  | -1.062783 | -5.803439 | 0.955461  |
| H  | 0.983295  | -5.612530 | 1.623451  |
| H  | -3.037484 | -5.767086 | 0.072189  |
| H  | -1.280286 | -6.655959 | 1.603494  |
| C  | -2.876737 | -0.945540 | -1.200399 |
| C  | -5.401488 | -0.822940 | -2.038542 |
| C  | -5.885532 | -1.633421 | -3.087029 |
| C  | -6.299494 | 0.077170  | -1.425218 |
| C  | -7.211224 | -1.544183 | -3.501356 |
| H  | -5.204044 | -2.335508 | -3.573671 |
| C  | -7.623504 | 0.160719  | -1.844703 |
| H  | -5.938460 | 0.711355  | -0.610873 |
| C  | -8.086517 | -0.648359 | -2.884317 |
| H  | -7.565338 | -2.181321 | -4.315756 |
| H  | -8.301561 | 0.864874  | -1.355813 |
| H  | -9.126508 | -0.581011 | -3.212328 |
| H  | -3.082327 | -0.304969 | 1.431534  |
| H  | 1.637526  | 0.303965  | 2.517044  |
| C  | 0.794352  | -0.163864 | -4.923601 |
| H  | -0.050493 | -0.215937 | -5.616462 |
| H  | 1.661954  | -0.677582 | -5.359922 |
| H  | 1.061535  | 0.881933  | -4.730378 |
| O  | 4.374610  | 0.112607  | -0.132740 |
| H  | 6.736368  | -0.697577 | 1.159196  |
| C  | 6.745745  | -1.648524 | 0.605108  |
| P  | 4.393147  | -1.364405 | -0.516281 |
| H  | 7.305339  | -2.388559 | 1.187656  |
| H  | 7.254654  | -1.503220 | -0.360043 |
| O  | 5.018679  | -1.431571 | -1.997137 |
| O  | 5.426864  | -2.157189 | 0.432253  |
| O  | 3.086246  | -2.144237 | -0.404653 |
| C  | 4.910161  | -2.629739 | -2.757629 |
| H  | 5.310274  | -3.496352 | -2.209641 |

|   |           |           |           |
|---|-----------|-----------|-----------|
| H | 5.498119  | -2.487068 | -3.670772 |
| H | 3.864174  | -2.831544 | -3.032053 |
| H | 1.108387  | -1.649426 | 0.656866  |
| H | 1.870958  | -0.185308 | -0.183524 |
| C | 1.933049  | 0.247744  | 4.643573  |
| H | 2.108475  | -0.483388 | 5.448797  |
| H | 2.811296  | 0.909531  | 4.602312  |
| H | 1.070362  | 0.857373  | 4.948015  |
| C | 2.939448  | -1.313803 | 2.976341  |
| H | 2.800895  | -1.923715 | 2.072542  |
| H | 3.818586  | -0.672683 | 2.809683  |
| H | 3.198331  | -1.999466 | 3.797961  |
| C | -4.311454 | -1.964598 | 1.920701  |
| H | -5.183858 | -1.492879 | 1.446115  |
| H | -3.895517 | -2.685529 | 1.201261  |
| H | -4.693289 | -2.531740 | 2.783520  |
| C | -3.895866 | 0.023768  | 3.381052  |
| H | -4.826328 | 0.484347  | 3.015283  |
| H | -4.140910 | -0.527332 | 4.302805  |
| H | -3.211995 | 0.837802  | 3.660848  |

122

Scheme\_S1\_S.IV / electronic energy: -5345.96857494 a.u. / lowest freq: -259.11 cm<sup>-1</sup>

|    |           |           |           |
|----|-----------|-----------|-----------|
| C  | 1.395866  | -0.111912 | -3.068825 |
| H  | 0.620926  | 0.337368  | -3.711373 |
| C  | 1.182694  | -1.623885 | -2.918245 |
| H  | 2.082533  | -2.204549 | -3.175914 |
| C  | 0.873174  | -0.642632 | -0.821228 |
| C  | 1.105746  | 1.721400  | -1.329373 |
| C  | 2.261565  | 2.366876  | -0.875997 |
| C  | -0.092940 | 2.447206  | -1.420129 |
| C  | 2.224663  | 3.703648  | -0.494226 |
| H  | 3.186556  | 1.790820  | -0.810663 |
| C  | -0.123715 | 3.794010  | -1.042423 |
| C  | 1.027500  | 4.415842  | -0.571060 |
| H  | 3.132945  | 4.187124  | -0.128023 |
| H  | -1.061604 | 4.349073  | -1.111971 |
| H  | 0.987867  | 5.463683  | -0.265319 |
| C  | 0.633974  | -3.091251 | -0.928088 |
| C  | -0.578092 | -3.749747 | -1.227170 |
| C  | 1.628621  | -3.692928 | -0.125182 |
| C  | -0.770863 | -5.038950 | -0.718055 |
| C  | 1.376221  | -4.978432 | 0.369893  |
| C  | 0.194029  | -5.650462 | 0.073786  |
| H  | 0.025291  | -6.656842 | 0.465359  |
| S  | -1.590790 | 1.788429  | -2.153437 |
| O  | -2.647904 | 2.326464  | -1.155813 |
| O  | -1.578099 | 0.320162  | -2.133803 |
| O  | -1.714966 | 2.434139  | -3.462298 |
| Cu | 0.767446  | -0.184092 | 1.113665  |
| C  | 2.759277  | 0.310518  | -3.553997 |
| C  | 2.895090  | 1.200802  | -4.621886 |
| C  | 3.909640  | -0.148171 | -2.897073 |
| C  | 4.160697  | 1.619936  | -5.036730 |
| H  | 1.998779  | 1.572362  | -5.127572 |
| C  | 5.172394  | 0.269208  | -3.308560 |
| H  | 3.807508  | -0.826524 | -2.042470 |
| C  | 5.299994  | 1.154396  | -4.382419 |
| H  | 4.254979  | 2.316975  | -5.872888 |
| H  | 6.062935  | -0.093553 | -2.788941 |
| H  | 6.290688  | 1.483609  | -4.705031 |
| N  | 1.174051  | 0.345728  | -1.674056 |
| N  | 0.866150  | -1.796387 | -1.490601 |
| C  | -0.994117 | -0.566943 | 2.159729  |
| C  | -0.963666 | -2.003748 | 2.566404  |
| O  | -1.667772 | -2.858112 | 2.073888  |
| O  | -0.074267 | -2.243141 | 3.534026  |
| Al | -4.495978 | 2.137053  | -1.233226 |
| H  | 2.132880  | -5.468566 | 0.988057  |
| C  | -0.239643 | 0.396955  | 2.873621  |
| C  | 2.972529  | -3.041780 | 0.139402  |
| H  | 0.358609  | -1.992795 | -3.544406 |
| C  | -1.669807 | -3.109701 | -2.059243 |
| H  | -1.703868 | -5.564485 | -0.940495 |
| C  | -0.384993 | 1.854004  | 2.821685  |
| H  | 0.359893  | 0.014877  | 3.703275  |
| C  | 0.681325  | 2.650948  | 3.288732  |
| C  | -1.557496 | 2.501001  | 2.381429  |
| C  | -1.769084 | -0.282434 | 1.004869  |
| C  | 3.744866  | 0.503644  | 1.933220  |
| C  | -5.073122 | 2.054647  | -3.097168 |
| C  | -5.183029 | 3.415728  | 0.082381  |
| H  | -6.285724 | 3.452235  | 0.107892  |
| H  | -4.847623 | 4.448069  | -0.116851 |

|   |           |           |           |
|---|-----------|-----------|-----------|
| H | -4.861551 | 3.174252  | 1.110365  |
| H | -4.873753 | 2.980724  | -3.661298 |
| H | -6.153581 | 1.853005  | -3.196425 |
| H | -4.554229 | 1.245513  | -3.639319 |
| C | 0.593757  | 4.036922  | 3.282928  |
| H | 1.591256  | 2.159247  | 3.642413  |
| C | -1.640486 | 3.891548  | 2.380331  |
| H | -2.429828 | 1.914009  | 2.087603  |
| C | -0.566592 | 4.664446  | 2.820927  |
| H | 1.435241  | 4.634642  | 3.641341  |
| H | -2.560267 | 4.373065  | 2.039054  |
| H | -0.636050 | 5.754997  | 2.815740  |
| C | 2.564011  | 0.230826  | 1.689484  |
| C | 5.116728  | 0.820463  | 2.155608  |
| C | 6.110162  | 0.360411  | 1.263845  |
| C | 5.523004  | 1.605255  | 3.255538  |
| C | 7.450569  | 0.674006  | 1.466255  |
| H | 5.810442  | -0.249205 | 0.406658  |
| C | 6.865504  | 1.915931  | 3.450453  |
| H | 4.767507  | 1.969948  | 3.956030  |
| C | 7.835695  | 1.452995  | 2.559261  |
| H | 8.202935  | 0.307370  | 0.763300  |
| H | 7.158275  | 2.526503  | 4.308417  |
| H | 8.888670  | 1.699006  | 2.715827  |
| H | 2.874478  | -1.959260 | -0.039483 |
| H | -1.401359 | -2.054589 | -2.219263 |
| C | 0.022222  | -3.593893 | 3.978597  |
| H | 0.814967  | -3.613424 | 4.731883  |
| H | 0.276738  | -4.264548 | 3.147481  |
| H | -0.924108 | -3.925866 | 4.425539  |
| O | -4.720665 | 0.438524  | -0.559401 |
| H | -7.336304 | 0.719666  | 0.121262  |
| C | -7.308128 | 0.505205  | 1.199999  |
| P | -4.798514 | -0.176798 | 0.843684  |
| H | -7.801571 | -0.460305 | 1.383735  |
| H | -7.855938 | 1.292623  | 1.729339  |
| O | -5.261562 | -1.687704 | 0.556175  |
| O | -5.974821 | 0.500863  | 1.706688  |
| O | -3.564682 | -0.086571 | 1.739529  |
| C | -5.213661 | -2.649334 | 1.608910  |
| H | -5.561465 | -3.599669 | 1.189053  |
| H | -5.874800 | -2.365480 | 2.441921  |
| H | -4.188330 | -2.774938 | 1.985054  |
| H | -2.020120 | -1.111561 | 0.342496  |
| H | -1.747944 | 0.703635  | 0.543363  |
| C | -1.797097 | -3.785079 | -3.421853 |
| H | -2.109535 | -4.836247 | -3.317436 |
| H | -2.552673 | -3.280499 | -4.042111 |
| H | -0.851326 | -3.783552 | -3.983542 |
| C | -3.009830 | -3.119071 | -1.331392 |
| H | -2.917747 | -2.772747 | -0.292333 |
| H | -3.735596 | -2.468072 | -1.840588 |
| H | -3.450403 | -4.128054 | -1.290254 |
| C | 4.013832  | -3.577538 | -0.840880 |
| H | 4.982714  | -3.072544 | -0.707421 |
| H | 4.181233  | -4.656289 | -0.693634 |
| H | 3.705897  | -3.436116 | -1.887706 |
| C | 3.436948  | -3.209232 | 1.579512  |
| H | 4.368409  | -2.650378 | 1.752014  |
| H | 2.692922  | -2.832055 | 2.298033  |
| H | 3.646205  | -4.259921 | 1.832682  |

129

Scheme\_S1\_5.V / electronic energy: -5388.43148220 a.u. / lowest freq: -251.33 cm<sup>-1</sup>

|   |           |           |           |
|---|-----------|-----------|-----------|
| C | 0.509227  | 2.407840  | 1.631796  |
| H | -0.394535 | 2.999043  | 1.830928  |
| C | 1.277019  | 2.957222  | 0.409839  |
| H | 2.337038  | 3.109794  | 0.673817  |
| C | 0.607178  | 0.736714  | -0.045030 |
| C | -0.653850 | 0.137610  | 1.931371  |
| C | -0.002310 | -0.937011 | 2.540823  |
| C | -2.054067 | 0.240435  | 2.037794  |
| C | -0.726229 | -1.911412 | 3.226546  |
| H | 1.083712  | -1.003348 | 2.451214  |
| C | -2.773976 | -0.730255 | 2.734954  |
| C | -2.112261 | -1.809233 | 3.320260  |
| H | -0.200362 | -2.750628 | 3.687542  |
| H | -3.859608 | -0.649240 | 2.802352  |
| H | -2.688986 | -2.568640 | 3.853009  |
| C | 1.838613  | 1.867629  | -1.840070 |
| C | 1.018770  | 2.194842  | -2.943642 |
| C | 3.224656  | 1.637684  | -1.988430 |
| C | 1.616593  | 2.273786  | -4.206999 |
| C | 3.772418  | 1.746430  | -3.272698 |

|    |           |           |           |
|----|-----------|-----------|-----------|
| C  | 2.980722  | 2.059587  | -4.372525 |
| H  | 3.430599  | 2.134822  | -5.365765 |
| S  | -2.920681 | 1.595278  | 1.245522  |
| O  | -2.637713 | 2.810343  | 2.017141  |
| O  | -4.398699 | 1.211805  | 1.432172  |
| O  | -2.540890 | 1.598082  | -0.174918 |
| Cu | 0.805710  | -1.182895 | -0.595972 |
| C  | 1.312137  | 2.312098  | 2.904541  |
| C  | 0.812577  | 2.854625  | 4.092335  |
| C  | 2.545116  | 1.644874  | 2.926285  |
| C  | 1.538171  | 2.748626  | 5.280140  |
| H  | -0.156098 | 3.363308  | 4.082873  |
| C  | 3.271262  | 1.540347  | 4.110041  |
| H  | 2.933791  | 1.192313  | 2.006647  |
| C  | 2.768961  | 2.094312  | 5.290353  |
| H  | 1.137891  | 3.179326  | 6.201152  |
| H  | 4.234048  | 1.023224  | 4.113532  |
| H  | 3.338636  | 2.011690  | 6.219147  |
| N  | 0.105714  | 1.056954  | 1.158367  |
| N  | 1.238342  | 1.802616  | -0.541096 |
| C  | -0.692514 | -2.158959 | -1.684117 |
| H  | -0.765924 | -1.748580 | -2.694204 |
| Al | -5.664607 | 0.478259  | 0.288762  |
| H  | 4.843147  | 1.575924  | -3.410937 |
| C  | 0.318848  | -3.112527 | -1.407302 |
| C  | 4.126508  | 1.282834  | -0.823430 |
| C  | -0.474793 | 2.409207  | -2.811477 |
| H  | 0.997185  | 2.512389  | -5.075627 |
| C  | 1.334626  | -3.387740 | -2.446666 |
| C  | 0.170164  | -4.087510 | -0.282426 |
| C  | 1.710697  | -2.394654 | -3.375116 |
| C  | 1.988992  | -4.629754 | -2.511979 |
| C  | -1.668378 | -1.749418 | -0.747577 |
| C  | -6.022458 | 1.689888  | -1.202004 |
| C  | -7.090444 | -0.130100 | 1.487050  |
| H  | -6.784413 | -0.970095 | 2.134147  |
| H  | -8.003678 | -0.455959 | 0.960716  |
| H  | -7.407316 | 0.680312  | 2.166578  |
| H  | -6.452526 | 2.650498  | -0.870934 |
| H  | -6.737939 | 1.270309  | -1.930197 |
| H  | -5.108414 | 1.937026  | -1.767577 |
| C  | 2.695653  | -2.633656 | -4.325218 |
| H  | 1.250910  | -1.402186 | -3.319890 |
| C  | 2.968875  | -4.872443 | -3.473085 |
| H  | 1.725771  | -5.422822 | -1.809263 |
| C  | 3.329255  | -3.877967 | -4.381224 |
| H  | 2.979707  | -1.838172 | -5.018651 |
| H  | 3.458706  | -5.848476 | -3.507836 |
| H  | 4.105712  | -4.066795 | -5.126214 |
| H  | 3.478071  | 0.940944  | 0.000524  |
| C  | 4.918649  | 2.493048  | -0.334542 |
| C  | 5.079043  | 0.140726  | -1.159074 |
| H  | -0.704963 | 2.567044  | -1.748521 |
| C  | -1.228353 | 1.154554  | -3.233069 |
| C  | -0.962572 | 3.631305  | -3.576094 |
| O  | -4.728011 | -0.955179 | -0.370528 |
| H  | -5.029890 | -5.009496 | 0.838690  |
| C  | -4.454316 | -4.308946 | 1.462163  |
| P  | -4.497779 | -2.466279 | -0.402003 |
| H  | -3.382796 | -4.533575 | 1.355327  |
| H  | -4.747516 | -4.446832 | 2.508282  |
| O  | -5.607887 | -3.206908 | -1.293403 |
| O  | -4.733571 | -2.953828 | 1.117877  |
| O  | -3.159046 | -2.936617 | -0.962726 |
| C  | -6.993198 | -2.965016 | -1.053362 |
| H  | -7.555007 | -3.665226 | -1.680676 |
| H  | -7.271249 | -1.938719 | -1.336535 |
| H  | -7.259230 | -3.141681 | -0.000513 |
| H  | -2.229695 | -0.833056 | -0.947418 |
| H  | -1.542620 | -1.998667 | 0.309103  |
| H  | 5.609630  | -0.195488 | -0.256264 |
| H  | 5.848924  | 0.449059  | -1.882807 |
| H  | 4.554569  | -0.730007 | -1.579228 |
| H  | 5.523508  | 2.234772  | 0.547920  |
| H  | 4.276845  | 3.340931  | -0.055429 |
| H  | 5.609945  | 2.853239  | -1.112949 |
| H  | -0.376107 | 4.530246  | -3.334208 |
| H  | -2.013812 | 3.843088  | -3.329073 |
| H  | -0.914604 | 3.487312  | -4.666744 |
| H  | -0.934052 | 0.302749  | -2.606293 |
| H  | -1.024339 | 0.888958  | -4.283321 |
| H  | -2.314551 | 1.286659  | -3.121786 |
| H  | -2.081673 | 6.068003  | -0.677051 |

|   |           |           |           |
|---|-----------|-----------|-----------|
| C | -1.020095 | 5.809868  | -0.705021 |
| H | -0.439116 | 7.635770  | -1.707013 |
| C | -0.101577 | 6.685762  | -1.285311 |
| C | 0.763965  | 4.251370  | -0.177886 |
| C | 1.248981  | 6.340972  | -1.324491 |
| C | 1.675699  | 5.133386  | -0.772088 |
| H | 1.977161  | 7.018335  | -1.777112 |
| H | 2.738417  | 4.872825  | -0.790053 |
| C | -0.593929 | 4.599623  | -0.160387 |
| H | -1.332930 | 3.922663  | 0.276467  |
| H | 5.624252  | -2.861132 | 4.910702  |
| H | 3.669217  | -2.106408 | 3.585437  |
| C | 5.638972  | -2.957022 | 3.821925  |
| C | 4.540846  | -2.531634 | 3.080537  |
| H | 7.615459  | -3.835622 | 3.767891  |
| C | 6.754060  | -3.503664 | 3.183421  |
| C | 4.531073  | -2.642802 | 1.673144  |
| C | 3.409123  | -2.198115 | 0.914256  |
| C | 6.758895  | -3.623278 | 1.792081  |
| C | 2.435662  | -1.793577 | 0.265591  |
| C | 5.664246  | -3.201356 | 1.043217  |
| H | 7.626508  | -4.052096 | 1.283949  |
| H | 5.671165  | -3.298544 | -0.045663 |
| H | -0.340683 | -4.994455 | -0.648780 |
| H | -0.439627 | -3.697802 | 0.541939  |
| H | 1.138196  | -4.396007 | 0.131103  |

129

Scheme\_S1\_S.VI / electronic energy: -5388.43068169 a.u. / lowest freq: -248.55 cm<sup>-1</sup>

|    |           |           |           |
|----|-----------|-----------|-----------|
| C  | -0.450498 | 2.739216  | 0.966088  |
| H  | -1.399190 | 3.058669  | 0.512571  |
| C  | 0.724359  | 3.129896  | 0.038981  |
| H  | 1.486002  | 3.693895  | 0.603019  |
| C  | 0.652465  | 0.773303  | 0.225168  |
| C  | -1.144869 | 0.435333  | 1.812745  |
| C  | -0.457610 | -0.400880 | 2.702526  |
| C  | -2.552678 | 0.421256  | 1.824358  |
| C  | -1.142558 | -1.214860 | 3.598122  |
| H  | 0.636325  | -0.390463 | 2.683122  |
| C  | -3.234826 | -0.396177 | 2.730402  |
| C  | -2.536227 | -1.207813 | 3.618918  |
| H  | -0.582128 | -1.848478 | 4.289137  |
| H  | -4.325384 | -0.407235 | 2.714475  |
| H  | -3.083875 | -1.837329 | 4.323062  |
| C  | 2.591263  | 1.736501  | -0.946174 |
| C  | 2.676091  | 1.462782  | -2.323792 |
| C  | 3.739926  | 1.982039  | -0.162870 |
| C  | 3.947483  | 1.437964  | -2.909894 |
| C  | 4.985431  | 1.953631  | -0.798080 |
| C  | 5.091532  | 1.686199  | -2.159366 |
| H  | 6.074644  | 1.660790  | -2.636417 |
| S  | -3.516960 | 1.417861  | 0.689111  |
| O  | -4.861389 | 0.675593  | 0.682446  |
| O  | -2.866481 | 1.336771  | -0.631313 |
| O  | -3.669316 | 2.753543  | 1.268173  |
| Cu | 1.068672  | -1.188258 | -0.077592 |
| C  | -0.355522 | 3.333805  | 2.348035  |
| C  | -1.104714 | 4.475016  | 2.654724  |
| C  | 0.512556  | 2.811105  | 3.315809  |
| C  | -0.977452 | 5.092428  | 3.898610  |
| H  | -1.796775 | 4.875822  | 1.909164  |
| C  | 0.635963  | 3.424460  | 4.561418  |
| H  | 1.092406  | 1.909477  | 3.097410  |
| C  | -0.106034 | 4.569874  | 4.854236  |
| H  | -1.567822 | 5.983749  | 4.124391  |
| H  | 1.314508  | 3.004026  | 5.307883  |
| H  | -0.009087 | 5.051190  | 5.830404  |
| N  | -0.376828 | 1.255486  | 0.951352  |
| N  | 1.310890  | 1.805052  | -0.305999 |
| C  | -0.694076 | -2.301202 | -0.254166 |
| H  | -1.147786 | -2.306078 | 0.741951  |
| Al | -5.962012 | 0.103439  | -0.704596 |
| H  | 5.888969  | 2.133082  | -0.207766 |
| C  | 0.333119  | -3.230090 | -0.545320 |
| C  | 3.671151  | 2.266395  | 1.324243  |
| C  | 1.462673  | 1.123915  | -3.161567 |
| H  | 4.037892  | 1.212988  | -3.976122 |
| C  | 0.808660  | -4.154056 | 0.504893  |
| C  | 0.690541  | -3.557559 | -1.959044 |
| C  | 0.648179  | -3.856991 | 1.872162  |
| C  | 1.453683  | -5.358060 | 0.169007  |
| C  | -1.253978 | -1.416191 | -1.200608 |
| C  | -6.321840 | 1.601825  | -1.906113 |
| C  | -7.382545 | -0.861935 | 0.237218  |

|   |           |           |           |
|---|-----------|-----------|-----------|
| H | -6.984598 | -1.632016 | 0.920998  |
| H | -8.106344 | -1.366380 | -0.424845 |
| H | -7.977023 | -0.177013 | 0.866837  |
| H | -6.897654 | 2.406993  | -1.418727 |
| H | -6.895891 | 1.312370  | -2.802603 |
| H | -5.387616 | 2.063247  | -2.268881 |
| C | 1.095277  | -4.728093 | 2.857211  |
| H | 0.195300  | -2.908651 | 2.166549  |
| C | 1.900509  | -6.233046 | 1.157373  |
| H | 1.605532  | -5.625068 | -0.877992 |
| C | 1.723340  | -5.925725 | 2.505025  |
| H | 0.965908  | -4.466901 | 3.910515  |
| H | 2.395196  | -7.163188 | 0.868043  |
| H | 2.079810  | -6.609536 | 3.278809  |
| H | 2.614068  | 2.241879  | 1.623548  |
| C | 4.204160  | 3.656679  | 1.652737  |
| C | 4.379058  | 1.193473  | 2.143364  |
| H | 0.563482  | 1.353901  | -2.566285 |
| C | 1.451059  | -0.372835 | -3.448323 |
| C | 1.387118  | 1.944446  | -4.441326 |
| O | -4.880709 | -1.065556 | -1.613510 |
| H | -3.145982 | -3.737988 | 1.609303  |
| C | -3.548963 | -3.882497 | 0.599358  |
| P | -4.063116 | -2.351741 | -1.470846 |
| H | -4.385472 | -4.594920 | 0.649283  |
| H | -2.760688 | -4.307302 | -0.040462 |
| O | -4.845496 | -3.596999 | -2.114702 |
| O | -4.000557 | -2.615078 | 0.123167  |
| O | -2.682196 | -2.386189 | -2.115415 |
| C | -6.248266 | -3.744605 | -1.897934 |
| H | -6.500064 | -3.713749 | -0.827389 |
| H | -6.532443 | -4.724115 | -2.297325 |
| H | -6.814185 | -2.966539 | -2.429518 |
| H | -0.768409 | -1.245122 | -2.160662 |
| H | -1.877848 | -0.586557 | -0.857557 |
| H | 4.316597  | 1.423808  | 3.218129  |
| H | 5.447302  | 1.116875  | 1.886502  |
| H | 3.931626  | 0.201000  | 1.985883  |
| H | 4.062221  | 3.888977  | 2.719073  |
| H | 3.695695  | 4.441830  | 1.072397  |
| H | 5.281341  | 3.739388  | 1.440810  |
| H | 1.442103  | 3.024097  | -4.237262 |
| H | 0.442152  | 1.754901  | -4.971736 |
| H | 2.202059  | 1.696560  | -5.138657 |
| H | 1.472656  | -0.950868 | -2.508660 |
| H | 2.333645  | -0.681684 | -4.031252 |
| H | 0.556585  | -0.669560 | -4.018050 |
| H | 1.598990  | 6.509627  | -3.061060 |
| H | -0.469479 | 6.027769  | -4.365514 |
| C | 0.925813  | 5.708385  | -2.746724 |
| C | -0.231747 | 5.438799  | -3.476212 |
| H | 2.127092  | 5.173550  | -1.030494 |
| C | 1.222160  | 4.958862  | -1.607830 |
| C | -1.086549 | 4.413699  | -3.066076 |
| C | 0.366285  | 3.935071  | -1.185018 |
| C | -0.790194 | 3.664007  | -1.929078 |
| H | -1.469066 | 2.864301  | -1.615095 |
| H | -1.994381 | 4.196732  | -3.634566 |
| H | 9.416448  | -2.804687 | -0.399142 |
| H | 8.254220  | -2.837232 | 1.807167  |
| C | 8.340440  | -2.623525 | -0.341700 |
| C | 7.688196  | -2.641240 | 0.892700  |
| H | 8.105944  | -2.356423 | -2.473932 |
| C | 7.605345  | -2.372206 | -1.502224 |
| C | 6.317787  | -2.411254 | 0.970551  |
| H | 5.812795  | -2.425894 | 1.939821  |
| C | 6.234855  | -2.141826 | -1.433414 |
| C | 5.560367  | -2.154804 | -0.192821 |
| H | 5.663707  | -1.944993 | -2.344543 |
| C | 4.159174  | -1.905553 | -0.117328 |
| C | 2.949444  | -1.652984 | -0.043467 |
| H | 0.330365  | -2.820574 | -2.681909 |
| H | 0.220150  | -4.515530 | -2.236763 |
| H | 1.773040  | -3.680894 | -2.097525 |

141

Scheme\_S2\_S.VII / electronic energy: -5638.16611106 a.u. / lowest freq: -208.80 cm-1

|   |           |           |           |
|---|-----------|-----------|-----------|
| C | -1.691561 | -2.916424 | -0.723052 |
| H | -2.302365 | -2.580663 | -1.572332 |
| C | -2.365824 | -2.511578 | 0.608012  |
| H | -2.344976 | -3.360140 | 1.313269  |
| C | -0.357470 | -1.294413 | 0.353398  |
| C | 0.540924  | -2.168723 | -1.719235 |
| C | 1.840388  | -2.549320 | -1.364279 |

|    |           |           |           |
|----|-----------|-----------|-----------|
| C  | 0.266646  | -1.822941 | -3.056178 |
| C  | 2.850583  | -2.623456 | -2.318755 |
| H  | 2.046703  | -2.796929 | -0.320475 |
| C  | 1.282155  | -1.922409 | -4.009786 |
| C  | 2.565481  | -2.328868 | -3.650645 |
| H  | 3.854568  | -2.922909 | -2.011538 |
| H  | 1.056434  | -1.639903 | -5.040137 |
| H  | 3.346496  | -2.393676 | -4.412103 |
| C  | -1.756487 | -0.634366 | 2.246429  |
| C  | -2.452478 | 0.537870  | 1.909666  |
| C  | -1.461757 | -0.944282 | 3.592864  |
| C  | -2.893385 | 1.463967  | 2.857581  |
| C  | -1.911766 | 0.002883  | 4.529957  |
| C  | -2.600446 | 1.161138  | 4.192112  |
| H  | -2.909669 | 1.832792  | 4.995405  |
| S  | -1.324005 | -1.170379 | -3.598057 |
| O  | -1.020470 | -0.372010 | -4.821953 |
| O  | -1.768712 | -0.266964 | -2.491860 |
| O  | -2.206503 | -2.327452 | -3.834727 |
| Cu | 1.194527  | -0.060783 | 0.584957  |
| C  | -1.443770 | -4.394181 | -0.875113 |
| C  | -2.219965 | -5.138593 | -1.769208 |
| C  | -0.458611 | -5.045880 | -0.121292 |
| C  | -2.026240 | -6.514368 | -1.897837 |
| H  | -2.974748 | -4.627542 | -2.372986 |
| C  | -0.259812 | -6.418379 | -0.254867 |
| H  | 0.162270  | -4.468529 | 0.570974  |
| C  | -1.046359 | -7.156738 | -1.141856 |
| H  | -2.639869 | -7.085277 | -2.599012 |
| H  | 0.514757  | -6.915347 | 0.334440  |
| H  | -0.889769 | -8.233136 | -1.246835 |
| N  | -0.440744 | -2.125305 | -0.694343 |
| N  | -1.426989 | -1.472628 | 1.132151  |
| C  | 1.183961  | 1.699748  | -0.545345 |
| C  | 1.555333  | 1.505052  | -1.970026 |
| O  | 0.764326  | 1.619084  | -2.888955 |
| O  | 2.849984  | 1.259235  | -2.166040 |
| Na | -1.345864 | 1.720739  | -3.799435 |
| C  | 2.193087  | 1.712337  | 0.483069  |
| C  | 2.088284  | 2.389065  | 1.790062  |
| H  | 3.219750  | 1.636283  | 0.114821  |
| C  | 3.160757  | 3.205374  | 2.193728  |
| C  | 1.002795  | 2.244216  | 2.678736  |
| C  | -0.181626 | 1.933027  | -0.320584 |
| C  | 3.129863  | 3.886893  | 3.407678  |
| H  | 4.028161  | 3.302021  | 1.535809  |
| C  | 0.975424  | 2.921108  | 3.894600  |
| H  | 0.191778  | 1.547439  | 2.438568  |
| C  | 2.034144  | 3.754510  | 4.260702  |
| H  | 3.972727  | 4.521711  | 3.691857  |
| H  | 0.125131  | 2.784901  | 4.568069  |
| H  | 2.011751  | 4.284912  | 5.215525  |
| C  | 2.573579  | -0.929179 | 1.775211  |
| C  | 3.282922  | 1.229452  | -3.525992 |
| H  | 4.329368  | 0.911000  | -3.512936 |
| H  | 3.206610  | 2.231564  | -3.970314 |
| H  | 2.681562  | 0.531547  | -4.120969 |
| O  | -2.468996 | 3.044711  | -2.314405 |
| H  | -3.897094 | 5.406175  | -2.752763 |
| C  | -3.023062 | 6.069356  | -2.666508 |
| P  | -1.440712 | 4.094669  | -1.984422 |
| H  | -3.359301 | 7.048833  | -2.305597 |
| H  | -2.580337 | 6.199224  | -3.667088 |
| O  | -0.610977 | 4.258751  | -3.403900 |
| O  | -2.077145 | 5.570736  | -1.735111 |
| O  | -0.460573 | 3.910695  | -0.824683 |
| C  | 0.593914  | 5.000839  | -3.424664 |
| H  | 0.419441  | 6.061860  | -3.182517 |
| H  | 1.008761  | 4.940003  | -4.438606 |
| H  | 1.332940  | 4.599202  | -2.713464 |
| H  | -0.554554 | 2.128439  | 0.682452  |
| H  | -0.914134 | 1.586735  | -1.051634 |
| C  | -3.683308 | 2.699852  | 2.429430  |
| C  | -5.029904 | 2.240436  | 1.859380  |
| H  | -4.894823 | 1.587280  | 0.984186  |
| H  | -5.616720 | 1.681640  | 2.604752  |
| H  | -5.631940 | 3.104409  | 1.537941  |
| C  | -2.915757 | 3.457975  | 1.343648  |
| H  | -1.921165 | 3.779269  | 1.689621  |
| H  | -2.779897 | 2.857292  | 0.433272  |
| H  | -3.463953 | 4.363964  | 1.041723  |
| C  | -3.933734 | 3.642828  | 3.602569  |
| H  | -4.478072 | 4.534617  | 3.259496  |

|   |           |           |           |
|---|-----------|-----------|-----------|
| H | -4.541224 | 3.177675  | 4.392895  |
| H | -2.994737 | 3.990236  | 4.060507  |
| C | -3.795409 | -2.041089 | 0.509046  |
| C | -4.699301 | -2.393441 | 1.518576  |
| C | -4.238626 | -1.232547 | -0.546823 |
| C | -6.022074 | -1.953431 | 1.477902  |
| H | -4.360987 | -3.026468 | 2.344801  |
| C | -5.563200 | -0.799644 | -0.590577 |
| H | -3.542012 | -0.930161 | -1.335791 |
| C | -6.458233 | -1.157799 | 0.418937  |
| H | -6.715117 | -2.240612 | 2.272492  |
| H | -5.897302 | -0.171275 | -1.420138 |
| H | -7.495450 | -0.815499 | 0.380497  |
| C | -0.720089 | -2.165103 | 4.168601  |
| H | -2.657437 | 0.703564  | 0.847579  |
| H | -1.713303 | -0.176923 | 5.589067  |
| C | 0.478035  | -1.668603 | 4.991479  |
| C | -0.183413 | -3.158102 | 3.141877  |
| C | -1.676922 | -2.930142 | 5.093829  |
| H | -2.046488 | -2.310521 | 5.923057  |
| H | -1.165142 | -3.797609 | 5.537535  |
| H | -2.553515 | -3.309542 | 4.547553  |
| H | 1.186679  | -1.102868 | 4.368656  |
| H | 1.024861  | -2.522329 | 5.419441  |
| H | 0.182771  | -1.021368 | 5.828906  |
| H | 0.512037  | -2.696605 | 2.430166  |
| H | -0.981218 | -3.658232 | 2.579025  |
| H | 0.369696  | -3.951641 | 3.666467  |
| H | 6.745245  | -2.701959 | -0.939405 |
| C | 6.982539  | -2.052984 | -0.084241 |
| H | 7.973281  | -1.612862 | -0.269125 |
| H | 7.923650  | -0.851011 | 2.218197  |
| H | 5.348780  | -0.967722 | -2.011299 |
| C | 5.930839  | -0.975930 | 0.064238  |
| C | 5.709617  | -0.256627 | -1.254833 |
| H | 6.635471  | 0.196646  | -1.636665 |
| C | 6.170704  | 0.018985  | 1.248495  |
| H | 7.878716  | 1.102654  | 0.469629  |
| C | 6.873287  | 1.304220  | 0.867358  |
| H | 4.953773  | 0.534039  | -1.151150 |
| H | 6.315399  | 1.874137  | 0.113230  |
| H | 6.990614  | 1.947634  | 1.750862  |
| H | 7.050918  | -2.689731 | 0.806592  |
| H | 6.376218  | -1.577493 | 2.716446  |
| O | 4.674215  | -1.593776 | 0.433232  |
| C | 6.866974  | -0.636205 | 2.430458  |
| H | 6.828627  | 0.036311  | 3.298526  |
| B | 4.011903  | -0.728777 | 1.287631  |
| O | 4.822194  | 0.328215  | 1.666004  |
| H | 2.266161  | -1.983588 | 1.815363  |
| H | 2.369167  | -0.438030 | 2.739267  |

141

Scheme\_S2\_S\_VIII / electronic energy: -5638.16130781 a.u. / lowest freq: -250.09 cm<sup>-1</sup>

|    |           |           |           |
|----|-----------|-----------|-----------|
| C  | 2.067406  | 0.938313  | 2.386721  |
| H  | 1.670027  | 1.798922  | 2.945663  |
| C  | 2.927079  | 1.411896  | 1.194976  |
| H  | 3.935789  | 0.973670  | 1.253503  |
| C  | 1.053807  | 0.211876  | 0.373373  |
| C  | -0.101587 | -0.372055 | 2.438787  |
| C  | -0.208531 | -1.766905 | 2.385774  |
| C  | -1.038988 | 0.365690  | 3.184844  |
| C  | -1.223859 | -2.425961 | 3.076536  |
| H  | 0.509651  | -2.319046 | 1.771568  |
| C  | -2.042026 | -0.306773 | 3.885477  |
| C  | -2.132545 | -1.696216 | 3.841070  |
| H  | -1.302797 | -3.514347 | 3.020041  |
| H  | -2.780503 | 0.280903  | 4.433851  |
| H  | -2.928701 | -2.204952 | 4.388618  |
| C  | 2.524507  | 1.226166  | -1.297054 |
| C  | 1.675882  | 2.233771  | -1.787332 |
| C  | 3.629397  | 0.770714  | -2.042666 |
| C  | 1.884081  | 2.869928  | -3.007504 |
| C  | 3.831499  | 1.440292  | -3.266264 |
| C  | 3.006108  | 2.450137  | -3.737086 |
| H  | 3.240086  | 2.913202  | -4.699455 |
| S  | -1.121827 | 2.168318  | 3.136986  |
| O  | -2.523476 | 2.496221  | 3.521981  |
| O  | -0.910125 | 2.520311  | 1.694802  |
| O  | -0.088458 | 2.685384  | 4.051546  |
| Cu | -0.289278 | -0.618467 | -0.901700 |
| C  | 2.784493  | 0.026380  | 3.349285  |
| C  | 3.128114  | 0.486203  | 4.624144  |
| C  | 3.130442  | -1.281266 | 2.979224  |

|    |           |           |           |
|----|-----------|-----------|-----------|
| C  | 3.823442  | -0.337737 | 5.510477  |
| H  | 2.843426  | 1.499190  | 4.923464  |
| C  | 3.823881  | -2.103991 | 3.864470  |
| H  | 2.844447  | -1.658553 | 1.990903  |
| C  | 4.175094  | -1.632492 | 5.131455  |
| H  | 4.086432  | 0.033166  | 6.504130  |
| H  | 4.091285  | -3.121197 | 3.567251  |
| H  | 4.717140  | -2.279418 | 5.825536  |
| N  | 0.941914  | 0.251785  | 1.708191  |
| N  | 2.215303  | 0.789884  | 0.030094  |
| C  | -2.340531 | -0.073850 | -0.981814 |
| C  | -2.587541 | 1.273553  | -1.554280 |
| O  | -2.731109 | 2.288880  | -0.893874 |
| O  | -2.698843 | 1.262604  | -2.885106 |
| Na | -3.173908 | 3.100517  | 1.240036  |
| C  | -1.985460 | -1.181620 | -1.838078 |
| C  | -2.336610 | -2.599074 | -1.644729 |
| H  | -1.852834 | -0.911974 | -2.889826 |
| C  | -1.862748 | -3.535407 | -2.586998 |
| C  | -3.180826 | -3.074545 | -0.619845 |
| C  | -2.547138 | -0.180269 | 0.407404  |
| C  | -2.196654 | -4.881790 | -2.502961 |
| H  | -1.221920 | -3.189568 | -3.401533 |
| C  | -3.512654 | -4.426580 | -0.539107 |
| H  | -3.637822 | -2.378952 | 0.086274  |
| C  | -3.020877 | -5.339319 | -1.472104 |
| H  | -1.809457 | -5.579888 | -3.249815 |
| H  | -4.180003 | -4.764951 | 0.257829  |
| H  | -3.286943 | -6.397169 | -1.404595 |
| C  | 0.881372  | -1.706889 | -2.102107 |
| C  | -3.196344 | 2.456017  | -3.485976 |
| H  | -3.231656 | 2.266635  | -4.562961 |
| H  | -2.548748 | 3.317184  | -3.280295 |
| H  | -4.205890 | 2.672642  | -3.110774 |
| O  | -5.146168 | 2.101469  | 1.008376  |
| H  | -7.908984 | 1.790998  | 1.555831  |
| C  | -7.960713 | 0.987125  | 0.806324  |
| P  | -5.380052 | 0.716497  | 0.477219  |
| H  | -8.058184 | 1.443830  | -0.191865 |
| H  | -8.854968 | 0.382633  | 0.999653  |
| O  | -5.453277 | 0.844217  | -1.155307 |
| O  | -6.837295 | 0.124531  | 0.886860  |
| O  | -4.432502 | -0.441951 | 0.847665  |
| C  | -5.704552 | -0.318839 | -1.924457 |
| H  | -5.665312 | -0.035607 | -2.984029 |
| H  | -6.701575 | -0.737506 | -1.712314 |
| H  | -4.953222 | -1.104521 | -1.740809 |
| H  | -2.459079 | 0.726002  | 1.001308  |
| H  | -2.298034 | -1.099425 | 0.930636  |
| C  | 0.953524  | 3.953580  | -3.545623 |
| C  | 1.767695  | 5.171092  | -3.993084 |
| H  | 2.343974  | 5.598957  | -3.158434 |
| H  | 2.475132  | 4.931605  | -4.799518 |
| H  | 1.100802  | 5.959301  | -4.374194 |
| C  | -0.049049 | 4.408388  | -2.489007 |
| H  | -0.700056 | 3.591636  | -2.146179 |
| H  | 0.451764  | 4.822036  | -1.600322 |
| H  | -0.700861 | 5.195770  | -2.895629 |
| C  | 0.196202  | 3.375919  | -4.747325 |
| H  | -0.516817 | 4.108923  | -5.156500 |
| H  | 0.880912  | 3.092109  | -5.560784 |
| H  | -0.370224 | 2.474595  | -4.466234 |
| C  | 3.090450  | 2.901830  | 1.019547  |
| C  | 4.300700  | 3.395841  | 0.517614  |
| C  | 2.039285  | 3.796067  | 1.255797  |
| C  | 4.460226  | 4.753727  | 0.245377  |
| H  | 5.126427  | 2.702473  | 0.331667  |
| C  | 2.201638  | 5.155708  | 0.991101  |
| H  | 1.078164  | 3.428464  | 1.626709  |
| C  | 3.407340  | 5.638410  | 0.479932  |
| H  | 5.411083  | 5.121838  | -0.147613 |
| H  | 1.372982  | 5.843407  | 1.179302  |
| H  | 3.528035  | 6.703991  | 0.268990  |
| H  | 0.845216  | 2.526643  | -1.139910 |
| C  | 4.615597  | -0.368957 | -1.716194 |
| H  | 4.682631  | 1.149445  | -3.886416 |
| C  | 4.287539  | -1.198236 | -0.475703 |
| C  | 6.016363  | 0.227900  | -1.532614 |
| C  | 4.646560  | -1.351442 | -2.899421 |
| H  | 4.405338  | -0.639315 | 0.459962  |
| H  | 4.998452  | -2.037220 | -0.415847 |
| H  | 3.277238  | -1.627327 | -0.499342 |
| H  | 6.051041  | 0.921597  | -0.679017 |

|   |           |           |           |
|---|-----------|-----------|-----------|
| H | 6.355714  | 0.778591  | -2.421986 |
| H | 6.750733  | -0.568523 | -1.337625 |
| H | 3.663349  | -1.821679 | -3.059927 |
| H | 5.368331  | -2.157286 | -2.697075 |
| H | 4.948999  | -0.881510 | -3.844858 |
| H | 0.525256  | -1.765234 | -3.141112 |
| H | 1.765991  | -1.052154 | -2.090901 |
| H | 2.362404  | -4.564363 | 2.106942  |
| C | 2.693220  | -4.939555 | 1.127587  |
| H | 2.899509  | -6.013967 | 1.240384  |
| H | 4.017636  | -5.904056 | -1.105127 |
| H | -0.000577 | -4.655966 | 1.509083  |
| C | 1.619253  | -4.700147 | 0.089391  |
| C | 0.271616  | -5.189080 | 0.588080  |
| H | 0.286810  | -6.263098 | 0.820898  |
| C | 1.954163  | -5.229682 | -1.342312 |
| H | 1.835460  | -7.358477 | -0.971079 |
| C | 1.412036  | -6.606604 | -1.652825 |
| H | -0.519514 | -5.009895 | -0.154715 |
| H | 0.318429  | -6.647344 | -1.571774 |
| H | 1.682405  | -6.898930 | -2.677144 |
| H | 3.633642  | -4.433525 | 0.872015  |
| H | 3.846297  | -4.157578 | -1.409980 |
| O | 1.499948  | -3.273681 | -0.138434 |
| C | 3.439272  | -5.149356 | -1.656142 |
| H | 3.600075  | -5.319308 | -2.729909 |
| B | 1.201195  | -3.078427 | -1.478125 |
| O | 1.292732  | -4.257746 | -2.189513 |

149

Scheme\_S3\_S.IX / electronic energy: -5695.09120238 a.u. / lowest freq: -189.12 cm<sup>-1</sup>

|    |           |           |           |
|----|-----------|-----------|-----------|
| C  | -0.548263 | 3.344496  | 0.030816  |
| H  | -1.027076 | 3.649028  | -0.910280 |
| C  | 0.845426  | 2.727471  | -0.244508 |
| H  | 1.610600  | 3.275599  | 0.328887  |
| C  | -0.528541 | 1.089384  | 0.751720  |
| C  | -2.630840 | 2.248676  | 1.039043  |
| C  | -2.878191 | 2.067321  | 2.405698  |
| C  | -3.712902 | 2.464674  | 0.167038  |
| C  | -4.176912 | 2.100224  | 2.905599  |
| H  | -2.027102 | 1.903118  | 3.071816  |
| C  | -5.012632 | 2.500065  | 0.679304  |
| C  | -5.247484 | 2.321901  | 2.040657  |
| H  | -4.348118 | 1.955637  | 3.974513  |
| H  | -5.840938 | 2.657280  | -0.014350 |
| H  | -6.270315 | 2.350729  | 2.423278  |
| S  | -3.503196 | 2.700335  | -1.602937 |
| O  | -4.833023 | 2.390479  | -2.208605 |
| O  | -2.500140 | 1.677949  | -2.035383 |
| O  | -3.072193 | 4.098383  | -1.783864 |
| Cu | -1.298793 | -0.556838 | 1.607119  |
| C  | -0.563622 | 4.502637  | 0.994882  |
| C  | -1.262291 | 5.671066  | 0.674711  |
| C  | 0.082708  | 4.411439  | 2.235927  |
| C  | -1.300792 | 6.739131  | 1.572644  |
| H  | -1.785300 | 5.730615  | -0.283776 |
| C  | 0.042932  | 5.476318  | 3.132187  |
| H  | 0.618038  | 3.494245  | 2.505815  |
| C  | -0.647919 | 6.644572  | 2.800683  |
| H  | -1.847639 | 7.648356  | 1.311289  |
| H  | 0.551243  | 5.395283  | 4.096059  |
| H  | -0.678387 | 7.479898  | 3.504565  |
| N  | -1.285281 | 2.177878  | 0.587016  |
| N  | 0.709350  | 1.362572  | 0.304571  |
| C  | -2.622285 | -2.142169 | 1.662597  |
| C  | -3.525631 | -2.131508 | 2.809027  |
| C  | -3.221283 | -2.917573 | 3.938051  |
| C  | -4.699424 | -1.353914 | 2.841349  |
| C  | -4.050788 | -2.919119 | 5.055531  |
| C  | -5.527355 | -1.357441 | 3.959249  |
| C  | -5.206591 | -2.136029 | 5.073698  |
| H  | -3.794320 | -3.536884 | 5.919536  |
| H  | -6.434048 | -0.746462 | 3.960271  |
| H  | -5.858464 | -2.136775 | 5.950365  |
| C  | -2.818944 | -1.408694 | 0.463343  |
| C  | -2.030191 | -1.635140 | -0.674460 |
| H  | -1.975203 | -0.878068 | -1.459222 |
| H  | -1.188651 | -2.326568 | -0.610712 |
| H  | -4.972455 | -0.743142 | 1.977530  |
| H  | -3.624184 | -0.668263 | 0.389563  |
| P  | -3.774493 | -2.295742 | -2.930167 |
| O  | -4.865919 | -1.264704 | -2.225658 |
| O  | -3.127212 | -1.409262 | -3.960526 |
| O  | -4.689699 | -3.475757 | -3.558684 |

|    |           |           |           |
|----|-----------|-----------|-----------|
| O  | -2.966642 | -2.995988 | -1.835490 |
| Na | -4.013950 | 0.609085  | -3.475506 |
| H  | -1.921091 | -2.986203 | 1.615225  |
| H  | -2.317822 | -3.533599 | 3.926559  |
| C  | -5.784672 | -1.747492 | -1.257299 |
| H  | -6.161692 | -0.887650 | -0.688600 |
| H  | -6.637837 | -2.251760 | -1.737131 |
| H  | -5.306069 | -2.456564 | -0.563801 |
| C  | -5.458742 | -3.194182 | -4.719957 |
| H  | -6.050682 | -4.088915 | -4.945030 |
| H  | -6.149911 | -2.351489 | -4.559306 |
| H  | -4.817620 | -2.966437 | -5.583871 |
| C  | 1.767458  | 0.435457  | 0.218879  |
| C  | 3.095698  | 0.876268  | 0.190802  |
| C  | 1.492767  | -0.927983 | 0.110561  |
| C  | 4.142446  | -0.044201 | 0.065314  |
| C  | 2.521953  | -1.862841 | -0.001562 |
| C  | 3.845608  | -1.412130 | -0.021043 |
| H  | 4.661024  | -2.134091 | -0.134840 |
| H  | 0.457448  | -1.268393 | 0.070586  |
| H  | 3.327301  | 1.941899  | 0.262760  |
| C  | 2.163147  | -3.300770 | -0.164815 |
| C  | 1.873829  | -4.086246 | 0.977129  |
| C  | 2.042355  | -3.841718 | -1.462958 |
| C  | 1.489119  | -5.418891 | 0.794000  |
| C  | 1.654135  | -5.182093 | -1.598831 |
| C  | 1.381809  | -5.965651 | -0.483442 |
| H  | 1.266371  | -6.041258 | 1.664294  |
| H  | 1.552343  | -5.611718 | -2.599993 |
| H  | 1.076628  | -7.007994 | -0.607448 |
| C  | 5.558343  | 0.426910  | 0.030022  |
| C  | 6.070976  | 1.042401  | -1.141646 |
| C  | 6.378770  | 0.255894  | 1.167247  |
| C  | 7.403129  | 1.470780  | -1.143338 |
| C  | 7.704758  | 0.708507  | 1.119582  |
| C  | 8.216169  | 1.307875  | -0.023769 |
| H  | 7.819245  | 1.941619  | -2.036574 |
| H  | 8.342303  | 0.592023  | 2.000832  |
| H  | 9.252736  | 1.654192  | -0.046325 |
| C  | 5.868319  | -0.356247 | 2.460335  |
| H  | 4.856576  | -0.751899 | 2.277494  |
| C  | 5.747273  | 0.703052  | 3.550831  |
| H  | 5.093345  | 1.533199  | 3.243454  |
| H  | 5.331612  | 0.276640  | 4.476604  |
| H  | 6.728424  | 1.135758  | 3.803038  |
| C  | 6.733481  | -1.523818 | 2.919575  |
| H  | 6.821670  | -2.300019 | 2.144637  |
| H  | 7.754636  | -1.203320 | 3.178264  |
| H  | 6.311741  | -1.998339 | 3.818152  |
| C  | 5.218230  | 1.179536  | -2.393883 |
| H  | 4.194547  | 1.443421  | -2.072431 |
| C  | 5.123937  | -0.154155 | -3.132916 |
| H  | 4.441582  | -0.080178 | -3.993949 |
| H  | 6.109320  | -0.465620 | -3.515096 |
| H  | 4.754161  | -0.961225 | -2.484789 |
| C  | 5.687139  | 2.273833  | -3.339583 |
| H  | 4.977260  | 2.392371  | -4.170436 |
| H  | 5.777513  | 3.249538  | -2.838931 |
| H  | 6.662139  | 2.040828  | -3.794025 |
| C  | 2.285555  | -3.013067 | -2.712661 |
| H  | 2.589899  | -2.000695 | -2.399236 |
| C  | 2.022563  | -3.504611 | 2.371503  |
| H  | 1.781015  | -2.430169 | 2.300358  |
| C  | 1.071671  | -4.105900 | 3.394235  |
| H  | 0.027036  | -4.085530 | 3.049247  |
| H  | 1.319757  | -5.151289 | 3.634607  |
| H  | 1.117655  | -3.544161 | 4.339174  |
| C  | 3.468634  | -3.608270 | 2.849974  |
| H  | 3.780607  | -4.660669 | 2.946492  |
| H  | 4.167657  | -3.123628 | 2.152507  |
| H  | 3.595578  | -3.134368 | 3.835819  |
| C  | 1.010873  | -2.860282 | -3.536375 |
| H  | 0.643159  | -3.830973 | -3.904613 |
| H  | 0.193448  | -2.403333 | -2.957791 |
| H  | 1.186494  | -2.223931 | -4.416891 |
| C  | 3.419831  | -3.586961 | -3.553866 |
| H  | 4.354205  | -3.672310 | -2.978678 |
| H  | 3.176664  | -4.591167 | -3.934896 |
| H  | 3.624909  | -2.950736 | -4.427651 |
| H  | 0.177960  | 0.894262  | -2.182215 |
| H  | 0.803038  | 0.937886  | -4.579305 |
| C  | 0.803193  | 1.705201  | -2.565428 |
| C  | 1.151807  | 1.732429  | -3.914617 |

|   |           |           |           |
|---|-----------|-----------|-----------|
| C | 1.242547  | 2.715471  | -1.700679 |
| C | 1.937165  | 2.771836  | -4.416086 |
| H | 2.210747  | 2.791438  | -5.474032 |
| C | 2.038771  | 3.748017  | -2.207739 |
| C | 2.378933  | 3.780607  | -3.559829 |
| H | 2.393735  | 4.533737  | -1.533464 |
| H | 3.003437  | 4.591316  | -3.943473 |
| C | -0.517571 | -0.743530 | 3.420069  |
| C | 0.681745  | -0.303493 | 3.657104  |
| C | 1.920279  | 0.141051  | 3.798281  |
| H | -1.096267 | -1.263410 | 4.201092  |
| H | 2.137992  | 1.151338  | 4.163617  |
| H | 2.783797  | -0.495184 | 3.565603  |

149

Scheme\_S3\_S.X / electronic energy: -5695.08952654 a.u. / lowest freq: -278.42 cm<sup>-1</sup>

|    |           |           |           |
|----|-----------|-----------|-----------|
| C  | -1.125573 | 3.122166  | 0.825389  |
| H  | -1.753980 | 3.573743  | 0.047593  |
| C  | 0.285417  | 2.819813  | 0.261028  |
| H  | 1.041463  | 3.333599  | 0.877463  |
| C  | -0.703238 | 0.800105  | 0.977002  |
| C  | -2.893202 | 1.520066  | 1.728883  |
| C  | -2.931930 | 0.854122  | 2.961115  |
| C  | -4.105327 | 1.897435  | 1.118538  |
| C  | -4.142585 | 0.549621  | 3.576044  |
| H  | -1.984643 | 0.580118  | 3.435013  |
| C  | -5.313996 | 1.604492  | 1.755932  |
| C  | -5.340241 | 0.932378  | 2.975111  |
| H  | -4.144628 | 0.028159  | 4.535765  |
| H  | -6.242608 | 1.896529  | 1.262288  |
| H  | -6.296651 | 0.709294  | 3.453054  |
| S  | -4.202276 | 2.705875  | -0.489164 |
| O  | -5.586187 | 2.442907  | -0.981324 |
| O  | -3.213229 | 1.981773  | -1.349206 |
| O  | -3.902177 | 4.131054  | -0.267033 |
| Cu | -0.883069 | -1.071498 | 1.655223  |
| C  | -1.124674 | 4.008273  | 2.043817  |
| C  | -1.624471 | 5.311350  | 1.964375  |
| C  | -0.596776 | 3.550267  | 3.258811  |
| C  | -1.587218 | 6.149729  | 3.079798  |
| H  | -2.052806 | 5.661231  | 1.021501  |
| C  | -0.565140 | 4.384770  | 4.373418  |
| H  | -0.209446 | 2.527857  | 3.328796  |
| C  | -1.058759 | 5.688608  | 4.284948  |
| H  | -1.979826 | 7.166956  | 3.007388  |
| H  | -0.153910 | 4.016749  | 5.316762  |
| H  | -1.034368 | 6.343563  | 5.159312  |
| N  | -1.624255 | 1.760750  | 1.139995  |
| N  | 0.405794  | 1.363233  | 0.466401  |
| C  | -1.740307 | -2.961520 | 1.749784  |
| C  | -0.912732 | -4.103566 | 2.132431  |
| C  | -0.814369 | -4.456628 | 3.492710  |
| C  | -0.230432 | -4.896839 | 1.190196  |
| C  | -0.055923 | -5.550468 | 3.897939  |
| C  | 0.512784  | -6.001057 | 1.597182  |
| C  | 0.610419  | -6.330349 | 2.950741  |
| H  | 0.007042  | -5.803515 | 4.959122  |
| H  | 1.017272  | -6.616120 | 0.847637  |
| H  | 1.196398  | -7.197399 | 3.264921  |
| C  | -1.879512 | -2.452625 | 0.442062  |
| C  | -2.881056 | -1.524606 | 0.083658  |
| H  | -2.732617 | -0.892428 | -0.794412 |
| H  | -3.521222 | -1.107560 | 0.866009  |
| H  | -0.301030 | -4.665174 | 0.124050  |
| H  | -1.217282 | -2.816121 | -0.351858 |
| P  | -4.931479 | -1.947040 | -1.946703 |
| O  | -6.031482 | -0.812101 | -1.473928 |
| O  | -4.110822 | -1.195190 | -2.959572 |
| O  | -5.823800 | -3.147017 | -2.564544 |
| O  | -4.293394 | -2.583021 | -0.702712 |
| Na | -4.845751 | 0.943757  | -2.645896 |
| H  | -2.513682 | -2.678701 | 2.478210  |
| H  | -1.353710 | -3.861617 | 4.235445  |
| C  | -6.960453 | -1.093921 | -0.439053 |
| H  | -7.540926 | -0.182428 | -0.254264 |
| H  | -7.651807 | -1.899540 | -0.731973 |
| H  | -6.449771 | -1.392489 | 0.489012  |
| C  | -6.544262 | -2.910934 | -3.767036 |
| H  | -7.075837 | -3.836262 | -4.016898 |
| H  | -7.285038 | -2.104801 | -3.645722 |
| H  | -5.870686 | -2.654294 | -4.597627 |
| C  | 1.560736  | 0.670758  | 0.044081  |
| C  | 2.789418  | 1.340474  | -0.025414 |
| C  | 1.481310  | -0.661459 | -0.364752 |

|   |           |           |           |
|---|-----------|-----------|-----------|
| C | 3.928445  | 0.680552  | -0.495491 |
| C | 2.612425  | -1.340695 | -0.825980 |
| C | 3.831114  | -0.660249 | -0.888675 |
| H | 4.719680  | -1.170132 | -1.273286 |
| H | 0.518926  | -1.177365 | -0.376690 |
| H | 2.869326  | 2.384459  | 0.287147  |
| C | 2.460118  | -2.746677 | -1.289042 |
| C | 3.052872  | -3.809530 | -0.559217 |
| C | 1.695322  | -3.003304 | -2.450595 |
| C | 2.830919  | -5.119157 | -0.997841 |
| C | 1.483876  | -4.334835 | -2.836074 |
| C | 2.041209  | -5.384172 | -2.115807 |
| H | 3.276838  | -5.954600 | -0.453913 |
| H | 0.884340  | -4.546843 | -3.726388 |
| H | 1.871842  | -6.417293 | -2.431203 |
| C | 5.245179  | 1.376515  | -0.556839 |
| C | 5.509739  | 2.315407  | -1.585979 |
| C | 6.224602  | 1.079451  | 0.416334  |
| C | 6.764398  | 2.934021  | -1.617511 |
| C | 7.469178  | 1.720162  | 0.339856  |
| C | 7.738954  | 2.639302  | -0.665933 |
| H | 6.990443  | 3.659129  | -2.402365 |
| H | 8.234788  | 1.496748  | 1.089111  |
| H | 8.712850  | 3.133708  | -0.711420 |
| C | 5.970869  | 0.110691  | 1.558922  |
| H | 4.937855  | -0.263639 | 1.469526  |
| C | 6.079605  | 0.809056  | 2.910164  |
| H | 5.402416  | 1.673770  | 2.978664  |
| H | 5.825479  | 0.121835  | 3.731438  |
| H | 7.100367  | 1.176492  | 3.099544  |
| C | 6.896116  | -1.099116 | 1.489486  |
| H | 6.800772  | -1.637468 | 0.534174  |
| H | 7.953458  | -0.809256 | 1.596480  |
| H | 6.673168  | -1.811191 | 2.298486  |
| C | 4.482555  | 2.596744  | -2.672210 |
| H | 3.486737  | 2.605640  | -2.193220 |
| C | 4.471769  | 1.476049  | -3.710828 |
| H | 3.678900  | 1.634344  | -4.458150 |
| H | 5.430734  | 1.429942  | -4.251129 |
| H | 4.305169  | 0.487769  | -3.258295 |
| C | 4.665588  | 3.943276  | -3.354548 |
| H | 3.839954  | 4.133562  | -4.054971 |
| H | 4.689268  | 4.775987  | -2.635686 |
| H | 5.592924  | 3.987513  | -3.946030 |
| C | 1.131959  | -1.889476 | -3.321436 |
| H | 1.536816  | -0.932305 | -2.954751 |
| C | 3.880191  | -3.534947 | 0.688999  |
| H | 4.533786  | -2.676621 | 0.456688  |
| C | 3.008266  | -3.112311 | 1.870243  |
| H | 2.334921  | -2.280377 | 1.619550  |
| H | 2.380175  | -3.945571 | 2.223485  |
| H | 3.629576  | -2.786561 | 2.719792  |
| C | 4.786420  | -4.687032 | 1.091497  |
| H | 4.214744  | -5.561017 | 1.441561  |
| H | 5.434102  | -5.021158 | 0.267548  |
| H | 5.439792  | -4.387765 | 1.923536  |
| C | -0.388260 | -1.801895 | -3.232268 |
| H | -0.872290 | -2.739326 | -3.550137 |
| H | -0.731206 | -1.589648 | -2.208433 |
| H | -0.779069 | -1.000177 | -3.877231 |
| C | 1.586964  | -2.027586 | -4.770530 |
| H | 2.682852  | -2.080634 | -4.850221 |
| H | 1.175665  | -2.927233 | -5.253437 |
| H | 1.255510  | -1.163310 | -5.365709 |
| H | -0.367736 | 1.394806  | -1.993883 |
| H | -0.078222 | 2.089746  | -4.356895 |
| C | 0.073804  | 2.368595  | -2.224474 |
| C | 0.231857  | 2.761825  | -3.552153 |
| C | 0.474271  | 3.214318  | -1.182933 |
| C | 0.780589  | 4.009552  | -3.853574 |
| H | 0.905552  | 4.316804  | -4.894952 |
| C | 1.031480  | 4.459602  | -1.492158 |
| C | 1.176638  | 4.859222  | -2.820424 |
| H | 1.355050  | 5.119974  | -0.681282 |
| H | 1.615422  | 5.833631  | -3.049614 |
| C | 0.211473  | -1.112499 | 3.325787  |
| C | 1.194065  | -0.278863 | 3.498646  |
| C | 2.198522  | 0.580196  | 3.571493  |
| H | 0.046410  | -1.917776 | 4.059437  |
| H | 2.116609  | 1.537994  | 4.098901  |
| H | 3.172410  | 0.346779  | 3.124094  |

152

Scheme\_S3\_S.XI / electronic energy: -5734.37462512 a.u. / lowest freq: -291.98 cm<sup>-1</sup>

|    |           |           |           |
|----|-----------|-----------|-----------|
| C  | -0.800838 | 3.089093  | 1.200559  |
| H  | -1.361786 | 3.737658  | 0.515546  |
| C  | 0.555852  | 2.688628  | 0.586270  |
| H  | 1.366403  | 3.120064  | 1.193658  |
| C  | -0.651025 | 0.731388  | 1.099969  |
| C  | -2.806542 | 1.609044  | 1.763035  |
| C  | -3.011066 | 0.888333  | 2.946912  |
| C  | -3.919643 | 2.134099  | 1.079283  |
| C  | -4.294099 | 0.684790  | 3.446391  |
| H  | -2.137061 | 0.491746  | 3.472219  |
| C  | -5.202863 | 1.926424  | 1.591973  |
| C  | -5.394814 | 1.205818  | 2.767987  |
| H  | -4.429271 | 0.122203  | 4.372998  |
| H  | -6.055280 | 2.331421  | 1.042595  |
| H  | -6.405376 | 1.054629  | 3.153238  |
| S  | -3.781269 | 3.112458  | -0.422772 |
| O  | -5.081090 | 2.958707  | -1.137273 |
| O  | -2.684382 | 2.485457  | -1.226424 |
| O  | -3.493597 | 4.489404  | 0.021732  |
| Cu | -1.197662 | -1.169605 | 1.406703  |
| C  | -0.740510 | 3.729114  | 2.565352  |
| C  | -1.621289 | 4.769867  | 2.879288  |
| C  | 0.135016  | 3.253240  | 3.551497  |
| C  | -1.617353 | 5.337020  | 4.154472  |
| H  | -2.316245 | 5.124714  | 2.112115  |
| C  | 0.137757  | 3.819574  | 4.824317  |
| H  | 0.820885  | 2.429327  | 3.325465  |
| C  | -0.737810 | 4.864614  | 5.127882  |
| H  | -2.306151 | 6.152615  | 4.388149  |
| H  | 0.826467  | 3.442762  | 5.584514  |
| H  | -0.733642 | 5.309266  | 6.126084  |
| N  | -1.477441 | 1.765623  | 1.292701  |
| N  | 0.551619  | 1.218023  | 0.735984  |
| C  | -2.206932 | -2.897487 | 0.733395  |
| C  | -2.858287 | -3.588140 | 1.867413  |
| C  | -2.565301 | -4.932975 | 2.158132  |
| C  | -3.755227 | -2.918327 | 2.723100  |
| C  | -3.150909 | -5.579357 | 3.246831  |
| C  | -4.337909 | -3.561979 | 3.807396  |
| C  | -4.039920 | -4.900770 | 4.077232  |
| H  | -2.905553 | -6.625518 | 3.445458  |
| H  | -5.024878 | -3.011478 | 4.455502  |
| H  | -4.493703 | -5.405834 | 4.933058  |
| C  | -2.783175 | -1.720426 | 0.185771  |
| C  | -2.250201 | -1.010732 | -0.916301 |
| H  | -2.599285 | 0.013891  | -1.081170 |
| H  | -1.231419 | -1.197607 | -1.253666 |
| H  | -3.979753 | -1.862751 | 2.554024  |
| H  | -3.724414 | -1.343524 | 0.600770  |
| P  | -3.607485 | -0.850655 | -3.475448 |
| O  | -4.866395 | -0.103319 | -2.709886 |
| O  | -2.852346 | 0.311636  | -4.057083 |
| O  | -4.305492 | -1.817818 | -4.567918 |
| O  | -2.957354 | -1.840816 | -2.495649 |
| Na | -3.978301 | 2.055399  | -3.084414 |
| C  | -1.183902 | -3.667108 | -0.050071 |
| H  | -1.876345 | -5.493553 | 1.523284  |
| C  | -5.853396 | -0.862902 | -2.027116 |
| H  | -6.272958 | -0.236771 | -1.229500 |
| H  | -6.664595 | -1.155659 | -2.710821 |
| H  | -5.422921 | -1.771175 | -1.580290 |
| C  | -4.910697 | -1.227227 | -5.711189 |
| H  | -5.353618 | -2.037634 | -6.301061 |
| H  | -5.710322 | -0.523762 | -5.430252 |
| H  | -4.172111 | -0.698677 | -6.330889 |
| C  | 1.665344  | 0.454173  | 0.330697  |
| C  | 2.933535  | 1.047638  | 0.292234  |
| C  | 1.520671  | -0.873314 | -0.081837 |
| C  | 4.046068  | 0.324571  | -0.147803 |
| C  | 2.621439  | -1.614943 | -0.514806 |
| C  | 3.881982  | -1.009879 | -0.542306 |
| H  | 4.747839  | -1.573705 | -0.904017 |
| H  | 0.536244  | -1.344471 | -0.088600 |
| H  | 3.068391  | 2.086985  | 0.599270  |
| C  | 2.404313  | -3.008648 | -1.000988 |
| C  | 2.490505  | -4.093796 | -0.096847 |
| C  | 2.055868  | -3.220179 | -2.352631 |
| C  | 2.238438  | -5.385022 | -0.572806 |
| C  | 1.801733  | -4.529846 | -2.783606 |
| C  | 1.893841  | -5.603749 | -1.905144 |
| H  | 2.301130  | -6.234896 | 0.112033  |
| H  | 1.520658  | -4.706802 | -3.826235 |
| H  | 1.691618  | -6.618674 | -2.257633 |

|   |           |           |           |
|---|-----------|-----------|-----------|
| C | 5.388864  | 0.973248  | -0.192270 |
| C | 5.690706  | 1.906296  | -1.217505 |
| C | 6.343657  | 0.663875  | 0.802333  |
| C | 6.955996  | 2.504130  | -1.224324 |
| C | 7.595214  | 1.293586  | 0.756238  |
| C | 7.902223  | 2.203251  | -0.247216 |
| H | 7.211366  | 3.221460  | -2.007099 |
| H | 8.336596  | 1.072892  | 1.529318  |
| H | 8.882566  | 2.686382  | -0.269572 |
| C | 6.036926  | -0.274753 | 1.956407  |
| H | 5.113205  | -0.824210 | 1.713956  |
| C | 5.767021  | 0.517234  | 3.232640  |
| H | 4.932892  | 1.224283  | 3.106629  |
| H | 5.513444  | -0.150279 | 4.070408  |
| H | 6.650289  | 1.102063  | 3.535396  |
| C | 7.131514  | -1.311676 | 2.172223  |
| H | 7.341317  | -1.884582 | 1.256312  |
| H | 8.078770  | -0.855060 | 2.497623  |
| H | 6.841623  | -2.028963 | 2.954147  |
| C | 4.687218  | 2.216347  | -2.318535 |
| H | 3.688301  | 2.271886  | -1.849078 |
| C | 4.634371  | 1.087668  | -3.346831 |
| H | 3.852008  | 1.276475  | -4.097935 |
| H | 5.592679  | 0.994986  | -3.882510 |
| H | 4.422490  | 0.112693  | -2.885345 |
| C | 4.931450  | 3.547336  | -3.012269 |
| H | 4.118447  | 3.765969  | -3.719036 |
| H | 4.986947  | 4.385438  | -2.301484 |
| H | 5.863132  | 3.546420  | -3.598479 |
| C | 1.921024  | -2.077641 | -3.346081 |
| H | 2.223238  | -1.144722 | -2.841031 |
| C | 2.866212  | -3.861224 | 1.355009  |
| H | 2.523280  | -2.844806 | 1.613146  |
| C | 2.189757  | -4.816830 | 2.326395  |
| H | 1.098180  | -4.846313 | 2.188561  |
| H | 2.565469  | -5.847402 | 2.231323  |
| H | 2.380457  | -4.506053 | 3.364414  |
| C | 4.381012  | -3.891727 | 1.539954  |
| H | 4.788324  | -4.888998 | 1.307986  |
| H | 4.891567  | -3.171240 | 0.884289  |
| H | 4.657239  | -3.655898 | 2.579445  |
| C | 0.472383  | -1.899713 | -3.788353 |
| H | 0.090491  | -2.792528 | -4.308838 |
| H | -0.201180 | -1.715549 | -2.938180 |
| H | 0.364529  | -1.048685 | -4.477944 |
| C | 2.847128  | -2.261926 | -4.542494 |
| H | 3.898929  | -2.361463 | -4.234633 |
| H | 2.589551  | -3.159790 | -5.125500 |
| H | 2.781697  | -1.404894 | -5.229126 |
| H | -0.132738 | 1.331928  | -1.723754 |
| H | 0.187502  | 2.085152  | -4.059114 |
| C | 0.339197  | 2.299084  | -1.919590 |
| C | 0.512965  | 2.725628  | -3.235409 |
| C | 0.752162  | 3.106694  | -0.853217 |
| C | 1.094429  | 3.966116  | -3.501412 |
| H | 1.231906  | 4.297442  | -4.533840 |
| C | 1.344177  | 4.344636  | -1.128493 |
| C | 1.508096  | 4.776663  | -2.443853 |
| H | 1.679415  | 4.975833  | -0.299496 |
| H | 1.974935  | 5.744539  | -2.643546 |
| C | -0.176345 | -1.964761 | 2.922219  |
| C | 0.935994  | -1.444306 | 3.351414  |
| C | 2.081476  | -0.875397 | 3.696934  |
| H | -0.711898 | -3.075960 | -0.844653 |
| H | -1.659414 | -4.528020 | -0.550759 |
| H | -0.386997 | -4.070280 | 0.590276  |
| H | -0.561929 | -2.882581 | 3.398006  |
| H | 3.028992  | -1.168365 | 3.225852  |
| H | 2.140621  | -0.110607 | 4.480392  |

152

Scheme\_S3\_S\_XII / electronic energy: -5734.37170022 a.u. / lowest freq: -269.37 cm<sup>-1</sup>

|   |           |           |          |
|---|-----------|-----------|----------|
| C | 0.646695  | -3.374360 | 0.938189 |
| H | 1.200408  | -4.034714 | 0.258840 |
| C | -0.703543 | -2.947346 | 0.329203 |
| H | -1.526410 | -3.365717 | 0.930134 |
| C | 0.538043  | -1.012092 | 0.876099 |
| C | 2.680086  | -1.958052 | 1.521815 |
| C | 2.866436  | -1.480242 | 2.823019 |
| C | 3.799339  | -2.328982 | 0.754140 |
| C | 4.146242  | -1.375825 | 3.364906 |
| H | 1.984627  | -1.202637 | 3.408141 |
| C | 5.075155  | -2.236925 | 1.311443 |
| C | 5.251766  | -1.763690 | 2.611070 |

|    |           |           |           |
|----|-----------|-----------|-----------|
| H  | 4.273535  | -0.999464 | 4.382444  |
| H  | 5.930868  | -2.531309 | 0.701643  |
| H  | 6.258084  | -1.695581 | 3.030783  |
| S  | 3.654781  | -2.844702 | -0.965965 |
| O  | 5.057752  | -2.925400 | -1.472857 |
| O  | 2.941337  | -1.720420 | -1.649955 |
| O  | 2.939501  | -4.132063 | -0.973405 |
| Cu | 0.954673  | 0.818830  | 1.583626  |
| C  | 0.584883  | -3.978222 | 2.316932  |
| C  | 1.444423  | -5.026945 | 2.659669  |
| C  | -0.255152 | -3.435953 | 3.298611  |
| C  | 1.459314  | -5.531412 | 3.960751  |
| H  | 2.111439  | -5.443010 | 1.898103  |
| C  | -0.239433 | -3.936443 | 4.598133  |
| H  | -0.918485 | -2.602427 | 3.044993  |
| C  | 0.619014  | -4.986908 | 4.931657  |
| H  | 2.132626  | -6.352850 | 4.217594  |
| H  | -0.897887 | -3.502768 | 5.355361  |
| H  | 0.632309  | -5.380217 | 5.951050  |
| N  | 1.358719  | -2.061740 | 1.010421  |
| N  | -0.667885 | -1.475601 | 0.493399  |
| C  | 2.028715  | 2.637124  | 1.787132  |
| C  | 1.210977  | 3.836580  | 2.090072  |
| C  | 0.875588  | 4.165195  | 3.418216  |
| C  | 0.809643  | 4.729486  | 1.077827  |
| C  | 0.167250  | 5.325026  | 3.718610  |
| C  | 0.119357  | 5.900520  | 1.382151  |
| C  | -0.209633 | 6.204946  | 2.702896  |
| H  | -0.084448 | 5.548030  | 4.758340  |
| H  | -0.152809 | 6.586755  | 0.576301  |
| H  | -0.751103 | 7.124062  | 2.940003  |
| C  | 2.087275  | 2.144511  | 0.456960  |
| C  | 3.011209  | 1.191556  | -0.012521 |
| H  | 2.811460  | 0.691001  | -0.962042 |
| H  | 3.627418  | 0.619965  | 0.684444  |
| H  | 1.076403  | 4.533512  | 0.036857  |
| H  | 1.412656  | 2.576908  | -0.289469 |
| P  | 5.233256  | 1.662432  | -1.858555 |
| O  | 6.107777  | 0.342504  | -1.382266 |
| O  | 4.477015  | 1.139607  | -3.048880 |
| O  | 6.351424  | 2.777308  | -2.216468 |
| O  | 4.519906  | 2.255194  | -0.636435 |
| Na | 4.836078  | -1.094252 | -2.891087 |
| C  | 3.109664  | 2.295280  | 2.772757  |
| H  | 1.169669  | 3.502091  | 4.234188  |
| C  | 6.968047  | 0.440226  | -0.258115 |
| H  | 7.431217  | -0.541090 | -0.102254 |
| H  | 7.766022  | 1.179793  | -0.429451 |
| H  | 6.415042  | 0.729655  | 0.649246  |
| C  | 7.184046  | 2.571553  | -3.349739 |
| H  | 7.916274  | 3.386990  | -3.369497 |
| H  | 7.728383  | 1.615996  | -3.287757 |
| H  | 6.604923  | 2.590821  | -4.284573 |
| C  | -1.730891 | -0.670298 | 0.038058  |
| C  | -3.033597 | -1.180446 | -0.013765 |
| C  | -1.481733 | 0.624953  | -0.416154 |
| C  | -4.075508 | -0.398062 | -0.521846 |
| C  | -2.511131 | 1.426063  | -0.912708 |
| C  | -3.806266 | 0.903315  | -0.964733 |
| H  | -4.620393 | 1.508250  | -1.375170 |
| H  | -0.460400 | 1.009089  | -0.423872 |
| H  | -3.246560 | -2.192307 | 0.339383  |
| C  | -2.173123 | 2.785529  | -1.412837 |
| C  | -2.642037 | 3.934482  | -0.725531 |
| C  | -1.348178 | 2.909889  | -2.555078 |
| C  | -2.252553 | 5.193555  | -1.194086 |
| C  | -0.971023 | 4.193966  | -2.973988 |
| C  | -1.415268 | 5.325386  | -2.300821 |
| H  | -2.600101 | 6.093078  | -0.681556 |
| H  | -0.326293 | 4.305490  | -3.850624 |
| H  | -1.115076 | 6.319817  | -2.642179 |
| C  | -5.470227 | -0.921455 | -0.572671 |
| C  | -5.852889 | -1.835473 | -1.586484 |
| C  | -6.403087 | -0.482025 | 0.391655  |
| C  | -7.177814 | -2.284983 | -1.612406 |
| C  | -7.719006 | -0.960701 | 0.325511  |
| C  | -8.106038 | -1.851806 | -0.667334 |
| H  | -7.496429 | -2.986864 | -2.386245 |
| H  | -8.447868 | -0.630331 | 1.071826  |
| H  | -9.135827 | -2.216574 | -0.706691 |
| C  | -6.025486 | 0.466476  | 1.516567  |
| H  | -4.961259 | 0.730487  | 1.402668  |
| C  | -6.178616 | -0.207397 | 2.876004  |

|   |           |           |           |
|---|-----------|-----------|-----------|
| H | -5.572496 | -1.123379 | 2.946499  |
| H | -5.864397 | 0.463609  | 3.689766  |
| H | -7.224664 | -0.489090 | 3.074920  |
| C | -6.821608 | 1.764960  | 1.451480  |
| H | -6.705302 | 2.271654  | 0.481316  |
| H | -7.898995 | 1.591599  | 1.601529  |
| H | -6.496120 | 2.466076  | 2.235006  |
| C | -4.864986 | -2.273270 | -2.656735 |
| H | -3.880193 | -2.385585 | -2.168506 |
| C | -4.707411 | -1.199846 | -3.732439 |
| H | -3.936296 | -1.488667 | -4.463570 |
| H | -5.649442 | -1.050456 | -4.283808 |
| H | -4.414118 | -0.226306 | -3.313559 |
| C | -5.207704 | -3.609145 | -3.296930 |
| H | -4.411163 | -3.917564 | -3.988902 |
| H | -5.331148 | -4.410833 | -2.553275 |
| H | -6.133714 | -3.560719 | -3.890071 |
| C | -0.877664 | 1.707106  | -3.361089 |
| H | -1.432989 | 0.821549  | -3.010588 |
| C | -3.507332 | 3.800399  | 0.519490  |
| H | -4.253503 | 3.014916  | 0.311086  |
| C | -2.692297 | 3.328719  | 1.723151  |
| H | -2.139078 | 2.398885  | 1.524110  |
| H | -1.955172 | 4.089541  | 2.023571  |
| H | -3.346268 | 3.145933  | 2.590588  |
| C | -4.278443 | 5.062317  | 0.871364  |
| H | -3.615173 | 5.873253  | 1.211345  |
| H | -4.865602 | 5.446237  | 0.024021  |
| H | -4.978714 | 4.865161  | 1.695678  |
| C | 0.606825  | 1.424250  | -3.144878 |
| H | 1.231849  | 2.288971  | -3.420624 |
| H | 0.830146  | 1.181591  | -2.095286 |
| H | 0.941870  | 0.570611  | -3.754237 |
| C | -1.189455 | 1.860080  | -4.845915 |
| H | -2.255029 | 2.069878  | -5.021663 |
| H | -0.610743 | 2.671381  | -5.313297 |
| H | -0.942271 | 0.936374  | -5.390502 |
| H | 0.378224  | -1.788923 | -1.909313 |
| H | 0.044132  | -2.458435 | -4.271063 |
| C | -0.271062 | -2.636435 | -2.146414 |
| C | -0.450104 | -3.020553 | -3.473992 |
| C | -0.900384 | -3.344085 | -1.114741 |
| C | -1.247881 | -4.123462 | -3.785153 |
| H | -1.386790 | -4.424250 | -4.826736 |
| C | -1.703698 | -4.443843 | -1.433364 |
| C | -1.869653 | -4.837956 | -2.761102 |
| H | -2.205860 | -4.993694 | -0.631109 |
| H | -2.499079 | -5.699648 | -2.997272 |
| C | 0.018303  | 0.838490  | 3.338895  |
| C | -1.178897 | 0.356625  | 3.496324  |
| C | -2.406717 | -0.135542 | 3.557086  |
| H | 3.656700  | 1.381521  | 2.511880  |
| H | 2.727110  | 2.164597  | 3.794208  |
| H | 3.848148  | 3.113975  | 2.814698  |
| H | 0.537553  | 1.289976  | 4.199686  |
| H | -2.605347 | -1.178747 | 3.832398  |
| H | -3.283927 | 0.491781  | 3.360442  |

161

Scheme\_S3\_S.XIII / electronic energy: -6103.58659718 a.u. / lowest freq: -223.58 cm-1

|    |           |           |           |
|----|-----------|-----------|-----------|
| C  | -0.740234 | 3.160606  | -0.593492 |
| H  | -1.380733 | 3.301123  | -1.474989 |
| C  | 0.563083  | 2.427415  | -1.017295 |
| H  | 1.443918  | 3.005993  | -0.690499 |
| C  | -0.640474 | 1.053308  | 0.470553  |
| C  | -2.603710 | 2.357088  | 0.974561  |
| C  | -2.593901 | 2.340005  | 2.375115  |
| C  | -3.826331 | 2.520427  | 0.299729  |
| C  | -3.774592 | 2.478545  | 3.099062  |
| H  | -1.635242 | 2.215628  | 2.886058  |
| C  | -5.005107 | 2.670599  | 1.034828  |
| C  | -4.984070 | 2.650657  | 2.427039  |
| H  | -3.744814 | 2.457205  | 4.190900  |
| H  | -5.945568 | 2.786132  | 0.492520  |
| H  | -5.915775 | 2.764953  | 2.985613  |
| S  | -3.948462 | 2.541921  | -1.490955 |
| O  | -5.366643 | 2.193870  | -1.808187 |
| O  | -3.046456 | 1.448988  | -1.974766 |
| O  | -3.550483 | 3.897442  | -1.908525 |
| Cu | -1.366930 | -0.457765 | 1.537458  |
| C  | -0.536357 | 4.494218  | 0.073402  |
| C  | -0.807299 | 5.668746  | -0.636961 |
| C  | -0.060844 | 4.585130  | 1.388248  |
| C  | -0.591496 | 6.915616  | -0.049898 |

|    |           |           |           |
|----|-----------|-----------|-----------|
| H  | -1.198403 | 5.597731  | -1.655744 |
| C  | 0.147993  | 5.831215  | 1.976960  |
| H  | 0.143591  | 3.669547  | 1.954822  |
| C  | -0.114919 | 6.999062  | 1.257986  |
| H  | -0.806187 | 7.826157  | -0.614555 |
| H  | 0.514471  | 5.894176  | 3.004345  |
| H  | 0.047014  | 7.974935  | 1.722241  |
| N  | -1.365823 | 2.162327  | 0.299894  |
| N  | 0.497232  | 1.171180  | -0.242578 |
| C  | -2.581366 | -2.098265 | 1.698357  |
| C  | -3.397952 | -2.076156 | 2.909317  |
| C  | -3.021744 | -2.875534 | 4.005815  |
| C  | -4.527762 | -1.246562 | 3.051343  |
| C  | -3.738152 | -2.841107 | 5.198729  |
| C  | -5.239718 | -1.211229 | 4.245927  |
| C  | -4.849064 | -2.005651 | 5.326999  |
| H  | -3.426610 | -3.470081 | 6.036234  |
| H  | -6.109855 | -0.555243 | 4.334909  |
| H  | -5.409756 | -1.974024 | 6.264076  |
| C  | -2.886529 | -1.416251 | 0.491997  |
| C  | -2.176485 | -1.627553 | -0.706873 |
| H  | -2.242589 | -0.871267 | -1.492413 |
| H  | -1.254362 | -2.212292 | -0.688799 |
| H  | -4.849109 | -0.612239 | 2.220772  |
| H  | -3.743806 | -0.733941 | 0.450924  |
| P  | -4.103239 | -2.486410 | -2.706960 |
| O  | -5.251456 | -1.635659 | -1.871433 |
| O  | -3.722125 | -1.525893 | -3.799406 |
| O  | -4.875670 | -3.810526 | -3.224796 |
| O  | -3.070562 | -3.038937 | -1.714494 |
| Na | -4.764500 | 0.373011  | -3.140197 |
| H  | -1.844852 | -2.912690 | 1.637404  |
| H  | -2.148740 | -3.528151 | 3.909753  |
| C  | -5.949449 | -2.244991 | -0.794018 |
| H  | -6.375461 | -1.448474 | -0.171148 |
| H  | -6.769577 | -2.879208 | -1.164117 |
| H  | -5.279473 | -2.862899 | -0.176569 |
| C  | -5.807032 | -3.682294 | -4.291456 |
| H  | -6.245430 | -4.672263 | -4.461847 |
| H  | -6.618796 | -2.980465 | -4.043156 |
| H  | -5.317476 | -3.345732 | -5.216641 |
| C  | 1.526108  | 0.208279  | -0.299157 |
| C  | 2.741359  | 0.504214  | -0.934216 |
| C  | 1.355755  | -1.060450 | 0.262918  |
| C  | 3.762877  | -0.449091 | -1.002623 |
| C  | 2.372331  | -2.017350 | 0.233714  |
| C  | 3.578148  | -1.703485 | -0.400955 |
| H  | 4.379921  | -2.446651 | -0.455018 |
| H  | 0.412207  | -1.335495 | 0.737112  |
| H  | 2.909015  | 1.482555  | -1.387868 |
| C  | 2.090280  | -3.343137 | 0.864043  |
| C  | 2.336749  | -3.529553 | 2.244909  |
| C  | 1.493841  | -4.369647 | 0.095337  |
| C  | 1.976462  | -4.747751 | 2.834387  |
| C  | 1.153400  | -5.573260 | 0.726690  |
| C  | 1.386440  | -5.761480 | 2.084976  |
| H  | 2.160527  | -4.905764 | 3.900081  |
| H  | 0.693479  | -6.375707 | 0.144120  |
| H  | 1.108085  | -6.704331 | 2.563079  |
| C  | 5.030026  | -0.141923 | -1.729255 |
| C  | 5.026377  | -0.035943 | -3.147664 |
| C  | 6.229727  | 0.033741  | -1.004351 |
| C  | 6.237065  | 0.223760  | -3.799236 |
| C  | 7.416684  | 0.292587  | -1.705039 |
| C  | 7.425171  | 0.383123  | -3.089281 |
| H  | 6.259297  | 0.302266  | -4.887632 |
| H  | 8.347481  | 0.433220  | -1.147604 |
| H  | 8.357782  | 0.584174  | -3.622966 |
| C  | 6.293666  | -0.001621 | 0.513040  |
| H  | 5.279827  | -0.198567 | 0.900997  |
| C  | 6.739732  | 1.346658  | 1.070507  |
| H  | 6.103892  | 2.169462  | 0.712428  |
| H  | 6.706675  | 1.351642  | 2.170259  |
| H  | 7.774994  | 1.583218  | 0.778424  |
| C  | 7.202840  | -1.120941 | 1.008071  |
| H  | 6.887974  | -2.105983 | 0.632211  |
| H  | 8.244444  | -0.967335 | 0.685099  |
| H  | 7.211431  | -1.169043 | 2.107377  |
| C  | 3.754241  | -0.243412 | -3.959768 |
| H  | 2.949983  | 0.333704  | -3.467789 |
| C  | 3.318789  | -1.707173 | -3.955099 |
| H  | 2.374004  | -1.838330 | -4.505293 |
| H  | 4.073818  | -2.348200 | -4.438119 |

|    |           |           |           |
|----|-----------|-----------|-----------|
| H  | 3.162138  | -2.094372 | -2.939682 |
| C  | 3.850623  | 0.260613  | -5.391103 |
| H  | 2.875564  | 0.171142  | -5.890484 |
| H  | 4.156788  | 1.315540  | -5.448602 |
| H  | 4.563825  | -0.326537 | -5.990204 |
| C  | 1.273279  | -4.214541 | -1.398884 |
| H  | 1.203898  | -3.134017 | -1.617380 |
| C  | 3.045408  | -2.467811 | 3.066041  |
| H  | 2.802502  | -1.483842 | 2.625358  |
| C  | 2.622052  | -2.428623 | 4.526762  |
| H  | 1.530399  | -2.372774 | 4.648779  |
| H  | 2.972158  | -3.311039 | 5.084408  |
| H  | 3.053005  | -1.548715 | 5.026094  |
| C  | 4.556295  | -2.658694 | 2.956461  |
| H  | 4.856806  | -3.645837 | 3.343139  |
| H  | 4.903019  | -2.596806 | 1.914750  |
| H  | 5.099223  | -1.899401 | 3.539600  |
| C  | -0.011573 | -4.863440 | -1.895323 |
| H  | 0.046478  | -5.962646 | -1.880697 |
| H  | -0.889988 | -4.570912 | -1.302933 |
| H  | -0.213720 | -4.572741 | -2.936876 |
| C  | 2.478723  | -4.757703 | -2.163342 |
| H  | 3.414941  | -4.262073 | -1.866195 |
| H  | 2.606904  | -5.835755 | -1.975696 |
| H  | 2.358242  | -4.623122 | -3.248848 |
| H  | -0.505901 | 0.364903  | -2.483664 |
| H  | -0.497890 | 0.104388  | -4.947871 |
| C  | 0.001235  | 1.106078  | -3.106843 |
| C  | 0.001936  | 0.963966  | -4.493457 |
| C  | 0.633019  | 2.201594  | -2.507971 |
| C  | 0.632976  | 1.915959  | -5.295882 |
| H  | 0.631566  | 1.804807  | -6.383023 |
| C  | 1.278528  | 3.143462  | -3.316656 |
| C  | 1.274956  | 3.004314  | -4.704330 |
| H  | 1.782651  | 3.996496  | -2.851378 |
| H  | 1.780479  | 3.747500  | -5.326064 |
| C  | -0.640643 | -0.470020 | 3.434293  |
| H  | -0.408345 | -1.519727 | 3.680068  |
| H  | -1.497378 | -0.140895 | 4.047999  |
| C  | 0.484980  | 0.385156  | 3.521674  |
| C  | 1.466945  | 1.136946  | 3.525382  |
| Si | 2.955814  | 2.202676  | 3.602610  |
| C  | 3.336624  | 2.929753  | 1.913941  |
| H  | 3.520002  | 2.140659  | 1.167332  |
| H  | 2.517522  | 3.563152  | 1.539854  |
| H  | 4.238361  | 3.561286  | 1.960103  |
| C  | 2.649233  | 3.583911  | 4.835042  |
| H  | 1.751532  | 4.169258  | 4.585629  |
| H  | 2.507300  | 3.189437  | 5.852778  |
| H  | 3.499666  | 4.283109  | 4.868031  |
| C  | 4.423253  | 1.171626  | 4.154580  |
| H  | 4.636237  | 0.367483  | 3.433176  |
| H  | 5.328946  | 1.793374  | 4.236363  |
| H  | 4.257760  | 0.706020  | 5.137953  |

161

Scheme\_S3\_S.XIV / electronic energy: -6103.58384223 a.u. / lowest freq: -284.42 cm<sup>-1</sup>

|    |           |           |           |
|----|-----------|-----------|-----------|
| C  | -0.910201 | -3.178462 | -0.544848 |
| H  | -1.601095 | -3.663911 | 0.155125  |
| C  | 0.348689  | -2.687235 | 0.202578  |
| H  | 1.236436  | -3.208238 | -0.192055 |
| C  | -0.680469 | -0.839298 | -0.848941 |
| C  | -2.719332 | -1.834892 | -1.723317 |
| C  | -2.690609 | -1.343030 | -3.033529 |
| C  | -3.953602 | -2.228801 | -1.168841 |
| C  | -3.861375 | -1.183869 | -3.769281 |
| H  | -1.719525 | -1.094862 | -3.466125 |
| C  | -5.120847 | -2.081732 | -1.922535 |
| C  | -5.083934 | -1.549661 | -3.209279 |
| H  | -3.811571 | -0.790282 | -4.787100 |
| H  | -6.069014 | -2.380321 | -1.471522 |
| H  | -6.010303 | -1.433674 | -3.775934 |
| S  | -4.124830 | -2.931576 | 0.479519  |
| O  | -5.556789 | -2.747143 | 0.854278  |
| O  | -3.254741 | -2.092234 | 1.361113  |
| O  | -3.712709 | -4.342818 | 0.369074  |
| Cu | -1.095422 | 0.960712  | -1.674004 |
| C  | -0.651597 | -4.105507 | -1.705130 |
| C  | -1.222968 | -5.381551 | -1.725344 |
| C  | 0.149214  | -3.696851 | -2.780504 |
| C  | -0.987763 | -6.242727 | -2.798837 |
| H  | -1.865176 | -5.690489 | -0.896156 |
| C  | 0.380397  | -4.554902 | -3.852802 |
| H  | 0.592538  | -2.693894 | -2.781704 |

|    |           |           |           |
|----|-----------|-----------|-----------|
| C  | -0.186805 | -5.831794 | -3.863324 |
| H  | -1.438992 | -7.237971 | -2.804607 |
| H  | 1.004993  | -4.225081 | -4.686989 |
| H  | -0.006041 | -6.503819 | -4.705821 |
| N  | -1.493494 | -1.895878 | -1.008293 |
| N  | 0.412783  | -1.260092 | -0.175183 |
| C  | -2.245151 | 2.679084  | -1.854624 |
| C  | -1.633680 | 3.907862  | -2.358728 |
| C  | -1.682092 | 4.184327  | -3.739099 |
| C  | -1.012669 | 4.850816  | -1.516697 |
| C  | -1.129979 | 5.350898  | -4.259171 |
| C  | -0.471711 | 6.022545  | -2.037873 |
| C  | -0.523068 | 6.278004  | -3.409879 |
| H  | -1.180117 | 5.542499  | -5.333803 |
| H  | -0.009831 | 6.747906  | -1.363276 |
| H  | -0.097921 | 7.199561  | -3.814512 |
| C  | -2.254695 | 2.272765  | -0.503110 |
| C  | -3.129552 | 1.286846  | -0.004009 |
| H  | -2.886547 | 0.786415  | 0.935552  |
| H  | -3.721453 | 0.697986  | -0.711719 |
| H  | -0.968681 | 4.679713  | -0.437662 |
| H  | -1.626092 | 2.801085  | 0.221680  |
| P  | -5.287415 | 1.615086  | 1.915102  |
| O  | -6.278088 | 0.401268  | 1.400183  |
| O  | -4.480211 | 0.939751  | 2.990154  |
| O  | -6.291220 | 2.765265  | 2.448534  |
| O  | -4.617982 | 2.268560  | 0.695856  |
| Na | -5.016952 | -1.252850 | 2.611295  |
| H  | -3.002972 | 2.230881  | -2.513628 |
| H  | -2.166822 | 3.465118  | -4.405640 |
| C  | -7.125052 | 0.585350  | 0.276457  |
| H  | -7.708243 | -0.333464 | 0.144635  |
| H  | -7.819574 | 1.425162  | 0.434256  |
| H  | -6.544268 | 0.777720  | -0.638381 |
| C  | -7.098171 | 2.494548  | 3.587715  |
| H  | -7.681682 | 3.398233  | 3.797106  |
| H  | -7.794911 | 1.662462  | 3.400642  |
| H  | -6.484716 | 2.255884  | 4.468846  |
| C  | 1.450633  | -0.444965 | 0.324169  |
| C  | 2.627782  | -1.030646 | 0.812008  |
| C  | 1.290157  | 0.940712  | 0.426072  |
| C  | 3.629673  | -0.247109 | 1.398756  |
| C  | 2.275775  | 1.734933  | 1.008056  |
| C  | 3.446245  | 1.136605  | 1.487124  |
| H  | 4.207057  | 1.754548  | 1.973087  |
| H  | 0.361507  | 1.418278  | 0.110160  |
| H  | 2.770595  | -2.111520 | 0.762795  |
| C  | 2.024071  | 3.192354  | 1.177701  |
| C  | 2.532424  | 4.107744  | 0.228173  |
| C  | 1.260292  | 3.632228  | 2.282240  |
| C  | 2.260036  | 5.469396  | 0.401142  |
| C  | 1.000384  | 5.003963  | 2.407119  |
| C  | 1.496211  | 5.914411  | 1.478317  |
| H  | 2.642930  | 6.193836  | -0.322814 |
| H  | 0.403680  | 5.365500  | 3.249234  |
| H  | 1.286417  | 6.981257  | 1.594700  |
| C  | 4.866920  | -0.867777 | 1.960546  |
| C  | 4.831871  | -1.477355 | 3.240108  |
| C  | 6.071701  | -0.816467 | 1.223610  |
| C  | 6.018026  | -2.006252 | 3.762734  |
| C  | 7.235611  | -1.350924 | 1.793018  |
| C  | 7.212850  | -1.938454 | 3.051866  |
| H  | 6.011504  | -2.479904 | 4.746720  |
| H  | 8.175238  | -1.309203 | 1.236041  |
| H  | 8.128870  | -2.353190 | 3.480791  |
| C  | 6.141981  | -0.189075 | -0.157924 |
| H  | 5.116438  | -0.168514 | -0.568305 |
| C  | 7.004347  | -0.998895 | -1.118384 |
| H  | 6.720639  | -2.061230 | -1.135414 |
| H  | 6.915701  | -0.611817 | -2.143083 |
| H  | 8.072194  | -0.948760 | -0.856771 |
| C  | 6.635452  | 1.253680  | -0.087623 |
| H  | 5.994701  | 1.883853  | 0.546234  |
| H  | 7.654804  | 1.301793  | 0.327566  |
| H  | 6.668073  | 1.711472  | -1.088397 |
| C  | 3.555061  | -1.509401 | 4.064670  |
| H  | 2.710709  | -1.643111 | 3.364132  |
| C  | 3.337962  | -0.180162 | 4.786150  |
| H  | 2.373611  | -0.173402 | 5.317594  |
| H  | 4.128467  | -0.004576 | 5.533283  |
| H  | 3.345168  | 0.676647  | 4.097170  |
| C  | 3.503274  | -2.657348 | 5.061317  |
| H  | 2.516005  | -2.703711 | 5.542383  |

|    |           |           |           |
|----|-----------|-----------|-----------|
| H  | 3.687247  | -3.632441 | 4.586251  |
| H  | 4.239139  | -2.537808 | 5.871327  |
| C  | 0.705268  | 2.654453  | 3.307293  |
| H  | 1.285456  | 1.719308  | 3.223498  |
| C  | 3.279522  | 3.609150  | -0.995960 |
| H  | 3.769386  | 2.658692  | -0.720055 |
| C  | 2.289827  | 3.291013  | -2.115231 |
| H  | 1.500019  | 2.601734  | -1.776714 |
| H  | 1.795191  | 4.206697  | -2.478505 |
| H  | 2.791897  | 2.819022  | -2.974158 |
| C  | 4.366366  | 4.552953  | -1.484643 |
| H  | 3.953752  | 5.491141  | -1.886314 |
| H  | 5.077307  | 4.816578  | -0.687372 |
| H  | 4.939683  | 4.088242  | -2.300426 |
| C  | -0.748967 | 2.297251  | 3.006332  |
| H  | -1.155627 | 1.609957  | 3.763912  |
| H  | -0.848654 | 1.800866  | 2.030032  |
| H  | -1.396428 | 3.189374  | 2.992958  |
| C  | 0.860537  | 3.148197  | 4.739116  |
| H  | 1.902692  | 3.412591  | 4.972649  |
| H  | 0.239976  | 4.033180  | 4.946305  |
| H  | 0.548475  | 2.370169  | 5.451273  |
| H  | -0.622102 | -0.975154 | 2.144985  |
| H  | -0.837417 | -1.424826 | 4.570614  |
| C  | -0.278070 | -1.930395 | 2.550483  |
| C  | -0.406666 | -2.186547 | 3.915015  |
| C  | 0.269790  | -2.894765 | 1.697828  |
| C  | 0.003177  | -3.412308 | 4.440861  |
| H  | -0.101585 | -3.613958 | 5.509789  |
| C  | 0.696042  | -4.114677 | 2.235434  |
| C  | 0.557148  | -4.376123 | 3.597608  |
| H  | 1.132470  | -4.869997 | 1.574050  |
| H  | 0.891130  | -5.334331 | 4.003479  |
| C  | -0.215048 | 1.144757  | -3.506802 |
| H  | 0.047498  | 2.208944  | -3.623871 |
| H  | -1.010112 | 0.901485  | -4.232221 |
| C  | 0.924019  | 0.312864  | -3.632873 |
| C  | 1.935629  | -0.395520 | -3.688649 |
| Si | 3.560228  | -1.204485 | -3.924416 |
| C  | 3.886658  | -2.466147 | -2.573109 |
| H  | 3.898690  | -2.014858 | -1.568399 |
| H  | 3.117355  | -3.254666 | -2.571693 |
| H  | 4.855485  | -2.967361 | -2.726564 |
| C  | 4.848965  | 0.161476  | -3.911090 |
| H  | 4.612706  | 0.918919  | -4.674769 |
| H  | 5.854699  | -0.225299 | -4.137699 |
| H  | 4.893857  | 0.679533  | -2.940020 |
| C  | 3.607660  | -2.074294 | -5.587790 |
| H  | 2.853064  | -2.871676 | -5.660771 |
| H  | 3.426987  | -1.375253 | -6.418473 |
| H  | 4.591498  | -2.540282 | -5.756765 |

164

Scheme\_S3\_XIVb / electronic energy: -6142.87107506 a.u. / lowest freq: -254.37 cm<sup>-1</sup>

|    |           |           |           |
|----|-----------|-----------|-----------|
| C  | 0.671768  | 3.158881  | 0.873389  |
| H  | 1.296098  | 3.242079  | 1.774049  |
| C  | -0.618393 | 2.362287  | 1.208886  |
| H  | -1.507650 | 2.955052  | 0.935444  |
| C  | 0.634460  | 1.155328  | -0.380831 |
| C  | 2.577879  | 2.542938  | -0.712503 |
| C  | 2.586461  | 2.710030  | -2.102802 |
| C  | 3.786770  | 2.641943  | -0.001592 |
| C  | 3.770973  | 2.981970  | -2.781030 |
| H  | 1.638216  | 2.627736  | -2.640735 |
| C  | 4.970821  | 2.919155  | -0.690124 |
| C  | 4.966290  | 3.093099  | -2.071792 |
| H  | 3.756042  | 3.108710  | -3.865996 |
| H  | 5.901170  | 2.983135  | -0.122316 |
| H  | 5.900676  | 3.309293  | -2.594605 |
| S  | 3.879170  | 2.452506  | 1.781865  |
| O  | 5.295691  | 2.078586  | 2.078404  |
| O  | 2.978994  | 1.306902  | 2.124169  |
| O  | 3.464877  | 3.749391  | 2.344495  |
| Cu | 1.425600  | -0.228630 | -1.568666 |
| C  | 0.451489  | 4.537170  | 0.308683  |
| C  | 0.712213  | 5.659489  | 1.101852  |
| C  | -0.023103 | 4.719637  | -0.997259 |
| C  | 0.487426  | 6.943798  | 0.605470  |
| H  | 1.101702  | 5.519151  | 2.114168  |
| C  | -0.242314 | 6.002667  | -1.494892 |
| H  | -0.218999 | 3.846380  | -1.629679 |
| C  | 0.010778  | 7.117783  | -0.693416 |
| H  | 0.695209  | 7.813000  | 1.234177  |
| H  | -0.609599 | 6.135008  | -2.515492 |

|    |           |           |           |
|----|-----------|-----------|-----------|
| H  | -0.159071 | 8.123498  | -1.085363 |
| N  | 1.335181  | 2.252482  | -0.085794 |
| N  | -0.523131 | 1.189359  | 0.310687  |
| C  | 2.600670  | -1.927176 | -1.810820 |
| C  | 3.599642  | -1.713653 | -2.881166 |
| C  | 3.762375  | -2.650740 | -3.916925 |
| C  | 4.414411  | -0.562991 | -2.908355 |
| C  | 4.706505  | -2.454724 | -4.924813 |
| C  | 5.352096  | -0.366609 | -3.914876 |
| C  | 5.508117  | -1.315377 | -4.929945 |
| H  | 4.814297  | -3.204159 | -5.712832 |
| H  | 5.961998  | 0.540666  | -3.913310 |
| H  | 6.244357  | -1.160206 | -5.721967 |
| C  | 2.825476  | -1.338557 | -0.528321 |
| C  | 2.067700  | -1.596271 | 0.632050  |
| H  | 2.171703  | -0.900189 | 1.467852  |
| H  | 1.108739  | -2.113956 | 0.578130  |
| H  | 4.286410  | 0.209061  | -2.143077 |
| H  | 3.707985  | -0.703316 | -0.393048 |
| P  | 3.895687  | -2.700197 | 2.581594  |
| O  | 5.117366  | -1.884931 | 1.816607  |
| O  | 3.547092  | -1.772710 | 3.712366  |
| O  | 4.565122  | -4.098252 | 3.043557  |
| O  | 2.855564  | -3.130661 | 1.536723  |
| Na | 4.710846  | 0.093933  | 3.155939  |
| C  | 1.664427  | -3.093104 | -1.945213 |
| H  | 3.154159  | -3.557072 | -3.933218 |
| C  | 5.801366  | -2.493524 | 0.728479  |
| H  | 6.251224  | -1.700198 | 0.118693  |
| H  | 6.601265  | -3.157531 | 1.090060  |
| H  | 5.114460  | -3.080624 | 0.100076  |
| C  | 5.462430  | -4.096002 | 4.146900  |
| H  | 5.822240  | -5.123086 | 4.276290  |
| H  | 6.330616  | -3.443004 | 3.965416  |
| H  | 4.962980  | -3.773645 | 5.071764  |
| C  | -1.544216 | 0.217381  | 0.254962  |
| C  | -2.759205 | 0.448414  | 0.918618  |
| C  | -1.375612 | -0.988958 | -0.437376 |
| C  | -3.785497 | -0.500516 | 0.894138  |
| C  | -2.394386 | -1.945141 | -0.483800 |
| C  | -3.599709 | -1.691995 | 0.178274  |
| H  | -4.398089 | -2.440607 | 0.162175  |
| H  | -0.438844 | -1.218186 | -0.953555 |
| H  | -2.923990 | 1.376872  | 1.467012  |
| C  | -2.130237 | -3.232475 | -1.195017 |
| C  | -2.330340 | -3.324512 | -2.592341 |
| C  | -1.620149 | -4.333331 | -0.469144 |
| C  | -2.013337 | -4.524741 | -3.240166 |
| C  | -1.320831 | -5.516025 | -1.158312 |
| C  | -1.510249 | -5.612635 | -2.532382 |
| H  | -2.165070 | -4.610756 | -4.319123 |
| H  | -0.928063 | -6.374497 | -0.606463 |
| H  | -1.267101 | -6.541058 | -3.055926 |
| C  | -5.056015 | -0.260132 | 1.640175  |
| C  | -5.066458 | -0.299551 | 3.061580  |
| C  | -6.247694 | -0.006302 | 0.925300  |
| C  | -6.283989 | -0.108307 | 3.724049  |
| C  | -7.442271 | 0.177628  | 1.636296  |
| C  | -7.465300 | 0.121940  | 3.022282  |
| H  | -6.316830 | -0.140091 | 4.814560  |
| H  | -8.367325 | 0.373826  | 1.086122  |
| H  | -8.403668 | 0.266076  | 3.564201  |
| C  | -6.292641 | 0.119257  | -0.587717 |
| H  | -5.269855 | -0.014366 | -0.979395 |
| C  | -6.760676 | 1.510114  | -1.004658 |
| H  | -6.149572 | 2.301840  | -0.547489 |
| H  | -6.707736 | 1.636002  | -2.096328 |
| H  | -7.805829 | 1.692817  | -0.709645 |
| C  | -7.170151 | -0.959897 | -1.211576 |
| H  | -6.837675 | -1.971960 | -0.936156 |
| H  | -8.218257 | -0.863072 | -0.887219 |
| H  | -7.164499 | -0.893134 | -2.310152 |
| C  | -3.800554 | -0.580317 | 3.861136  |
| H  | -2.995075 | 0.044602  | 3.433777  |
| C  | -3.361234 | -2.035650 | 3.718994  |
| H  | -2.416356 | -2.217065 | 4.254744  |
| H  | -4.115940 | -2.720265 | 4.138536  |
| H  | -3.203782 | -2.323990 | 2.671289  |
| C  | -3.911376 | -0.217314 | 5.333434  |
| H  | -2.941310 | -0.353952 | 5.832026  |
| H  | -4.220101 | 0.826998  | 5.489516  |
| H  | -4.629601 | -0.860502 | 5.865003  |
| C  | -1.422199 | -4.280889 | 1.035363  |

|    |           |           |           |
|----|-----------|-----------|-----------|
| H  | -1.400026 | -3.218711 | 1.336543  |
| C  | -2.954357 | -2.184090 | -3.375050 |
| H  | -2.701005 | -1.240058 | -2.859864 |
| C  | -2.447879 | -2.069646 | -4.805184 |
| H  | -1.348985 | -2.057550 | -4.859361 |
| H  | -2.801101 | -2.896301 | -5.440860 |
| H  | -2.809566 | -1.139433 | -5.266942 |
| C  | -4.474851 | -2.324983 | -3.351264 |
| H  | -4.787682 | -3.286731 | -3.788780 |
| H  | -4.872113 | -2.287255 | -2.326013 |
| H  | -4.961684 | -1.527404 | -3.932263 |
| C  | -0.108974 | -4.906766 | 1.486735  |
| H  | -0.110901 | -6.001459 | 1.370852  |
| H  | 0.757124  | -4.515109 | 0.934763  |
| H  | 0.071280  | -4.701922 | 2.552641  |
| C  | -2.604247 | -4.935904 | 1.745462  |
| H  | -3.560706 | -4.458117 | 1.485562  |
| H  | -2.685225 | -5.999634 | 1.470018  |
| H  | -2.491583 | -4.887876 | 2.839056  |
| H  | 0.459639  | 0.170587  | 2.461493  |
| H  | 0.467188  | -0.331936 | 4.886373  |
| C  | -0.049891 | 0.841988  | 3.156192  |
| C  | -0.043362 | 0.563531  | 4.521788  |
| C  | -0.689599 | 1.986663  | 2.669264  |
| C  | -0.678106 | 1.427409  | 5.415506  |
| H  | -0.671966 | 1.210319  | 6.486498  |
| C  | -1.340042 | 2.839081  | 3.568190  |
| C  | -1.330953 | 2.563313  | 4.935290  |
| H  | -1.851360 | 3.730511  | 3.191255  |
| H  | -1.839987 | 3.237546  | 5.628595  |
| C  | 0.770395  | -0.032960 | -3.486101 |
| H  | 0.592731  | -1.044629 | -3.887905 |
| H  | 1.617077  | 0.421405  | -4.029292 |
| C  | -0.396328 | 0.771879  | -3.487687 |
| C  | -1.414956 | 1.469969  | -3.408371 |
| Si | -2.943081 | 2.480418  | -3.414377 |
| C  | -3.353846 | 3.107852  | -1.692638 |
| H  | -3.512699 | 2.275022  | -0.988959 |
| H  | -2.566483 | 3.754813  | -1.276887 |
| H  | -4.280702 | 3.703349  | -1.715950 |
| C  | -2.701329 | 3.938096  | -4.571472 |
| H  | -1.836651 | 4.554693  | -4.282509 |
| H  | -2.531995 | 3.607373  | -5.607511 |
| H  | -3.586608 | 4.593587  | -4.574904 |
| C  | -4.379761 | 1.425427  | -4.001131 |
| H  | -4.584401 | 0.614607  | -3.284798 |
| H  | -5.296144 | 2.030453  | -4.089558 |
| H  | -4.193183 | 0.968751  | -4.984826 |
| H  | 0.843836  | -3.069588 | -1.216591 |
| H  | 2.200025  | -4.045441 | -1.782365 |
| H  | 1.211670  | -3.146773 | -2.944866 |

164

Scheme\_S3\_XVb / electronic energy: -6142.86648284 a.u. / lowest freq: -294.57 cm<sup>-1</sup>

|    |           |           |           |
|----|-----------|-----------|-----------|
| C  | -0.846647 | 3.234821  | -0.006945 |
| H  | -1.531683 | 3.482276  | -0.829161 |
| C  | 0.467670  | 2.650590  | -0.584305 |
| H  | 1.330151  | 3.188751  | -0.156538 |
| C  | -0.616656 | 0.977179  | 0.685217  |
| C  | -2.566095 | 2.140071  | 1.531803  |
| C  | -2.440609 | 1.877010  | 2.901748  |
| C  | -3.837995 | 2.442625  | 1.007016  |
| C  | -3.552173 | 1.879489  | 3.739088  |
| H  | -1.441467 | 1.682170  | 3.298034  |
| C  | -4.946431 | 2.450610  | 1.858495  |
| C  | -4.811879 | 2.163734  | 3.214958  |
| H  | -3.427958 | 1.668301  | 4.803759  |
| H  | -5.925229 | 2.679214  | 1.432456  |
| H  | -5.692002 | 2.172464  | 3.861486  |
| S  | -4.122185 | 2.870516  | -0.717983 |
| O  | -5.579203 | 2.654580  | -0.956296 |
| O  | -3.325142 | 1.890600  | -1.521929 |
| O  | -3.693994 | 4.273229  | -0.861309 |
| Cu | -1.043851 | -0.715123 | 1.699365  |
| C  | -0.666150 | 4.453179  | 0.859790  |
| C  | -1.096457 | 5.700766  | 0.396081  |
| C  | -0.050087 | 4.366192  | 2.116169  |
| C  | -0.909002 | 6.846505  | 1.169416  |
| H  | -1.593385 | 5.763220  | -0.574903 |
| C  | 0.123663  | 5.509641  | 2.893947  |
| H  | 0.291015  | 3.392349  | 2.488543  |
| C  | -0.302915 | 6.752602  | 2.421302  |
| H  | -1.248634 | 7.815518  | 0.795514  |
| H  | 0.590255  | 5.434282  | 3.879082  |

|    |           |           |           |
|----|-----------|-----------|-----------|
| H  | -0.164831 | 7.647253  | 3.033366  |
| N  | -1.388914 | 2.073671  | 0.739250  |
| N  | 0.458537  | 1.265952  | -0.073614 |
| C  | -2.259435 | -2.411124 | 2.048428  |
| C  | -1.595430 | -3.616518 | 2.597096  |
| C  | -1.366470 | -3.752946 | 3.980637  |
| C  | -1.218788 | -4.691104 | 1.767295  |
| C  | -0.766813 | -4.894332 | 4.505680  |
| C  | -0.634945 | -5.839800 | 2.295894  |
| C  | -0.396755 | -5.946186 | 3.666375  |
| H  | -0.592634 | -4.964043 | 5.582256  |
| H  | -0.374896 | -6.665279 | 1.628457  |
| H  | 0.062051  | -6.847542 | 4.079962  |
| C  | -2.176375 | -2.137296 | 0.658473  |
| C  | -3.016567 | -1.259880 | -0.057453 |
| H  | -2.692217 | -0.913639 | -1.040800 |
| H  | -3.665669 | -0.558851 | 0.472887  |
| H  | -1.417789 | -4.649632 | 0.693752  |
| H  | -1.472655 | -2.726612 | 0.061329  |
| P  | -5.277595 | -1.784801 | -1.816960 |
| O  | -6.196798 | -0.563790 | -1.192833 |
| O  | -4.662101 | -1.140385 | -3.028140 |
| O  | -6.331091 | -2.965729 | -2.149375 |
| O  | -4.422252 | -2.385233 | -0.689699 |
| Na | -5.189588 | 1.044560  | -2.631563 |
| C  | -3.375090 | -1.813749 | 2.861783  |
| H  | -1.650898 | -2.946795 | 4.659809  |
| C  | -6.840379 | -0.714824 | 0.062302  |
| H  | -7.421523 | 0.195202  | 0.251518  |
| H  | -7.526784 | -1.575885 | 0.058092  |
| H  | -6.112202 | -0.853237 | 0.876571  |
| C  | -7.282455 | -2.760648 | -3.186186 |
| H  | -7.878068 | -3.676779 | -3.269039 |
| H  | -7.958638 | -1.922744 | -2.954696 |
| H  | -6.792593 | -2.568294 | -4.151871 |
| C  | 1.471488  | 0.355561  | -0.445588 |
| C  | 2.751719  | 0.817167  | -0.775122 |
| C  | 1.181723  | -1.005834 | -0.559001 |
| C  | 3.741622  | -0.078766 | -1.198525 |
| C  | 2.159871  | -1.916964 | -0.956548 |
| C  | 3.437245  | -1.443457 | -1.272657 |
| H  | 4.198086  | -2.145178 | -1.626373 |
| H  | 0.164581  | -1.360625 | -0.389593 |
| H  | 2.987060  | 1.882238  | -0.721739 |
| C  | 1.805781  | -3.357853 | -1.088556 |
| C  | 2.239148  | -4.279701 | -0.103157 |
| C  | 1.028503  | -3.783546 | -2.188094 |
| C  | 1.882863  | -5.624555 | -0.245845 |
| C  | 0.680891  | -5.139143 | -2.279327 |
| C  | 1.105893  | -6.052491 | -1.321494 |
| H  | 2.208411  | -6.352746 | 0.500815  |
| H  | 0.072650  | -5.482541 | -3.121279 |
| H  | 0.831585  | -7.107186 | -1.410838 |
| C  | 5.097304  | 0.403245  | -1.596429 |
| C  | 5.267588  | 1.071426  | -2.836827 |
| C  | 6.206898  | 0.164013  | -0.752486 |
| C  | 6.552672  | 1.487883  | -3.202958 |
| C  | 7.475298  | 0.591367  | -1.169739 |
| C  | 7.650143  | 1.248030  | -2.380889 |
| H  | 6.704206  | 2.002790  | -4.153862 |
| H  | 8.342317  | 0.405176  | -0.530703 |
| H  | 8.646394  | 1.576670  | -2.688241 |
| C  | 6.080060  | -0.561651 | 0.578188  |
| H  | 5.016439  | -0.542547 | 0.878879  |
| C  | 6.882242  | 0.105771  | 1.689324  |
| H  | 6.612141  | 1.163167  | 1.825243  |
| H  | 6.717635  | -0.408516 | 2.646664  |
| H  | 7.965038  | 0.064061  | 1.498031  |
| C  | 6.499202  | -2.024541 | 0.446906  |
| H  | 5.915856  | -2.565443 | -0.311965 |
| H  | 7.559575  | -2.105037 | 0.158825  |
| H  | 6.379274  | -2.556333 | 1.402900  |
| C  | 4.104690  | 1.262882  | -3.799355 |
| H  | 3.204288  | 1.490472  | -3.201127 |
| C  | 3.820662  | -0.030229 | -4.562990 |
| H  | 2.933749  | 0.077362  | -5.206516 |
| H  | 4.669936  | -0.299992 | -5.210954 |
| H  | 3.640372  | -0.881802 | -3.890755 |
| C  | 4.300213  | 2.414477  | -4.773399 |
| H  | 3.391252  | 2.566701  | -5.372057 |
| H  | 4.523102  | 3.362187  | -4.260555 |
| H  | 5.115893  | 2.222300  | -5.486914 |
| C  | 0.552953  | -2.821052 | -3.264448 |

|    |           |           |           |
|----|-----------|-----------|-----------|
| H  | 1.070969  | -1.859455 | -3.112493 |
| C  | 3.018000  | -3.797299 | 1.109193  |
| H  | 3.702884  | -3.006479 | 0.758120  |
| C  | 2.088012  | -3.154296 | 2.138544  |
| H  | 1.423986  | -2.397973 | 1.690853  |
| H  | 1.447085  | -3.910834 | 2.619626  |
| H  | 2.664269  | -2.653550 | 2.932580  |
| C  | 3.867993  | -4.872233 | 1.766204  |
| H  | 3.253080  | -5.657061 | 2.234128  |
| H  | 4.548904  | -5.361413 | 1.053582  |
| H  | 4.483150  | -4.438267 | 2.567558  |
| C  | -0.943171 | -2.552266 | -3.133525 |
| H  | -1.293047 | -1.833825 | -3.890265 |
| H  | -1.193562 | -2.139314 | -2.145670 |
| H  | -1.535827 | -3.472864 | -3.258099 |
| C  | 0.905718  | -3.297113 | -4.668383 |
| H  | 1.982242  | -3.496608 | -4.776221 |
| H  | 0.369641  | -4.218457 | -4.943383 |
| H  | 0.635306  | -2.534700 | -5.414524 |
| H  | -0.487810 | 0.841021  | -2.429879 |
| H  | -0.444176 | 1.045129  | -4.897898 |
| C  | -0.026607 | 1.718747  | -2.892655 |
| C  | -0.006094 | 1.834835  | -4.281700 |
| C  | 0.536767  | 2.718575  | -2.089787 |
| C  | 0.567492  | 2.955713  | -4.883937 |
| H  | 0.582915  | 3.046083  | -5.972976 |
| C  | 1.123605  | 3.832012  | -2.701121 |
| C  | 1.131092  | 3.954682  | -4.090069 |
| H  | 1.576097  | 4.611321  | -2.079906 |
| H  | 1.593137  | 4.829121  | -4.555212 |
| C  | -0.136541 | -0.708372 | 3.522152  |
| H  | 0.195412  | -1.743793 | 3.702888  |
| H  | -0.934294 | -0.460672 | 4.244120  |
| C  | 0.947684  | 0.201636  | 3.569939  |
| C  | 1.904104  | 0.986145  | 3.559578  |
| Si | 3.413301  | 1.999226  | 3.774343  |
| C  | 4.019605  | 2.657697  | 2.124160  |
| H  | 4.278675  | 1.848014  | 1.425005  |
| H  | 3.255479  | 3.285689  | 1.638592  |
| H  | 4.916662  | 3.283261  | 2.258098  |
| C  | 4.718372  | 0.908859  | 4.569286  |
| H  | 4.425329  | 0.637287  | 5.595295  |
| H  | 5.697377  | 1.409746  | 4.628862  |
| H  | 4.851876  | -0.031042 | 4.012985  |
| C  | 3.038803  | 3.446625  | 4.906869  |
| H  | 2.285691  | 4.120616  | 4.472501  |
| H  | 2.659525  | 3.113847  | 5.884904  |
| H  | 3.944495  | 4.045956  | 5.090657  |
| H  | -3.687446 | -0.825013 | 2.499217  |
| H  | -3.111569 | -1.699137 | 3.920883  |
| H  | -4.262328 | -2.469540 | 2.823444  |

136

Scheme\_S4\_XXII / electronic energy: -5523.50479848 a.u. / lowest freq: -321.98 cm<sup>-1</sup>

|    |           |           |           |
|----|-----------|-----------|-----------|
| C  | 1.276246  | -2.591188 | 0.106262  |
| H  | 0.578327  | -3.425104 | 0.253968  |
| C  | 1.638707  | -1.966847 | 1.478142  |
| H  | 2.730742  | -1.989342 | 1.618596  |
| C  | 0.563966  | -0.333990 | 0.145793  |
| C  | 0.119796  | -1.535287 | -1.909944 |
| C  | 0.622171  | -0.588139 | -2.813854 |
| C  | -0.815133 | -2.484932 | -2.367066 |
| C  | 0.206584  | -0.575997 | -4.142428 |
| H  | 1.359537  | 0.136392  | -2.447423 |
| C  | -1.217050 | -2.467675 | -3.705323 |
| C  | -0.714652 | -1.520295 | -4.592489 |
| H  | 0.613562  | 0.166205  | -4.833691 |
| H  | -1.948752 | -3.207116 | -4.036202 |
| H  | -1.040515 | -1.523348 | -5.634766 |
| C  | 1.222958  | 0.367481  | 2.383450  |
| C  | 0.018843  | 0.964541  | 2.774912  |
| C  | 2.422371  | 0.653037  | 3.060300  |
| C  | -0.046485 | 1.865617  | 3.839239  |
| C  | 2.344355  | 1.535121  | 4.149673  |
| C  | 1.149484  | 2.134310  | 4.524390  |
| H  | 1.151335  | 2.833735  | 5.364530  |
| S  | -1.537095 | -3.753619 | -1.316119 |
| O  | -2.788713 | -4.187362 | -2.003762 |
| O  | -1.881743 | -3.063649 | -0.030700 |
| O  | -0.521821 | -4.813162 | -1.188736 |
| Cu | -0.148231 | 1.437490  | -0.480706 |
| C  | 2.463215  | -3.079535 | -0.681709 |
| C  | 2.723338  | -4.452393 | -0.753460 |
| C  | 3.335492  | -2.184434 | -1.316221 |

|    |           |           |           |
|----|-----------|-----------|-----------|
| C  | 3.842277  | -4.925907 | -1.437911 |
| H  | 2.030929  | -5.150012 | -0.275524 |
| C  | 4.448050  | -2.660115 | -2.008969 |
| H  | 3.142292  | -1.105749 | -1.270332 |
| C  | 4.705882  | -4.030769 | -2.068866 |
| H  | 4.035159  | -6.000486 | -1.486093 |
| H  | 5.120669  | -1.956775 | -2.506189 |
| H  | 5.578596  | -4.400505 | -2.612830 |
| N  | 0.570303  | -1.473256 | -0.567184 |
| N  | 1.191836  | -0.561413 | 1.308211  |
| C  | -1.999906 | 1.235475  | -1.376674 |
| Na | -4.162909 | -3.416397 | -0.250998 |
| C  | -1.585887 | 2.601250  | -1.456333 |
| C  | -2.075752 | 3.689495  | -0.575352 |
| C  | -1.018441 | 3.038734  | -2.781787 |
| C  | -1.393970 | 4.924573  | -0.536123 |
| C  | -3.265677 | 3.582906  | 0.170752  |
| C  | -2.584835 | 0.552879  | -0.279147 |
| C  | -1.857288 | 5.983761  | 0.237545  |
| H  | -0.478646 | 5.056217  | -1.117181 |
| C  | -3.728180 | 4.647390  | 0.943917  |
| H  | -3.865886 | 2.673814  | 0.113160  |
| C  | -3.027204 | 5.851060  | 0.988805  |
| H  | -1.300879 | 6.924440  | 0.250042  |
| H  | -4.658647 | 4.533027  | 1.506838  |
| H  | -3.392898 | 6.683820  | 1.594642  |
| C  | 1.320529  | 2.772784  | -0.095779 |
| O  | -5.123415 | -1.621951 | 0.762798  |
| H  | -7.851016 | -1.622735 | 0.300553  |
| C  | -7.806971 | -1.092486 | -0.661705 |
| P  | -5.238455 | -0.654796 | -0.380490 |
| H  | -8.739210 | -0.533685 | -0.800952 |
| H  | -7.715833 | -1.831133 | -1.473637 |
| O  | -4.815120 | -1.577650 | -1.675153 |
| O  | -6.741032 | -0.150672 | -0.691098 |
| O  | -4.436622 | 0.661911  | -0.418528 |
| C  | -4.753500 | -1.026957 | -2.982769 |
| H  | -5.728335 | -0.618646 | -3.290282 |
| H  | -4.476905 | -1.835865 | -3.669029 |
| H  | -4.001487 | -0.225965 | -3.045502 |
| H  | -2.563596 | 1.002017  | 0.716311  |
| H  | -2.496268 | -0.538795 | -0.277864 |
| C  | 0.984759  | -2.625796 | 2.664490  |
| C  | 1.753757  | -3.359565 | 3.572822  |
| C  | -0.397698 | -2.520419 | 2.869004  |
| C  | 1.153406  | -3.982178 | 4.668382  |
| H  | 2.834034  | -3.442125 | 3.417008  |
| C  | -0.996258 | -3.135898 | 3.965447  |
| H  | -1.008292 | -1.958607 | 2.156085  |
| C  | -0.221669 | -3.868655 | 4.868187  |
| H  | 1.764902  | -4.553348 | 5.371233  |
| H  | -2.075048 | -3.044923 | 4.116450  |
| H  | -0.692287 | -4.349717 | 5.729155  |
| H  | -0.880735 | 0.682865  | 2.223508  |
| H  | 3.264253  | 1.782393  | 4.686628  |
| H  | 5.701994  | 2.077654  | -1.291606 |
| C  | 5.235786  | 2.831890  | -1.940280 |
| H  | 5.996238  | 3.172503  | -2.657001 |
| H  | 4.647741  | 4.138605  | -4.672436 |
| H  | 5.087735  | 0.385206  | -2.960822 |
| C  | 4.024571  | 2.232160  | -2.637883 |
| C  | 4.440670  | 1.075996  | -3.520501 |
| H  | 5.014933  | 1.430711  | -4.389027 |
| C  | 3.149088  | 3.317307  | -3.344649 |
| H  | 2.780140  | 2.368310  | -5.277889 |
| C  | 2.228474  | 2.722238  | -4.395495 |
| H  | 3.579555  | 0.502313  | -3.889662 |
| H  | 1.661305  | 1.877290  | -3.981119 |
| H  | 1.506479  | 3.479210  | -4.732650 |
| H  | 4.955222  | 3.686053  | -1.307275 |
| H  | 4.475126  | 5.031884  | -3.141881 |
| O  | 3.131065  | 1.747736  | -1.611719 |
| C  | 3.926368  | 4.482191  | -3.916620 |
| H  | 3.245329  | 5.191609  | -4.407169 |
| B  | 2.246195  | 2.782914  | -1.303039 |
| O  | 2.316897  | 3.787666  | -2.259690 |
| H  | 1.793020  | 2.359832  | 0.808950  |
| H  | 0.858544  | 3.742518  | 0.144206  |
| H  | -1.862664 | 0.639640  | -2.286242 |
| H  | -0.133967 | 3.681781  | -2.678423 |
| H  | -1.766108 | 3.612355  | -3.356319 |
| H  | -0.723706 | 2.174798  | -3.394490 |
| C  | 4.601297  | -0.475545 | 3.564123  |

|   |           |           |           |
|---|-----------|-----------|-----------|
| C | 5.835909  | -0.984327 | 3.163149  |
| H | 6.490853  | -1.459051 | 3.898120  |
| C | 3.735535  | 0.122091  | 2.634692  |
| C | 6.231772  | -0.894579 | 1.828032  |
| H | 7.197516  | -1.296594 | 1.512281  |
| C | 5.388095  | -0.281339 | 0.900375  |
| C | 4.151179  | 0.223104  | 1.296538  |
| H | 3.505671  | 0.709580  | 0.559040  |
| H | 5.694193  | -0.194841 | -0.146413 |
| H | 4.288694  | -0.562146 | 4.608972  |
| C | -1.345013 | 2.547948  | 4.264958  |
| C | -1.210571 | 4.050347  | 3.991026  |
| C | -1.586661 | 2.318080  | 5.760309  |
| C | -2.546270 | 2.015205  | 3.491516  |
| H | -0.780308 | 2.729792  | 6.383754  |
| H | -1.674190 | 1.246273  | 5.994536  |
| H | -2.521095 | 2.804946  | 6.077844  |
| H | -0.383868 | 4.497823  | 4.562558  |
| H | -2.132940 | 4.583688  | 4.269303  |
| H | -1.020043 | 4.245156  | 2.923703  |
| H | -2.459905 | 2.221040  | 2.414450  |
| H | -3.468670 | 2.506586  | 3.834610  |
| H | -2.681945 | 0.930340  | 3.622946  |

136

Scheme\_S4\_XXIII / electronic energy: -5523.50179127 a.u. / lowest freq: -337.90 cm<sup>-1</sup>

|    |           |           |           |
|----|-----------|-----------|-----------|
| C  | 0.023099  | 2.938392  | -0.705289 |
| H  | 0.818720  | 3.512655  | -0.213263 |
| C  | -1.149682 | 2.697844  | 0.279447  |
| H  | -2.083356 | 3.073595  | -0.168608 |
| C  | -0.248511 | 0.609486  | -0.380374 |
| C  | 1.531823  | 1.251944  | -1.895563 |
| C  | 1.232384  | 0.376424  | -2.948300 |
| C  | 2.841617  | 1.761951  | -1.788385 |
| C  | 2.202333  | 0.002083  | -3.873151 |
| H  | 0.212591  | -0.006539 | -3.028216 |
| C  | 3.801953  | 1.395024  | -2.735357 |
| C  | 3.492762  | 0.518491  | -3.771999 |
| H  | 1.939977  | -0.684650 | -4.681299 |
| H  | 4.812464  | 1.793717  | -2.627364 |
| H  | 4.261517  | 0.238098  | -4.495681 |
| S  | 3.380627  | 2.843925  | -0.455667 |
| O  | 4.865733  | 2.705550  | -0.398730 |
| O  | 2.773607  | 2.265748  | 0.786176  |
| O  | 2.917463  | 4.201167  | -0.792568 |
| Cu | -0.208040 | -1.362818 | -0.715315 |
| C  | -0.386341 | 3.636040  | -1.976165 |
| C  | 0.069148  | 4.928091  | -2.253455 |
| C  | -1.249353 | 3.006512  | -2.883584 |
| C  | -0.339305 | 5.585535  | -3.414939 |
| H  | 0.758738  | 5.409601  | -1.556086 |
| C  | -1.652842 | 3.660014  | -4.045497 |
| H  | -1.605050 | 1.991127  | -2.674105 |
| C  | -1.199181 | 4.953837  | -4.312565 |
| H  | 0.022077  | 6.595860  | -3.622053 |
| H  | -2.324403 | 3.158478  | -4.746940 |
| H  | -1.514436 | 5.467249  | -5.224231 |
| N  | 0.499125  | 1.555867  | -0.971714 |
| N  | -1.203775 | 1.213611  | 0.343391  |
| C  | 1.084230  | -2.390513 | 0.511318  |
| Na | 4.795555  | 1.683684  | 1.730234  |
| C  | 0.716156  | -3.268761 | -0.541233 |
| C  | 1.536308  | -3.476379 | -1.761820 |
| C  | -0.269031 | -4.353535 | -0.220279 |
| C  | 0.937559  | -3.942556 | -2.949383 |
| C  | 2.933495  | -3.300177 | -1.761620 |
| C  | 2.086836  | -1.385721 | 0.519993  |
| C  | 1.692197  | -4.174878 | -4.094860 |
| H  | -0.140373 | -4.119188 | -2.975831 |
| C  | 3.688028  | -3.534700 | -2.910768 |
| H  | 3.441678  | -3.024183 | -0.835540 |
| C  | 3.073035  | -3.962769 | -4.086409 |
| H  | 1.197911  | -4.528859 | -5.003124 |
| H  | 4.772327  | -3.393503 | -2.877961 |
| H  | 3.665081  | -4.147428 | -4.986109 |
| C  | -1.659237 | -1.627419 | -2.114429 |
| O  | 4.342738  | -0.234254 | 2.891779  |
| H  | 6.188007  | -1.978654 | -0.449140 |
| C  | 5.704131  | -0.998409 | -0.581996 |
| P  | 4.672759  | -1.279631 | 1.865014  |
| H  | 4.805758  | -1.122363 | -1.205745 |
| H  | 6.404425  | -0.332003 | -1.099659 |
| O  | 5.790623  | -2.349624 | 2.327603  |
| O  | 5.384462  | -0.403580 | 0.667908  |

|   |           |           |           |
|---|-----------|-----------|-----------|
| O | 3.588928  | -2.189306 | 1.249112  |
| C | 6.942101  | -1.889410 | 3.025037  |
| H | 7.524984  | -2.773013 | 3.308372  |
| H | 6.668691  | -1.336466 | 3.935254  |
| H | 7.568168  | -1.245877 | 2.387290  |
| H | 1.992728  | -0.594796 | 1.269046  |
| H | 2.545584  | -1.062199 | -0.419438 |
| C | -0.991301 | 3.320240  | 1.641055  |
| C | -1.852593 | 4.343276  | 2.048897  |
| C | 0.007109  | 2.876888  | 2.519015  |
| C | -1.719377 | 4.919651  | 3.313241  |
| H | -2.635760 | 4.688270  | 1.366300  |
| C | 0.135899  | 3.446434  | 3.783316  |
| H | 0.691043  | 2.084872  | 2.200432  |
| C | -0.727384 | 4.469635  | 4.183480  |
| H | -2.396857 | 5.720150  | 3.620392  |
| H | 0.916384  | 3.091481  | 4.461429  |
| H | -0.625321 | 4.915472  | 5.175999  |
| H | -1.890008 | -0.609101 | -2.470468 |
| H | -1.174161 | -2.185767 | -2.930731 |
| H | -4.498107 | -6.043208 | -1.330034 |
| C | -5.078051 | -5.109945 | -1.364358 |
| H | -6.009047 | -5.278069 | -0.803279 |
| H | -6.811643 | -3.006507 | -1.930810 |
| H | -3.075102 | -5.208782 | 0.528213  |
| C | -4.282907 | -3.971731 | -0.765129 |
| C | -3.754208 | -4.348654 | 0.610171  |
| H | -4.564393 | -4.629151 | 1.298364  |
| C | -5.016662 | -2.594694 | -0.750553 |
| H | -6.575735 | -3.064329 | 0.673396  |
| C | -5.794725 | -2.305845 | 0.514350  |
| H | -3.196015 | -3.514506 | 1.063199  |
| H | -5.151140 | -2.285853 | 1.402761  |
| H | -6.297030 | -1.330246 | 0.440685  |
| H | -5.338914 | -4.920292 | -2.413205 |
| H | -5.367405 | -2.628037 | -2.902117 |
| O | -3.144324 | -3.692180 | -1.612169 |
| C | -5.902028 | -2.390588 | -1.971025 |
| H | -6.213446 | -1.337531 | -2.023417 |
| B | -2.886955 | -2.327066 | -1.536919 |
| O | -3.913229 | -1.673429 | -0.863949 |
| H | 0.550292  | -2.536470 | 1.457211  |
| H | -0.853216 | -4.108880 | 0.676361  |
| H | 0.258540  | -5.304058 | -0.029576 |
| H | -0.983296 | -4.537780 | -1.032482 |
| H | -5.060481 | 0.276017  | 2.687723  |
| H | -3.853538 | -1.159983 | 4.258001  |
| C | -3.298618 | -0.692802 | 3.441283  |
| C | -1.918672 | -0.913951 | 3.306979  |
| C | -1.151270 | -1.781444 | 4.306725  |
| H | -6.298508 | 3.864499  | -1.800605 |
| C | -5.699057 | 3.234822  | -1.138624 |
| H | -6.520299 | 4.076752  | 0.674777  |
| C | -5.824530 | 3.351228  | 0.245884  |
| C | -4.804002 | 2.305688  | -1.672677 |
| C | -5.059087 | 2.545990  | 1.088057  |
| C | -4.033096 | 1.506040  | -0.832228 |
| H | -5.149943 | 2.652795  | 2.173055  |
| C | -4.145429 | 1.616916  | 0.563883  |
| C | -3.353113 | 0.763779  | 1.474693  |
| C | -3.984596 | 0.130566  | 2.557125  |
| C | -1.972972 | 0.532934  | 1.327871  |
| C | -1.284810 | -0.288820 | 2.230435  |
| H | -0.205279 | -0.375364 | 2.098384  |
| H | -4.709778 | 2.197764  | -2.756653 |
| H | -3.349560 | 0.766702  | -1.253241 |
| C | -1.667342 | -1.540583 | 5.728539  |
| C | 0.346651  | -1.469836 | 4.292163  |
| C | -1.364909 | -3.255229 | 3.940846  |
| H | 0.545685  | -0.399432 | 4.459838  |
| H | 0.839547  | -1.756263 | 3.351803  |
| H | 0.855931  | -2.028482 | 5.090767  |
| H | -1.582150 | -0.482144 | 6.017834  |
| H | -1.080629 | -2.129561 | 6.448816  |
| H | -2.716989 | -1.838703 | 5.856334  |
| H | -2.430337 | -3.530136 | 3.973101  |
| H | -0.829837 | -3.914750 | 4.641556  |
| H | -0.995135 | -3.479390 | 2.928188  |

99

Scheme\_S5\_XXIV / electronic energy: -4770.78820038 a.u. / lowest freq: -322.76 cm-1

|   |           |          |          |
|---|-----------|----------|----------|
| C | -0.564695 | 3.197298 | 0.809182 |
| H | 0.336237  | 3.442984 | 1.384617 |
| C | -1.710700 | 2.810413 | 1.756278 |

|    |           |           |           |
|----|-----------|-----------|-----------|
| C  | -1.308540 | 1.004504  | 0.325426  |
| C  | 0.648703  | 1.697668  | -0.893343 |
| C  | 0.256028  | 1.324476  | -2.184830 |
| C  | 2.022587  | 1.772587  | -0.593335 |
| C  | 1.200981  | 1.045584  | -3.166948 |
| H  | -0.814033 | 1.268054  | -2.400782 |
| C  | 2.965647  | 1.521897  | -1.593766 |
| C  | 2.559866  | 1.160530  | -2.875822 |
| H  | 0.871809  | 0.756722  | -4.167791 |
| H  | 4.027478  | 1.579726  | -1.350002 |
| H  | 3.309406  | 0.962556  | -3.644865 |
| C  | -3.103271 | 0.675400  | 1.909909  |
| C  | -2.688135 | -0.185702 | 2.944000  |
| C  | -4.439557 | 0.746683  | 1.478073  |
| C  | -3.659359 | -0.997951 | 3.543651  |
| C  | -5.374130 | -0.086691 | 2.104580  |
| C  | -4.987562 | -0.950256 | 3.127243  |
| H  | -5.730091 | -1.595522 | 3.603541  |
| S  | 2.594448  | 2.120310  | 1.072683  |
| O  | 4.023723  | 1.545049  | 1.078297  |
| O  | 1.719737  | 1.384843  | 1.997288  |
| O  | 2.669727  | 3.574242  | 1.235060  |
| Cu | -1.562000 | -0.757295 | -0.522211 |
| C  | -0.850133 | 4.324156  | -0.151818 |
| C  | -0.003709 | 5.436404  | -0.191756 |
| C  | -1.938598 | 4.263518  | -1.033427 |
| C  | -0.246313 | 6.479418  | -1.086976 |
| H  | 0.857667  | 5.474465  | 0.481029  |
| C  | -2.179452 | 5.302686  | -1.929022 |
| H  | -2.597752 | 3.388410  | -1.025546 |
| C  | -1.334746 | 6.415361  | -1.955266 |
| H  | 0.422354  | 7.343430  | -1.108184 |
| H  | -3.029678 | 5.244608  | -2.613015 |
| H  | -1.524657 | 7.229742  | -2.658676 |
| N  | -0.358134 | 1.917793  | 0.072031  |
| N  | -2.123188 | 1.490203  | 1.264733  |
| C  | -0.344296 | -2.192104 | 0.351868  |
| H  | -0.628212 | -2.363876 | 1.395262  |
| Al | 4.747519  | -0.118641 | 1.451605  |
| C  | -1.118158 | -2.742806 | -0.701782 |
| C  | -2.316250 | -3.563623 | -0.523900 |
| H  | -0.653003 | -2.791359 | -1.694753 |
| C  | -2.920754 | -4.151174 | -1.651197 |
| C  | -2.940756 | -3.736679 | 0.725951  |
| C  | 0.881184  | -1.518038 | 0.110740  |
| C  | 3.887046  | -1.003861 | 2.970129  |
| C  | 6.681127  | 0.124800  | 1.334343  |
| H  | 7.222164  | -0.836628 | 1.363719  |
| H  | 7.090975  | 0.734197  | 2.157171  |
| H  | 6.983341  | 0.624283  | 0.398010  |
| H  | 4.297941  | -2.017313 | 3.127869  |
| H  | 2.800175  | -1.126661 | 2.830080  |
| H  | 4.017852  | -0.466855 | 3.924839  |
| C  | -4.099722 | -4.881637 | -1.535728 |
| H  | -2.454424 | -4.015897 | -2.631553 |
| C  | -4.122016 | -4.463990 | 0.838989  |
| H  | -2.503971 | -3.288624 | 1.622593  |
| C  | -4.708962 | -5.040956 | -0.289615 |
| H  | -4.549874 | -5.327713 | -2.426199 |
| H  | -4.591146 | -4.580938 | 1.819598  |
| H  | -5.637432 | -5.609449 | -0.197802 |
| C  | -3.062029 | -0.729120 | -1.795627 |
| O  | 4.193741  | -1.012193 | -0.067371 |
| H  | 5.106934  | -3.007794 | -2.903271 |
| C  | 4.384798  | -2.178470 | -2.884322 |
| P  | 3.572466  | -2.372752 | -0.388760 |
| H  | 3.940179  | -2.071128 | -3.879485 |
| H  | 4.912175  | -1.250294 | -2.622077 |
| O  | 4.688305  | -3.460197 | -0.014078 |
| O  | 3.321233  | -2.452515 | -1.972439 |
| O  | 2.241418  | -2.738939 | 0.275970  |
| C  | 4.402126  | -4.854862 | -0.142944 |
| H  | 3.716597  | -5.186920 | 0.648170  |
| H  | 5.353530  | -5.387519 | -0.043879 |
| H  | 3.962871  | -5.086018 | -1.124171 |
| H  | 1.253866  | -0.828881 | 0.874417  |
| H  | 1.090105  | -1.214330 | -0.920933 |
| C  | -1.263023 | -0.224082 | 3.397043  |
| C  | -4.831666 | 1.670686  | 0.371776  |
| H  | -3.359120 | -1.678293 | 4.345552  |
| H  | -6.417508 | -0.053278 | 1.779538  |
| H  | -4.306946 | 1.420830  | -0.564330 |
| H  | -4.579739 | 2.717242  | 0.601906  |

|   |           |           |           |
|---|-----------|-----------|-----------|
| H | -5.909422 | 1.623366  | 0.172875  |
| H | -0.551753 | -0.244451 | 2.558451  |
| H | -1.069707 | -1.099463 | 4.030023  |
| H | -1.001312 | 0.666267  | 3.991166  |
| C | -3.147028 | -0.377295 | -3.090095 |
| H | -3.995932 | -1.143705 | -1.358491 |
| H | -2.259296 | 0.025679  | -3.608306 |
| C | -4.362560 | -0.486705 | -3.955335 |
| H | -5.220847 | -0.897805 | -3.402983 |
| H | -4.188917 | -1.136481 | -4.829865 |
| H | -4.668323 | 0.489293  | -4.368900 |
| H | -2.550083 | 3.521262  | 1.721213  |
| H | -1.376050 | 2.737610  | 2.802836  |

99

Scheme\_S5\_XKV / electronic energy: -4770.78638982 a.u. / lowest freq: -290.46 cm<sup>-1</sup>

|    |           |           |           |
|----|-----------|-----------|-----------|
| C  | -2.554726 | 2.215080  | 0.805130  |
| H  | -1.881164 | 2.907032  | 1.331383  |
| C  | -3.270378 | 1.291000  | 1.802294  |
| C  | -1.919247 | -0.039769 | 0.427659  |
| C  | -0.874454 | 1.585256  | -1.024813 |
| C  | -1.178845 | 1.126504  | -2.311780 |
| C  | 0.283269  | 2.359588  | -0.830513 |
| C  | -0.372625 | 1.461912  | -3.395918 |
| H  | -2.073134 | 0.512121  | -2.445749 |
| C  | 1.069987  | 2.720087  | -1.927800 |
| C  | 0.742593  | 2.276953  | -3.206683 |
| H  | -0.624147 | 1.092522  | -4.392535 |
| H  | 1.959244  | 3.332132  | -1.769671 |
| H  | 1.372828  | 2.558271  | -4.053440 |
| C  | -3.200918 | -1.237643 | 2.112205  |
| C  | -2.533828 | -1.601419 | 3.296129  |
| C  | -4.245467 | -2.011323 | 1.568765  |
| C  | -2.918130 | -2.796277 | 3.920877  |
| C  | -4.595468 | -3.194443 | 2.228750  |
| C  | -3.934004 | -3.586161 | 3.391580  |
| H  | -4.215285 | -4.516610 | 3.890981  |
| S  | 0.794048  | 2.875530  | 0.810771  |
| O  | 2.306556  | 3.091915  | 0.648652  |
| O  | 0.509873  | 1.773705  | 1.737955  |
| O  | 0.156723  | 4.164472  | 1.092048  |
| Cu | -0.887331 | -1.519035 | -0.406063 |
| C  | -3.440526 | 3.002775  | -0.126548 |
| C  | -3.205290 | 4.364603  | -0.338600 |
| C  | -4.468440 | 2.369582  | -0.838377 |
| C  | -3.993886 | 5.087310  | -1.235679 |
| H  | -2.390820 | 4.856301  | 0.201553  |
| C  | -5.254075 | 3.088916  | -1.735439 |
| H  | -4.648067 | 1.298886  | -0.693236 |
| C  | -5.019572 | 4.451812  | -1.933868 |
| H  | -3.802350 | 6.151830  | -1.391123 |
| H  | -6.052891 | 2.584910  | -2.285011 |
| H  | -5.636561 | 5.016342  | -2.637262 |
| N  | -1.734758 | 1.230786  | 0.041032  |
| N  | -2.802942 | -0.049919 | 1.427306  |
| C  | 1.116914  | -1.259753 | 0.039958  |
| H  | 1.451290  | -0.300235 | -0.374544 |
| Al | 3.937256  | 2.224420  | 0.567078  |
| C  | 0.907506  | -2.376146 | -0.816857 |
| C  | 1.270584  | -2.406313 | -2.235945 |
| H  | 0.809621  | -3.358934 | -0.337172 |
| C  | 1.807606  | -1.288373 | -2.900913 |
| C  | 1.105919  | -3.595467 | -2.972110 |
| C  | 1.105345  | -1.372306 | 1.451496  |
| C  | 5.159859  | 3.313779  | 1.637797  |
| C  | 4.350142  | 1.814563  | -1.305308 |
| H  | 3.619925  | 1.135867  | -1.778123 |
| H  | 5.330025  | 1.314311  | -1.399518 |
| H  | 4.406859  | 2.714705  | -1.941879 |
| H  | 6.216025  | 3.009925  | 1.540570  |
| H  | 4.920984  | 3.284657  | 2.714742  |
| H  | 5.121463  | 4.376982  | 1.344422  |
| C  | 2.165098  | -1.358045 | -4.244824 |
| H  | 1.955266  | -0.350307 | -2.360129 |
| C  | 1.461764  | -3.663380 | -4.315480 |
| H  | 0.689019  | -4.474195 | -2.471383 |
| C  | 1.994643  | -2.544531 | -4.960510 |
| H  | 2.585745  | -0.475845 | -4.735866 |
| H  | 1.325317  | -4.598399 | -4.864746 |
| H  | 2.277638  | -2.598398 | -6.014474 |
| C  | -2.040917 | -2.749023 | -1.412844 |
| O  | 3.614072  | 0.650268  | 1.456681  |
| H  | 6.257507  | 0.597317  | 2.779073  |
| C  | 6.372552  | -0.363958 | 2.259294  |

|   |           |           |           |
|---|-----------|-----------|-----------|
| P | 3.909318  | -0.849096 | 1.511405  |
| H | 7.200654  | -0.917982 | 2.713967  |
| H | 6.609924  | -0.183465 | 1.199381  |
| O | 4.293436  | -1.243018 | -0.002190 |
| O | 5.197305  | -1.161940 | 2.412205  |
| O | 2.812657  | -1.748446 | 2.087029  |
| C | 4.581894  | -2.599544 | -0.332349 |
| H | 5.492437  | -2.945953 | 0.179107  |
| H | 4.743777  | -2.642081 | -1.415065 |
| H | 3.746775  | -3.263650 | -0.065369 |
| H | 0.682716  | -2.276015 | 1.897792  |
| H | 0.987662  | -0.455009 | 2.030106  |
| C | -4.960761 | -1.574465 | 0.331110  |
| C | -1.469504 | -0.739651 | 3.897255  |
| C | -2.445097 | -3.949582 | -0.964705 |
| H | -2.444060 | -2.435236 | -2.396686 |
| H | -2.072166 | -4.315838 | 0.009026  |
| C | -3.408346 | -4.876117 | -1.635901 |
| H | -3.753276 | -4.481650 | -2.603505 |
| H | -4.301606 | -5.057130 | -1.012893 |
| H | -2.969913 | -5.871857 | -1.818537 |
| H | -2.404514 | -3.103375 | 4.836078  |
| H | -5.396624 | -3.814821 | 1.817466  |
| H | -5.654914 | -2.347530 | -0.022104 |
| H | -4.263345 | -1.349176 | -0.489702 |
| H | -5.550478 | -0.660489 | 0.506276  |
| H | -0.985592 | -0.080389 | 3.165187  |
| H | -0.691883 | -1.342554 | 4.385029  |
| H | -1.887841 | -0.086791 | 4.680228  |
| H | -2.998972 | 1.512922  | 2.845246  |
| H | -4.367487 | 1.351471  | 1.725883  |

112

Scheme\_S5\_XKVI / electronic energy: -5040.93702353 a.u. / lowest freq: -360.75 cm<sup>-1</sup>

|    |           |           |           |
|----|-----------|-----------|-----------|
| C  | 1.486936  | -2.572529 | -0.570652 |
| H  | 0.758850  | -3.202967 | -0.042678 |
| C  | 2.598215  | -2.105281 | 0.393586  |
| H  | 3.587210  | -2.235022 | -0.081630 |
| C  | 1.361244  | -0.220909 | -0.318705 |
| C  | -0.265426 | -1.172877 | -1.815835 |
| C  | -0.092157 | -0.467185 | -3.010590 |
| C  | -1.539391 | -1.678199 | -1.496246 |
| C  | -1.158099 | -0.282107 | -3.887100 |
| H  | 0.900128  | -0.066837 | -3.234187 |
| C  | -2.601505 | -1.506833 | -2.386792 |
| C  | -2.409851 | -0.815349 | -3.581515 |
| H  | -1.005335 | 0.271544  | -4.816213 |
| H  | -3.587843 | -1.888713 | -2.119724 |
| H  | -3.247657 | -0.684448 | -4.269764 |
| C  | 3.161701  | 0.254298  | 1.238484  |
| C  | 2.755137  | 0.646236  | 2.528528  |
| C  | 4.352472  | 0.731605  | 0.651571  |
| C  | 3.559890  | 1.567714  | 3.214618  |
| C  | 5.123180  | 1.646143  | 1.377750  |
| C  | 4.728273  | 2.064702  | 2.646914  |
| H  | 5.338100  | 2.785923  | 3.196976  |
| S  | -1.838803 | -2.437851 | 0.100443  |
| O  | -3.366269 | -2.303766 | 0.241893  |
| O  | -1.147300 | -1.609833 | 1.103090  |
| O  | -1.459435 | -3.852239 | 0.030284  |
| Cu | 0.884544  | 1.660123  | -0.696185 |
| C  | 1.964280  | -3.320826 | -1.787687 |
| C  | 1.483026  | -4.605151 | -2.057613 |
| C  | 2.871733  | -2.729509 | -2.677126 |
| C  | 1.911641  | -5.296279 | -3.192059 |
| H  | 0.763061  | -5.061204 | -1.372096 |
| C  | 3.296621  | -3.416666 | -3.811395 |
| H  | 3.239106  | -1.716723 | -2.479061 |
| C  | 2.818571  | -4.703998 | -4.069567 |
| H  | 1.531374  | -6.300966 | -3.391913 |
| H  | 4.002804  | -2.946816 | -4.500220 |
| H  | 3.152235  | -5.243285 | -4.959429 |
| N  | 0.840720  | -1.289246 | -0.941146 |
| N  | 2.340588  | -0.639969 | 0.485488  |
| C  | -0.812118 | 2.386233  | 0.282818  |
| C  | -0.824683 | 2.429418  | 1.783239  |
| Al | -4.364495 | -1.619792 | 1.659141  |
| C  | -0.192718 | 3.367050  | -0.554732 |
| C  | 0.582192  | 4.528998  | -0.084528 |
| H  | -0.638282 | 3.489845  | -1.550736 |
| C  | 0.305742  | 5.806486  | -0.598818 |
| C  | 1.637294  | 4.404102  | 0.838715  |
| C  | -1.721099 | 1.473088  | -0.338139 |
| C  | -3.492539 | -1.997444 | 3.368482  |

|   |           |           |           |
|---|-----------|-----------|-----------|
| C | -6.202736 | -2.172828 | 1.281177  |
| H | -6.945247 | -1.695748 | 1.943414  |
| H | -6.335481 | -3.260105 | 1.415617  |
| H | -6.510792 | -1.949252 | 0.245879  |
| H | -2.983647 | -2.976865 | 3.365575  |
| H | -4.192194 | -2.014668 | 4.221187  |
| H | -2.717063 | -1.250323 | 3.606917  |
| C | 1.036179  | 6.920695  | -0.186794 |
| H | -0.496594 | 5.922927  | -1.332994 |
| C | 2.367070  | 5.514746  | 1.250041  |
| H | 1.912316  | 3.407736  | 1.201159  |
| C | 2.065943  | 6.781585  | 0.743202  |
| H | 0.800250  | 7.904835  | -0.599772 |
| H | 3.188080  | 5.390191  | 1.961083  |
| H | 2.642721  | 7.653136  | 1.062036  |
| C | 2.321174  | 2.394418  | -1.839535 |
| O | -4.181977 | 0.191704  | 1.339437  |
| H | -6.238376 | 1.745096  | -2.042661 |
| C | -5.418930 | 1.027233  | -2.195335 |
| P | -4.511853 | 1.225138  | 0.261202  |
| H | -4.553336 | 1.557495  | -2.617890 |
| H | -5.752492 | 0.256734  | -2.898616 |
| O | -5.678432 | 2.214243  | 0.728011  |
| O | -5.078005 | 0.366489  | -0.977244 |
| O | -3.375936 | 2.165827  | -0.164005 |
| C | -6.901587 | 1.683294  | 1.243996  |
| H | -7.583057 | 2.529615  | 1.377964  |
| H | -6.739790 | 1.198101  | 2.216762  |
| H | -7.357259 | 0.965716  | 0.546172  |
| H | -1.888423 | 0.523717  | 0.178263  |
| H | -1.718558 | 1.407187  | -1.430894 |
| C | 2.648536  | -2.759286 | 1.753193  |
| C | 3.879072  | -2.803121 | 2.422275  |
| C | 1.511122  | -3.260231 | 2.399635  |
| C | 3.975383  | -3.329153 | 3.709438  |
| H | 4.772890  | -2.415133 | 1.923081  |
| C | 1.609648  | -3.800125 | 3.681490  |
| H | 0.531211  | -3.211971 | 1.918189  |
| C | 2.838465  | -3.833757 | 4.341427  |
| H | 4.943100  | -3.353362 | 4.216354  |
| H | 0.714029  | -4.190758 | 4.170861  |
| H | 2.910543  | -4.255016 | 5.347200  |
| C | 1.537278  | 0.088439  | 3.193208  |
| C | 4.785072  | 0.273146  | -0.703573 |
| H | 3.255106  | 1.891165  | 4.213915  |
| H | 6.041688  | 2.037287  | 0.931637  |
| H | 3.950030  | 0.256782  | -1.418808 |
| H | 5.203360  | -0.746688 | -0.675932 |
| H | 5.564605  | 0.926985  | -1.115710 |
| H | 0.799484  | -0.315442 | 2.488164  |
| H | 1.044366  | 0.845172  | 3.818401  |
| H | 1.814255  | -0.735205 | 3.871314  |
| C | 2.408316  | 2.519007  | -3.175442 |
| H | 3.200796  | 2.772110  | -1.276982 |
| H | 1.569282  | 2.183257  | -3.810937 |
| C | 3.566005  | 3.079785  | -3.940024 |
| H | 4.384635  | 3.390415  | -3.273156 |
| H | 3.280160  | 3.957537  | -4.544439 |
| H | 3.981056  | 2.351233  | -4.657412 |
| H | -1.034458 | 1.435552  | 2.204336  |
| H | -1.629942 | 3.098548  | 2.130889  |
| H | 0.106517  | 2.796375  | 2.229893  |

112

Scheme\_S5\_XXVII / electronic energy: -5040.93573303 a.u. / lowest freq: -374.19 cm<sup>-1</sup>

|   |           |           |           |
|---|-----------|-----------|-----------|
| C | 2.792470  | -0.771383 | -0.990651 |
| H | 2.433885  | -1.787800 | -1.211583 |
| C | 3.250414  | -0.666741 | 0.476236  |
| H | 4.170183  | -0.056663 | 0.532006  |
| C | 1.297024  | 0.634569  | 0.193166  |
| C | 0.827111  | 0.338688  | -2.160569 |
| C | 0.806362  | 1.592906  | -2.779239 |
| C | 0.022348  | -0.692547 | -2.675520 |
| C | 0.025317  | 1.813098  | -3.910413 |
| H | 1.421638  | 2.389634  | -2.352777 |
| C | -0.736288 | -0.476768 | -3.828639 |
| C | -0.730664 | 0.770473  | -4.447317 |
| H | 0.018360  | 2.798963  | -4.380611 |
| H | -1.361543 | -1.282227 | -4.217518 |
| H | -1.332237 | 0.930564  | -5.344382 |
| C | 2.191291  | 0.552210  | 2.457263  |
| C | 1.484620  | -0.189743 | 3.422906  |
| C | 2.950502  | 1.692317  | 2.797708  |
| C | 1.527369  | 0.259326  | 4.751171  |

|    |           |           |           |
|----|-----------|-----------|-----------|
| C  | 2.962657  | 2.099098  | 4.135886  |
| C  | 2.254037  | 1.390835  | 5.104686  |
| H  | 2.271097  | 1.724946  | 6.145090  |
| S  | -0.123134 | -2.268843 | -1.835166 |
| O  | -1.580561 | -2.658096 | -2.169628 |
| O  | 0.014025  | -2.033396 | -0.388736 |
| O  | 0.824529  | -3.209320 | -2.441160 |
| Cu | -0.120264 | 1.984404  | 0.530510  |
| C  | 3.839033  | -0.408593 | -2.011093 |
| C  | 4.232929  | -1.339623 | -2.976400 |
| C  | 4.421901  | 0.866148  | -2.013607 |
| C  | 5.204962  | -1.009125 | -3.922157 |
| H  | 3.769147  | -2.330630 | -2.984458 |
| C  | 5.388172  | 1.198441  | -2.959473 |
| H  | 4.108482  | 1.604329  | -1.267686 |
| C  | 5.784322  | 0.258789  | -3.914607 |
| H  | 5.508166  | -1.746066 | -4.669716 |
| H  | 5.835634  | 2.195313  | -2.953572 |
| H  | 6.544084  | 0.519052  | -4.655618 |
| N  | 1.640781  | 0.161009  | -1.015683 |
| N  | 2.156424  | 0.140525  | 1.089742  |
| C  | -2.041368 | 1.153966  | 0.400609  |
| C  | -2.466088 | 0.728010  | -0.976576 |
| Al | -2.691890 | -3.718702 | -1.111730 |
| C  | -2.081885 | 2.493185  | 0.878511  |
| C  | -2.577941 | 3.713210  | 0.238098  |
| H  | -2.012147 | 2.585987  | 1.970376  |
| C  | -2.808378 | 3.877022  | -1.142665 |
| C  | -2.788390 | 4.835953  | 1.065847  |
| C  | -1.772070 | 0.115170  | 1.357768  |
| C  | -1.637152 | -5.231355 | -0.462320 |
| C  | -4.350884 | -3.875166 | -2.133448 |
| H  | -4.712168 | -2.887409 | -2.466819 |
| H  | -5.174490 | -4.329077 | -1.556142 |
| H  | -4.236269 | -4.489549 | -3.042352 |
| H  | -2.220957 | -5.963616 | 0.121034  |
| H  | -0.817242 | -4.892428 | 0.194795  |
| H  | -1.161973 | -5.796245 | -1.282518 |
| C  | -3.236379 | 5.099491  | -1.658046 |
| H  | -2.639550 | 3.053591  | -1.835793 |
| C  | -3.215443 | 6.054427  | 0.550622  |
| H  | -2.599609 | 4.738626  | 2.139076  |
| C  | -3.443802 | 6.194781  | -0.819856 |
| H  | -3.404966 | 5.195774  | -2.733781 |
| H  | -3.368559 | 6.902655  | 1.222662  |
| H  | -3.777885 | 7.150495  | -1.230639 |
| C  | 0.713215  | 3.769322  | 0.710945  |
| O  | -3.002638 | -2.628999 | 0.340175  |
| H  | -4.871937 | -4.479391 | 1.436998  |
| C  | -5.534849 | -3.683735 | 1.807940  |
| P  | -3.943988 | -1.719549 | 1.120418  |
| H  | -6.061953 | -4.047600 | 2.695698  |
| H  | -6.272919 | -3.429948 | 1.033257  |
| O  | -4.995598 | -1.159476 | 0.042518  |
| O  | -4.785321 | -2.535053 | 2.210941  |
| O  | -3.286010 | -0.588535 | 1.928831  |
| C  | -5.945719 | -0.163496 | 0.423045  |
| H  | -6.669278 | -0.561342 | 1.149716  |
| H  | -6.479122 | 0.134561  | -0.485627 |
| H  | -5.449362 | 0.717393  | 0.855354  |
| H  | -1.416471 | 0.427241  | 2.343054  |
| H  | -1.309371 | -0.798826 | 0.975822  |
| C  | 3.513655  | -1.956586 | 1.214267  |
| C  | 4.441507  | -1.941810 | 2.264749  |
| C  | 2.833977  | -3.149332 | 0.933991  |
| C  | 4.683505  | -3.085732 | 3.023566  |
| H  | 4.982214  | -1.016069 | 2.486740  |
| C  | 3.084349  | -4.297290 | 1.684783  |
| H  | 2.085438  | -3.187155 | 0.139435  |
| C  | 4.004124  | -4.269308 | 2.733554  |
| H  | 5.410704  | -3.054161 | 3.838597  |
| H  | 2.547307  | -5.220070 | 1.451129  |
| H  | 4.195180  | -5.170850 | 3.320917  |
| C  | 3.738484  | 2.437584  | 1.768543  |
| C  | 0.731618  | -1.437606 | 3.086370  |
| H  | -1.882903 | 1.207471  | -1.775038 |
| H  | -3.523450 | 0.970828  | -1.170263 |
| H  | -2.349577 | -0.357273 | -1.103964 |
| C  | 0.677868  | 4.794947  | -0.158012 |
| H  | 1.270910  | 3.978639  | 1.647095  |
| H  | 0.130545  | 4.676360  | -1.111750 |
| C  | 1.282428  | 6.150774  | 0.025561  |
| H  | 1.831466  | 6.231560  | 0.976201  |

|   |           |           |           |
|---|-----------|-----------|-----------|
| H | 0.512608  | 6.942248  | 0.018459  |
| H | 1.981951  | 6.412579  | -0.786431 |
| H | 0.978794  | -0.300066 | 5.514086  |
| H | 3.536691  | 2.987103  | 4.414125  |
| H | 4.000673  | 3.443895  | 2.119537  |
| H | 3.191747  | 2.544326  | 0.820339  |
| H | 4.688041  | 1.926913  | 1.536710  |
| H | 0.580772  | -1.573127 | 2.008774  |
| H | -0.250997 | -1.458970 | 3.580023  |
| H | 1.273929  | -2.324900 | 3.450954  |

137

Scheme\_S6\_XXX / electronic energy: -5719.56183190 a.u. / lowest freq: -316.31 cm<sup>-1</sup>

|    |           |           |           |
|----|-----------|-----------|-----------|
| C  | -0.245364 | 2.640678  | 1.534989  |
| H  | -1.340136 | 2.751383  | 1.505132  |
| C  | 0.380855  | 3.385737  | 0.342685  |
| H  | 1.331299  | 3.855740  | 0.651409  |
| C  | 0.601952  | 1.061105  | -0.014538 |
| C  | -0.194919 | 0.186655  | 2.124184  |
| C  | 0.875661  | -0.480103 | 2.729930  |
| C  | -1.508157 | -0.157061 | 2.490682  |
| C  | 0.652492  | -1.440281 | 3.712439  |
| H  | 1.890781  | -0.207270 | 2.429653  |
| C  | -1.727435 | -1.106999 | 3.492985  |
| C  | -0.650579 | -1.736079 | 4.111886  |
| H  | 1.502225  | -1.947824 | 4.175433  |
| H  | -2.751663 | -1.361086 | 3.771611  |
| H  | -0.833760 | -2.472620 | 4.897007  |
| C  | 1.595099  | 2.518670  | -1.705286 |
| C  | 1.056999  | 2.695999  | -2.996941 |
| C  | 2.988908  | 2.596039  | -1.466292 |
| C  | 1.947470  | 2.922409  | -4.054751 |
| C  | 3.831751  | 2.815487  | -2.560992 |
| C  | 3.320285  | 2.972434  | -3.845577 |
| H  | 3.997032  | 3.141788  | -4.686788 |
| S  | -2.928104 | 0.604212  | 1.706556  |
| O  | -3.962209 | -0.539485 | 1.794859  |
| O  | -2.583716 | 0.883288  | 0.303642  |
| O  | -3.343042 | 1.747646  | 2.524413  |
| Cu | 0.879209  | -0.817640 | -0.672454 |
| C  | 0.234824  | 3.088341  | 2.889144  |
| C  | -0.646159 | 3.740280  | 3.757904  |
| C  | 1.560372  | 2.881409  | 3.293461  |
| C  | -0.207964 | 4.188052  | 5.004962  |
| H  | -1.685159 | 3.891171  | 3.451504  |
| C  | 1.997176  | 3.321739  | 4.540430  |
| H  | 2.254963  | 2.365544  | 2.622812  |
| C  | 1.112977  | 3.979309  | 5.398761  |
| H  | -0.905506 | 4.698022  | 5.673729  |
| H  | 3.032710  | 3.150840  | 4.844967  |
| H  | 1.455288  | 4.325741  | 6.376948  |
| N  | 0.094466  | 1.236579  | 1.217447  |
| N  | 0.725678  | 2.270687  | -0.588804 |
| C  | -1.004107 | -1.682112 | -0.908086 |
| H  | -1.514364 | -1.584035 | 0.057198  |
| Al | -5.446277 | -0.760486 | 0.686190  |
| H  | 4.911742  | 2.869783  | -2.398577 |
| C  | 0.027606  | -2.644674 | -1.076805 |
| C  | 3.596552  | 2.518691  | -0.076425 |
| C  | -0.427265 | 2.640018  | -3.296707 |
| H  | 1.549472  | 3.054355  | -5.064857 |
| C  | 0.383979  | -3.666538 | -0.095002 |
| H  | 0.321841  | -2.873672 | -2.109241 |
| C  | -0.111379 | -3.656052 | 1.220764  |
| C  | 1.263725  | -4.703153 | -0.459952 |
| C  | -1.605916 | -1.042656 | -2.018991 |
| C  | -6.097090 | 1.006615  | 0.160381  |
| C  | -6.602738 | -2.066108 | 1.574762  |
| H  | -6.057888 | -2.781698 | 2.213008  |
| H  | -7.184137 | -2.667142 | 0.853894  |
| H  | -7.345250 | -1.576332 | 2.227828  |
| H  | -6.298327 | 1.646012  | 1.037316  |
| H  | -7.036783 | 0.973097  | -0.416614 |
| H  | -5.366548 | 1.554188  | -0.458645 |
| C  | 0.250192  | -4.648615 | 2.129356  |
| H  | -0.792052 | -2.860597 | 1.536945  |
| C  | 1.622143  | -5.696198 | 0.445262  |
| H  | 1.667653  | -4.719355 | -1.476226 |
| C  | 1.114629  | -5.675846 | 1.747051  |
| H  | -0.150117 | -4.620224 | 3.146646  |
| H  | 2.304064  | -6.492081 | 0.135226  |
| H  | 1.394943  | -6.454723 | 2.460284  |
| H  | 2.812210  | 2.186318  | 0.621261  |
| C  | 4.075861  | 3.896161  | 0.377978  |

|    |           |           |           |
|----|-----------|-----------|-----------|
| C  | 4.727100  | 1.504268  | 0.031816  |
| H  | -0.950703 | 2.388182  | -2.359297 |
| C  | -0.755166 | 1.566973  | -4.330360 |
| C  | -0.937140 | 3.993892  | -3.779214 |
| O  | -4.640418 | -1.534190 | -0.762113 |
| H  | -3.275975 | -5.070992 | 0.714883  |
| C  | -3.825730 | -4.169648 | 0.422445  |
| P  | -4.005994 | -2.575920 | -1.671599 |
| H  | -3.705048 | -3.409664 | 1.210469  |
| H  | -4.891078 | -4.425734 | 0.321449  |
| O  | -5.226810 | -3.278406 | -2.435259 |
| O  | -3.270936 | -3.717802 | -0.809930 |
| O  | -2.977683 | -2.074283 | -2.691092 |
| C  | -4.976695 | -4.300568 | -3.400677 |
| H  | -4.454811 | -3.894828 | -4.278045 |
| H  | -5.950555 | -4.692472 | -3.711548 |
| H  | -4.382217 | -5.119368 | -2.970252 |
| H  | -1.066508 | -1.057759 | -2.967973 |
| H  | -2.209590 | -0.151740 | -1.837130 |
| H  | 5.099309  | 1.455250  | 1.066691  |
| H  | 5.585659  | 1.764618  | -0.606699 |
| H  | 4.392122  | 0.495905  | -0.244196 |
| H  | 4.442879  | 3.862272  | 1.414961  |
| H  | 3.285167  | 4.659567  | 0.331103  |
| H  | 4.906815  | 4.252448  | -0.250718 |
| H  | -0.703362 | 4.804723  | -3.075261 |
| H  | -2.028008 | 3.975280  | -3.922081 |
| H  | -0.487209 | 4.261259  | -4.748544 |
| H  | -0.320796 | 0.591422  | -4.074302 |
| H  | -0.371227 | 1.837908  | -5.326150 |
| H  | -1.842873 | 1.435633  | -4.429520 |
| C  | 4.584879  | -2.568611 | 0.750025  |
| C  | 5.739418  | -2.210416 | 0.025971  |
| C  | 4.751878  | -3.433321 | 1.850780  |
| C  | 6.990261  | -2.717720 | 0.366828  |
| H  | 5.662171  | -1.500991 | -0.802662 |
| C  | 6.001222  | -3.945921 | 2.189605  |
| H  | 3.871667  | -3.703757 | 2.443740  |
| C  | 7.128973  | -3.594971 | 1.445097  |
| H  | 7.869245  | -2.418725 | -0.210439 |
| H  | 6.097697  | -4.622029 | 3.043314  |
| H  | 8.112111  | -3.991203 | 1.710816  |
| C  | 2.756436  | -1.488339 | -0.687097 |
| C  | 3.239968  | -2.068849 | 0.435719  |
| Si | 3.509799  | -1.385405 | -2.397460 |
| C  | 2.163030  | -0.811617 | -3.577146 |
| C  | 4.147711  | -3.054140 | -2.990203 |
| H  | 4.627489  | -0.382993 | -2.495990 |
| H  | 3.330251  | -3.791346 | -3.017646 |
| H  | 4.939697  | -3.469023 | -2.349451 |
| H  | 4.551880  | -2.981087 | -4.012261 |
| H  | 1.407087  | -1.597078 | -3.738934 |
| H  | 2.549492  | -0.525676 | -4.568079 |
| H  | 1.649264  | 0.068850  | -3.159517 |
| H  | 2.546863  | -2.239900 | 1.282796  |
| H  | -0.328672 | 7.719008  | -1.247174 |
| H  | -2.756466 | 7.313281  | -1.641800 |
| C  | -0.763752 | 6.739391  | -1.035169 |
| C  | -2.121347 | 6.511946  | -1.256205 |
| H  | 1.105677  | 5.896564  | -0.350296 |
| C  | 0.041978  | 5.716002  | -0.533729 |
| C  | -2.666990 | 5.255756  | -0.982586 |
| C  | -0.498355 | 4.457588  | -0.246534 |
| C  | -1.862871 | 4.234228  | -0.482525 |
| H  | -2.301484 | 3.253427  | -0.270504 |
| H  | -3.729550 | 5.069758  | -1.158026 |

137

Scheme\_S6\_XXXI / electronic energy: -5719.56101765 a.u. / lowest freq: -331.11 cm<sup>-1</sup>

|   |           |           |           |
|---|-----------|-----------|-----------|
| C | -0.409249 | 3.074093  | 0.536802  |
| H | -1.245848 | 3.513171  | -0.019172 |
| C | 0.899269  | 3.245869  | -0.244998 |
| H | 1.640952  | 3.811074  | 0.342726  |
| C | 0.521446  | 0.924879  | 0.074932  |
| C | -1.573175 | 0.979540  | 1.324264  |
| C | -1.176623 | 0.299979  | 2.479918  |
| C | -2.949383 | 1.101434  | 1.043241  |
| C | -2.115335 | -0.241640 | 3.353797  |
| H | -0.106963 | 0.230764  | 2.696655  |
| C | -3.886052 | 0.575988  | 1.935545  |
| C | -3.474282 | -0.089686 | 3.088617  |
| H | -1.780174 | -0.765080 | 4.252242  |
| H | -4.949277 | 0.674549  | 1.712445  |
| H | -4.221158 | -0.495650 | 3.774287  |

|    |           |           |           |
|----|-----------|-----------|-----------|
| C  | 2.659328  | 1.592365  | -0.996681 |
| C  | 2.697805  | 1.147896  | -2.334494 |
| C  | 3.848031  | 1.878144  | -0.286636 |
| C  | 3.949551  | 0.973811  | -2.938995 |
| C  | 5.070627  | 1.705081  | -0.943036 |
| C  | 5.126940  | 1.255904  | -2.257808 |
| H  | 6.092920  | 1.119289  | -2.750540 |
| S  | -3.520505 | 1.826495  | -0.502740 |
| O  | -3.363271 | 3.282947  | -0.440685 |
| O  | -5.023830 | 1.499654  | -0.514311 |
| O  | -2.808404 | 1.124981  | -1.582270 |
| Cu | 0.748109  | -1.090145 | 0.186639  |
| C  | -0.478796 | 3.597176  | 1.950824  |
| C  | -1.698462 | 4.105505  | 2.417619  |
| C  | 0.589032  | 3.483228  | 2.848090  |
| C  | -1.846867 | 4.485701  | 3.751077  |
| H  | -2.540680 | 4.184626  | 1.723467  |
| C  | 0.444338  | 3.864953  | 4.180812  |
| H  | 1.545418  | 3.080000  | 2.507391  |
| C  | -0.776411 | 4.364337  | 4.637161  |
| H  | -2.805441 | 4.877861  | 4.099495  |
| H  | 1.289197  | 3.767231  | 4.867379  |
| H  | -0.891755 | 4.659892  | 5.682785  |
| N  | -0.570661 | 1.581778  | 0.525995  |
| N  | 1.395836  | 1.839317  | -0.365405 |
| C  | -0.709202 | -2.254225 | -0.825273 |
| H  | -0.631034 | -2.095841 | -1.904849 |
| Al | -5.995288 | 0.060256  | -1.174769 |
| H  | 5.998221  | 1.918236  | -0.404815 |
| C  | 0.234801  | -3.067185 | -0.151798 |
| C  | 3.852369  | 2.361199  | 1.148259  |
| C  | 1.459435  | 0.795179  | -3.128353 |
| H  | 3.994972  | 0.613723  | -3.970375 |
| C  | 1.258267  | -3.898032 | -0.786827 |
| H  | -0.032347 | -3.375378 | 0.865544  |
| C  | 1.429790  | -3.970648 | -2.180981 |
| C  | 2.116081  | -4.668520 | 0.022686  |
| C  | -1.913770 | -1.837766 | -0.200626 |
| C  | -5.855257 | -0.103062 | -3.114965 |
| C  | -7.724956 | 0.110243  | -0.262163 |
| H  | -7.645421 | 0.378274  | 0.805291  |
| H  | -8.231212 | -0.870802 | -0.300564 |
| H  | -8.429036 | 0.832887  | -0.708385 |
| H  | -6.345687 | 0.718694  | -3.663363 |
| H  | -6.324991 | -1.035200 | -3.474810 |
| H  | -4.807189 | -0.127624 | -3.456815 |
| C  | 2.429733  | -4.765496 | -2.738266 |
| H  | 0.760522  | -3.414825 | -2.841531 |
| C  | 3.109904  | -5.465881 | -0.533061 |
| H  | 1.997969  | -4.624203 | 1.109882  |
| C  | 3.276783  | -5.513767 | -1.919664 |
| H  | 2.541222  | -4.807643 | -3.824898 |
| H  | 3.765055  | -6.049191 | 0.118899  |
| H  | 4.060182  | -6.135851 | -2.359385 |
| H  | 2.827339  | 2.243525  | 1.530647  |
| C  | 4.244394  | 3.832361  | 1.249436  |
| C  | 4.748089  | 1.510385  | 2.037111  |
| H  | 0.574154  | 1.132011  | -2.564924 |
| C  | 1.371805  | -0.718960 | -3.263071 |
| C  | 1.428936  | 1.478281  | -4.488728 |
| O  | -4.978565 | -1.251809 | -0.394856 |
| H  | -6.250316 | -1.713418 | 1.994714  |
| C  | -6.080951 | -2.799720 | 1.976515  |
| P  | -4.607448 | -2.714645 | -0.191168 |
| H  | -6.925359 | -3.287057 | 1.466522  |
| H  | -6.025037 | -3.171560 | 3.005027  |
| O  | -5.640343 | -3.564542 | -1.072037 |
| O  | -4.840449 | -3.119346 | 1.345222  |
| O  | -3.159832 | -3.098421 | -0.522724 |
| C  | -5.535481 | -4.989217 | -1.137916 |
| H  | -6.418055 | -5.349800 | -1.675591 |
| H  | -5.519787 | -5.436057 | -0.133402 |
| H  | -4.631116 | -5.289796 | -1.683861 |
| H  | -2.443591 | -0.996054 | -0.652062 |
| H  | -1.956628 | -1.878700 | 0.893601  |
| H  | 4.693828  | 1.852719  | 3.081354  |
| H  | 5.805263  | 1.563056  | 1.734976  |
| H  | 4.444018  | 0.455810  | 2.009377  |
| H  | 4.166648  | 4.190805  | 2.287033  |
| H  | 3.616775  | 4.486342  | 0.626435  |
| H  | 5.286753  | 3.985621  | 0.928617  |
| H  | 1.587352  | 2.563360  | -4.405058 |
| H  | 0.458952  | 1.320161  | -4.983007 |

|    |           |           |           |
|----|-----------|-----------|-----------|
| H  | 2.201847  | 1.082100  | -5.165228 |
| H  | 1.400064  | -1.198953 | -2.272659 |
| H  | 2.219069  | -1.122279 | -3.841490 |
| H  | 0.443532  | -1.029156 | -3.767319 |
| C  | 4.943787  | -1.963187 | 0.418927  |
| C  | 5.704409  | -2.331828 | -0.709851 |
| C  | 5.600285  | -1.957649 | 1.665073  |
| C  | 7.041004  | -2.704505 | -0.599636 |
| H  | 5.219020  | -2.327314 | -1.691974 |
| C  | 6.938479  | -2.326511 | 1.777603  |
| H  | 5.064331  | -1.635655 | 2.560672  |
| C  | 7.667047  | -2.706633 | 0.648349  |
| H  | 7.600685  | -2.990910 | -1.494088 |
| H  | 7.422193  | -2.306473 | 2.757899  |
| H  | 8.717968  | -2.992059 | 0.739820  |
| C  | 2.491306  | -1.533363 | 1.078292  |
| C  | 3.533518  | -1.598128 | 0.216248  |
| Si | 2.348170  | -1.923933 | 2.892978  |
| C  | 0.693958  | -2.742736 | 3.274691  |
| C  | 2.473268  | -0.349711 | 3.931864  |
| H  | 3.380792  | -2.892854 | 3.403806  |
| H  | 2.104407  | 0.534073  | 3.387596  |
| H  | 3.509506  | -0.133082 | 4.230129  |
| H  | 1.882653  | -0.436786 | 4.858017  |
| H  | -0.157825 | -2.219850 | 2.812691  |
| H  | 0.520288  | -2.759440 | 4.362791  |
| H  | 0.658493  | -3.788992 | 2.934440  |
| H  | 3.341557  | -1.402336 | -0.857407 |
| H  | -1.400232 | 4.228381  | -4.221861 |
| C  | -0.500413 | 4.375068  | -3.619290 |
| H  | 0.430601  | 5.709373  | -5.043094 |
| C  | 0.526009  | 5.200593  | -4.080682 |
| C  | 0.754161  | 3.914636  | -1.593756 |
| C  | 1.675501  | 5.369098  | -3.309376 |
| C  | 1.786229  | 4.729519  | -2.074486 |
| H  | 2.486837  | 6.009511  | -3.663706 |
| H  | 2.683540  | 4.874362  | -1.464785 |
| C  | -0.385860 | 3.730242  | -2.388980 |
| H  | -1.199763 | 3.082904  | -2.049487 |

130

Scheme\_S6\_XXXII / electronic energy: -5527.99348065 a.u. / lowest freq: -363.96 cm-1

|    |           |           |           |
|----|-----------|-----------|-----------|
| C  | -0.116953 | -3.169756 | -1.235469 |
| H  | 0.901283  | -3.503428 | -1.469184 |
| C  | -0.730882 | -2.440025 | -2.424252 |
| H  | -1.550900 | -2.998752 | -2.896175 |
| C  | -0.766284 | -0.972058 | -0.601724 |
| C  | 0.606832  | -2.172475 | 1.005972  |
| C  | -0.137906 | -2.072964 | 2.186459  |
| C  | 2.004168  | -2.330134 | 1.096070  |
| C  | 0.480732  | -2.116298 | 3.432167  |
| H  | -1.221735 | -1.962642 | 2.102792  |
| C  | 2.618482  | -2.385895 | 2.350513  |
| C  | 1.863051  | -2.274624 | 3.514928  |
| H  | -0.122007 | -2.033480 | 4.339942  |
| H  | 3.701986  | -2.501036 | 2.407130  |
| H  | 2.359343  | -2.314271 | 4.486642  |
| C  | -1.772729 | -0.155494 | -2.700840 |
| C  | -0.897596 | 0.618837  | -3.497845 |
| C  | -3.174897 | 0.013266  | -2.760966 |
| C  | -1.461877 | 1.561107  | -4.367002 |
| C  | -3.681026 | 0.989906  | -3.626836 |
| C  | -2.837231 | 1.750611  | -4.430171 |
| H  | -3.256226 | 2.502820  | -5.103569 |
| S  | 3.036067  | -2.490964 | -0.363899 |
| O  | 4.427497  | -2.111934 | 0.170351  |
| O  | 2.568428  | -1.522748 | -1.369334 |
| O  | 3.031667  | -3.905228 | -0.750071 |
| Cu | -1.074428 | 0.547754  | 0.680511  |
| C  | -0.888105 | -4.334585 | -0.666741 |
| C  | -0.194646 | -5.413985 | -0.106305 |
| C  | -2.286732 | -4.327121 | -0.618035 |
| C  | -0.888662 | -6.468876 | 0.486628  |
| H  | 0.899526  | -5.418825 | -0.138329 |
| C  | -2.981842 | -5.379308 | -0.025115 |
| H  | -2.838549 | -3.483498 | -1.041665 |
| C  | -2.283243 | -6.453755 | 0.528364  |
| H  | -0.337057 | -7.307893 | 0.917761  |
| H  | -4.074603 | -5.357545 | 0.007328  |
| H  | -2.826756 | -7.280400 | 0.992360  |
| N  | -0.060403 | -2.061113 | -0.236081 |
| N  | -1.214539 | -1.171534 | -1.851118 |
| C  | 0.821303  | 1.213567  | 1.351177  |
| H  | 1.320950  | 0.514821  | 2.032120  |

|    |           |           |           |
|----|-----------|-----------|-----------|
| Al | 5.541078  | -0.681646 | -0.219810 |
| H  | -4.760143 | 1.151209  | -3.680178 |
| C  | -0.195477 | 2.067260  | 1.826394  |
| C  | -4.118530 | -0.876440 | -1.977189 |
| H  | 0.018401  | -2.236124 | -3.202161 |
| C  | 0.610733  | 0.454432  | -3.467238 |
| H  | -0.802113 | 2.165860  | -4.995757 |
| C  | -0.591197 | 2.223120  | 3.226247  |
| H  | -0.495390 | 2.894900  | 1.170237  |
| C  | 0.013904  | 1.505102  | 4.274738  |
| C  | -1.607951 | 3.141241  | 3.553333  |
| C  | 1.338588  | 1.326849  | 0.028711  |
| C  | 5.882746  | -0.591851 | -2.142602 |
| C  | 6.980960  | -0.835700 | 1.095173  |
| H  | 6.604026  | -0.800312 | 2.132110  |
| H  | 7.749208  | -0.048242 | 1.013381  |
| H  | 7.518354  | -1.794715 | 0.996831  |
| H  | 6.243522  | -1.555243 | -2.542786 |
| H  | 6.643971  | 0.159661  | -2.411534 |
| H  | 4.973710  | -0.338354 | -2.713797 |
| C  | -0.392620 | 1.689413  | 5.593221  |
| H  | 0.818261  | 0.797061  | 4.058293  |
| C  | -2.011228 | 3.326455  | 4.872008  |
| H  | -2.081314 | 3.713873  | 2.750353  |
| C  | -1.407546 | 2.598351  | 5.899831  |
| H  | 0.092852  | 1.122502  | 6.391875  |
| H  | -2.801541 | 4.045748  | 5.101147  |
| H  | -1.722120 | 2.742926  | 6.936218  |
| H  | -3.600081 | -1.151208 | -1.042799 |
| C  | -4.415302 | -2.160239 | -2.752704 |
| C  | -5.433493 | -0.206414 | -1.606233 |
| H  | 0.875138  | -0.136440 | -2.575575 |
| C  | 1.350005  | 1.786761  | -3.367531 |
| C  | 1.115107  | -0.299820 | -4.697207 |
| O  | 4.427236  | 0.698014  | 0.299346  |
| H  | 6.342998  | 2.157697  | 2.072512  |
| C  | 6.173874  | 3.003214  | 1.391459  |
| P  | 4.112812  | 2.163889  | 0.005910  |
| H  | 6.777629  | 2.865510  | 0.481734  |
| H  | 6.487579  | 3.928723  | 1.885856  |
| O  | 4.824903  | 2.485920  | -1.398500 |
| O  | 4.783367  | 3.135776  | 1.089098  |
| O  | 2.631025  | 2.556871  | -0.004840 |
| C  | 4.694250  | 3.780860  | -1.985213 |
| H  | 5.101984  | 3.717418  | -2.999530 |
| H  | 5.261639  | 4.531627  | -1.416067 |
| H  | 3.640803  | 4.089442  | -2.040892 |
| H  | 0.723578  | 1.861733  | -0.696454 |
| H  | 1.880084  | 0.470961  | -0.386760 |
| H  | -5.996951 | -0.837533 | -0.902804 |
| H  | -6.083202 | -0.064684 | -2.483577 |
| H  | -5.290045 | 0.775768  | -1.135427 |
| H  | -5.025628 | -2.852532 | -2.151793 |
| H  | -3.508367 | -2.697881 | -3.060169 |
| H  | -4.981982 | -1.936432 | -3.670359 |
| H  | 0.611942  | -1.264758 | -4.850149 |
| H  | 2.194851  | -0.497476 | -4.618699 |
| H  | 0.954482  | 0.292584  | -5.611816 |
| H  | 0.937727  | 2.452898  | -2.596399 |
| H  | 1.322186  | 2.341882  | -4.318027 |
| H  | 2.411392  | 1.617381  | -3.127905 |
| C  | -3.307101 | 3.035162  | -0.447633 |
| C  | -4.241294 | 4.042933  | -0.763176 |
| C  | -2.053440 | 3.103440  | -1.084070 |
| C  | -3.936100 | 5.072020  | -1.650232 |
| H  | -5.228923 | 4.006533  | -0.291633 |
| C  | -1.740203 | 4.134721  | -1.964024 |
| H  | -1.318302 | 2.314769  | -0.898882 |
| C  | -2.678144 | 5.129243  | -2.252445 |
| H  | -4.684696 | 5.837506  | -1.871442 |
| H  | -0.757474 | 4.156694  | -2.444424 |
| H  | -2.432013 | 5.936790  | -2.946323 |
| C  | -2.990008 | 0.950876  | 1.022024  |
| C  | -3.699044 | 1.985901  | 0.502990  |
| Si | -3.886316 | -0.206885 | 2.191537  |
| C  | -3.016950 | -0.282088 | 3.860448  |
| C  | -3.913792 | -1.958024 | 1.482220  |
| C  | -5.664750 | 0.325458  | 2.518504  |
| H  | -2.974569 | -2.203373 | 0.962392  |
| H  | -4.728841 | -2.102174 | 0.754721  |
| H  | -4.052216 | -2.714015 | 2.272694  |
| H  | -5.715638 | 1.306932  | 3.016309  |
| H  | -6.165979 | -0.396828 | 3.182982  |

|   |           |           |          |
|---|-----------|-----------|----------|
| H | -6.268380 | 0.390758  | 1.599751 |
| H | -1.949988 | -0.537181 | 3.778538 |
| H | -3.484260 | -1.040975 | 4.509487 |
| H | -3.077737 | 0.681122  | 4.391761 |
| H | -4.758228 | 2.114209  | 0.800026 |

130

Scheme\_S6\_XXXIII / electronic energy: -5527.98798981 a.u. / lowest freq: -290.69 cm<sup>-1</sup>

|    |           |           |           |
|----|-----------|-----------|-----------|
| C  | 2.156869  | 2.759806  | -1.077579 |
| H  | 1.403131  | 3.315778  | -1.659818 |
| C  | 2.930199  | 1.792019  | -1.964174 |
| H  | 4.007210  | 1.809064  | -1.741799 |
| C  | 1.517274  | 0.525717  | -0.575390 |
| C  | 0.612987  | 2.329306  | 0.845702  |
| C  | 1.127896  | 2.368825  | 2.146196  |
| C  | -0.634555 | 2.921429  | 0.592164  |
| C  | 0.426880  | 2.992872  | 3.172633  |
| H  | 2.099868  | 1.906119  | 2.330494  |
| C  | -1.325516 | 3.568862  | 1.621704  |
| C  | -0.795486 | 3.610062  | 2.906146  |
| H  | 0.843452  | 3.006776  | 4.182223  |
| H  | -2.295603 | 4.026321  | 1.410585  |
| H  | -1.346163 | 4.113395  | 3.703716  |
| C  | 2.707545  | -0.711601 | -2.357913 |
| C  | 1.772551  | -1.278747 | -3.260950 |
| C  | 3.995938  | -1.268137 | -2.191369 |
| C  | 2.121478  | -2.473830 | -3.900590 |
| C  | 4.294794  | -2.458562 | -2.867343 |
| C  | 3.361564  | -3.071382 | -3.693345 |
| H  | 3.609149  | -4.006486 | -4.201881 |
| S  | -1.474632 | 2.881046  | -0.990440 |
| O  | -1.779865 | 4.268117  | -1.356153 |
| O  | -2.760834 | 2.127533  | -0.577476 |
| O  | -0.710307 | 2.086913  | -1.959273 |
| Cu | 0.539943  | -0.952716 | 0.407798  |
| C  | 2.964962  | 3.730474  | -0.258006 |
| C  | 2.519244  | 5.047262  | -0.104860 |
| C  | 4.095420  | 3.307935  | 0.453509  |
| C  | 3.192741  | 5.930301  | 0.739539  |
| H  | 1.623954  | 5.373538  | -0.644015 |
| C  | 4.768258  | 4.187349  | 1.298717  |
| H  | 4.440982  | 2.272302  | 0.360092  |
| C  | 4.317289  | 5.501359  | 1.443813  |
| H  | 2.834295  | 6.956458  | 0.850504  |
| H  | 5.646478  | 3.845512  | 1.851995  |
| H  | 4.843741  | 6.190490  | 2.108644  |
| N  | 1.427909  | 1.807635  | -0.192204 |
| N  | 2.350922  | 0.476267  | -1.634715 |
| C  | -0.943676 | -1.904981 | -0.761797 |
| H  | -0.453095 | -2.365678 | -1.622999 |
| Al | -4.420840 | 2.092150  | -1.413433 |
| H  | 5.283255  | -2.907920 | -2.742887 |
| C  | -0.819686 | -2.502101 | 0.518257  |
| C  | 5.090658  | -0.580991 | -1.397252 |
| H  | 2.821017  | 2.014588  | -3.033333 |
| C  | 0.471366  | -0.580414 | -3.605911 |
| H  | 1.412121  | -2.939511 | -4.588015 |
| C  | -0.203654 | -3.806871 | 0.764202  |
| H  | -1.505996 | -2.158281 | 1.301681  |
| C  | 0.402461  | -4.567929 | -0.253377 |
| C  | -0.229958 | -4.343776 | 2.066027  |
| C  | -1.837761 | -0.834782 | -1.003167 |
| C  | -4.103839 | 1.974197  | -3.342168 |
| C  | -5.530465 | 3.448168  | -0.550119 |
| H  | -5.550544 | 3.307696  | 0.545231  |
| H  | -6.581630 | 3.452898  | -0.883503 |
| H  | -5.143915 | 4.467414  | -0.723300 |
| H  | -3.519246 | 2.830723  | -3.720316 |
| H  | -5.027153 | 1.938452  | -3.944889 |
| H  | -3.528436 | 1.069231  | -3.606597 |
| C  | 0.955440  | -5.815317 | 0.022163  |
| H  | 0.439206  | -4.184825 | -1.276547 |
| C  | 0.325793  | -5.589424 | 2.340343  |
| H  | -0.703100 | -3.766164 | 2.865551  |
| C  | 0.922698  | -6.332586 | 1.318866  |
| H  | 1.417362  | -6.390248 | -0.784440 |
| H  | 0.291047  | -5.986688 | 3.357983  |
| H  | 1.357576  | -7.312060 | 1.531970  |
| H  | 4.614617  | 0.145927  | -0.719638 |
| C  | 6.014793  | 0.183105  | -2.347495 |
| C  | 5.912552  | -1.526716 | -0.534217 |
| H  | 0.082015  | -0.138732 | -2.677039 |
| C  | -0.592180 | -1.495022 | -4.198751 |
| C  | 0.710595  | 0.580970  | -4.569367 |

|    |           |           |           |
|----|-----------|-----------|-----------|
| O  | -4.976890 | 0.459016  | -0.772027 |
| H  | -5.867094 | -0.377077 | 1.650345  |
| C  | -5.682646 | -1.452021 | 1.511124  |
| P  | -4.709929 | -1.043200 | -0.900873 |
| H  | -6.615752 | -1.937079 | 1.187775  |
| H  | -5.365151 | -1.889727 | 2.463505  |
| O  | -6.014647 | -1.641258 | -1.611497 |
| O  | -4.635936 | -1.685531 | 0.570246  |
| O  | -3.448972 | -1.508713 | -1.635256 |
| C  | -6.082965 | -3.036642 | -1.910824 |
| H  | -7.123633 | -3.259082 | -2.168762 |
| H  | -5.790836 | -3.650620 | -1.046424 |
| H  | -5.437849 | -3.285050 | -2.764346 |
| H  | -1.700746 | -0.194587 | -1.873645 |
| H  | -2.234752 | -0.308666 | -0.131440 |
| H  | 6.631189  | -0.959681 | 0.075392  |
| H  | 6.502127  | -2.231076 | -1.139855 |
| H  | 5.287613  | -2.116678 | 0.147776  |
| H  | 6.742096  | 0.790823  | -1.788158 |
| H  | 5.471085  | 0.853331  | -3.028290 |
| H  | 6.586505  | -0.516755 | -2.976960 |
| H  | 1.405491  | 1.329168  | -4.169011 |
| H  | -0.234275 | 1.102015  | -4.782421 |
| H  | 1.120813  | 0.224247  | -5.527416 |
| H  | -0.756821 | -2.416530 | -3.622163 |
| H  | -0.339783 | -1.799870 | -5.226218 |
| H  | -1.555966 | -0.968648 | -4.258635 |
| C  | -0.972804 | -0.330096 | 3.534105  |
| C  | -1.625539 | -0.319671 | 4.782707  |
| C  | -1.664039 | 0.225369  | 2.442843  |
| C  | -2.911670 | 0.196867  | 4.925074  |
| H  | -1.104528 | -0.730826 | 5.653460  |
| C  | -2.952979 | 0.730829  | 2.574114  |
| H  | -1.153506 | 0.283537  | 1.476662  |
| C  | -3.586345 | 0.720020  | 3.819965  |
| H  | -3.392860 | 0.190928  | 5.906840  |
| H  | -3.457262 | 1.152132  | 1.698461  |
| H  | -4.596103 | 1.124348  | 3.929362  |
| C  | 1.112589  | -1.167958 | 2.317010  |
| C  | 0.379159  | -0.889795 | 3.424042  |
| Si | 2.853498  | -1.801338 | 2.539902  |
| C  | 3.218817  | -3.202318 | 1.340071  |
| C  | 3.169106  | -2.455357 | 4.279108  |
| C  | 4.025885  | -0.358210 | 2.227380  |
| H  | 2.472829  | -3.269637 | 4.537780  |
| H  | 3.069340  | -1.677500 | 5.051983  |
| H  | 4.189217  | -2.863147 | 4.365671  |
| H  | 3.841310  | 0.101410  | 1.243197  |
| H  | 5.084599  | -0.660393 | 2.263201  |
| H  | 3.890143  | 0.429718  | 2.986133  |
| H  | 2.591488  | -4.077348 | 1.570303  |
| H  | 4.264898  | -3.539107 | 1.416077  |
| H  | 3.031097  | -2.931785 | 0.287225  |
| H  | 0.803678  | -1.109222 | 4.423494  |

92

Scheme\_S7\_S.XV / electronic energy: -4351.35404269 a.u. / lowest freq: -333.86 cm<sup>-1</sup>

|    |           |           |           |
|----|-----------|-----------|-----------|
| C  | -2.279831 | 1.408442  | -0.018272 |
| H  | -2.456577 | 1.647772  | 1.038256  |
| C  | -2.874594 | 0.028436  | -0.375741 |
| H  | -3.593018 | 0.122494  | -1.207758 |
| C  | -0.539765 | -0.026956 | -0.750562 |
| C  | 0.179471  | 2.177565  | -0.106895 |
| C  | 0.626799  | 2.793065  | -1.280169 |
| C  | 0.771923  | 2.537133  | 1.115836  |
| C  | 1.632015  | 3.756907  | -1.241174 |
| H  | 0.170483  | 2.499191  | -2.229371 |
| C  | 1.777579  | 3.503236  | 1.153478  |
| C  | 2.205596  | 4.115290  | -0.022764 |
| H  | 1.968234  | 4.226390  | -2.168267 |
| H  | 2.227083  | 3.758132  | 2.115019  |
| H  | 2.993795  | 4.870198  | 0.016089  |
| C  | -1.726223 | -2.058446 | -1.349900 |
| C  | -1.341850 | -3.113504 | -0.498875 |
| C  | -2.125512 | -2.285178 | -2.683421 |
| C  | -1.366139 | -4.415179 | -1.022108 |
| C  | -2.148924 | -3.601938 | -3.153852 |
| C  | -1.770865 | -4.660116 | -2.329656 |
| H  | -1.784950 | -5.682919 | -2.714022 |
| S  | 0.304250  | 1.755225  | 2.655652  |
| O  | 1.160122  | 2.302921  | 3.712619  |
| O  | 0.640807  | 0.268869  | 2.398841  |
| O  | -1.142605 | 1.931456  | 2.817812  |
| Cu | 1.264567  | -0.630681 | -1.118961 |

|    |           |           |           |
|----|-----------|-----------|-----------|
| C  | -2.737312 | 2.575074  | -0.855878 |
| C  | -2.975652 | 3.810099  | -0.243021 |
| C  | -2.852037 | 2.476274  | -2.248492 |
| C  | -3.328890 | 4.924576  | -1.004227 |
| H  | -2.874899 | 3.895367  | 0.843474  |
| C  | -3.205974 | 3.587691  | -3.010688 |
| H  | -2.653135 | 1.520321  | -2.742729 |
| C  | -3.445561 | 4.815212  | -2.389432 |
| H  | -3.513656 | 5.882114  | -0.511396 |
| H  | -3.294144 | 3.497068  | -4.096173 |
| H  | -3.722591 | 5.686827  | -2.987348 |
| N  | -0.817272 | 1.167425  | -0.200574 |
| N  | -1.680986 | -0.710963 | -0.877707 |
| C  | 2.899283  | -0.862698 | 0.113929  |
| C  | 2.516654  | -1.998299 | 0.821404  |
| O  | 2.141388  | -2.094404 | 2.048146  |
| C  | 2.611290  | -3.211852 | -0.064464 |
| Al | 1.941487  | -0.747388 | 3.288662  |
| H  | -2.452138 | -3.791032 | -4.187028 |
| C  | 3.264228  | -1.230352 | -1.282575 |
| C  | -2.472216 | -1.144352 | -3.583882 |
| C  | -0.937693 | -2.902558 | 0.925694  |
| H  | -1.062286 | -5.245436 | -0.378276 |
| H  | -1.665634 | -0.394759 | -3.612998 |
| H  | -3.381561 | -0.615826 | -3.256865 |
| H  | -2.648509 | -1.486491 | -4.611014 |
| H  | -0.572006 | -1.888489 | 1.135589  |
| H  | -0.154957 | -3.612529 | 1.225298  |
| H  | -1.788823 | -3.082821 | 1.601732  |
| C  | 3.468843  | -2.739460 | -1.232747 |
| H  | 1.598941  | -3.516832 | -0.389280 |
| H  | 3.027137  | -4.071388 | 0.480948  |
| H  | 4.533803  | -2.916147 | -1.014148 |
| H  | 3.253644  | -3.248795 | -2.181378 |
| C  | 3.016137  | 0.135975  | 0.542697  |
| C  | 1.066754  | -1.529574 | 4.852439  |
| C  | 3.640323  | 0.231939  | 3.407197  |
| H  | 3.714146  | 1.063751  | 2.685991  |
| H  | 4.510998  | -0.421204 | 3.219487  |
| H  | 3.797843  | 0.681653  | 4.402096  |
| H  | 1.729555  | -2.161418 | 5.467847  |
| H  | 0.207824  | -2.163152 | 4.568611  |
| H  | 0.666790  | -0.753665 | 5.528409  |
| C  | -3.549376 | -0.724691 | 0.745314  |
| C  | -4.592213 | -1.607155 | 0.436988  |
| C  | -3.112707 | -0.628186 | 2.072781  |
| C  | -5.190293 | -2.379352 | 1.432128  |
| H  | -4.937314 | -1.688346 | -0.598920 |
| C  | -3.719385 | -1.390564 | 3.069927  |
| H  | -2.287005 | 0.039150  | 2.335503  |
| C  | -4.756300 | -2.269462 | 2.753678  |
| H  | -6.003326 | -3.062860 | 1.175421  |
| H  | -3.371706 | -1.302065 | 4.102312  |
| H  | -5.227648 | -2.867517 | 3.537534  |
| C  | 4.378282  | -0.425666 | -1.875124 |
| O  | 5.359074  | -0.894311 | -2.405805 |
| O  | 4.164189  | 0.890811  | -1.741635 |
| C  | 5.179690  | 1.741920  | -2.266303 |
| H  | 4.842872  | 2.769120  | -2.099695 |
| H  | 6.135123  | 1.578934  | -1.750422 |
| H  | 5.323803  | 1.567208  | -3.340792 |
| C  | 2.117771  | -1.060784 | -2.977713 |
| H  | 1.817245  | -0.073597 | -3.363029 |
| H  | 2.992967  | -1.403344 | -3.537549 |
| H  | 1.318566  | -1.806003 | -3.126022 |

92

Scheme\_S7\_S.XVI / electronic energy: -4351.35275204 a.u. / lowest freq: -327.80 cm<sup>-1</sup>

|   |           |           |           |
|---|-----------|-----------|-----------|
| C | 2.588657  | -0.420911 | -0.159422 |
| H | 2.564125  | -0.955915 | 0.803109  |
| C | 2.571340  | 1.102187  | 0.074518  |
| H | 3.230455  | 1.599560  | -0.660271 |
| C | 0.481856  | 0.433043  | -0.804403 |
| C | 0.819177  | -1.937338 | -1.178969 |
| C | 0.789815  | -2.310005 | -2.526431 |
| C | 0.375774  | -2.850379 | -0.205983 |
| C | 0.334905  | -3.569815 | -2.906693 |
| H | 1.135043  | -1.589468 | -3.271754 |
| C | -0.073633 | -4.115547 | -0.591808 |
| C | -0.092260 | -4.475310 | -1.936505 |
| H | 0.318548  | -3.844775 | -3.963402 |
| H | -0.427465 | -4.813037 | 0.169932  |
| H | -0.447975 | -5.466485 | -2.225079 |
| C | 0.670702  | 2.791717  | -0.257134 |

|    |           |           |           |
|----|-----------|-----------|-----------|
| C  | -0.072335 | 3.253098  | 0.844942  |
| C  | 0.927367  | 3.607675  | -1.379726 |
| C  | -0.548472 | 4.572485  | 0.803587  |
| C  | 0.436456  | 4.916832  | -1.371921 |
| C  | -0.295171 | 5.396867  | -0.286654 |
| H  | -0.675694 | 6.421313  | -0.296412 |
| S  | 0.390448  | -2.444088 | 1.543501  |
| O  | 1.685775  | -2.872991 | 2.077810  |
| O  | -0.728468 | -3.334654 | 2.112235  |
| O  | 0.046638  | -1.021995 | 1.686760  |
| Cu | -1.429646 | 0.511763  | -1.124117 |
| C  | 3.759212  | -0.936933 | -0.952458 |
| C  | 4.606823  | -1.903505 | -0.402639 |
| C  | 4.008753  | -0.470386 | -2.250076 |
| C  | 5.693487  | -2.388924 | -1.131736 |
| H  | 4.407068  | -2.278362 | 0.605733  |
| C  | 5.090017  | -0.956997 | -2.980320 |
| H  | 3.343305  | 0.278299  | -2.692510 |
| C  | 5.937098  | -1.916606 | -2.420385 |
| H  | 6.350443  | -3.142234 | -0.690466 |
| H  | 5.274646  | -0.587656 | -3.992042 |
| H  | 6.786333  | -2.297595 | -2.992738 |
| N  | 1.290846  | -0.639855 | -0.843125 |
| N  | 1.166225  | 1.450635  | -0.271113 |
| C  | -3.041032 | -0.180540 | -0.011441 |
| C  | -3.088845 | -1.530947 | -0.335415 |
| O  | -2.857109 | -2.558901 | 0.401800  |
| C  | -3.515093 | -1.704020 | -1.768984 |
| Al | -2.565143 | -2.978129 | 2.159088  |
| H  | 0.622736  | 5.559289  | -2.236798 |
| C  | -3.509119 | 0.637070  | -1.174438 |
| C  | 1.674437  | 3.077437  | -2.561227 |
| C  | -0.359150 | 2.394544  | 2.034444  |
| H  | -1.129115 | 4.949252  | 1.650252  |
| H  | 1.254941  | 2.122360  | -2.914503 |
| H  | 2.735766  | 2.888521  | -2.334636 |
| H  | 1.646989  | 3.785431  | -3.398607 |
| H  | -0.191285 | 1.327358  | 1.844390  |
| H  | -1.396319 | 2.525537  | 2.375975  |
| H  | 0.279408  | 2.680194  | 2.885948  |
| C  | -4.169757 | -0.371196 | -2.107844 |
| H  | -4.179211 | -2.572441 | -1.884308 |
| H  | -2.630428 | -1.909957 | -2.399952 |
| H  | -4.110320 | -0.098358 | -3.169693 |
| H  | -5.240408 | -0.405201 | -1.850394 |
| H  | -2.855550 | 0.212572  | 0.989952  |
| C  | -2.949730 | -1.480039 | 3.363893  |
| C  | -3.358510 | -4.741972 | 2.459598  |
| H  | -3.064104 | -5.465275 | 1.679505  |
| H  | -4.461802 | -4.729023 | 2.469450  |
| H  | -3.048655 | -5.182453 | 3.422717  |
| H  | -3.949207 | -1.039993 | 3.201507  |
| H  | -2.219385 | -0.659193 | 3.269752  |
| H  | -2.927377 | -1.793524 | 4.422331  |
| C  | -2.404740 | 1.736615  | -2.498079 |
| H  | -1.921292 | 2.652299  | -2.123531 |
| H  | -1.775017 | 1.230865  | -3.249943 |
| H  | -3.346497 | 2.002083  | -2.986605 |
| C  | -4.324710 | 1.840723  | -0.815841 |
| O  | -3.751074 | 2.553266  | 0.163424  |
| O  | -5.372383 | 2.143238  | -1.340042 |
| C  | -4.435800 | 3.737295  | 0.560239  |
| H  | -5.487884 | 3.527212  | 0.791429  |
| H  | -3.928508 | 4.108345  | 1.455484  |
| H  | -4.391598 | 4.497679  | -0.232155 |
| C  | 2.964538  | 1.583663  | 1.449430  |
| C  | 2.659937  | 0.866508  | 2.614223  |
| C  | 3.605313  | 2.823782  | 1.569064  |
| C  | 3.000644  | 1.377653  | 3.865685  |
| H  | 2.130226  | -0.087437 | 2.553972  |
| C  | 3.933919  | 3.341416  | 2.821118  |
| H  | 3.847601  | 3.390607  | 0.664539  |
| C  | 3.634824  | 2.615857  | 3.974331  |
| H  | 2.760439  | 0.804946  | 4.764794  |
| H  | 4.432318  | 4.311006  | 2.895159  |
| H  | 3.897455  | 3.013890  | 4.957627  |

88

Scheme\_S7\_S.XVII / electronic energy: -5848.15114599 a.u. / lowest freq: -335.15 cm<sup>-1</sup>

|   |          |           |           |
|---|----------|-----------|-----------|
| C | 0.541258 | 0.472984  | -0.717932 |
| N | 1.390800 | -0.561723 | -0.646460 |
| C | 1.037807 | -1.873149 | -1.065922 |
| C | 1.109049 | -2.192544 | -2.425784 |
| N | 1.177326 | 1.568303  | -0.280353 |

|    |           |           |           |
|----|-----------|-----------|-----------|
| Cu | -1.341519 | 0.358588  | -1.151321 |
| C  | -3.395462 | 0.190574  | -1.531231 |
| C  | -3.011654 | -0.444896 | -0.234776 |
| C  | -2.849577 | -1.825428 | -0.397099 |
| C  | 2.725694  | -0.207751 | -0.092371 |
| H  | 2.851830  | -0.749785 | 0.857254  |
| C  | 2.572096  | 1.308024  | 0.167731  |
| C  | 0.598031  | -2.847462 | -0.155366 |
| C  | 0.756242  | -3.463337 | -2.875130 |
| H  | 1.448701  | -1.424863 | -3.125893 |
| C  | 0.234087  | -4.114963 | -0.609982 |
| C  | 0.319058  | -4.425365 | -1.965459 |
| H  | 0.819915  | -3.699374 | -3.939596 |
| H  | -0.130314 | -4.846915 | 0.112786  |
| H  | 0.033911  | -5.421413 | -2.311067 |
| C  | 0.569518  | 2.859848  | -0.249058 |
| C  | -0.440721 | 3.140381  | 0.693161  |
| C  | 0.974281  | 3.815693  | -1.206633 |
| C  | -1.032784 | 4.411923  | 0.658593  |
| C  | 0.362595  | 5.073245  | -1.190339 |
| C  | -0.634202 | 5.371762  | -0.264149 |
| H  | -1.108356 | 6.356334  | -0.269269 |
| S  | 0.494658  | -2.504832 | 1.602510  |
| O  | 1.877759  | -2.407426 | 2.090784  |
| O  | -0.320216 | -3.605519 | 2.192359  |
| O  | -0.294088 | -1.224299 | 1.733770  |
| C  | 3.828351  | -0.624491 | -1.030518 |
| C  | 4.604861  | -1.748247 | -0.727870 |
| C  | 4.040436  | 0.039106  | -2.245905 |
| C  | 5.581243  | -2.196931 | -1.617877 |
| H  | 4.429963  | -2.279166 | 0.213051  |
| C  | 5.015594  | -0.406287 | -3.135533 |
| H  | 3.426916  | 0.908370  | -2.502964 |
| C  | 5.789120  | -1.526328 | -2.822584 |
| H  | 6.180554  | -3.075985 | -1.368765 |
| H  | 5.172634  | 0.120899  | -4.079823 |
| O  | -2.608675 | -2.713241 | 0.484566  |
| C  | -3.028507 | -2.177768 | -1.854815 |
| H  | 0.663779  | 5.817231  | -1.932742 |
| C  | 1.992874  | 3.488518  | -2.250576 |
| C  | -0.894313 | 2.157958  | 1.727216  |
| H  | -1.818351 | 4.643441  | 1.383530  |
| C  | -2.246118 | 1.254147  | -2.825255 |
| H  | 1.800498  | 2.508580  | -2.713174 |
| H  | 3.017892  | 3.452058  | -1.848139 |
| H  | 1.994627  | 4.241356  | -3.048517 |
| H  | -0.581507 | 1.125147  | 1.530766  |
| H  | -1.990802 | 2.172363  | 1.819388  |
| H  | -0.504061 | 2.433010  | 2.720567  |
| C  | -4.383851 | 1.308272  | -1.414656 |
| C  | -3.794325 | -0.986044 | -2.417385 |
| O  | -4.011334 | 2.197630  | -0.481378 |
| H  | -3.541255 | -3.142593 | -1.977042 |
| H  | -2.034553 | -2.293268 | -2.327381 |
| H  | -3.629087 | -0.811189 | -3.489099 |
| H  | -4.877011 | -1.142800 | -2.286147 |
| H  | -3.050464 | 0.058066  | 0.735962  |
| C  | -2.725303 | -1.814968 | 4.198256  |
| H  | -3.146337 | -0.806848 | 4.346576  |
| H  | -1.832543 | -1.892583 | 4.840579  |
| H  | -3.466737 | -2.535679 | 4.579090  |
| H  | 4.233936  | 4.283805  | 3.366663  |
| C  | 3.666766  | 3.370235  | 3.171996  |
| H  | 3.236919  | 3.000906  | 5.257430  |
| C  | 3.503480  | 2.919632  | 1.861771  |
| C  | 3.108393  | 2.652815  | 4.229490  |
| C  | 2.783544  | 1.749993  | 1.594270  |
| C  | 2.386491  | 1.485886  | 3.970452  |
| C  | 2.220247  | 1.037532  | 2.661671  |
| H  | 1.945764  | 0.920029  | 4.795101  |
| H  | 1.642151  | 0.128405  | 2.469616  |
| H  | 3.941809  | 3.481644  | 1.030873  |
| H  | 6.553571  | -1.876575 | -3.520445 |
| H  | 3.261615  | 1.877976  | -0.476638 |
| H  | -3.134370 | 1.381141  | -3.451350 |
| H  | -1.489751 | 0.721401  | -3.425555 |
| H  | -1.880763 | 2.249003  | -2.523808 |
| C  | -4.870965 | 3.317423  | -0.298996 |
| H  | -4.498300 | 3.857230  | 0.576799  |
| H  | -5.906867 | 2.998991  | -0.124725 |
| H  | -4.846069 | 3.978053  | -1.177004 |
| O  | -5.395174 | 1.411264  | -2.070793 |
| Zn | -2.208101 | -2.155048 | 2.335201  |

88

Scheme\_S7\_S.XVIII / electronic energy: -5848.14566459 a.u. / lowest freq: -345.29 cm<sup>-1</sup>

|    |           |           |           |
|----|-----------|-----------|-----------|
| C  | -2.871975 | 0.573436  | 0.030162  |
| Zn | -2.347318 | -0.018374 | 3.210379  |
| C  | -2.753188 | 1.659026  | 0.906035  |
| Cu | -1.148189 | 0.712025  | -1.068385 |
| C  | -3.207580 | 1.051552  | -1.341493 |
| H  | 3.098789  | -0.856365 | -2.782298 |
| N  | 1.033500  | -1.048312 | -0.387810 |
| C  | 0.682759  | 0.200514  | -0.733055 |
| C  | 0.132778  | -2.140787 | -0.527348 |
| C  | -0.145537 | -2.624326 | -1.809996 |
| N  | 1.771108  | 0.977825  | -0.667002 |
| C  | 2.492408  | -1.206614 | -0.122139 |
| H  | 2.607675  | -1.595392 | 0.898824  |
| C  | 2.991801  | 0.251413  | -0.215159 |
| H  | 3.761907  | 0.344188  | -0.999586 |
| C  | -0.505263 | -2.726199 | 0.577930  |
| C  | -1.032100 | -3.682483 | -1.995611 |
| H  | 0.346935  | -2.153810 | -2.665156 |
| C  | -1.395331 | -3.783717 | 0.386993  |
| C  | -1.655023 | -4.265761 | -0.894181 |
| H  | -1.239143 | -4.046123 | -3.004333 |
| H  | -1.886583 | -4.216944 | 1.260091  |
| H  | -2.353533 | -5.094275 | -1.029704 |
| C  | 1.733857  | 2.380481  | -0.930441 |
| C  | 1.168383  | 3.255893  | 0.018503  |
| C  | 2.227170  | 2.844938  | -2.167336 |
| C  | 1.119726  | 4.621118  | -0.299264 |
| C  | 2.171136  | 4.217784  | -2.431557 |
| C  | 1.622856  | 5.100699  | -1.504331 |
| H  | 1.577378  | 6.169246  | -1.728737 |
| S  | -0.248161 | -2.129298 | 2.252494  |
| O  | -1.123807 | -2.934126 | 3.116454  |
| O  | -0.693919 | -0.672590 | 2.188645  |
| O  | 1.196827  | -2.240580 | 2.521673  |
| C  | 3.104441  | -2.193525 | -1.083092 |
| C  | 3.372783  | -3.497498 | -0.652026 |
| C  | 3.323341  | -1.866709 | -2.427328 |
| C  | 3.854556  | -4.455858 | -1.543981 |
| H  | 3.189246  | -3.762756 | 0.393909  |
| C  | 3.806677  | -2.821393 | -3.319770 |
| C  | 4.073027  | -4.119468 | -2.879588 |
| H  | 4.059221  | -5.470462 | -1.193585 |
| H  | 3.973510  | -2.552853 | -4.365879 |
| H  | 4.450294  | -4.868959 | -3.579552 |
| O  | -2.527090 | 1.669330  | 2.157448  |
| C  | -2.972319 | 2.940318  | 0.132326  |
| H  | 2.546688  | 4.588632  | -3.389102 |
| C  | 2.749899  | 1.894039  | -3.195004 |
| C  | 0.648930  | 2.784313  | 1.339544  |
| H  | 0.678697  | 5.313379  | 0.423436  |
| H  | 2.031704  | 1.083312  | -3.395317 |
| H  | 3.691072  | 1.412936  | -2.885584 |
| H  | 2.949462  | 2.405927  | -4.144333 |
| H  | 0.231183  | 1.767704  | 1.312019  |
| H  | -0.128970 | 3.458596  | 1.721314  |
| H  | 1.451444  | 2.777805  | 2.094770  |
| C  | -3.695553 | 2.480066  | -1.126779 |
| H  | -1.996058 | 3.405722  | -0.101385 |
| H  | -3.529592 | 3.677261  | 0.728301  |
| H  | -4.779139 | 2.435297  | -0.933406 |
| H  | -3.554685 | 3.138326  | -1.994611 |
| H  | -2.867607 | -0.477342 | 0.334314  |
| C  | -3.462268 | -0.986113 | 4.517603  |
| H  | -3.978583 | -1.821375 | 4.016612  |
| H  | -4.233456 | -0.360574 | 4.995954  |
| H  | -2.846647 | -1.428527 | 5.317038  |
| C  | 3.543932  | 0.854496  | 1.054175  |
| C  | 3.050675  | 0.505329  | 2.318260  |
| C  | 4.526840  | 1.847649  | 0.959352  |
| C  | 3.548812  | 1.128481  | 3.462051  |
| H  | 2.267493  | -0.253353 | 2.415899  |
| C  | 5.014619  | 2.479789  | 2.102416  |
| H  | 4.914123  | 2.126549  | -0.025970 |
| C  | 4.528478  | 2.117271  | 3.358814  |
| H  | 3.162374  | 0.841867  | 4.443447  |
| H  | 5.782601  | 3.251876  | 2.011978  |
| H  | 4.915105  | 2.603816  | 4.257824  |
| C  | -1.953286 | 1.347841  | -2.910126 |
| H  | -2.819445 | 1.641150  | -3.510972 |
| H  | -1.279259 | 2.218890  | -2.849270 |
| H  | -1.456869 | 0.499576  | -3.407777 |

|   |           |           |           |
|---|-----------|-----------|-----------|
| O | -3.819278 | -1.114626 | -2.168338 |
| C | -4.032614 | 0.076190  | -2.119487 |
| O | -5.040712 | 0.674328  | -2.768913 |
| C | -5.867429 | -0.180025 | -3.554858 |
| H | -6.346186 | -0.946104 | -2.931070 |
| H | -6.630771 | 0.458550  | -4.008880 |
| H | -5.283735 | -0.677605 | -4.340790 |

101

Scheme\_S7\_S.XIX / electronic energy: -6080.42219364 a.u. / lowest freq: -346.68 cm-1

|    |           |           |           |
|----|-----------|-----------|-----------|
| C  | -1.354679 | 0.360818  | -0.494402 |
| N  | -0.632873 | 1.480447  | -0.669261 |
| C  | 0.321645  | 1.593834  | -1.714398 |
| C  | -0.128413 | 1.492073  | -3.036544 |
| N  | -2.316498 | 0.615619  | 0.403730  |
| Cu | -0.926903 | -1.381081 | -1.218903 |
| C  | -0.383808 | -3.305184 | -1.867509 |
| C  | 0.512886  | -2.787823 | -0.796298 |
| C  | 1.676767  | -2.236166 | -1.355661 |
| C  | -1.156630 | 2.648586  | 0.101543  |
| H  | -0.339399 | 3.040563  | 0.720940  |
| C  | -2.238510 | 1.989225  | 0.978411  |
| C  | 1.692930  | 1.782294  | -1.471515 |
| C  | 0.759723  | 1.588895  | -4.104631 |
| H  | -1.198018 | 1.347480  | -3.212197 |
| C  | 2.577454  | 1.882626  | -2.547251 |
| C  | 2.116645  | 1.791656  | -3.858912 |
| H  | 0.387731  | 1.512859  | -5.128736 |
| H  | 3.639351  | 2.021803  | -2.336297 |
| H  | 2.822537  | 1.873603  | -4.688290 |
| C  | -3.214499 | -0.383390 | 0.885770  |
| C  | -2.749024 | -1.391159 | 1.752024  |
| C  | -4.556589 | -0.344162 | 0.449425  |
| C  | -3.668492 | -2.358619 | 2.184901  |
| C  | -5.436257 | -1.326293 | 0.914254  |
| C  | -4.996769 | -2.327424 | 1.778397  |
| H  | -5.694773 | -3.091426 | 2.129824  |
| S  | 2.375616  | 1.877735  | 0.191533  |
| O  | 1.822397  | 3.099487  | 0.808194  |
| O  | 3.837792  | 1.872749  | 0.025285  |
| O  | 1.851680  | 0.639524  | 0.885705  |
| C  | -1.603105 | 3.741707  | -0.836682 |
| C  | -0.740447 | 4.816137  | -1.086313 |
| C  | -2.814758 | 3.670226  | -1.535091 |
| C  | -1.085598 | 5.803792  | -2.008845 |
| H  | 0.214388  | 4.864675  | -0.553598 |
| C  | -3.162347 | 4.657613  | -2.455175 |
| H  | -3.493491 | 2.830202  | -1.362660 |
| C  | -2.298086 | 5.727613  | -2.694114 |
| H  | -0.403852 | 6.637914  | -2.192002 |
| H  | -4.113062 | 4.591393  | -2.990041 |
| O  | 2.690846  | -1.751765 | -0.765070 |
| C  | 1.586816  | -2.306012 | -2.862471 |
| H  | -6.475905 | -1.309057 | 0.576223  |
| C  | -5.022398 | 0.691060  | -0.521740 |
| C  | -1.337972 | -1.471187 | 2.242527  |
| H  | -3.319960 | -3.147047 | 2.858046  |
| C  | -2.087503 | -2.463889 | -2.609123 |
| H  | -4.383539 | 0.722881  | -1.418197 |
| H  | -5.015000 | 1.705154  | -0.092152 |
| H  | -6.049378 | 0.491014  | -0.851108 |
| H  | -0.629688 | -0.844842 | 1.684012  |
| H  | -0.978536 | -2.509910 | 2.201394  |
| H  | -1.274522 | -1.169555 | 3.300523  |
| C  | -1.102760 | -4.575434 | -1.539481 |
| C  | 0.490272  | -3.331862 | -3.118389 |
| O  | -1.712699 | -4.509664 | -0.346554 |
| H  | 2.558064  | -2.565648 | -3.307747 |
| H  | 1.326783  | -1.306581 | -3.257637 |
| H  | -0.067278 | -3.169169 | -4.050833 |
| H  | 0.927593  | -4.340442 | -3.187844 |
| H  | 0.391063  | -2.993652 | 0.270917  |
| C  | 2.077402  | -2.079714 | 2.931568  |
| H  | 1.339079  | -2.897150 | 2.874854  |
| H  | 1.657687  | -1.322418 | 3.617016  |
| H  | 2.963553  | -2.502861 | 3.436349  |
| H  | -3.646178 | 1.815033  | 5.423652  |
| C  | -2.799836 | 1.806855  | 4.732430  |
| H  | -1.320789 | 1.579371  | 6.292218  |
| C  | -3.020202 | 1.937640  | 3.361738  |
| C  | -1.498552 | 1.675098  | 5.218155  |
| C  | -1.948758 | 1.930020  | 2.459839  |
| C  | -0.424780 | 1.670169  | 4.326573  |
| C  | -0.645240 | 1.789103  | 2.954850  |

|    |           |           |           |
|----|-----------|-----------|-----------|
| H  | 0.597161  | 1.567310  | 4.700375  |
| H  | 0.207657  | 1.760841  | 2.270276  |
| H  | -4.040696 | 2.046918  | 2.980496  |
| H  | -2.570835 | 6.502168  | -3.415089 |
| H  | -3.213039 | 2.485181  | 0.836804  |
| H  | -2.981210 | -2.402094 | -1.967981 |
| H  | -2.184432 | -3.333904 | -3.265906 |
| H  | -2.003675 | -1.573305 | -3.254294 |
| C  | -2.445048 | -5.668394 | 0.038244  |
| H  | -2.834460 | -5.474101 | 1.041813  |
| H  | -1.800525 | -6.557077 | 0.057451  |
| H  | -3.279234 | -5.852182 | -0.652726 |
| O  | -1.138114 | -5.552998 | -2.252251 |
| Zn | 2.569912  | -1.274456 | 1.182837  |
| O  | 4.628882  | -0.789706 | 1.177534  |
| C  | 5.487489  | -0.668120 | 0.024668  |
| C  | 5.147334  | -0.019158 | 2.272482  |
| C  | 6.615942  | 0.133655  | 1.958508  |
| H  | 4.932896  | -0.563994 | 3.203382  |
| H  | 4.630303  | 0.955547  | 2.306719  |
| C  | 6.593927  | 0.279503  | 0.443567  |
| H  | 4.891997  | -0.302236 | -0.821944 |
| H  | 5.860712  | -1.676364 | -0.221993 |
| H  | 6.326339  | 1.309829  | 0.168733  |
| H  | 7.553432  | 0.039011  | -0.033546 |
| H  | 7.166032  | -0.772965 | 2.257468  |
| H  | 7.072376  | 0.987798  | 2.475855  |

101

Scheme\_S7\_S\_XX / electronic energy: -6080.42012747 a.u. / lowest freq: -348.70 cm<sup>-1</sup>

|    |           |           |           |
|----|-----------|-----------|-----------|
| C  | -1.984666 | 2.177576  | 0.815534  |
| Zn | -3.303815 | -0.085665 | -1.026121 |
| O  | -3.337470 | -2.228480 | -0.693091 |
| C  | -2.649203 | 1.130162  | 1.472741  |
| Cu | -0.045074 | 1.644975  | 1.180646  |
| C  | -1.406501 | 3.125025  | 1.808588  |
| H  | 4.562447  | 0.357258  | 0.627512  |
| N  | 1.711936  | 0.291946  | -0.683270 |
| C  | 1.176366  | 0.294448  | 0.547128  |
| C  | 1.460929  | 1.338463  | -1.613019 |
| C  | 2.234911  | 2.501147  | -1.553032 |
| N  | 1.616581  | -0.790337 | 1.195856  |
| C  | 2.641052  | -0.843847 | -0.933839 |
| H  | 2.226017  | -1.441994 | -1.757690 |
| C  | 2.567262  | -1.616390 | 0.402092  |
| H  | 3.545914  | -1.588252 | 0.912661  |
| C  | 0.427213  | 1.250314  | -2.560765 |
| C  | 1.991603  | 3.563018  | -2.421983 |
| H  | 3.028750  | 2.563291  | -0.804005 |
| C  | 0.185003  | 2.316839  | -3.426480 |
| C  | 0.966379  | 3.469049  | -3.361316 |
| H  | 2.603638  | 4.465676  | -2.360894 |
| H  | -0.628061 | 2.228794  | -4.149605 |
| H  | 0.767255  | 4.297454  | -4.044930 |
| C  | 1.238414  | -1.106013 | 2.534885  |
| C  | 0.018675  | -1.766325 | 2.780303  |
| C  | 2.102700  | -0.721455 | 3.582285  |
| C  | -0.307746 | -2.054218 | 4.114755  |
| C  | 1.731666  | -1.028278 | 4.895094  |
| C  | 0.536947  | -1.696522 | 5.159286  |
| H  | 0.259058  | -1.929290 | 6.190328  |
| S  | -0.622001 | -0.204571 | -2.686261 |
| O  | -1.596633 | 0.075867  | -3.751543 |
| O  | -1.276268 | -0.301164 | -1.318110 |
| O  | 0.281463  | -1.344239 | -2.934798 |
| C  | 4.005937  | -0.349918 | -1.340280 |
| C  | 4.397727  | -0.432744 | -2.680658 |
| C  | 4.864892  | 0.266334  | -0.420772 |
| C  | 5.626716  | 0.080778  | -3.095781 |
| H  | 3.722850  | -0.899670 | -3.404926 |
| C  | 6.093303  | 0.778995  | -0.832331 |
| C  | 6.477351  | 0.686807  | -2.172030 |
| H  | 5.919553  | 0.007633  | -4.145957 |
| H  | 6.754772  | 1.256409  | -0.105135 |
| H  | 7.440838  | 1.088854  | -2.494694 |
| O  | -3.289389 | 0.154561  | 0.974798  |
| C  | -2.513406 | 1.327372  | 2.967757  |
| H  | 2.388190  | -0.729394 | 5.716831  |
| C  | 3.369154  | 0.020118  | 3.297422  |
| C  | -0.933370 | -2.151954 | 1.692463  |
| H  | -1.252218 | -2.564382 | 4.324933  |
| H  | 3.201166  | 0.870167  | 2.618294  |
| H  | 4.126818  | -0.619482 | 2.816066  |
| H  | 3.819151  | 0.409175  | 4.219269  |

|   |           |           |           |
|---|-----------|-----------|-----------|
| H | -0.734679 | -1.656955 | 0.733216  |
| H | -1.966634 | -1.902352 | 1.971537  |
| H | -0.913296 | -3.241006 | 1.519022  |
| C | -2.138860 | 2.797983  | 3.104143  |
| H | -1.718404 | 0.662649  | 3.356659  |
| H | -3.435804 | 1.046175  | 3.496269  |
| H | -3.050597 | 3.416120  | 3.130547  |
| H | -1.566930 | 3.037007  | 4.011142  |
| H | -2.010180 | 2.343153  | -0.266058 |
| C | -4.693513 | 0.361414  | -2.368888 |
| H | -4.471226 | 1.285794  | -2.927445 |
| H | -5.703110 | 0.483743  | -1.939739 |
| H | -4.758538 | -0.446278 | -3.119002 |
| C | 2.128151  | -3.058511 | 0.329060  |
| C | 1.185748  | -3.500556 | -0.607873 |
| C | 2.625907  | -3.967892 | 1.270942  |
| C | 0.765983  | -4.830558 | -0.608653 |
| H | 0.770335  | -2.799938 | -1.340199 |
| C | 2.193656  | -5.293555 | 1.280585  |
| H | 3.362104  | -3.628086 | 2.006685  |
| C | 1.264009  | -5.729477 | 0.335835  |
| H | 0.039252  | -5.166793 | -1.353267 |
| H | 2.590854  | -5.990265 | 2.022884  |
| H | 0.931187  | -6.770433 | 0.333566  |
| C | -2.651726 | -3.062089 | -1.642699 |
| H | -1.584252 | -3.074389 | -1.380994 |
| H | -2.743761 | -2.613771 | -2.649781 |
| C | -3.343602 | -4.402773 | -1.550387 |
| H | -3.236351 | -4.998076 | -2.466769 |
| H | -2.925781 | -4.991354 | -0.717114 |
| C | -4.777085 | -3.995717 | -1.243345 |
| H | -5.280472 | -3.651611 | -2.160899 |
| H | -5.386090 | -4.799906 | -0.810087 |
| C | -4.574260 | -2.838000 | -0.290262 |
| H | -5.370417 | -2.077982 | -0.327538 |
| H | -4.477286 | -3.173298 | 0.757661  |
| C | 0.497545  | 3.208314  | 2.505202  |
| H | 0.224422  | 4.112800  | 3.058308  |
| H | 0.774343  | 2.440055  | 3.245187  |
| H | 1.348058  | 3.447449  | 1.847317  |
| O | -1.847752 | 5.475451  | 2.030298  |
| C | -1.400413 | 4.556845  | 1.381654  |
| O | -0.839303 | 4.710238  | 0.171817  |
| C | -0.812992 | 6.042568  | -0.331417 |
| H | -0.186641 | 6.689437  | 0.297839  |
| H | -0.391920 | 5.988274  | -1.339344 |
| H | -1.824641 | 6.466602  | -0.377346 |

95

Scheme\_S8\_XXXIV / electronic energy: -4417.90758076 a.u. / lowest freq: -197.45 cm<sup>-1</sup>

|    |           |           |           |
|----|-----------|-----------|-----------|
| C  | 2.339283  | -1.053109 | 1.802031  |
| H  | 2.238982  | -2.102933 | 2.114356  |
| C  | 1.634119  | -0.115423 | 2.786538  |
| H  | 2.318082  | 0.624208  | 3.231139  |
| C  | 0.538653  | 0.054591  | 0.708912  |
| C  | 1.687694  | -1.742200 | -0.532006 |
| C  | 2.751498  | -1.523888 | -1.413678 |
| C  | 0.861602  | -2.862512 | -0.733059 |
| C  | 2.967178  | -2.374407 | -2.495050 |
| H  | 3.406375  | -0.667438 | -1.245895 |
| C  | 1.072899  | -3.706199 | -1.824704 |
| C  | 2.119438  | -3.459171 | -2.709858 |
| H  | 3.798659  | -2.180961 | -3.176418 |
| H  | 0.416499  | -4.567939 | -1.959344 |
| H  | 2.278081  | -4.125640 | -3.560182 |
| C  | -0.260585 | 1.548620  | 2.456327  |
| C  | -1.537085 | 1.165731  | 2.911240  |
| C  | 0.169871  | 2.888580  | 2.467098  |
| C  | -2.386251 | 2.170225  | 3.393917  |
| C  | -0.717254 | 3.859210  | 2.948681  |
| C  | -1.982260 | 3.503218  | 3.411618  |
| H  | -2.661063 | 4.272904  | 3.787394  |
| S  | -0.453608 | -3.302923 | 0.401406  |
| O  | -0.819173 | -4.695223 | 0.113535  |
| O  | -1.590104 | -2.354186 | -0.038067 |
| O  | -0.013096 | -2.995276 | 1.765179  |
| Cu | -0.797794 | 0.841481  | -0.494169 |
| C  | 3.785582  | -0.747023 | 1.509496  |
| C  | 4.188755  | 0.562144  | 1.214663  |
| C  | 4.726636  | -1.778170 | 1.434989  |
| C  | 5.504099  | 0.833417  | 0.846407  |
| H  | 3.455267  | 1.373366  | 1.254753  |
| C  | 6.046715  | -1.509207 | 1.069730  |
| H  | 4.415556  | -2.803944 | 1.654924  |

|    |           |           |           |
|----|-----------|-----------|-----------|
| C  | 6.436695  | -0.204259 | 0.770889  |
| H  | 5.803684  | 1.858027  | 0.611659  |
| H  | 6.772471  | -2.324268 | 1.014072  |
| H  | 7.468612  | 0.006946  | 0.480001  |
| N  | 1.504623  | -0.872420 | 0.573010  |
| N  | 0.620071  | 0.541979  | 1.956526  |
| C  | -2.646583 | 0.282685  | -1.327362 |
| C  | -3.551482 | 0.047918  | -0.300882 |
| O  | -4.025604 | -1.070299 | 0.129841  |
| C  | -4.055749 | 1.342772  | 0.258733  |
| Al | -3.409068 | -2.784010 | -0.037846 |
| H  | -0.404659 | 4.907379  | 2.954772  |
| C  | -2.402857 | 1.729120  | -1.509193 |
| C  | 1.525352  | 3.262053  | 1.961371  |
| H  | 1.153806  | -0.660524 | 3.613513  |
| C  | -1.970535 | -0.264106 | 2.867682  |
| H  | -3.380459 | 1.892988  | 3.755341  |
| C  | -0.386045 | 2.560870  | -1.465129 |
| H  | 1.696652  | 2.881927  | 0.941052  |
| H  | 2.327438  | 2.848152  | 2.592528  |
| H  | 1.660687  | 4.350516  | 1.944383  |
| H  | -1.872705 | -0.694730 | 1.858259  |
| H  | -3.014020 | -0.374842 | 3.188949  |
| H  | -1.350863 | -0.901690 | 3.517225  |
| C  | -2.634895 | 2.274310  | -2.893032 |
| C  | -3.156967 | 2.410419  | -0.360212 |
| H  | -2.040534 | 1.755449  | -3.657541 |
| H  | -2.429753 | 3.350400  | -2.969671 |
| H  | -3.694469 | 2.113626  | -3.157806 |
| H  | -4.065596 | 1.340538  | 1.359836  |
| H  | -5.110256 | 1.453130  | -0.048101 |
| H  | -3.708241 | 3.294622  | -0.712683 |
| H  | -2.458189 | 2.781708  | 0.408007  |
| H  | -2.324800 | -0.486733 | -2.035193 |
| C  | -0.430292 | 3.795504  | -0.932001 |
| Si | 0.817458  | 2.001197  | -2.806979 |
| H  | -1.173938 | 4.030620  | -0.151445 |
| C  | 0.431152  | 4.965711  | -1.279079 |
| C  | 0.383919  | 0.251076  | -3.349369 |
| C  | 2.528451  | 1.981931  | -2.020277 |
| C  | 0.815356  | 3.093495  | -4.339221 |
| H  | 1.288591  | 4.710284  | -1.916227 |
| H  | 0.823000  | 5.454859  | -0.372950 |
| H  | -0.148014 | 5.744819  | -1.804987 |
| H  | 2.510589  | 1.408668  | -1.079182 |
| H  | 2.884722  | 2.995096  | -1.776082 |
| H  | 3.283973  | 1.521218  | -2.677501 |
| H  | -0.184900 | 3.152023  | -4.795657 |
| H  | 1.495351  | 2.684075  | -5.103995 |
| H  | 1.140900  | 4.124162  | -4.135351 |
| H  | 0.250969  | -0.433437 | -2.494359 |
| H  | 1.187051  | -0.167834 | -3.977086 |
| H  | -0.538373 | 0.204680  | -3.948778 |
| C  | -3.824265 | -3.705682 | 1.641853  |
| C  | -3.883974 | -3.535529 | -1.784743 |
| H  | -3.578509 | -2.890768 | -2.627028 |
| H  | -4.967907 | -3.704887 | -1.904393 |
| H  | -3.402634 | -4.514568 | -1.953989 |
| H  | -4.876473 | -3.591620 | 1.954711  |
| H  | -3.209727 | -3.315175 | 2.472324  |
| H  | -3.628939 | -4.790588 | 1.600204  |

95

Scheme\_S8\_XXXV / electronic energy: -4417.90212278 a.u. / lowest freq: -212.38 cm<sup>-1</sup>

|   |           |           |           |
|---|-----------|-----------|-----------|
| C | 1.393833  | 2.223804  | 1.343148  |
| H | 2.378275  | 1.977092  | 1.756110  |
| C | 0.305759  | 2.096939  | 2.403444  |
| H | -0.172250 | 3.056733  | 2.650682  |
| C | -0.223280 | 0.609767  | 0.660746  |
| C | 1.652842  | 0.955849  | -0.847368 |
| C | 0.987579  | 1.357303  | -2.011117 |
| C | 2.953572  | 0.426866  | -0.958614 |
| C | 1.593817  | 1.245945  | -3.260183 |
| H | -0.017620 | 1.776648  | -1.915461 |
| C | 3.560018  | 0.327416  | -2.212204 |
| C | 2.887610  | 0.738911  | -3.360894 |
| H | 1.054727  | 1.570889  | -4.153353 |
| H | 4.562306  | -0.099482 | -2.275704 |
| H | 3.376707  | 0.655908  | -4.333533 |
| C | -1.769692 | 0.693687  | 2.566367  |
| C | -1.673007 | -0.573785 | 3.177331  |
| C | -2.895330 | 1.520709  | 2.737611  |
| C | -2.768491 | -1.029143 | 3.919633  |
| C | -3.966461 | 1.021475  | 3.489996  |

|    |           |           |           |
|----|-----------|-----------|-----------|
| C  | -3.908950 | -0.243475 | 4.067988  |
| H  | -4.756179 | -0.616357 | 4.648930  |
| S  | 3.872041  | -0.238315 | 0.434278  |
| O  | 5.065269  | -0.889017 | -0.111217 |
| O  | 2.879543  | -1.267475 | 1.014088  |
| O  | 4.102425  | 0.832944  | 1.408755  |
| Cu | -1.051367 | -0.768642 | -0.484241 |
| C  | 1.490089  | 3.529857  | 0.596953  |
| C  | 2.744699  | 3.965981  | 0.153757  |
| C  | 0.352831  | 4.266435  | 0.243798  |
| C  | 2.862714  | 5.119548  | -0.620970 |
| H  | 3.632709  | 3.383052  | 0.417934  |
| C  | 0.469042  | 5.421243  | -0.528231 |
| H  | -0.636825 | 3.930886  | 0.569020  |
| C  | 1.724586  | 5.850019  | -0.962972 |
| H  | 3.848328  | 5.449608  | -0.958128 |
| H  | -0.425762 | 5.989581  | -0.793707 |
| H  | 1.815049  | 6.755284  | -1.568240 |
| N  | 0.997773  | 1.124398  | 0.398474  |
| N  | -0.660130 | 1.166361  | 1.803381  |
| C  | -0.995308 | -2.894128 | -0.384784 |
| C  | 0.388275  | -3.005579 | -0.314787 |
| O  | 1.076014  | -3.368323 | 0.714462  |
| C  | 1.004716  | -2.683005 | -1.651350 |
| Al | 2.852226  | -3.132291 | 1.105013  |
| H  | -4.856331 | 1.643892  | 3.619531  |
| C  | -1.438238 | -2.485532 | -1.729967 |
| C  | -2.950101 | 2.898464  | 2.161745  |
| H  | 0.692059  | 1.671180  | 3.342689  |
| C  | -0.436025 | -1.401602 | 3.044501  |
| H  | -2.713628 | -2.012331 | 4.394864  |
| C  | -2.337914 | -0.549771 | -2.040960 |
| H  | -2.465457 | 2.959534  | 1.178455  |
| H  | -2.437253 | 3.627366  | 2.810657  |
| H  | -3.984531 | 3.248870  | 2.054450  |
| H  | -0.301806 | -1.786992 | 2.022681  |
| H  | -0.463068 | -2.266522 | 3.719189  |
| H  | 0.472230  | -0.821603 | 3.269544  |
| C  | -2.659024 | -3.178900 | -2.272724 |
| C  | -0.186254 | -2.581740 | -2.599808 |
| H  | -3.532381 | -3.080668 | -1.615754 |
| H  | -2.938725 | -2.828857 | -3.275533 |
| H  | -2.441695 | -4.258310 | -2.341077 |
| H  | 1.716006  | -3.471716 | -1.942074 |
| H  | 1.602035  | -1.756240 | -1.590740 |
| H  | -0.088134 | -1.774993 | -3.338535 |
| H  | -0.275232 | -3.506747 | -3.193192 |
| H  | -1.670333 | -3.183565 | 0.425705  |
| C  | -1.955695 | 0.002141  | -3.207904 |
| Si | -4.048150 | -0.306757 | -1.265909 |
| H  | -0.937392 | -0.179678 | -3.589727 |
| C  | -2.749270 | 0.892418  | -4.105094 |
| C  | -4.095371 | -1.195907 | 0.389409  |
| C  | -5.465040 | -0.935392 | -2.334943 |
| C  | -4.286445 | 1.538305  | -0.966090 |
| H  | -2.262896 | 1.877181  | -4.211249 |
| H  | -2.804469 | 0.482272  | -5.127294 |
| H  | -3.776570 | 1.068265  | -3.760004 |
| H  | -5.492833 | -2.033674 | -2.390117 |
| H  | -5.418545 | -0.557116 | -3.367619 |
| H  | -6.430263 | -0.609444 | -1.914335 |
| H  | -3.351438 | 2.022897  | -0.645200 |
| H  | -5.044598 | 1.726219  | -0.188755 |
| H  | -4.623163 | 2.062013  | -1.873872 |
| H  | -4.139284 | -2.291283 | 0.293421  |
| H  | -4.978236 | -0.891826 | 0.973846  |
| H  | -3.205142 | -0.957235 | 0.994410  |
| C  | 3.088861  | -3.648989 | 2.977272  |
| C  | 3.987283  | -3.922017 | -0.287949 |
| H  | 4.020744  | -3.328514 | -1.216780 |
| H  | 3.658981  | -4.938455 | -0.569068 |
| H  | 5.034957  | -4.019504 | 0.044632  |
| H  | 2.868165  | -4.716645 | 3.149554  |
| H  | 2.439012  | -3.082587 | 3.665415  |
| H  | 4.123034  | -3.492071 | 3.329023  |

106

Scheme\_S9\_XXXVI / electronic energy: -4076.36248646 a.u. / lowest freq: -224.30 cm<sup>-1</sup>

|   |           |           |           |
|---|-----------|-----------|-----------|
| N | -0.713650 | 0.110230  | 1.014039  |
| C | 0.374509  | 0.442252  | 0.301467  |
| N | 0.167897  | 1.643769  | -0.254831 |
| C | -0.767858 | -1.039019 | 1.841505  |
| C | 0.288034  | -1.239976 | 2.741450  |
| H | 1.107664  | -0.515356 | 2.753137  |

|    |           |           |           |
|----|-----------|-----------|-----------|
| C  | 3.761236  | -0.338720 | 0.792017  |
| C  | 1.419046  | -2.532094 | -1.700445 |
| C  | 2.581261  | -1.764362 | -1.719142 |
| C  | 3.641640  | -1.858383 | -0.701938 |
| H  | 5.787463  | -1.539731 | -0.475119 |
| C  | 5.011397  | -1.556262 | -1.252149 |
| H  | 5.042558  | -0.604105 | -1.797468 |
| O  | 0.539762  | -2.428418 | -2.647400 |
| Al | -1.282726 | -2.569067 | -2.682843 |
| Cu | 1.979577  | -0.587071 | -0.113934 |
| C  | -1.146047 | 2.239379  | 0.084536  |
| C  | -1.348946 | 1.884135  | 3.311532  |
| C  | 3.970635  | -0.754305 | 2.113617  |
| H  | -0.277032 | 1.763435  | 3.124720  |
| C  | -1.792675 | 1.121964  | 0.942013  |
| H  | -2.653599 | 0.700282  | 0.399167  |
| H  | -0.974458 | 3.140510  | 0.698415  |
| C  | -1.862622 | -1.928400 | 1.815572  |
| C  | 0.289182  | -2.322347 | 3.614356  |
| C  | -1.846182 | -2.998646 | 2.727393  |
| C  | -0.790351 | -3.205324 | 3.610558  |
| H  | 1.123190  | -2.463801 | 4.306287  |
| H  | -2.686713 | -3.698070 | 2.715837  |
| H  | -0.812597 | -4.055862 | 4.295840  |
| C  | 1.185646  | 2.337467  | -0.981168 |
| C  | 1.411604  | 2.029597  | -2.336948 |
| C  | 1.969632  | 3.286215  | -0.291888 |
| C  | 2.440354  | 2.714090  | -3.000617 |
| C  | 2.966675  | 3.961916  | -1.004266 |
| C  | 3.200472  | 3.679675  | -2.347999 |
| H  | 3.991458  | 4.207255  | -2.886797 |
| C  | -2.265095 | 1.576171  | 2.297311  |
| C  | -3.632503 | 1.731282  | 2.545956  |
| C  | -4.079114 | 2.190997  | 3.785559  |
| H  | -4.350504 | 1.489962  | 1.755970  |
| C  | -1.793691 | 2.337028  | 4.551508  |
| C  | -3.160968 | 2.492255  | 4.790877  |
| H  | -5.150073 | 2.309439  | 3.967316  |
| H  | -1.070450 | 2.569580  | 5.336920  |
| H  | -3.509491 | 2.846621  | 5.763998  |
| C  | 1.214144  | -3.586871 | -0.646810 |
| H  | 3.583288  | 4.699125  | -0.482418 |
| C  | 1.784960  | 3.526335  | 1.172188  |
| C  | 0.581381  | 1.030680  | -3.076732 |
| H  | 2.633761  | 2.483311  | -4.051899 |
| H  | 1.768534  | 2.582004  | 1.739272  |
| H  | 0.841877  | 4.047252  | 1.401707  |
| H  | 2.596955  | 4.143053  | 1.577588  |
| H  | 0.157109  | 0.254789  | -2.424980 |
| H  | 1.162172  | 0.529701  | -3.863141 |
| H  | -0.262382 | 1.526057  | -3.584131 |
| C  | 3.577030  | -3.135231 | 0.108155  |
| H  | 2.732103  | -1.093565 | -2.572871 |
| C  | -1.881028 | -4.448823 | -2.622710 |
| H  | -1.720075 | -4.916025 | -1.634609 |
| H  | -1.370025 | -5.096121 | -3.357371 |
| H  | -2.960901 | -4.552405 | -2.832331 |
| C  | -1.934658 | 2.639254  | -1.136389 |
| C  | -2.511269 | 1.672093  | -1.970709 |
| C  | -2.075204 | 3.990782  | -1.468133 |
| C  | -3.233962 | 2.052208  | -3.099121 |
| H  | -2.373782 | 0.608316  | -1.749172 |
| C  | -2.787993 | 4.373158  | -2.605152 |
| H  | -1.619998 | 4.750080  | -0.824495 |
| C  | -3.374509 | 3.404487  | -3.419057 |
| H  | -3.684194 | 1.287015  | -3.737516 |
| H  | -2.890025 | 5.432705  | -2.852135 |
| H  | -3.941063 | 3.701782  | -4.304844 |
| C  | -3.024568 | -1.778702 | 0.910984  |
| C  | -5.314151 | -1.530229 | -0.703597 |
| C  | -4.310778 | -1.723663 | 1.468568  |
| H  | -6.195034 | -1.425788 | -1.343240 |
| H  | -4.402573 | -1.762357 | 2.558919  |
| C  | -5.454997 | -1.593245 | 0.684151  |
| H  | -6.441097 | -1.537526 | 1.150453  |
| O  | -1.686111 | -1.808124 | -1.067906 |
| C  | -4.052381 | -1.604269 | -1.283564 |
| H  | -3.947130 | -1.559009 | -2.372769 |
| C  | -2.878724 | -1.731839 | -0.505208 |
| C  | -1.828212 | -1.479526 | -4.233841 |
| H  | -2.858131 | -1.674442 | -4.581425 |
| H  | -1.175088 | -1.674165 | -5.103957 |
| H  | -1.762724 | -0.393614 | -4.047633 |

|   |          |           |           |
|---|----------|-----------|-----------|
| C | 5.336308 | 1.198749  | 2.551428  |
| H | 5.948550 | 1.792858  | 3.234517  |
| H | 3.508835 | -1.675347 | 2.486896  |
| C | 4.749789 | 0.009699  | 2.987641  |
| H | 4.896264 | -0.326407 | 4.018265  |
| H | 4.239554 | 1.189419  | -0.672624 |
| C | 5.140610 | 1.619755  | 1.233710  |
| H | 5.592851 | 2.551823  | 0.881237  |
| C | 4.369530 | 0.850538  | 0.362211  |
| C | 2.163732 | -3.477995 | 0.537089  |
| H | 1.332866 | -4.559650 | -1.159931 |
| H | 0.161870 | -3.563817 | -0.318201 |
| H | 4.259585 | -3.086118 | 0.968935  |
| H | 3.977386 | -3.934664 | -0.543193 |
| H | 2.145615 | -4.407482 | 1.125284  |
| H | 1.800913 | -2.689853 | 1.222283  |
| H | 5.273530 | -2.347419 | -1.974267 |

106

Scheme\_S9\_XXXVII / electronic energy: -4076.36015978 a.u. / lowest freq: -228.84 cm<sup>-1</sup>

|    |           |           |           |
|----|-----------|-----------|-----------|
| C  | 3.718231  | -0.401401 | 1.083963  |
| Cu | 1.902260  | -0.825099 | 0.333562  |
| C  | 3.514837  | -2.233044 | 0.050927  |
| H  | 3.154204  | -1.282756 | 2.985953  |
| C  | 2.176167  | -2.837489 | -0.122936 |
| C  | 1.481968  | -2.860937 | -1.329171 |
| C  | 0.119003  | -0.966172 | 2.869790  |
| Al | -1.324750 | -3.126676 | -2.043326 |
| C  | -2.103884 | -1.562935 | 2.063275  |
| C  | -0.927089 | -0.792080 | 1.951260  |
| N  | -0.768336 | 0.219855  | 0.971219  |
| C  | 0.380690  | 0.405870  | 0.296218  |
| N  | 0.247482  | 1.489427  | -0.482524 |
| C  | -1.809980 | 1.213867  | 0.638639  |
| C  | -2.409319 | 1.889979  | 1.842747  |
| C  | -1.634456 | 2.219414  | 2.962005  |
| H  | -0.573733 | 1.951866  | 2.985757  |
| H  | -2.624403 | 0.717283  | 0.090888  |
| C  | -1.068579 | 2.162154  | -0.334233 |
| H  | -0.896524 | 3.148441  | 0.133007  |
| C  | 0.028441  | -1.899849 | 3.895559  |
| H  | 1.001388  | -0.326053 | 2.776723  |
| C  | -2.185287 | -2.465935 | 3.138505  |
| C  | -1.141639 | -2.645678 | 4.040572  |
| H  | 0.856454  | -2.019003 | 4.598758  |
| H  | -3.093818 | -3.066648 | 3.235672  |
| H  | -1.240202 | -3.370786 | 4.851594  |
| C  | 1.357331  | 2.171262  | -1.076424 |
| C  | 1.627864  | 2.037711  | -2.450460 |
| C  | 2.147290  | 2.988045  | -0.238595 |
| C  | 2.702676  | 2.766506  | -2.981212 |
| C  | 3.200083  | 3.705174  | -0.815220 |
| C  | 3.472459  | 3.600809  | -2.177987 |
| H  | 4.300334  | 4.165530  | -2.614042 |
| C  | -3.767131 | 2.228666  | 1.831813  |
| C  | -4.341905 | 2.888811  | 2.917323  |
| H  | -4.376551 | 1.963916  | 0.961677  |
| C  | -2.210361 | 2.872459  | 4.050746  |
| C  | -3.564716 | 3.209903  | 4.030507  |
| H  | -5.403632 | 3.146389  | 2.896306  |
| H  | -1.598276 | 3.117050  | 4.922329  |
| H  | -4.015389 | 3.719172  | 4.885816  |
| O  | 0.359778  | -3.497197 | -1.448040 |
| C  | 2.077185  | -2.243660 | -2.563943 |
| H  | 3.817624  | 4.344107  | -0.177821 |
| C  | 1.893991  | 3.047870  | 1.233107  |
| C  | 0.831298  | 1.134405  | -3.333657 |
| H  | 2.931470  | 2.667479  | -4.046050 |
| H  | 2.070253  | 2.066831  | 1.707195  |
| H  | 0.855549  | 3.324865  | 1.471521  |
| H  | 2.554918  | 3.773437  | 1.723582  |
| H  | 0.303919  | 0.359003  | -2.762939 |
| H  | 1.474741  | 0.643079  | -4.077555 |
| H  | 0.068464  | 1.688837  | -3.903102 |
| C  | 4.200634  | -1.943484 | -1.268961 |
| H  | 1.742621  | -3.396069 | 0.715451  |
| C  | -2.347976 | -4.798088 | -1.865995 |
| H  | -2.423038 | -5.121369 | -0.812341 |
| H  | -1.891963 | -5.642182 | -2.412819 |
| H  | -3.385015 | -4.723135 | -2.237155 |
| C  | -1.764162 | 2.372734  | -1.655120 |
| C  | -2.316653 | 1.292225  | -2.357593 |
| C  | -1.834079 | 3.651894  | -2.215354 |
| C  | -2.942367 | 1.493281  | -3.584984 |

|   |           |           |           |
|---|-----------|-----------|-----------|
| H | -2.232775 | 0.277131  | -1.953628 |
| C | -2.452220 | 3.854026  | -3.450504 |
| H | -1.397307 | 4.497595  | -1.675162 |
| C | -3.012754 | 2.775800  | -4.134558 |
| H | -3.371145 | 0.641763  | -4.120009 |
| H | -2.501013 | 4.859363  | -3.875867 |
| H | -3.504890 | 2.932967  | -5.097500 |
| C | 4.373159  | -3.002901 | 1.022980  |
| C | -3.240807 | -1.484537 | 1.119900  |
| C | -5.452282 | -1.401039 | -0.611210 |
| C | -4.533882 | -1.244296 | 1.604139  |
| H | -6.304547 | -1.363417 | -1.295557 |
| H | -4.662448 | -1.072322 | 2.677847  |
| C | -5.640125 | -1.193461 | 0.757213  |
| H | -6.634711 | -0.988559 | 1.159558  |
| O | -1.842718 | -1.960476 | -0.743693 |
| C | -4.181637 | -1.662225 | -1.114536 |
| H | -4.036890 | -1.829895 | -2.187339 |
| C | -3.048855 | -1.714612 | -0.272045 |
| C | -1.319115 | -2.250182 | -3.815921 |
| H | -0.723674 | -2.806236 | -4.562528 |
| H | -0.937914 | -1.213978 | -3.832143 |
| H | -2.341607 | -2.200465 | -4.233891 |
| C | 5.294505  | 1.342390  | 2.644232  |
| C | 3.741872  | -0.505611 | 2.484797  |
| H | 5.908205  | 2.016388  | 3.247152  |
| C | 4.510424  | 0.363273  | 3.259605  |
| H | 4.503483  | 0.270447  | 4.349395  |
| H | 4.518358  | 0.703900  | -0.608160 |
| C | 5.293336  | 1.446968  | 1.253040  |
| H | 5.900556  | 2.212038  | 0.759934  |
| C | 4.513285  | 0.582184  | 0.480327  |
| C | 3.258034  | -1.328523 | -2.287059 |
| H | 1.282960  | -1.728617 | -3.125997 |
| H | 2.381172  | -3.084297 | -3.214753 |
| H | 4.566691  | -2.915769 | -1.648545 |
| H | 5.099601  | -1.329329 | -1.118280 |
| H | 2.891047  | -0.356404 | -1.902647 |
| H | 3.789166  | -1.094237 | -3.222047 |
| H | 3.872225  | -3.162937 | 1.986450  |
| H | 5.342116  | -2.520201 | 1.209353  |
| H | 4.568635  | -4.000379 | 0.595820  |

89

Scheme\_S9\_XXXVIII / electronic energy: -4162.96234452 a.u. / lowest freq: -231.19 cm-1

|    |           |           |           |
|----|-----------|-----------|-----------|
| H  | -6.234774 | -0.551255 | 2.714021  |
| H  | -4.172487 | -0.837323 | 4.092884  |
| C  | -5.286568 | -0.121843 | 2.381022  |
| C  | -4.132793 | -0.277379 | 3.154157  |
| H  | -6.113766 | 0.709624  | 0.565388  |
| C  | -5.218461 | 0.589196  | 1.182771  |
| C  | -2.929873 | 0.289639  | 2.734933  |
| H  | -2.041162 | 0.176666  | 3.367286  |
| C  | -4.008243 | 1.146578  | 0.759199  |
| C  | -2.846490 | 1.004098  | 1.528010  |
| H  | -3.028902 | 3.177764  | 3.036296  |
| H  | -3.981630 | 1.679986  | -0.197193 |
| H  | -1.583181 | 2.388619  | 3.716656  |
| C  | -1.939549 | 3.075009  | 2.937928  |
| H  | -3.139792 | 3.534382  | 0.426940  |
| Cu | -1.048126 | 0.739711  | 0.696255  |
| C  | -1.516913 | 2.643631  | 1.554212  |
| H  | -1.487228 | 4.058824  | 3.146076  |
| C  | -2.041287 | 3.550656  | 0.457991  |
| H  | -1.716758 | 2.216890  | -1.202168 |
| C  | -0.056651 | 2.421540  | 1.461165  |
| H  | 0.477867  | 2.106403  | 2.365448  |
| H  | -1.771486 | 4.581548  | 0.754245  |
| C  | -1.433165 | 3.243447  | -0.898183 |
| H  | -1.852781 | 3.902074  | -1.673048 |
| C  | 0.717840  | 2.806991  | 0.372389  |
| C  | 0.082281  | 3.371936  | -0.865066 |
| O  | 2.010780  | 2.758560  | 0.435295  |
| H  | 0.551056  | 2.901207  | -1.743910 |
| H  | 0.382333  | 4.434899  | -0.917972 |
| C  | -0.465877 | -0.834633 | -0.300629 |
| N  | 0.671431  | -1.494354 | -0.030005 |
| C  | 1.536739  | -1.100803 | 1.020993  |
| N  | -0.985786 | -1.345395 | -1.420515 |
| C  | -0.170829 | -2.420742 | -2.001304 |
| C  | 1.020437  | -2.531140 | -1.037348 |
| H  | -2.994369 | -1.894372 | 0.536930  |
| C  | 0.171692  | -4.506421 | 0.289657  |
| C  | 1.156435  | -1.369763 | 2.340225  |

|    |           |           |           |
|----|-----------|-----------|-----------|
| O  | 2.052855  | 0.366230  | -1.665116 |
| Al | 3.507634  | 3.037161  | -0.556814 |
| H  | -0.812879 | -4.027875 | 0.319910  |
| H  | 1.953029  | -2.237378 | -1.541849 |
| C  | 2.735025  | -0.408234 | 0.779686  |
| C  | 1.958850  | -0.972814 | 3.405917  |
| H  | 0.216239  | -1.901006 | 2.510672  |
| C  | 3.546176  | -0.028747 | 1.851951  |
| C  | 3.161417  | -0.310292 | 3.159770  |
| H  | 1.648137  | -1.189425 | 4.430257  |
| H  | 4.471474  | 0.515865  | 1.654562  |
| H  | 3.801452  | -0.001788 | 3.988934  |
| C  | -2.202927 | -0.893460 | -2.015153 |
| C  | -2.148668 | 0.027789  | -3.078186 |
| C  | -3.422562 | -1.392289 | -1.517711 |
| C  | -3.361717 | 0.444590  | -3.643895 |
| C  | -4.607220 | -0.954188 | -2.119694 |
| C  | -4.577466 | -0.045539 | -3.175462 |
| H  | -5.512090 | 0.289537  | -3.632273 |
| C  | 1.225904  | -3.872247 | -0.380929 |
| C  | 2.486234  | -4.477264 | -0.391424 |
| C  | 2.687813  | -5.703743 | 0.244204  |
| H  | 3.316249  | -3.976726 | -0.899241 |
| C  | 0.371065  | -5.729299 | 0.925219  |
| C  | 1.631136  | -6.332488 | 0.901106  |
| H  | 3.676945  | -6.167814 | 0.227237  |
| H  | -0.458606 | -6.215291 | 1.444501  |
| H  | 1.788196  | -7.291982 | 1.399910  |
| H  | -5.563106 | -1.330261 | -1.744643 |
| C  | -3.444935 | -2.342167 | -0.364794 |
| C  | -0.847507 | 0.556459  | -3.589686 |
| H  | -3.341274 | 1.167429  | -4.464354 |
| H  | -2.873125 | -3.258691 | -0.577300 |
| H  | -4.469611 | -2.641496 | -0.111516 |
| H  | -0.075091 | 0.607504  | -2.810598 |
| H  | -0.969696 | 1.556187  | -4.028058 |
| H  | -0.438048 | -0.083820 | -4.388029 |
| C  | 4.810924  | 3.946687  | 0.590473  |
| H  | 4.862465  | 3.508288  | 1.602145  |
| H  | 4.588458  | 5.018517  | 0.731882  |
| H  | 5.834897  | 3.900613  | 0.181026  |
| C  | 3.194981  | 3.698575  | -2.378447 |
| H  | 4.151834  | 3.863619  | -2.904903 |
| H  | 2.657331  | 4.661357  | -2.420510 |
| H  | 2.623157  | 2.988694  | -3.000054 |
| H  | 0.141128  | -2.156915 | -3.022688 |
| H  | -0.754344 | -3.353657 | -2.062662 |
| S  | 3.252574  | 0.024739  | -0.885394 |
| O  | 4.083373  | -1.075182 | -1.382002 |
| O  | 4.126517  | 1.271681  | -0.657368 |

89

Scheme\_59\_XXXIX / electronic energy: -4162.96147012 a.u. / lowest freq: -220.73 cm<sup>-1</sup>

|    |           |           |           |
|----|-----------|-----------|-----------|
| H  | -5.901907 | -0.326017 | -2.840319 |
| H  | -3.874256 | 0.152042  | -4.211043 |
| C  | -4.917003 | -0.652572 | -2.497278 |
| C  | -3.781751 | -0.389262 | -3.265062 |
| H  | -5.665009 | -1.544000 | -0.672531 |
| C  | -4.783595 | -1.338117 | -1.287546 |
| C  | -2.522376 | -0.813930 | -2.831666 |
| H  | -1.648533 | -0.582235 | -3.450056 |
| C  | -3.526087 | -1.764322 | -0.859401 |
| C  | -2.376033 | -1.502778 | -1.620258 |
| H  | -0.904127 | -2.642829 | -3.656966 |
| H  | -2.617186 | -4.084216 | -2.284973 |
| H  | -3.446105 | -2.307475 | 0.089457  |
| H  | 0.518992  | -0.846205 | -2.575814 |
| C  | -0.179895 | -2.861509 | -2.859475 |
| Cu | -0.784495 | -1.152440 | -0.440072 |
| C  | 0.942411  | -1.840866 | -2.819215 |
| C  | -1.871559 | -4.142197 | -1.480451 |
| C  | -0.878362 | -3.009021 | -1.523263 |
| H  | 0.238446  | -3.855722 | -3.104270 |
| H  | -2.400283 | -4.198612 | -0.520119 |
| H  | -1.320820 | -5.090163 | -1.597571 |
| C  | 1.982079  | -2.217869 | -1.777838 |
| C  | 0.057486  | -3.029459 | -0.379636 |
| C  | 1.393169  | -2.641787 | -0.461222 |
| H  | -0.282743 | -3.467455 | 0.566716  |
| O  | 2.177368  | -2.739293 | 0.565477  |
| N  | 0.168497  | 1.586261  | 0.189339  |
| C  | -0.638819 | 0.556106  | 0.480448  |
| N  | -1.282055 | 0.845207  | 1.617856  |
| C  | -0.878781 | 2.128432  | 2.205958  |

|    |           |           |           |
|----|-----------|-----------|-----------|
| C  | 0.171154  | 2.659468  | 1.220349  |
| C  | 1.085470  | 1.587328  | -0.890285 |
| C  | 0.633824  | 1.976097  | -2.157614 |
| H  | -0.418720 | 2.248357  | -2.271427 |
| Al | 3.891538  | -2.256682 | 0.967547  |
| C  | -1.351491 | 4.319460  | 0.063222  |
| H  | -2.172282 | 3.599961  | 0.149265  |
| H  | 1.167942  | 2.678026  | 1.689792  |
| C  | 2.432796  | 1.231688  | -0.722364 |
| C  | 1.504048  | 2.013213  | -3.241863 |
| C  | 3.307558  | 1.286417  | -1.812784 |
| C  | 2.846136  | 1.671771  | -3.066994 |
| H  | 1.135971  | 2.315601  | -4.224546 |
| H  | 4.354068  | 1.006408  | -1.672693 |
| H  | 3.538641  | 1.704736  | -3.910677 |
| C  | -2.248453 | -0.027490 | 2.202792  |
| C  | -1.800791 | -1.147503 | 2.931457  |
| C  | -3.615628 | 0.238990  | 2.001493  |
| C  | -2.769102 | -2.009490 | 3.462522  |
| C  | -4.546631 | -0.642881 | 2.564625  |
| C  | -4.128243 | -1.756932 | 3.287542  |
| H  | -4.867984 | -2.438461 | 3.714955  |
| C  | -0.092684 | 4.003059  | 0.590648  |
| C  | 0.952388  | 4.921792  | 0.448902  |
| C  | 0.744051  | 6.139536  | -0.199933 |
| H  | 1.941747  | 4.670181  | 0.844314  |
| C  | -1.561742 | 5.534674  | -0.584452 |
| C  | -0.513625 | 6.448628  | -0.716173 |
| H  | 1.569055  | 6.848512  | -0.303546 |
| H  | -2.547926 | 5.770641  | -0.991931 |
| H  | -0.678632 | 7.401075  | -1.225788 |
| H  | -5.613286 | -0.454573 | 2.413241  |
| C  | -4.060475 | 1.405159  | 1.179127  |
| C  | -0.342337 | -1.407165 | 3.129864  |
| H  | -2.442965 | -2.885319 | 4.030254  |
| H  | -3.536987 | 1.444212  | 0.211090  |
| H  | -3.866202 | 2.366831  | 1.680349  |
| H  | -5.138038 | 1.362601  | 0.976287  |
| H  | 0.198015  | -1.513911 | 2.176690  |
| H  | -0.177436 | -2.319666 | 3.716743  |
| H  | 0.155639  | -0.575430 | 3.650010  |
| C  | 5.161314  | -3.166096 | -0.224150 |
| H  | 5.182518  | -2.730444 | -1.238078 |
| H  | 4.928931  | -4.237806 | -0.353566 |
| H  | 6.199626  | -3.124050 | 0.147915  |
| O  | 2.076481  | 0.327983  | 1.777727  |
| C  | 4.057180  | -2.387733 | 2.913959  |
| H  | 4.977558  | -1.911645 | 3.294012  |
| H  | 4.081121  | -3.430221 | 3.275638  |
| H  | 3.216485  | -1.894979 | 3.431748  |
| H  | 2.587872  | -3.073255 | -2.132075 |
| H  | 2.707676  | -1.405973 | -1.611343 |
| H  | 1.412503  | -1.731413 | -3.807570 |
| S  | 3.140340  | 0.746939  | 0.858391  |
| O  | 3.994373  | 1.861488  | 1.271475  |
| O  | 4.003084  | -0.465651 | 0.441974  |
| H  | -0.462674 | 1.972316  | 3.212029  |
| H  | -1.742924 | 2.803675  | 2.308628  |

156

Scheme\_S10\_XL / electronic energy: -5439.94152073 a.u. / lowest freq: -268.63 cm<sup>-1</sup>

|    |           |           |           |
|----|-----------|-----------|-----------|
| C  | -1.348166 | -2.528229 | -2.206018 |
| H  | -1.709987 | -3.489250 | -1.814702 |
| C  | 0.149602  | -2.332711 | -1.870705 |
| H  | 0.707984  | -2.098142 | -2.791470 |
| C  | -1.102513 | -0.657670 | -0.764997 |
| C  | -3.371164 | -1.146782 | -1.477563 |
| C  | -3.810973 | -0.204408 | -2.411861 |
| C  | -4.314845 | -1.791505 | -0.660069 |
| C  | -5.168571 | 0.078003  | -2.549633 |
| H  | -3.070009 | 0.299085  | -3.037701 |
| C  | -5.673461 | -1.507070 | -0.801506 |
| C  | -6.101133 | -0.579578 | -1.749882 |
| H  | -5.495554 | 0.816366  | -3.285045 |
| H  | -6.387888 | -2.015596 | -0.151431 |
| H  | -7.167072 | -0.366756 | -1.855636 |
| S  | -3.826204 | -2.949208 | 0.620337  |
| O  | -5.058428 | -3.445659 | 1.244070  |
| O  | -3.054525 | -2.050920 | 1.615865  |
| O  | -2.922921 | -3.933716 | 0.024788  |
| Cu | -1.637013 | 0.942770  | 0.186100  |
| C  | -1.717958 | -2.410787 | -3.661105 |
| C  | -2.644322 | -3.301755 | -4.212651 |
| C  | -1.210815 | -1.377054 | -4.459912 |

|    |           |           |           |
|----|-----------|-----------|-----------|
| C  | -3.053316 | -3.169420 | -5.539889 |
| H  | -3.051545 | -4.102517 | -3.587715 |
| C  | -1.617788 | -1.243321 | -5.785402 |
| H  | -0.501682 | -0.657687 | -4.037084 |
| C  | -2.540606 | -2.140115 | -6.328438 |
| H  | -3.776149 | -3.873816 | -5.958378 |
| H  | -1.215761 | -0.433130 | -6.398563 |
| H  | -2.859160 | -2.035125 | -7.368352 |
| N  | -1.980850 | -1.444667 | -1.397796 |
| N  | 0.132408  | -1.135871 | -0.996151 |
| C  | -2.856639 | 1.419645  | 1.820674  |
| C  | -2.142214 | 0.899371  | 2.900437  |
| O  | -2.534019 | -0.139877 | 3.563743  |
| C  | -0.887568 | 1.545372  | 3.395751  |
| Al | -3.798607 | -1.428108 | 3.223220  |
| C  | -2.484636 | 2.647078  | 1.092144  |
| C  | -3.593735 | 3.445664  | 0.499748  |
| H  | -1.772939 | 3.274089  | 1.638910  |
| C  | -4.727511 | 2.837741  | -0.061023 |
| C  | -3.500016 | 4.844970  | 0.465626  |
| H  | -3.819575 | 0.949452  | 1.600316  |
| C  | -0.188217 | 3.400220  | -0.514867 |
| H  | 0.443901  | 3.232855  | 0.369274  |
| C  | -3.587368 | -2.804550 | 4.594810  |
| C  | -5.557745 | -0.608884 | 2.897012  |
| H  | -5.706633 | -0.242425 | 1.865773  |
| H  | -5.733478 | 0.262195  | 3.553687  |
| H  | -6.385390 | -1.313076 | 3.089229  |
| H  | -3.860930 | -2.454068 | 5.604833  |
| H  | -2.552104 | -3.179504 | 4.665342  |
| H  | -4.222844 | -3.684101 | 4.393437  |
| C  | -5.741330 | 3.607784  | -0.627038 |
| H  | -4.818609 | 1.747477  | -0.065449 |
| C  | -4.517548 | 5.615841  | -0.092408 |
| H  | -2.612087 | 5.329503  | 0.883167  |
| C  | -5.642735 | 5.000114  | -0.642440 |
| H  | -6.616720 | 3.115295  | -1.058857 |
| H  | -4.429700 | 6.705026  | -0.100391 |
| H  | -6.439621 | 5.603269  | -1.083916 |
| H  | -1.128264 | 2.386898  | 4.065740  |
| H  | -0.269545 | 1.948838  | 2.581589  |
| H  | -0.291757 | 0.828380  | 3.973857  |
| C  | -1.359603 | 2.732487  | -0.614882 |
| H  | -2.022061 | 2.922318  | -1.472500 |
| C  | 0.368494  | 4.340905  | -1.483420 |
| C  | 1.709891  | 4.752167  | -1.354426 |
| C  | -0.383470 | 4.873139  | -2.550550 |
| C  | 2.278876  | 5.650644  | -2.253882 |
| H  | 2.307951  | 4.348090  | -0.530590 |
| C  | 0.186459  | 5.769243  | -3.448043 |
| H  | -1.433279 | 4.588877  | -2.666287 |
| C  | 1.520701  | 6.162854  | -3.307671 |
| H  | 3.321966  | 5.954945  | -2.132088 |
| H  | -0.417723 | 6.173063  | -4.264553 |
| H  | 1.963100  | 6.869988  | -4.013278 |
| H  | 3.124931  | -5.940907 | -1.784268 |
| H  | 2.520770  | -6.535795 | 0.558393  |
| C  | 2.376470  | -5.355087 | -1.245200 |
| C  | 2.038868  | -5.687281 | 0.066199  |
| C  | 1.769536  | -4.263380 | -1.867034 |
| C  | 1.081357  | -4.933395 | 0.748557  |
| H  | 0.807640  | -5.195130 | 1.773751  |
| C  | 0.806675  | -3.507616 | -1.191491 |
| C  | 0.463084  | -3.853158 | 0.122173  |
| H  | -0.302663 | -3.278643 | 0.652814  |
| H  | 2.046292  | -3.990360 | -2.890189 |
| H  | 8.458034  | -0.777443 | -2.962373 |
| H  | 7.111461  | 1.277897  | -3.273329 |
| H  | 5.711871  | 2.790593  | -3.908475 |
| H  | 6.260656  | 3.193352  | -1.377809 |
| C  | 7.488370  | -0.680472 | -2.466988 |
| C  | 6.730233  | 0.472675  | -2.639549 |
| C  | 4.714267  | 2.437789  | -3.605648 |
| C  | 5.199896  | 2.956764  | -1.197076 |
| C  | 7.007974  | -1.716330 | -1.670449 |
| H  | 7.608617  | -2.621464 | -1.552578 |
| H  | 4.633618  | 3.895760  | -1.290782 |
| C  | 5.486441  | 0.616559  | -2.011593 |
| C  | 4.698447  | 1.903343  | -2.180365 |
| H  | 5.114876  | 2.613280  | -0.155458 |
| H  | 5.453515  | -4.284060 | -1.698944 |
| C  | 5.769391  | -1.617775 | -1.024268 |
| C  | 5.016513  | -0.430821 | -1.189002 |

|   |           |           |           |
|---|-----------|-----------|-----------|
| H | 3.646720  | 1.687984  | -1.922825 |
| H | 6.784780  | -4.288309 | -0.525609 |
| C | 5.701804  | -4.127042 | -0.638734 |
| C | 5.272583  | -2.753147 | -0.143219 |
| C | 3.710540  | -0.287691 | -0.482457 |
| H | 5.206496  | -4.918778 | -0.058443 |
| H | 4.167623  | -2.726817 | -0.159282 |
| H | 4.387197  | 4.533112  | 1.642472  |
| H | 1.871672  | 5.082699  | 1.733113  |
| H | 6.801822  | -2.579765 | 1.401345  |
| C | 5.704223  | -2.559195 | 1.308887  |
| C | 3.656217  | 0.266504  | 0.801357  |
| H | 2.643161  | 2.788864  | 1.320048  |
| C | 4.223917  | 3.746598  | 2.395225  |
| H | 4.581004  | 0.596453  | 1.284147  |
| H | 4.975608  | 2.960874  | 2.229587  |
| C | 1.790280  | 4.330006  | 2.531833  |
| H | 5.357945  | -1.601741 | 1.724391  |
| C | 2.799907  | 3.203421  | 2.332307  |
| H | 5.303410  | -3.361796 | 1.946673  |
| H | 4.432143  | 4.192429  | 3.380698  |
| C | 2.449018  | 0.336300  | 1.509923  |
| H | 0.752486  | 3.963628  | 2.537444  |
| H | 1.951794  | 4.858729  | 3.483701  |
| C | 2.602684  | 2.080610  | 3.335804  |
| C | 2.434536  | 0.732135  | 2.947593  |
| C | 2.576729  | 2.400447  | 4.699106  |
| H | 2.705584  | 3.441913  | 5.007930  |
| C | 2.248028  | -0.276588 | 3.925314  |
| C | 2.034049  | -1.739289 | 3.567833  |
| H | 3.964369  | -2.390720 | 4.368242  |
| C | 2.388098  | 1.417861  | 5.664981  |
| C | 2.902936  | -2.677051 | 4.397892  |
| C | 2.225601  | 0.092112  | 5.276158  |
| H | 2.827087  | -3.707578 | 4.019445  |
| H | 2.367279  | 1.685608  | 6.724562  |
| H | 2.596737  | -2.703258 | 5.454711  |
| H | 2.074387  | -0.676778 | 6.039038  |
| H | 4.033468  | 3.296137  | -3.703778 |
| H | 4.396126  | 1.679016  | -4.335693 |
| H | 2.572386  | -1.188203 | -2.077507 |
| C | 2.529943  | -0.742502 | -1.080774 |
| C | 1.311091  | -0.637015 | -0.405318 |
| C | 1.277479  | -0.104808 | 0.889452  |
| H | 0.335536  | -0.110002 | 1.445447  |
| H | 2.323169  | -1.884739 | 2.513164  |
| H | -0.090743 | -1.527496 | 3.036347  |
| C | 0.558811  | -2.113770 | 3.703686  |
| H | 0.391976  | -3.177677 | 3.477019  |
| H | 0.200727  | -1.938853 | 4.731190  |

156

Scheme\_S10\_XLI / electronic energy: -5439.94245882 a.u. / lowest freq: -243.82 cm<sup>-1</sup>

|    |           |           |           |
|----|-----------|-----------|-----------|
| C  | 1.555632  | -2.153720 | 2.092411  |
| O  | 2.836158  | -1.933773 | 2.176467  |
| C  | 1.053020  | 3.248559  | -0.262252 |
| H  | 1.098340  | 3.440004  | 0.827185  |
| C  | -0.389629 | 2.892307  | -0.657151 |
| H  | -0.549699 | 3.126627  | -1.725475 |
| C  | 0.878461  | 0.918457  | -0.488629 |
| C  | 3.136883  | 1.804776  | -0.321799 |
| C  | 3.974660  | 1.915292  | -1.434787 |
| C  | 3.700246  | 1.565998  | 0.943504  |
| C  | 5.355092  | 1.802300  | -1.300824 |
| H  | 3.518129  | 2.076485  | -2.414220 |
| C  | 5.088932  | 1.466047  | 1.073440  |
| C  | 5.912405  | 1.578355  | -0.042941 |
| H  | 5.994868  | 1.877121  | -2.183336 |
| H  | 5.523099  | 1.295320  | 2.060111  |
| H  | 6.994678  | 1.485367  | 0.073150  |
| S  | 2.729701  | 1.535058  | 2.457597  |
| O  | 3.539104  | 0.595179  | 3.367787  |
| O  | 1.399365  | 0.973506  | 2.179240  |
| O  | 2.769201  | 2.895018  | 2.996961  |
| Cu | 1.449618  | -0.947433 | -0.356504 |
| C  | 1.671347  | 4.407809  | -0.988680 |
| C  | 2.259036  | 5.448450  | -0.262079 |
| C  | 1.700759  | 4.454182  | -2.389190 |
| C  | 2.857758  | 6.522997  | -0.920447 |
| H  | 2.251110  | 5.407585  | 0.831293  |
| C  | 2.300141  | 5.525423  | -3.047251 |
| H  | 1.262158  | 3.636517  | -2.970014 |
| C  | 2.878415  | 6.563853  | -2.313643 |
| H  | 3.312575  | 7.329554  | -0.340543 |

|    |           |           |           |
|----|-----------|-----------|-----------|
| H  | 2.319080  | 5.550410  | -4.139533 |
| H  | 3.348300  | 7.403933  | -2.830682 |
| N  | 1.734938  | 1.952396  | -0.509893 |
| N  | -0.366073 | 1.417618  | -0.499741 |
| C  | 0.995765  | -2.592325 | 0.897027  |
| C  | 0.715388  | -1.970534 | 3.307869  |
| Al | 3.947548  | -1.224438 | 3.444483  |
| C  | 1.817452  | -2.978692 | -0.262667 |
| C  | 1.128539  | -3.765202 | -1.315879 |
| H  | 2.797245  | -3.364700 | 0.030432  |
| C  | -0.078353 | -3.305901 | -1.868428 |
| C  | 1.660720  | -4.975468 | -1.779112 |
| H  | -0.085186 | -2.760210 | 0.867504  |
| C  | 4.153925  | -1.606189 | -1.328660 |
| H  | 4.486928  | -1.642504 | -0.280316 |
| C  | 3.539082  | -1.801225 | 5.273626  |
| C  | 5.765504  | -1.494601 | 2.761404  |
| H  | 5.868903  | -1.289248 | 1.682341  |
| H  | 6.094372  | -2.538988 | 2.906507  |
| H  | 6.517761  | -0.869382 | 3.272845  |
| H  | 3.460920  | -2.898766 | 5.364108  |
| H  | 2.603442  | -1.384164 | 5.681112  |
| H  | 4.339567  | -1.500442 | 5.972186  |
| C  | -0.746492 | -4.047581 | -2.838213 |
| H  | -0.490286 | -2.347144 | -1.524961 |
| C  | 0.990889  | -5.720261 | -2.750328 |
| H  | 2.607420  | -5.336686 | -1.367375 |
| C  | -0.215140 | -5.261611 | -3.280541 |
| H  | -1.690258 | -3.681044 | -3.250693 |
| H  | 1.415738  | -6.665916 | -3.096118 |
| H  | -0.739010 | -5.844902 | -4.041563 |
| H  | 0.959994  | -2.747352 | 4.050465  |
| H  | -0.357331 | -2.044510 | 3.086878  |
| H  | 0.918843  | -0.997787 | 3.778448  |
| C  | 2.828420  | -1.657728 | -1.577481 |
| H  | 2.453303  | -1.740183 | -2.609668 |
| C  | 5.237128  | -1.479172 | -2.301402 |
| C  | 6.571549  | -1.523876 | -1.852398 |
| C  | 5.014668  | -1.274189 | -3.677647 |
| C  | 7.637226  | -1.376664 | -2.736687 |
| H  | 6.764408  | -1.673415 | -0.785571 |
| C  | 6.079244  | -1.127068 | -4.560448 |
| H  | 3.990540  | -1.218304 | -4.056882 |
| C  | 7.397436  | -1.175691 | -4.096785 |
| H  | 8.663009  | -1.417217 | -2.361229 |
| H  | 5.880939  | -0.966621 | -5.623430 |
| H  | 8.230971  | -1.055310 | -4.792958 |
| H  | -3.768634 | 6.065948  | -0.122918 |
| H  | -2.059419 | 4.858557  | -1.468672 |
| C  | -3.173696 | 5.273592  | 0.337930  |
| C  | -2.215829 | 4.597115  | -0.417431 |
| H  | -4.135166 | 5.450980  | 2.264636  |
| C  | -3.378230 | 4.929379  | 1.673447  |
| C  | -1.443391 | 3.583919  | 0.158973  |
| C  | -2.615343 | 3.913304  | 2.253435  |
| C  | -1.647378 | 3.246971  | 1.504160  |
| H  | -2.771611 | 3.644351  | 3.301283  |
| H  | -1.039996 | 2.458685  | 1.962898  |
| H  | -8.159209 | 0.774748  | -4.112453 |
| H  | -6.561915 | -1.053840 | -4.591211 |
| H  | -3.616258 | -0.737349 | -5.201758 |
| H  | -5.274934 | -2.728250 | -4.893105 |
| C  | -7.270795 | 0.650053  | -3.487786 |
| C  | -6.373304 | -0.379598 | -3.751966 |
| C  | -3.162340 | -1.067745 | -4.254057 |
| C  | -4.844111 | -2.897763 | -3.894767 |
| C  | -7.036405 | 1.524111  | -2.430385 |
| H  | -7.749767 | 2.328067  | -2.235532 |
| H  | -4.085292 | -3.685363 | -4.012775 |
| C  | -5.231732 | -0.559694 | -2.960857 |
| C  | -4.220720 | -1.638356 | -3.311914 |
| H  | -5.641345 | -3.301149 | -3.253043 |
| H  | -5.930529 | 4.175556  | -1.571215 |
| C  | -5.906596 | 1.386256  | -1.614468 |
| C  | -5.004553 | 0.330436  | -1.885666 |
| H  | -3.705436 | -1.932379 | -2.380221 |
| H  | -7.382439 | 3.689927  | -0.671078 |
| C  | -6.282313 | 3.706086  | -0.640141 |
| C  | -5.690847 | 2.319673  | -0.433851 |
| C  | -3.813701 | 0.127825  | -1.011719 |
| H  | -6.004939 | 4.369508  | 0.191376  |
| H  | -4.600113 | 2.444536  | -0.306434 |
| H  | -3.827927 | -4.827831 | -1.094581 |

|   |           |           |           |
|---|-----------|-----------|-----------|
| H | -1.481368 | -5.569769 | -0.469558 |
| H | -7.316210 | 1.549055  | 0.798935  |
| C | -6.226384 | 1.700439  | 0.856224  |
| C | -3.863049 | -0.824859 | 0.014434  |
| H | -2.153676 | -3.257333 | -0.135762 |
| C | -3.962944 | -4.388639 | -0.093696 |
| H | -4.794498 | -1.373376 | 0.182176  |
| H | -4.637335 | -3.526588 | -0.196144 |
| C | -1.698206 | -5.225444 | 0.552539  |
| H | -5.771255 | 0.722278  | 1.069810  |
| C | -2.618351 | -4.011327 | 0.524891  |
| H | -6.027670 | 2.353599  | 1.719995  |
| H | -4.483566 | -5.137641 | 0.524072  |
| C | -2.771499 | -1.050604 | 0.860182  |
| H | -0.736288 | -5.012714 | 1.043762  |
| H | -2.155344 | -6.077107 | 1.079176  |
| C | -2.796458 | -3.364364 | 1.887420  |
| C | -2.890089 | -1.959531 | 2.037266  |
| C | -2.884932 | -4.168899 | 3.029887  |
| H | -2.808840 | -5.254613 | 2.930779  |
| C | -3.086506 | -1.384712 | 3.314891  |
| C | -3.184974 | 0.117351  | 3.529910  |
| H | -5.335903 | 0.107267  | 3.931478  |
| C | -3.062950 | -3.610232 | 4.292203  |
| C | -4.403244 | 0.502114  | 4.361223  |
| C | -3.163906 | -2.230500 | 4.429175  |
| H | -4.504112 | 1.596218  | 4.419099  |
| H | -3.123131 | -4.254965 | 5.172855  |
| H | -4.335002 | 0.133922  | 5.396327  |
| H | -3.301260 | -1.796362 | 5.423561  |
| H | -2.394808 | -1.816689 | -4.501063 |
| H | -2.649218 | -0.197977 | -3.817045 |
| H | -2.589750 | 1.627372  | -1.980594 |
| C | -2.640918 | 0.867934  | -1.195186 |
| C | -1.538682 | 0.639965  | -0.367669 |
| C | -1.602100 | -0.309829 | 0.655535  |
| H | -0.745038 | -0.417071 | 1.325768  |
| H | -3.301487 | 0.602876  | 2.545804  |
| H | -1.025770 | 0.491929  | 3.506774  |
| C | -1.900328 | 0.656073  | 4.153563  |
| H | -1.970137 | 1.737400  | 4.346102  |
| H | -1.689066 | 0.168578  | 5.119112  |

111

Scheme\_S10\_XLII / electronic energy: -4550.91934608 a.u. / lowest freq: -231.04 cm-1

|    |           |           |           |
|----|-----------|-----------|-----------|
| C  | -0.285269 | -0.771213 | -3.170293 |
| O  | 0.535521  | 0.227007  | -3.300355 |
| C  | 2.403329  | -1.301783 | 1.883929  |
| H  | 3.160233  | -1.707168 | 1.188088  |
| C  | 1.393966  | -2.384411 | 2.259553  |
| H  | 1.044189  | -2.293736 | 3.302347  |
| C  | 0.376168  | -0.941684 | 0.726069  |
| C  | 2.007807  | 0.861034  | 0.605714  |
| C  | 1.673559  | 2.026717  | 1.302414  |
| C  | 2.818973  | 0.948512  | -0.535217 |
| C  | 2.158926  | 3.263504  | 0.888380  |
| H  | 1.021329  | 1.940692  | 2.175868  |
| C  | 3.313209  | 2.191862  | -0.941338 |
| C  | 2.985949  | 3.343899  | -0.232143 |
| H  | 1.893853  | 4.165034  | 1.444768  |
| H  | 3.949856  | 2.253736  | -1.826214 |
| H  | 3.376973  | 4.308976  | -0.561539 |
| C  | -0.936078 | -2.884723 | 1.402246  |
| C  | -1.203885 | -3.885715 | 0.442182  |
| C  | -1.837873 | -2.577889 | 2.441786  |
| C  | -2.386694 | -4.620544 | 0.594787  |
| C  | -3.003312 | -3.346274 | 2.549881  |
| C  | -3.267111 | -4.367599 | 1.644581  |
| H  | -4.179718 | -4.961150 | 1.741721  |
| S  | 3.329096  | -0.497817 | -1.472238 |
| O  | 3.390674  | 0.048514  | -2.911661 |
| O  | 2.306743  | -1.544808 | -1.352979 |
| O  | 4.680773  | -0.833076 | -1.021263 |
| Cu | -0.794506 | -0.120119 | -0.604899 |
| C  | 3.102598  | -0.592439 | 3.012786  |
| C  | 4.469360  | -0.310526 | 2.912948  |
| C  | 2.395583  | -0.131527 | 4.131544  |
| C  | 5.121806  | 0.407931  | 3.915303  |
| H  | 5.021739  | -0.651314 | 2.032041  |
| C  | 3.045565  | 0.585627  | 5.133463  |
| H  | 1.321375  | -0.326739 | 4.216832  |
| C  | 4.411414  | 0.856229  | 5.027978  |
| H  | 6.189692  | 0.620239  | 3.824060  |
| H  | 2.482668  | 0.938543  | 6.000978  |

|    |           |           |           |
|----|-----------|-----------|-----------|
| H  | 4.920173  | 1.419517  | 5.814002  |
| N  | 1.532637  | -0.379764 | 1.102760  |
| N  | 0.282262  | -2.137533 | 1.325573  |
| C  | -1.510675 | -0.639486 | -2.517977 |
| C  | 0.111429  | -2.077434 | -3.768481 |
| Al | 2.110266  | 0.622470  | -4.136116 |
| H  | -3.721183 | -3.126660 | 3.344901  |
| C  | -2.138125 | 0.634033  | -2.065700 |
| C  | -1.627962 | -1.387169 | 3.357983  |
| H  | 1.796691  | -3.398242 | 2.144887  |
| C  | -0.276515 | -4.114329 | -0.739924 |
| H  | -2.632660 | -5.404700 | -0.123340 |
| H  | -0.575847 | -1.075810 | 3.284553  |
| H  | -0.023231 | -3.109139 | -1.130582 |
| C  | -3.528948 | 0.429430  | -1.531833 |
| C  | -1.972618 | 1.798438  | -3.017669 |
| C  | -3.803996 | -0.590830 | -0.602550 |
| C  | -4.593240 | 1.255402  | -1.922939 |
| H  | -2.119557 | -1.545654 | -2.452733 |
| C  | -2.156530 | 2.425193  | 0.304369  |
| H  | -3.037882 | 1.878870  | 0.670519  |
| C  | 2.444374  | -0.404958 | -5.772448 |
| C  | 2.134244  | 2.584145  | -4.196709 |
| H  | 1.760976  | 3.046524  | -3.265837 |
| H  | 1.491148  | 2.970928  | -5.007367 |
| H  | 3.135601  | 3.011656  | -4.378013 |
| H  | 1.615568  | -0.366787 | -6.500248 |
| H  | 2.651799  | -1.471591 | -5.583064 |
| H  | 3.329228  | -0.012525 | -6.303999 |
| C  | -5.082573 | -0.773435 | -0.082815 |
| H  | -2.995791 | -1.251231 | -0.262580 |
| C  | -5.877209 | 1.068832  | -1.409935 |
| H  | -4.427492 | 2.057834  | -2.643517 |
| C  | -6.129470 | 0.057328  | -0.485412 |
| H  | -5.262195 | -1.569971 | 0.643762  |
| H  | -6.686881 | 1.725357  | -1.738309 |
| H  | -7.134230 | -0.084784 | -0.080534 |
| H  | -2.484998 | 1.557952  | -3.963887 |
| H  | -0.921857 | 1.979871  | -3.259317 |
| H  | -2.400653 | 2.731224  | -2.629410 |
| H  | 0.249729  | -1.954852 | -4.853770 |
| H  | -0.638985 | -2.858692 | -3.608410 |
| H  | 1.077902  | -2.407826 | -3.357342 |
| C  | 1.038957  | -4.782817 | -0.352440 |
| H  | 0.868175  | -5.776198 | 0.091333  |
| H  | 1.671529  | -4.921254 | -1.241659 |
| H  | 1.625735  | -4.191811 | 0.359776  |
| C  | -0.932704 | -4.901626 | -1.863244 |
| H  | -0.264752 | -4.953278 | -2.734456 |
| H  | -1.140463 | -5.941731 | -1.568248 |
| H  | -1.883288 | -4.457594 | -2.195189 |
| C  | -1.902641 | -1.697215 | 4.821606  |
| H  | -1.302063 | -2.545497 | 5.182178  |
| H  | -1.661981 | -0.829181 | 5.452777  |
| H  | -2.960129 | -1.939436 | 5.005336  |
| C  | -2.457404 | -0.206421 | 2.860689  |
| H  | -2.252610 | 0.701699  | 3.449278  |
| H  | -2.224856 | 0.021311  | 1.808402  |
| H  | -3.538310 | -0.410390 | 2.926450  |
| C  | -1.282100 | 1.787272  | -0.498686 |
| H  | -0.428633 | 2.337859  | -0.929042 |
| C  | -2.058757 | 3.801830  | 0.785671  |
| C  | -2.914845 | 4.234213  | 1.817676  |
| C  | -1.141144 | 4.734160  | 0.259308  |
| C  | -2.849430 | 5.533941  | 2.313371  |
| H  | -3.640846 | 3.527007  | 2.230899  |
| C  | -1.078650 | 6.032671  | 0.753791  |
| H  | -0.479205 | 4.436790  | -0.559618 |
| C  | -1.928682 | 6.440641  | 1.786069  |
| H  | -3.524158 | 5.843135  | 3.115877  |
| H  | -0.363093 | 6.739624  | 0.325392  |
| H  | -1.877557 | 7.462189  | 2.170359  |

111

Scheme\_S10\_XLIII / electronic energy: -4550.91984075 a.u. / lowest freq: -237.83 cm<sup>-1</sup>

|   |           |           |          |
|---|-----------|-----------|----------|
| C | -0.101207 | -1.956437 | 2.457219 |
| H | 0.485506  | -1.836732 | 3.378907 |
| C | 0.544392  | -2.978641 | 1.515581 |
| H | -0.055450 | -3.893931 | 1.406314 |
| C | 0.376061  | -0.948347 | 0.367892 |
| C | -0.166411 | 0.576190  | 2.184017 |
| C | -1.457982 | 1.064146  | 2.402654 |
| C | 0.938565  | 1.378328  | 2.528424 |
| C | -1.650730 | 2.333323  | 2.946093 |

|    |           |           |           |
|----|-----------|-----------|-----------|
| H  | -2.310939 | 0.437269  | 2.132536  |
| C  | 0.740080  | 2.649100  | 3.068668  |
| C  | -0.553215 | 3.125204  | 3.277910  |
| H  | -2.666179 | 2.704168  | 3.105061  |
| H  | 1.610260  | 3.252309  | 3.334568  |
| H  | -0.699870 | 4.119148  | 3.705986  |
| C  | 1.222947  | -2.848273 | -0.929266 |
| C  | 2.622683  | -3.026102 | -0.959634 |
| C  | 0.399565  | -3.237874 | -2.009079 |
| C  | 3.183114  | -3.644330 | -2.084567 |
| C  | 1.014184  | -3.835368 | -3.115894 |
| C  | 2.389733  | -4.048295 | -3.151523 |
| H  | 2.844888  | -4.525028 | -4.023314 |
| S  | 2.629494  | 0.783345  | 2.378325  |
| O  | 3.484220  | 1.763804  | 3.056994  |
| O  | 2.902821  | 0.797352  | 0.860064  |
| O  | 2.650551  | -0.595899 | 2.875334  |
| Cu | 0.177276  | 0.487573  | -0.923739 |
| C  | -1.549220 | -2.214131 | 2.794746  |
| C  | -1.978969 | -2.261408 | 4.123051  |
| C  | -2.493001 | -2.363345 | 1.768386  |
| C  | -3.328436 | -2.457811 | 4.424234  |
| H  | -1.248627 | -2.136118 | 4.927886  |
| C  | -3.838217 | -2.562626 | 2.065690  |
| H  | -2.168757 | -2.301851 | 0.723807  |
| C  | -4.259515 | -2.608468 | 3.397701  |
| H  | -3.652773 | -2.489473 | 5.467291  |
| H  | -4.563785 | -2.678090 | 1.255942  |
| H  | -5.315773 | -2.760109 | 3.633030  |
| N  | 0.028947  | -0.720055 | 1.644585  |
| N  | 0.633993  | -2.256613 | 0.234651  |
| C  | 1.130341  | 2.039534  | -1.891656 |
| C  | 2.193971  | 1.214690  | -2.257988 |
| O  | 3.383914  | 1.422977  | -1.765472 |
| C  | 2.112500  | 0.091085  | -3.245532 |
| Al | 3.882980  | 2.061034  | -0.118465 |
| H  | 0.403986  | -4.147336 | -3.966229 |
| C  | -0.302619 | 2.055993  | -2.307361 |
| C  | -1.105845 | -3.052580 | -1.972253 |
| H  | 1.547882  | -3.272089 | 1.858448  |
| C  | 3.527694  | -2.566641 | 0.164088  |
| H  | 4.265231  | -3.798130 | -2.123095 |
| H  | -1.311649 | -2.158462 | -1.356731 |
| H  | 2.934286  | -1.956192 | 0.860085  |
| C  | -0.973249 | 3.278717  | -1.745126 |
| C  | -0.605357 | 1.767444  | -3.759678 |
| C  | -0.814627 | 3.608176  | -0.388368 |
| C  | -1.754823 | 4.127844  | -2.539315 |
| H  | 1.414476  | 2.825753  | -1.187929 |
| C  | -2.747984 | 1.036002  | -0.888275 |
| H  | -2.614347 | 1.845615  | -0.157175 |
| C  | 5.813833  | 1.773314  | 0.054864  |
| C  | 3.173256  | 3.844179  | 0.326503  |
| H  | 2.123008  | 3.834920  | 0.669708  |
| H  | 3.208936  | 4.553111  | -0.519874 |
| H  | 3.753965  | 4.313019  | 1.140478  |
| H  | 6.213126  | 0.986851  | -0.606834 |
| H  | 6.095909  | 1.493190  | 1.084939  |
| H  | 6.386365  | 2.689662  | -0.172483 |
| C  | -1.404059 | 4.746863  | 0.152320  |
| H  | -0.229387 | 2.943602  | 0.259193  |
| C  | -2.346946 | 5.270493  | -1.998561 |
| H  | -1.902798 | 3.911362  | -3.598695 |
| C  | -2.174414 | 5.587922  | -0.653283 |
| H  | -1.261856 | 4.979141  | 1.210938  |
| H  | -2.945098 | 5.920135  | -2.642469 |
| H  | -2.636181 | 6.484172  | -0.232381 |
| H  | -0.103772 | 2.512788  | -4.397463 |
| H  | -1.681384 | 1.808763  | -3.974183 |
| H  | -0.253443 | 0.781403  | -4.078883 |
| H  | 2.291646  | 0.456988  | -4.269094 |
| H  | 1.135472  | -0.412127 | -3.241448 |
| H  | 2.889560  | -0.652414 | -3.024920 |
| C  | 4.098773  | -3.752715 | 0.936252  |
| H  | 4.774495  | -4.352630 | 0.305947  |
| H  | 4.679151  | -3.408744 | 1.805500  |
| H  | 3.317413  | -4.432434 | 1.307753  |
| C  | 4.649324  | -1.667381 | -0.339392 |
| H  | 4.262861  | -0.818973 | -0.922935 |
| H  | 5.211234  | -1.253163 | 0.511210  |
| H  | 5.369882  | -2.211980 | -0.970101 |
| C  | -1.709062 | -2.809732 | -3.347958 |
| H  | -1.627422 | -3.691520 | -4.006684 |

|   |           |           |           |
|---|-----------|-----------|-----------|
| H | -2.782458 | -2.588195 | -3.267014 |
| H | -1.230148 | -1.969075 | -3.874085 |
| C | -1.781672 | -4.241626 | -1.293007 |
| H | -2.867680 | -4.082603 | -1.203475 |
| H | -1.628319 | -5.165698 | -1.872330 |
| H | -1.388814 | -4.421692 | -0.281976 |
| C | -1.682290 | 0.635257  | -1.611970 |
| H | -1.815639 | -0.124758 | -2.397547 |
| C | -4.097539 | 0.474860  | -0.909831 |
| C | -5.029746 | 0.890883  | 0.060704  |
| C | -4.511798 | -0.493062 | -1.845904 |
| C | -6.314094 | 0.353086  | 0.104251  |
| H | -4.729399 | 1.648843  | 0.791299  |
| C | -5.794161 | -1.028631 | -1.803344 |
| H | -3.816418 | -0.817044 | -2.624563 |
| C | -6.702925 | -0.612527 | -0.825136 |
| H | -7.017648 | 0.691906  | 0.869061  |
| H | -6.093296 | -1.775724 | -2.543404 |
| H | -7.709921 | -1.035262 | -0.793381 |

113

Scheme\_S11\_S.XXI / electronic energy: -4776.97951262 a.u. / lowest freq: -249.48 cm<sup>-1</sup>

|    |           |           |           |
|----|-----------|-----------|-----------|
| C  | -1.903906 | -1.059563 | 1.758714  |
| H  | -1.857602 | -2.132862 | 2.007796  |
| C  | -2.688338 | -0.834444 | 0.437649  |
| C  | -0.422750 | -0.248290 | 0.095080  |
| C  | 0.601178  | -0.719666 | 2.226325  |
| C  | 0.858119  | 0.274549  | 3.173504  |
| C  | 1.503417  | -1.790076 | 2.086202  |
| C  | 2.007789  | 0.221176  | 3.959861  |
| H  | 0.149550  | 1.099295  | 3.276372  |
| C  | 2.656545  | -1.834908 | 2.870248  |
| C  | 2.911540  | -0.826670 | 3.798741  |
| H  | 2.198689  | 1.007469  | 4.693138  |
| H  | 3.351446  | -2.667905 | 2.756266  |
| H  | 3.819105  | -0.869907 | 4.404242  |
| S  | 1.098043  | -3.186594 | 1.026371  |
| O  | 2.382558  | -4.032266 | 1.059893  |
| O  | 0.841677  | -2.725319 | -0.350433 |
| O  | -0.000103 | -3.882747 | 1.700586  |
| Cu | 1.236377  | 0.413477  | -0.689503 |
| C  | -2.423518 | -0.289766 | 2.943831  |
| C  | -2.646469 | -0.925780 | 4.167755  |
| C  | -2.636481 | 1.092068  | 2.846068  |
| C  | -3.078104 | -0.194099 | 5.275942  |
| H  | -2.474026 | -2.002670 | 4.252362  |
| C  | -3.065893 | 1.823967  | 3.949144  |
| H  | -2.450037 | 1.599643  | 1.893834  |
| C  | -3.287734 | 1.180009  | 5.169586  |
| H  | -3.249422 | -0.702573 | 6.227804  |
| H  | -3.227288 | 2.901664  | 3.858155  |
| H  | -3.623985 | 1.752105  | 6.037680  |
| N  | -0.536904 | -0.617795 | 1.378939  |
| N  | -1.622614 | -0.354685 | -0.486027 |
| C  | 3.312085  | 0.221707  | -0.537677 |
| C  | 3.383712  | -1.068111 | -1.056358 |
| O  | 3.816054  | -2.032545 | -0.299154 |
| C  | 3.042419  | -1.410754 | -2.470821 |
| Al | 3.780487  | -3.847765 | -0.190247 |
| C  | 2.992376  | 1.451624  | -1.293948 |
| C  | 3.611869  | 2.711592  | -0.800199 |
| H  | 3.129468  | 1.336420  | -2.374401 |
| C  | 3.734253  | 2.999330  | 0.567606  |
| C  | 4.040983  | 3.675976  | -1.724316 |
| H  | 3.633752  | 0.319099  | 0.504738  |
| C  | 0.760484  | 2.203591  | -2.854354 |
| H  | 1.160146  | 1.453289  | -3.545975 |
| C  | 3.265436  | -4.789306 | -1.833290 |
| C  | 5.381637  | -4.413454 | 0.787431  |
| H  | 5.639070  | -3.733097 | 1.617264  |
| H  | 6.279734  | -4.472686 | 0.148767  |
| H  | 5.261667  | -5.415544 | 1.234417  |
| H  | 3.919630  | -4.578905 | -2.696785 |
| H  | 2.233825  | -4.564204 | -2.152342 |
| H  | 3.307467  | -5.882679 | -1.682741 |
| C  | 4.266474  | 4.214279  | 0.995461  |
| H  | 3.389185  | 2.275635  | 1.311496  |
| C  | 4.582878  | 4.886403  | -1.298000 |
| H  | 3.936185  | 3.470541  | -2.794295 |
| C  | 4.693538  | 5.162924  | 0.065702  |
| H  | 4.343719  | 4.423201  | 2.065582  |
| H  | 4.917468  | 5.620712  | -2.035083 |
| H  | 5.110335  | 6.115057  | 0.402825  |
| H  | 3.932694  | -1.802917 | -2.986877 |

|   |           |           |           |
|---|-----------|-----------|-----------|
| H | 2.655475  | -0.561817 | -3.048685 |
| H | 2.290793  | -2.212853 | -2.483290 |
| C | 1.125059  | 2.251424  | -1.559536 |
| H | 0.017401  | 2.895017  | -3.274406 |
| C | 0.703454  | 3.322470  | -0.643487 |
| C | 0.483691  | 3.081760  | 0.725114  |
| C | 0.527677  | 4.638143  | -1.112692 |
| C | 0.068329  | 4.098129  | 1.582142  |
| H | 0.646570  | 2.073116  | 1.119988  |
| C | 0.117505  | 5.656912  | -0.256736 |
| H | 0.728174  | 4.858289  | -2.165265 |
| C | -0.117455 | 5.392420  | 1.094239  |
| H | -0.102213 | 3.879920  | 2.640235  |
| H | -0.012538 | 6.670074  | -0.645678 |
| H | -0.433039 | 6.194859  | 1.765464  |
| H | -6.546990 | -3.124960 | -0.879029 |
| H | -5.259105 | -5.157363 | -1.526287 |
| C | -5.460621 | -3.146407 | -0.763047 |
| C | -4.739941 | -4.283774 | -1.124316 |
| C | -4.794205 | -2.030446 | -0.254011 |
| C | -3.351353 | -4.303685 | -0.972500 |
| H | -2.782249 | -5.193415 | -1.252951 |
| C | -3.404869 | -2.044967 | -0.097964 |
| C | -2.685835 | -3.192088 | -0.461671 |
| H | -1.597923 | -3.212119 | -0.341374 |
| H | -5.356728 | -1.134322 | 0.026410  |
| C | -2.950540 | 0.498324  | -3.854315 |
| C | -2.105095 | -0.261006 | -4.656575 |
| H | -2.244869 | -0.257041 | -5.741112 |
| C | -1.074505 | -1.028332 | -4.095494 |
| C | -0.136619 | -1.820182 | -4.948465 |
| C | -2.804674 | 0.543206  | -2.459220 |
| C | -1.795032 | -0.258166 | -1.893630 |
| C | -0.951161 | -1.026349 | -2.702358 |
| H | -0.203722 | -1.655804 | -2.208039 |
| H | -0.598608 | -2.113538 | -5.900345 |
| H | 0.210403  | -2.730611 | -4.441039 |
| H | 0.763597  | -1.236740 | -5.202523 |
| H | -3.729413 | 1.110077  | -4.318078 |
| H | -1.986977 | 2.371557  | -0.630902 |
| H | -3.404655 | 3.909019  | 0.705807  |
| C | -3.075558 | 2.346663  | -0.742499 |
| C | -3.872351 | 3.211336  | 0.005380  |
| C | -3.653745 | 1.444797  | -1.651384 |
| C | -5.260893 | 3.187178  | -0.135929 |
| H | -5.885353 | 3.860235  | 0.456464  |
| C | -5.049549 | 1.443645  | -1.798581 |
| C | -5.846155 | 2.302686  | -1.042897 |
| H | -5.512419 | 0.743131  | -2.499881 |
| H | -6.932331 | 2.278677  | -1.161217 |
| H | -3.423449 | -0.023526 | 0.578096  |

113

Scheme\_S11\_S.XXII / electronic energy: -4776.97661758 a.u. / lowest freq: -269.78 cm<sup>-1</sup>

|    |           |           |           |
|----|-----------|-----------|-----------|
| C  | 2.152584  | -0.226337 | -2.461585 |
| O  | 2.295962  | -1.493398 | -2.192580 |
| C  | -2.933997 | -0.475358 | 0.073131  |
| H  | -3.358658 | -1.074917 | -0.743072 |
| C  | -2.851905 | 1.005163  | -0.335351 |
| H  | -3.412811 | 1.653057  | 0.358741  |
| C  | -0.654481 | 0.202801  | 0.044388  |
| C  | -1.080604 | -2.058402 | 0.819336  |
| C  | -0.757397 | -2.024393 | 2.179976  |
| C  | -1.064247 | -3.291528 | 0.148041  |
| C  | -0.461025 | -3.195355 | 2.871748  |
| H  | -0.760879 | -1.058641 | 2.693676  |
| C  | -0.771715 | -4.465263 | 0.844089  |
| C  | -0.483780 | -4.419702 | 2.206421  |
| H  | -0.211835 | -3.148439 | 3.934401  |
| H  | -0.761684 | -5.410958 | 0.299071  |
| H  | -0.259745 | -5.343896 | 2.743603  |
| C  | -0.863331 | 2.572090  | -0.510533 |
| C  | -0.339443 | 2.768959  | -1.789172 |
| C  | -0.959275 | 3.638245  | 0.405275  |
| C  | 0.109479  | 4.023948  | -2.215114 |
| C  | -0.528601 | 4.899280  | -0.036184 |
| C  | -0.006518 | 5.089668  | -1.312221 |
| H  | 0.321670  | 6.087872  | -1.615082 |
| S  | -1.376173 | -3.413866 | -1.612485 |
| O  | -0.289211 | -2.499278 | -2.221038 |
| O  | -2.700078 | -2.846330 | -1.885592 |
| O  | -1.152738 | -4.810716 | -1.996781 |
| Cu | 1.299625  | 0.340005  | -0.063180 |
| C  | -3.674985 | -0.808523 | 1.341707  |

|    |           |           |           |
|----|-----------|-----------|-----------|
| C  | -4.267693 | -2.073271 | 1.455688  |
| C  | -3.702260 | 0.053067  | 2.443595  |
| C  | -4.866653 | -2.472654 | 2.648984  |
| H  | -4.243671 | -2.751262 | 0.596499  |
| C  | -4.302717 | -0.344014 | 3.638056  |
| H  | -3.242356 | 1.042953  | 2.376108  |
| C  | -4.882248 | -1.608963 | 3.745041  |
| H  | -5.323890 | -3.462280 | 2.723126  |
| H  | -4.317218 | 0.339682  | 4.490854  |
| H  | -5.350874 | -1.919788 | 4.681935  |
| N  | -1.477692 | -0.849806 | 0.183731  |
| N  | -1.397865 | 1.292204  | -0.183161 |
| C  | 2.648848  | 0.754808  | -1.610552 |
| C  | 1.481018  | 0.151424  | -3.740899 |
| Al | 1.426983  | -2.996307 | -2.783627 |
| H  | -0.588287 | 5.745196  | 0.654051  |
| C  | 3.394677  | 0.473042  | -0.371163 |
| C  | 0.691096  | 4.205400  | -3.579636 |
| C  | 4.391996  | 1.500034  | 0.027003  |
| H  | 3.804575  | -0.544646 | -0.360170 |
| C  | 4.125712  | 2.874613  | -0.075136 |
| C  | 5.639344  | 1.096726  | 0.526000  |
| H  | 2.549940  | 1.791737  | -1.941046 |
| C  | 2.404311  | 1.349866  | 2.268906  |
| H  | 2.398138  | 1.324582  | 3.366894  |
| C  | 1.382667  | -3.171682 | -4.736876 |
| C  | 2.116743  | -4.473429 | -1.697272 |
| H  | 1.606063  | -4.550471 | -0.722460 |
| H  | 3.194982  | -4.372512 | -1.483316 |
| H  | 1.984422  | -5.452978 | -2.187000 |
| H  | 2.375021  | -3.067686 | -5.209118 |
| H  | 0.718814  | -2.446887 | -5.237092 |
| H  | 1.015178  | -4.172506 | -5.025576 |
| C  | 5.076254  | 3.814676  | 0.316857  |
| H  | 3.153975  | 3.216693  | -0.445611 |
| C  | 6.593076  | 2.036935  | 0.910290  |
| H  | 5.858298  | 0.028122  | 0.612673  |
| C  | 6.314879  | 3.400715  | 0.810001  |
| H  | 4.847237  | 4.880375  | 0.236740  |
| H  | 7.561135  | 1.701488  | 1.290809  |
| H  | 7.060807  | 4.138855  | 1.114281  |
| H  | 2.020842  | -0.290336 | -4.592324 |
| H  | 1.437331  | 1.236792  | -3.890356 |
| H  | 0.455609  | -0.250145 | -3.779096 |
| C  | 2.556759  | 0.243924  | 1.521607  |
| H  | 2.267959  | 2.340660  | 1.821701  |
| C  | 2.866386  | -1.091057 | 2.043635  |
| C  | 3.433517  | -1.258488 | 3.322595  |
| C  | 2.625235  | -2.241861 | 1.269978  |
| C  | 3.712777  | -2.527256 | 3.820156  |
| H  | 3.665561  | -0.377393 | 3.926842  |
| C  | 2.911865  | -3.511444 | 1.768138  |
| H  | 2.203235  | -2.122075 | 0.262901  |
| C  | 3.451676  | -3.660246 | 3.045889  |
| H  | 4.151063  | -2.633247 | 4.815953  |
| H  | 2.714274  | -4.392828 | 1.153305  |
| H  | 3.681537  | -4.656212 | 3.432343  |
| H  | -2.845537 | 0.203954  | -4.947370 |
| H  | -4.022472 | 2.347445  | -5.432816 |
| C  | -3.153571 | 0.858247  | -4.127779 |
| C  | -3.813632 | 2.058892  | -4.399736 |
| C  | -2.883961 | 0.488800  | -2.811549 |
| C  | -4.210072 | 2.885039  | -3.348492 |
| H  | -4.731338 | 3.823181  | -3.554110 |
| C  | -3.271680 | 1.318966  | -1.750509 |
| C  | -3.937876 | 2.516142  | -2.030703 |
| H  | -4.232463 | 3.171697  | -1.204739 |
| H  | -2.361581 | -0.452685 | -2.610055 |
| H  | 1.743951  | 3.880757  | -3.615664 |
| H  | 0.672574  | 5.256437  | -3.895378 |
| H  | 0.153216  | 3.613165  | -4.333600 |
| H  | -0.311240 | 1.915458  | -2.472164 |
| H  | -3.634332 | 4.888216  | 4.010429  |
| C  | -2.434441 | 4.334564  | 2.307644  |
| C  | -2.871723 | 4.206771  | 3.625466  |
| C  | -1.463760 | 3.464762  | 1.785575  |
| C  | -2.335271 | 3.218243  | 4.451470  |
| H  | -2.671947 | 3.124952  | 5.486864  |
| C  | -0.942355 | 2.465316  | 2.624347  |
| C  | -1.365121 | 2.351046  | 3.946808  |
| H  | -0.175432 | 1.786630  | 2.239136  |
| H  | -0.934988 | 1.574805  | 4.586072  |
| H  | -2.855235 | 5.115071  | 1.667005  |

99

Scheme\_S11\_S.XXIII / electronic energy: -4393.80164026 a.u. / lowest freq: -239.66 cm<sup>-1</sup>

|    |           |           |           |
|----|-----------|-----------|-----------|
| C  | 2.941350  | -2.005941 | -0.190359 |
| O  | 3.364082  | -1.137974 | -1.071630 |
| C  | -1.118352 | 2.492746  | 1.913821  |
| H  | -0.496148 | 3.382140  | 2.092007  |
| C  | -0.950242 | 1.466735  | 3.038173  |
| H  | -1.890145 | 1.264973  | 3.573862  |
| C  | -0.178244 | 0.488804  | 1.047445  |
| C  | -0.308412 | 2.407356  | -0.481667 |
| C  | -1.371727 | 2.588634  | -1.370756 |
| C  | 0.955570  | 2.923470  | -0.816717 |
| C  | -1.180109 | 3.262786  | -2.575307 |
| H  | -2.352690 | 2.183012  | -1.113018 |
| C  | 1.143773  | 3.600967  | -2.020989 |
| C  | 0.076147  | 3.770409  | -2.900627 |
| H  | -2.019757 | 3.385246  | -3.263300 |
| H  | 2.133567  | 3.996111  | -2.256736 |
| H  | 0.230011  | 4.302852  | -3.841595 |
| C  | -0.178362 | -0.950539 | 3.023999  |
| C  | 1.152173  | -1.198305 | 3.413770  |
| C  | -1.220117 | -1.854956 | 3.301449  |
| C  | 1.428558  | -2.403976 | 4.070701  |
| C  | -0.897291 | -3.045524 | 3.964738  |
| C  | 0.415156  | -3.320865 | 4.340579  |
| H  | 0.649219  | -4.255984 | 4.855360  |
| S  | 2.370858  | 2.715142  | 0.261721  |
| O  | 2.717293  | 1.219028  | 0.064740  |
| O  | 1.938209  | 2.949642  | 1.640241  |
| O  | 3.454709  | 3.549609  | -0.269283 |
| Cu | 0.569473  | -0.838269 | -0.202395 |
| C  | -2.533340 | 2.915937  | 1.612781  |
| C  | -2.837271 | 4.260795  | 1.383345  |
| C  | -3.548928 | 1.958576  | 1.484192  |
| C  | -4.132243 | 4.645631  | 1.032172  |
| H  | -2.045608 | 5.010978  | 1.471793  |
| C  | -4.841056 | 2.339254  | 1.131175  |
| H  | -3.317056 | 0.901083  | 1.649520  |
| C  | -5.135166 | 3.685855  | 0.902922  |
| H  | -4.356794 | 5.700232  | 0.855007  |
| H  | -5.623761 | 1.583024  | 1.030811  |
| H  | -6.148533 | 3.985419  | 0.624969  |
| N  | -0.527170 | 1.751651  | 0.758231  |
| N  | -0.473733 | 0.266280  | 2.336467  |
| C  | 1.703993  | -2.626036 | -0.292171 |
| C  | 3.871819  | -2.356973 | 0.923696  |
| Al | 4.136534  | 0.508508  | -0.928289 |
| H  | -1.692815 | -3.764156 | 4.180616  |
| C  | 0.781286  | -2.587794 | -1.470126 |
| C  | -2.624673 | -1.568531 | 2.878350  |
| H  | -0.205319 | 1.783973  | 3.784057  |
| C  | 2.225510  | -0.201200 | 3.127742  |
| H  | 2.456572  | -2.615842 | 4.377825  |
| C  | -0.106072 | -0.730746 | -2.104852 |
| H  | -2.698065 | -1.390877 | 1.793276  |
| H  | -3.028070 | -0.668382 | 3.367527  |
| H  | -3.296051 | -2.399327 | 3.127775  |
| H  | 1.980208  | 0.792514  | 3.530778  |
| H  | 2.361147  | -0.044246 | 2.045820  |
| H  | 3.186802  | -0.512542 | 3.555524  |
| C  | -0.456866 | -3.409506 | -1.256494 |
| C  | 1.490581  | -2.823249 | -2.784799 |
| C  | -1.049768 | -3.510173 | 0.015287  |
| C  | -1.089301 | -4.076922 | -2.317937 |
| H  | 1.462910  | -3.334416 | 0.504804  |
| C  | 0.735635  | 0.034322  | -2.819341 |
| H  | 1.820668  | -0.034432 | -2.702146 |
| H  | 0.367720  | 0.776993  | -3.541611 |
| C  | 5.743442  | 0.550339  | 0.198872  |
| C  | 4.214781  | 1.267265  | -2.736675 |
| H  | 3.288329  | 1.784524  | -3.039745 |
| H  | 4.403657  | 0.499785  | -3.508189 |
| H  | 5.024860  | 2.010056  | -2.836604 |
| H  | 6.463040  | -0.255465 | -0.028149 |
| H  | 5.523803  | 0.479177  | 1.278394  |
| H  | 6.293559  | 1.498547  | 0.063717  |
| C  | -1.552947 | -0.768578 | -2.329268 |
| C  | -2.463657 | -0.868263 | -1.262134 |
| C  | -2.074925 | -0.709761 | -3.636257 |
| C  | -3.837742 | -0.880613 | -1.483415 |
| C  | -3.449620 | -0.721417 | -3.859230 |
| C  | -4.337972 | -0.807662 | -2.784966 |
| H  | -3.832577 | -0.671786 | -4.881851 |

|   |           |           |           |
|---|-----------|-----------|-----------|
| H | -5.415890 | -0.826762 | -2.962984 |
| H | -2.066331 | -0.933232 | -0.244704 |
| H | -4.524590 | -0.957342 | -0.635325 |
| H | -1.382967 | -0.657906 | -4.482247 |
| C | -2.213374 | -4.246571 | 0.220038  |
| H | -0.604450 | -2.977583 | 0.862909  |
| C | -2.258935 | -4.809519 | -2.117478 |
| H | -0.670130 | -4.025751 | -3.324380 |
| C | -2.827460 | -4.902117 | -0.847957 |
| H | -2.646036 | -4.305157 | 1.222473  |
| H | -2.727371 | -5.315314 | -2.965609 |
| H | -3.741958 | -5.479063 | -0.690921 |
| H | 1.854565  | -3.864575 | -2.799857 |
| H | 2.363176  | -2.171282 | -2.888025 |
| H | 0.852136  | -2.674306 | -3.663951 |
| H | 4.765002  | -2.847030 | 0.504543  |
| H | 3.422863  | -3.036760 | 1.657610  |
| H | 4.234275  | -1.457004 | 1.439861  |

99

Scheme\_S11\_S.XXIV / electronic energy: -4393.79583611 a.u. / lowest freq: -258.44 cm<sup>-1</sup>

|    |           |           |           |
|----|-----------|-----------|-----------|
| C  | 1.164032  | -3.092130 | 0.565535  |
| H  | 0.615733  | -3.942528 | 0.135910  |
| C  | 0.778636  | -2.870137 | 2.030955  |
| H  | 1.632314  | -2.988255 | 2.715817  |
| C  | 0.166392  | -0.949081 | 0.824468  |
| C  | 0.576073  | -1.720227 | -1.476611 |
| C  | 1.731007  | -1.378645 | -2.188959 |
| C  | -0.605845 | -1.988568 | -2.191505 |
| C  | 1.706505  | -1.269759 | -3.577517 |
| H  | 2.655120  | -1.195847 | -1.637358 |
| C  | -0.628786 | -1.871210 | -3.582064 |
| C  | 0.523711  | -1.507134 | -4.274713 |
| H  | 2.617387  | -0.992825 | -4.113309 |
| H  | -1.557800 | -2.083915 | -4.114460 |
| H  | 0.496286  | -1.418294 | -5.362819 |
| C  | -0.180239 | -0.855057 | 3.240562  |
| C  | -1.560179 | -0.865957 | 3.522442  |
| C  | 0.754600  | -0.249315 | 4.100390  |
| C  | -1.991483 | -0.251355 | 4.705204  |
| C  | 0.277835  | 0.349699  | 5.272649  |
| C  | -1.082171 | 0.346855  | 5.574154  |
| H  | -1.437448 | 0.818221  | 6.493941  |
| S  | -2.106936 | -2.544425 | -1.381666 |
| O  | -3.011858 | -3.010119 | -2.438969 |
| O  | -2.657388 | -1.254898 | -0.741082 |
| O  | -1.727246 | -3.501600 | -0.340442 |
| Cu | -0.458421 | 0.878485  | 0.523706  |
| C  | 2.637269  | -3.241290 | 0.281666  |
| C  | 3.094426  | -4.239513 | -0.583544 |
| C  | 3.559886  | -2.330420 | 0.814390  |
| C  | 4.447770  | -4.327012 | -0.914509 |
| H  | 2.378245  | -4.948592 | -1.009394 |
| C  | 4.909934  | -2.412793 | 0.483056  |
| H  | 3.211390  | -1.537361 | 1.483214  |
| C  | 5.357007  | -3.412243 | -0.385215 |
| H  | 4.791792  | -5.111321 | -1.593157 |
| H  | 5.617549  | -1.691759 | 0.900214  |
| H  | 6.415837  | -3.476572 | -0.647472 |
| N  | 0.630577  | -1.846385 | -0.064276 |
| N  | 0.281344  | -1.487821 | 2.046300  |
| C  | -1.998244 | 1.999066  | -0.316021 |
| C  | -3.041493 | 1.645146  | 0.536888  |
| O  | -4.039554 | 0.929148  | 0.106687  |
| C  | -3.159089 | 2.026400  | 1.977572  |
| Al | -4.188339 | -0.304043 | -1.234596 |
| H  | 0.989714  | 0.831234  | 5.948787  |
| C  | -0.856445 | 2.945409  | -0.116567 |
| C  | 2.205926  | -0.211934 | 3.749193  |
| H  | -0.013041 | -3.558986 | 2.363845  |
| C  | -2.530048 | -1.485334 | 2.570791  |
| H  | -3.059519 | -0.248944 | 4.940820  |
| C  | 0.771425  | 2.438061  | 1.120201  |
| H  | 2.363771  | 0.207183  | 2.742539  |
| H  | 2.660094  | -1.215206 | 3.747245  |
| H  | 2.773745  | 0.401284  | 4.460089  |
| H  | -2.251387 | -2.513598 | 2.296781  |
| H  | -2.566617 | -0.936892 | 1.615964  |
| H  | -3.545431 | -1.505967 | 2.986940  |
| C  | -0.116108 | 3.167905  | -1.408869 |
| C  | -1.210331 | 4.214245  | 0.626100  |
| C  | 0.092275  | 2.111157  | -2.314231 |
| C  | 0.407706  | 4.423883  | -1.749846 |
| H  | -2.138525 | 1.639818  | -1.339383 |

|   |           |           |           |
|---|-----------|-----------|-----------|
| C | 0.597257  | 2.698892  | 2.428101  |
| H | -0.381555 | 2.729003  | 2.915446  |
| H | 1.454269  | 2.877849  | 3.092512  |
| C | -5.781577 | -1.360499 | -0.816956 |
| C | -3.913777 | 0.437236  | -3.036552 |
| H | -2.855174 | 0.641515  | -3.277796 |
| H | -4.448008 | 1.391060  | -3.192369 |
| H | -4.278191 | -0.247954 | -3.822123 |
| H | -6.718920 | -0.781612 | -0.883286 |
| H | -5.740656 | -1.763930 | 0.210093  |
| H | -5.905176 | -2.227454 | -1.487702 |
| C | 2.093274  | 2.537954  | 0.490795  |
| C | 2.565783  | 1.544465  | -0.382679 |
| C | 2.924021  | 3.646437  | 0.742254  |
| C | 3.826457  | 1.634622  | -0.965511 |
| C | 4.182866  | 3.743091  | 0.153185  |
| C | 4.639994  | 2.738852  | -0.702717 |
| H | 4.811526  | 4.612966  | 0.360638  |
| H | 5.624985  | 2.820102  | -1.168749 |
| H | 1.913749  | 0.690587  | -0.589147 |
| H | 4.174426  | 0.843953  | -1.637093 |
| H | 2.565121  | 4.440965  | 1.403803  |
| C | 0.779032  | 2.304222  | -3.509574 |
| H | -0.272686 | 1.106227  | -2.066737 |
| C | 1.104327  | 4.617988  | -2.942606 |
| H | 0.276467  | 5.274763  | -1.079785 |
| C | 1.290091  | 3.562000  | -3.831931 |
| H | 0.920074  | 1.463126  | -4.192825 |
| H | 1.498525  | 5.609789  | -3.178206 |
| H | 1.829838  | 3.715724  | -4.769330 |
| H | -1.927264 | 4.787686  | 0.015147  |
| H | -0.343137 | 4.854181  | 0.828281  |
| H | -1.693636 | 4.021503  | 1.587383  |
| H | -3.802337 | 2.914039  | 2.086113  |
| H | -2.198661 | 2.242120  | 2.455944  |
| H | -3.652499 | 1.215573  | 2.529120  |

113

Scheme\_S12\_XLIV / electronic energy: -4409.29483899 a.u. / lowest freq: -120.00 cm-1

|    |           |           |           |
|----|-----------|-----------|-----------|
| C  | -2.022150 | 0.389869  | 1.585978  |
| H  | -2.040953 | -0.539645 | 2.172899  |
| C  | -2.814668 | 0.209327  | 0.279839  |
| H  | -3.356306 | 1.142492  | 0.029280  |
| C  | -0.507292 | 0.329883  | -0.227360 |
| C  | 0.458718  | 0.760801  | 1.957823  |
| C  | 1.157708  | 1.971094  | 1.909019  |
| C  | 0.871761  | -0.249674 | 2.845236  |
| C  | 2.244371  | 2.198653  | 2.750085  |
| H  | 0.829682  | 2.736221  | 1.198403  |
| C  | 1.952301  | -0.001896 | 3.694293  |
| C  | 2.633230  | 1.213284  | 3.655960  |
| H  | 2.777322  | 3.151029  | 2.701326  |
| H  | 2.272287  | -0.799325 | 4.368877  |
| H  | 3.479084  | 1.383631  | 4.326806  |
| C  | -2.017298 | 0.001321  | -2.116600 |
| C  | -2.046426 | -1.244980 | -2.775685 |
| C  | -2.277844 | 1.209561  | -2.799451 |
| C  | -2.335520 | -1.257246 | -4.145964 |
| C  | -2.569506 | 1.142937  | -4.166836 |
| C  | -2.598194 | -0.077423 | -4.836109 |
| H  | -2.824639 | -0.108521 | -5.905113 |
| S  | 0.109334  | -1.895730 | 2.910982  |
| O  | 1.154325  | -2.762757 | 3.503927  |
| O  | -0.230584 | -2.228359 | 1.501590  |
| O  | -1.086361 | -1.746705 | 3.782106  |
| Cu | 1.137733  | 0.281562  | -1.207971 |
| C  | -2.493243 | 1.513043  | 2.472540  |
| C  | -2.888469 | 1.242006  | 3.786565  |
| C  | -2.531552 | 2.836118  | 2.011214  |
| C  | -3.329305 | 2.271071  | 4.620615  |
| H  | -2.830779 | 0.212957  | 4.153105  |
| C  | -2.966646 | 3.864676  | 2.843565  |
| H  | -2.208760 | 3.061354  | 0.989076  |
| C  | -3.370933 | 3.583126  | 4.151005  |
| H  | -3.635978 | 2.045546  | 5.645118  |
| H  | -2.989052 | 4.892493  | 2.472571  |
| H  | -3.712658 | 4.389997  | 4.804254  |
| N  | -0.647719 | 0.595097  | 1.084269  |
| N  | -1.730237 | 0.041418  | -0.718721 |
| H  | -2.773356 | 2.067119  | -4.716002 |
| C  | -2.245091 | 2.559042  | -2.108309 |
| C  | -1.709770 | -2.532663 | -2.055416 |
| H  | -2.349776 | -2.210851 | -4.681129 |
| H  | -1.927696 | 2.397684  | -1.066708 |

|   |           |           |           |
|---|-----------|-----------|-----------|
| H | -1.748691 | -2.326686 | -0.974855 |
| C | -2.700027 | -3.648676 | -2.353717 |
| H | -2.646505 | -3.986200 | -3.400814 |
| H | -2.493002 | -4.527751 | -1.725260 |
| H | -3.738383 | -3.340021 | -2.158268 |
| C | -0.275863 | -2.945485 | -2.367274 |
| H | 0.015282  | -3.837068 | -1.792021 |
| H | -0.141192 | -3.175981 | -3.437457 |
| H | 0.430184  | -2.144896 | -2.100586 |
| C | -3.624235 | 3.208184  | -2.077438 |
| H | -4.377839 | 2.559926  | -1.605453 |
| H | -3.602498 | 4.153643  | -1.514467 |
| H | -3.983930 | 3.442674  | -3.091683 |
| C | -1.209592 | 3.483840  | -2.735351 |
| H | -1.144650 | 4.432937  | -2.181770 |
| H | -0.212564 | 3.021617  | -2.718861 |
| H | -1.452926 | 3.730235  | -3.780781 |
| C | 2.193463  | 1.582600  | -2.478233 |
| H | 1.633671  | 1.841885  | -3.385690 |
| C | -3.820455 | -0.916685 | 0.277606  |
| C | -5.048265 | -0.738002 | -0.370803 |
| C | -3.549964 | -2.151319 | 0.886840  |
| C | -5.994806 | -1.762788 | -0.407742 |
| H | -5.265266 | 0.222185  | -0.849637 |
| C | -4.497766 | -3.172901 | 0.853630  |
| H | -2.584186 | -2.319224 | 1.375797  |
| C | -5.722531 | -2.982600 | 0.210110  |
| H | -6.949345 | -1.603638 | -0.915697 |
| H | -4.275737 | -4.129092 | 1.334653  |
| H | -6.463475 | -3.785971 | 0.190023  |
| C | 2.721805  | 0.213053  | -2.409709 |
| H | 3.772068  | 0.151425  | -2.075607 |
| O | 3.294735  | -0.819439 | 0.361350  |
| B | 2.569608  | -1.108238 | -0.780454 |
| O | 2.852740  | -2.375123 | -1.248458 |
| C | 3.650839  | -3.063035 | -0.248828 |
| C | 4.271765  | -1.875619 | 0.559584  |
| C | 4.663929  | -3.935107 | -0.960092 |
| H | 5.344235  | -4.414411 | -0.240316 |
| H | 4.152924  | -4.736164 | -1.512824 |
| H | 5.269514  | -3.370042 | -1.680185 |
| C | 2.703791  | -3.915386 | 0.576781  |
| H | 2.187603  | -4.627992 | -0.082213 |
| H | 3.240446  | -4.499168 | 1.338617  |
| H | 1.938440  | -3.312069 | 1.083398  |
| C | 4.413541  | -2.135079 | 2.042858  |
| H | 3.443694  | -2.346855 | 2.513764  |
| H | 5.084606  | -2.987641 | 2.228452  |
| H | 4.851010  | -1.258046 | 2.541747  |
| C | 5.579317  | -1.373865 | -0.029770 |
| H | 5.869228  | -0.434716 | 0.463188  |
| H | 6.399910  | -2.091644 | 0.112533  |
| H | 5.489307  | -1.171225 | -1.107583 |
| C | 2.449709  | -0.621323 | -3.641300 |
| H | 2.672253  | -1.685241 | -3.493064 |
| H | 1.395636  | -0.540107 | -3.953195 |
| H | 3.056443  | -0.263020 | -4.489807 |
| C | 2.775889  | 2.681136  | -1.747958 |
| C | 3.658806  | 2.480192  | -0.651958 |
| C | 2.497298  | 4.031698  | -2.090179 |
| C | 4.216664  | 3.552192  | 0.038324  |
| H | 3.880427  | 1.459152  | -0.324260 |
| C | 3.051740  | 5.095537  | -1.389113 |
| H | 1.832809  | 4.232452  | -2.937198 |
| C | 3.921858  | 4.873257  | -0.313516 |
| H | 4.889631  | 3.350310  | 0.878291  |
| H | 2.809451  | 6.119652  | -1.690576 |
| H | 4.361645  | 5.711167  | 0.233111  |

113

Scheme\_512\_XLV / electronic energy: -4409.29464501 a.u. / lowest freq: -123.29 cm<sup>-1</sup>

|   |           |           |           |
|---|-----------|-----------|-----------|
| C | -2.362187 | 1.382879  | -0.176339 |
| H | -2.294928 | 2.021491  | 0.716223  |
| C | -2.739992 | -0.052534 | 0.221322  |
| H | -3.415811 | -0.490343 | -0.538780 |
| C | -0.486920 | -0.025016 | -0.499321 |
| C | -0.212449 | 2.303991  | -1.140370 |
| C | 0.148647  | 2.376576  | -2.490020 |
| C | 0.218095  | 3.302163  | -0.247824 |
| C | 0.915357  | 3.436865  | -2.966878 |
| H | -0.189526 | 1.580835  | -3.160418 |
| C | 0.970704  | 4.369955  | -0.742770 |
| C | 1.314296  | 4.445686  | -2.090779 |
| H | 1.192585  | 3.476858  | -4.023052 |

|    |           |           |           |
|----|-----------|-----------|-----------|
| H  | 1.311635  | 5.131720  | -0.037937 |
| H  | 1.908840  | 5.287688  | -2.453995 |
| C  | -1.373078 | -2.182096 | 0.236084  |
| C  | -0.926840 | -2.733292 | 1.454485  |
| C  | -1.775009 | -2.993015 | -0.846281 |
| C  | -0.871448 | -4.127330 | 1.562998  |
| C  | -1.712570 | -4.381969 | -0.683454 |
| C  | -1.262741 | -4.945277 | 0.506971  |
| H  | -1.207573 | -6.032537 | 0.609228  |
| S  | -0.109439 | 3.262282  | 1.538963  |
| O  | 0.958966  | 4.101367  | 2.129697  |
| O  | -0.039873 | 1.827692  | 1.924999  |
| O  | -1.467172 | 3.846510  | 1.702089  |
| Cu | 1.318399  | -0.495674 | -0.993974 |
| C  | -3.294229 | 2.043417  | -1.158935 |
| C  | -3.904336 | 3.258919  | -0.833130 |
| C  | -3.549829 | 1.470772  | -2.412427 |
| C  | -4.766106 | 3.884079  | -1.736309 |
| H  | -3.685243 | 3.717476  | 0.135638  |
| C  | -4.406273 | 2.094517  | -3.316283 |
| H  | -3.063925 | 0.527027  | -2.682449 |
| C  | -5.019971 | 3.303293  | -2.978095 |
| H  | -5.237534 | 4.833138  | -1.468988 |
| H  | -4.595790 | 1.637138  | -4.290723 |
| H  | -5.692547 | 3.793175  | -3.686686 |
| N  | -1.002108 | 1.200611  | -0.721756 |
| N  | -1.438330 | -0.761104 | 0.106566  |
| H  | -2.012357 | -5.032423 | -1.510881 |
| C  | -2.262749 | -2.416946 | -2.161959 |
| C  | -0.460288 | -1.848496 | 2.589593  |
| H  | -0.505980 | -4.578616 | 2.489817  |
| H  | -2.163614 | -1.321416 | -2.109153 |
| H  | -0.887507 | -0.849031 | 2.420360  |
| C  | -0.932448 | -2.330684 | 3.953177  |
| H  | -0.445838 | -3.271223 | 4.256274  |
| H  | -0.695499 | -1.586238 | 4.728016  |
| H  | -2.019969 | -2.498024 | 3.978481  |
| C  | 1.053606  | -1.680536 | 2.544383  |
| H  | 1.391913  | -0.981614 | 3.324173  |
| H  | 1.573907  | -2.640104 | 2.700682  |
| H  | 1.385267  | -1.275638 | 1.576080  |
| C  | -3.734499 | -2.736940 | -2.401433 |
| H  | -4.375296 | -2.382595 | -1.579762 |
| H  | -4.096160 | -2.266168 | -3.328380 |
| H  | -3.901546 | -3.821049 | -2.500907 |
| C  | -1.400815 | -2.872371 | -3.332516 |
| H  | -1.745161 | -2.414185 | -4.272149 |
| H  | -0.350692 | -2.581893 | -3.182928 |
| H  | -1.434763 | -3.964284 | -3.471136 |
| C  | 2.249982  | -1.912391 | -2.244232 |
| H  | 1.927442  | -1.927282 | -3.292379 |
| C  | -3.412881 | -0.205893 | 1.564383  |
| C  | -4.433514 | -1.152945 | 1.711708  |
| C  | -3.033176 | 0.557450  | 2.678887  |
| C  | -5.071063 | -1.335700 | 2.939315  |
| H  | -4.735260 | -1.751955 | 0.846591  |
| C  | -3.674318 | 0.378241  | 3.903500  |
| H  | -2.218365 | 1.283895  | 2.591951  |
| C  | -4.694591 | -0.565557 | 4.038960  |
| H  | -5.867933 | -2.077655 | 3.033203  |
| H  | -3.371073 | 0.982170  | 4.762685  |
| H  | -5.195683 | -0.699359 | 5.001114  |
| C  | 3.110649  | -0.790926 | -1.837317 |
| H  | 4.011236  | -1.098431 | -1.280077 |
| O  | 3.323309  | 1.740847  | -0.383796 |
| B  | 2.926929  | 0.443326  | -0.149288 |
| O  | 3.578960  | -0.085819 | 0.955921  |
| C  | 4.249386  | 1.001118  | 1.644817  |
| C  | 4.430487  | 2.053035  | 0.501627  |
| C  | 5.544231  | 0.476147  | 2.227304  |
| H  | 6.128428  | 1.288825  | 2.684289  |
| H  | 5.333488  | -0.260625 | 3.015267  |
| H  | 6.171763  | -0.015906 | 1.473315  |
| C  | 3.327281  | 1.483230  | 2.751172  |
| H  | 3.121690  | 0.654698  | 3.443151  |
| H  | 3.787021  | 2.293922  | 3.335034  |
| H  | 2.363648  | 1.843093  | 2.364076  |
| C  | 4.302389  | 3.493824  | 0.944197  |
| H  | 3.311958  | 3.700707  | 1.372216  |
| H  | 5.067825  | 3.744067  | 1.694399  |
| H  | 4.449355  | 4.167884  | 0.087602  |
| C  | 5.704896  | 1.842975  | -0.299433 |
| H  | 5.691027  | 2.485296  | -1.191536 |

|   |          |           |           |
|---|----------|-----------|-----------|
| H | 6.602990 | 2.100564  | 0.280187  |
| H | 5.806230 | 0.801070  | -0.638192 |
| C | 3.421247 | 0.173052  | -2.962032 |
| H | 3.868221 | 1.113844  | -2.618529 |
| H | 4.116954 | -0.292315 | -3.680067 |
| H | 2.511742 | 0.430814  | -3.526438 |
| C | 2.254854 | -3.177193 | -1.552582 |
| C | 1.740112 | -4.357875 | -2.152028 |
| C | 2.771953 | -3.315134 | -0.234875 |
| C | 1.740402 | -5.578219 | -1.488960 |
| H | 1.346392 | -4.298866 | -3.172173 |
| C | 2.762937 | -4.541572 | 0.423735  |
| H | 3.173329 | -2.433484 | 0.276943  |
| C | 2.248519 | -5.688941 | -0.188135 |
| H | 1.336249 | -6.462257 | -1.993281 |
| H | 3.166063 | -4.602450 | 1.440116  |
| H | 2.246497 | -6.649347 | 0.333794  |

113

Scheme\_S12\_XLVI / electronic energy: -4409.29233449 a.u. / lowest freq: -111.38 cm<sup>-1</sup>

|    |           |           |           |
|----|-----------|-----------|-----------|
| C  | -1.962808 | -1.241240 | 1.179587  |
| H  | -1.962989 | -2.325064 | 0.996546  |
| C  | -2.745559 | -0.498196 | 0.071786  |
| H  | -3.520091 | 0.146262  | 0.525012  |
| C  | -0.486562 | 0.228616  | 0.056308  |
| C  | 0.490918  | -1.101855 | 1.836509  |
| C  | 1.172256  | -0.091590 | 2.530476  |
| C  | 0.915210  | -2.437306 | 1.973287  |
| C  | 2.235933  | -0.391537 | 3.375209  |
| H  | 0.839964  | 0.943265  | 2.402193  |
| C  | 1.967895  | -2.725192 | 2.846245  |
| C  | 2.624263  | -1.718923 | 3.550445  |
| H  | 2.750349  | 0.413940  | 3.904616  |
| H  | 2.290985  | -3.765253 | 2.926653  |
| H  | 3.448818  | -1.971216 | 4.221687  |
| C  | -2.046613 | 1.431787  | -1.410854 |
| C  | -1.848447 | 1.254324  | -2.793917 |
| C  | -2.617842 | 2.614534  | -0.888227 |
| C  | -2.237646 | 2.292304  | -3.651775 |
| C  | -2.994159 | 3.618379  | -1.786173 |
| C  | -2.809814 | 3.459202  | -3.157769 |
| H  | -3.108550 | 4.255251  | -3.844761 |
| S  | 0.263479  | -3.807801 | 0.976510  |
| O  | 1.291215  | -4.865969 | 1.080813  |
| O  | 0.127815  | -3.231244 | -0.389353 |
| O  | -1.034750 | -4.186911 | 1.591840  |
| Cu | 1.154046  | 1.048302  | -0.526885 |
| C  | -2.516618 | -0.988440 | 2.559893  |
| C  | -3.383377 | -1.921679 | 3.139061  |
| C  | -2.230196 | 0.193852  | 3.255717  |
| C  | -3.965850 | -1.672083 | 4.381968  |
| H  | -3.596525 | -2.853244 | 2.606861  |
| C  | -2.809523 | 0.443123  | 4.498908  |
| H  | -1.538708 | 0.922525  | 2.821614  |
| C  | -3.682243 | -0.488652 | 5.064170  |
| H  | -4.640314 | -2.410385 | 4.823019  |
| H  | -2.574959 | 1.368446  | 5.031673  |
| H  | -4.135458 | -0.295069 | 6.039649  |
| N  | -0.593117 | -0.717047 | 1.011164  |
| N  | -1.701835 | 0.385301  | -0.503024 |
| H  | -3.426964 | 4.546661  | -1.403188 |
| C  | -2.744726 | 2.838944  | 0.604812  |
| C  | -1.185355 | 0.021303  | -3.369210 |
| H  | -2.083597 | 2.179571  | -4.728922 |
| H  | -2.693648 | 1.858333  | 1.098673  |
| H  | -1.050962 | -0.706433 | -2.552598 |
| C  | -2.039383 | -0.639890 | -4.442660 |
| H  | -2.140219 | -0.006463 | -5.338182 |
| H  | -1.588710 | -1.589172 | -4.768416 |
| H  | -3.053962 | -0.861575 | -4.078490 |
| C  | 0.202315  | 0.372533  | -3.893681 |
| H  | 0.717816  | -0.517220 | -4.282994 |
| H  | 0.153110  | 1.117206  | -4.704997 |
| H  | 0.834751  | 0.783033  | -3.090603 |
| C  | -4.065414 | 3.474606  | 1.011117  |
| H  | -4.928609 | 2.905947  | 0.633036  |
| H  | -4.152165 | 3.515949  | 2.107143  |
| H  | -4.164062 | 4.508080  | 0.645554  |
| C  | -1.549288 | 3.639690  | 1.111138  |
| H  | -1.562269 | 3.733956  | 2.208723  |
| H  | -0.599930 | 3.157762  | 0.825002  |
| H  | -1.544018 | 4.659294  | 0.692704  |
| C  | 1.890845  | 3.022608  | -0.742042 |
| C  | -3.436157 | -1.356593 | -0.960718 |

|   |           |           |           |
|---|-----------|-----------|-----------|
| C | -4.677729 | -0.944229 | -1.461393 |
| C | -2.867333 | -2.543417 | -1.444515 |
| C | -5.350574 | -1.703626 | -2.418845 |
| H | -5.126378 | -0.018962 | -1.084413 |
| C | -3.543650 | -3.302975 | -2.399062 |
| H | -1.890498 | -2.876291 | -1.072101 |
| C | -4.785388 | -2.889635 | -2.886633 |
| H | -6.322052 | -1.370851 | -2.793173 |
| H | -3.095052 | -4.230128 | -2.765557 |
| H | -5.312027 | -3.492434 | -3.631039 |
| C | 2.735227  | 1.954669  | -1.288392 |
| H | 2.763691  | 1.911958  | -2.384770 |
| O | 3.652792  | -0.572564 | -0.142566 |
| B | 2.727204  | -0.130835 | -1.073154 |
| O | 2.922546  | -0.728213 | -2.301717 |
| C | 4.194597  | -1.425880 | -2.261667 |
| C | 4.382509  | -1.683887 | -0.732750 |
| C | 5.234430  | -0.475334 | -2.831925 |
| H | 6.227765  | -0.941602 | -2.898953 |
| H | 4.938274  | -0.169953 | -3.845625 |
| H | 5.326972  | 0.436044  | -2.223344 |
| C | 4.090260  | -2.674462 | -3.108397 |
| H | 3.954127  | -2.406413 | -4.165868 |
| H | 5.005412  | -3.280610 | -3.035303 |
| H | 3.238876  | -3.298877 | -2.810611 |
| C | 3.717917  | -2.966598 | -0.270780 |
| H | 2.662543  | -3.017777 | -0.573016 |
| H | 4.232829  | -3.857599 | -0.658288 |
| H | 3.746040  | -3.020988 | 0.824968  |
| C | 5.816075  | -1.623438 | -0.251643 |
| H | 5.857540  | -1.801442 | 0.832537  |
| H | 6.428375  | -2.398360 | -0.736538 |
| H | 6.280530  | -0.647842 | -0.445084 |
| H | 3.745892  | 1.868802  | -0.866239 |
| C | 2.186178  | 3.546822  | 0.575405  |
| C | 2.995862  | 2.835421  | 1.507391  |
| C | 1.686996  | 4.802703  | 1.016053  |
| C | 3.264129  | 3.338431  | 2.774831  |
| H | 3.396666  | 1.854031  | 1.230391  |
| C | 1.958262  | 5.295473  | 2.288652  |
| H | 1.069721  | 5.399242  | 0.338877  |
| C | 2.749013  | 4.573568  | 3.188421  |
| H | 3.889981  | 2.754836  | 3.457629  |
| H | 1.550676  | 6.268317  | 2.582061  |
| H | 2.963848  | 4.964034  | 4.186122  |
| C | 1.075121  | 3.852198  | -1.696997 |
| H | 0.097606  | 4.156675  | -1.284691 |
| H | 1.581054  | 4.791319  | -2.001714 |
| H | 0.863480  | 3.299550  | -2.625501 |

113

Scheme\_S12\_XLVII / electronic energy: -4409.29204653 a.u. / lowest freq: -46.64 cm<sup>-1</sup>

|    |           |           |           |
|----|-----------|-----------|-----------|
| C  | 2.225168  | -1.498558 | -0.211866 |
| H  | 2.209504  | -2.342352 | 0.491980  |
| C  | 2.633610  | -0.194462 | 0.509368  |
| H  | 3.441805  | 0.308525  | -0.052225 |
| C  | 0.421574  | 0.038898  | -0.323586 |
| C  | 0.052534  | -2.114297 | -1.381911 |
| C  | -0.446784 | -1.689439 | -2.621018 |
| C  | -0.277246 | -3.398082 | -0.909770 |
| C  | -1.251633 | -2.518288 | -3.395881 |
| H  | -0.188542 | -0.681591 | -2.960615 |
| C  | -1.069089 | -4.228621 | -1.708500 |
| C  | -1.552441 | -3.802614 | -2.943155 |
| H  | -1.631388 | -2.164468 | -4.357539 |
| H  | -1.330433 | -5.214126 | -1.317197 |
| H  | -2.175203 | -4.469532 | -3.544273 |
| C  | 1.439660  | 2.023886  | 0.701828  |
| C  | 0.901604  | 2.456536  | 1.930595  |
| C  | 2.044917  | 2.924090  | -0.202052 |
| C  | 0.945541  | 3.826100  | 2.219266  |
| C  | 2.067195  | 4.281342  | 0.134891  |
| C  | 1.517947  | 4.731947  | 1.331751  |
| H  | 1.533887  | 5.798165  | 1.573319  |
| S  | 0.169086  | -4.006314 | 0.740829  |
| O  | -0.772428 | -5.120414 | 0.992996  |
| O  | -0.027607 | -2.830910 | 1.629324  |
| O  | 1.584489  | -4.446645 | 0.642788  |
| Cu | -1.376376 | 0.639066  | -0.753180 |
| C  | 3.140415  | -1.848892 | -1.358799 |
| C  | 4.154239  | -2.795391 | -1.173476 |
| C  | 3.038020  | -1.200921 | -2.597275 |
| C  | 5.058626  | -3.076155 | -2.198032 |
| H  | 4.226768  | -3.317410 | -0.215192 |

|   |           |           |           |
|---|-----------|-----------|-----------|
| C | 3.938885  | -1.482642 | -3.622745 |
| H | 2.236458  | -0.473833 | -2.762246 |
| C | 4.954916  | -2.419530 | -3.424427 |
| H | 5.845050  | -3.818289 | -2.039265 |
| H | 3.844647  | -0.970980 | -4.584129 |
| H | 5.660397  | -2.642642 | -4.228724 |
| N | 0.850039  | -1.199447 | -0.651817 |
| N | 1.410898  | 0.635216  | 0.370955  |
| H | 2.517423  | 4.996853  | -0.559990 |
| C | 2.667210  | 2.465045  | -1.505599 |
| C | 0.252262  | 1.496654  | 2.904438  |
| H | 0.515064  | 4.188402  | 3.157483  |
| H | 2.565729  | 1.372605  | -1.558256 |
| H | 0.496704  | 0.475263  | 2.574389  |
| C | 0.782961  | 1.661799  | 4.322075  |
| H | 0.492567  | 2.627668  | 4.764672  |
| H | 0.382888  | 0.876336  | 4.980586  |
| H | 1.881142  | 1.598153  | 4.359724  |
| C | -1.263694 | 1.627973  | 2.848046  |
| H | -1.751187 | 0.891754  | 3.505307  |
| H | -1.599081 | 2.631457  | 3.158902  |
| H | -1.633989 | 1.444609  | 1.828984  |
| C | 4.155776  | 2.785826  | -1.566731 |
| H | 4.704721  | 2.361377  | -0.712517 |
| H | 4.606292  | 2.377272  | -2.484304 |
| H | 4.341342  | 3.871407  | -1.569424 |
| C | 1.925361  | 3.021653  | -2.711676 |
| H | 2.351040  | 2.630821  | -3.649149 |
| H | 0.863355  | 2.740110  | -2.679935 |
| H | 1.976044  | 4.121007  | -2.758684 |
| C | -2.131876 | 2.031241  | -2.217619 |
| C | 3.110451  | -0.336093 | 1.935275  |
| C | 4.143968  | 0.491490  | 2.391843  |
| C | 2.537078  | -1.258646 | 2.822125  |
| C | 4.609241  | 0.397412  | 3.704040  |
| H | 4.596130  | 1.212442  | 1.702883  |
| C | 3.004173  | -1.352120 | 4.132628  |
| H | 1.717543  | -1.905379 | 2.485768  |
| C | 4.041369  | -0.529571 | 4.577443  |
| H | 5.421589  | 1.046253  | 4.041146  |
| H | 2.553045  | -2.078297 | 4.814054  |
| H | 4.406085  | -0.611518 | 5.604621  |
| C | -3.100573 | 1.151351  | -1.584292 |
| H | -3.507750 | 0.366011  | -2.233967 |
| O | -3.462793 | -1.510738 | -0.344767 |
| B | -2.985980 | -0.284871 | 0.082913  |
| O | -3.706829 | 0.172462  | 1.173469  |
| C | -4.845211 | -0.711686 | 1.357693  |
| C | -4.337992 | -2.026908 | 0.691700  |
| C | -6.017976 | -0.093845 | 0.614797  |
| H | -6.947776 | -0.659610 | 0.771455  |
| H | -6.185479 | 0.931560  | 0.974456  |
| H | -5.829875 | -0.042708 | -0.467397 |
| C | -5.144797 | -0.818647 | 2.835838  |
| H | -5.489163 | 0.149652  | 3.226614  |
| H | -5.940308 | -1.554392 | 3.026643  |
| H | -4.259431 | -1.113415 | 3.413044  |
| C | -3.489850 | -2.864331 | 1.632604  |
| H | -2.724378 | -2.257035 | 2.135442  |
| H | -4.102878 | -3.358231 | 2.400798  |
| H | -2.954134 | -3.644904 | 1.075182  |
| C | -5.409338 | -2.872823 | 0.040369  |
| H | -4.956669 | -3.764322 | -0.417388 |
| H | -6.145669 | -3.219488 | 0.780790  |
| H | -5.944133 | -2.330078 | -0.749657 |
| C | -1.911644 | 3.349226  | -1.643895 |
| C | -2.277732 | 3.650263  | -0.302148 |
| C | -1.337242 | 4.412222  | -2.387808 |
| C | -2.068310 | 4.908742  | 0.248711  |
| H | -2.715593 | 2.863273  | 0.321448  |
| C | -1.137864 | 5.672572  | -1.830887 |
| H | -1.044218 | 4.242050  | -3.427367 |
| C | -1.497930 | 5.939747  | -0.507087 |
| H | -2.353828 | 5.089788  | 1.290044  |
| H | -0.694400 | 6.463119  | -2.444821 |
| H | -1.336591 | 6.928935  | -0.071177 |
| H | -3.882289 | 1.614521  | -0.967830 |
| C | -1.788493 | 1.796764  | -3.663654 |
| H | -2.406440 | 2.410593  | -4.349211 |
| H | -0.740778 | 2.026050  | -3.918766 |
| H | -1.963303 | 0.749307  | -3.949124 |

104

Scheme\_S13\_S.XXV / electronic energy: -4451.87872350 a.u. / lowest freq: -299.91 cm<sup>-1</sup>

|    |           |           |           |
|----|-----------|-----------|-----------|
| C  | 0.166455  | -2.754844 | 1.044974  |
| H  | -0.671941 | -3.453906 | 0.926983  |
| C  | 0.044453  | -1.973792 | 2.356170  |
| H  | 0.786789  | -2.281557 | 3.106602  |
| C  | 0.189643  | -0.437420 | 0.597757  |
| C  | -0.131821 | -1.877896 | -1.331095 |
| C  | 0.875207  | -1.484496 | -2.216953 |
| C  | -1.318570 | -2.435876 | -1.841456 |
| C  | 0.714219  | -1.632047 | -3.591228 |
| H  | 1.786484  | -1.046312 | -1.807614 |
| C  | -1.463811 | -2.599472 | -3.221643 |
| C  | -0.455724 | -2.198289 | -4.095324 |
| H  | 1.509226  | -1.302768 | -4.264311 |
| H  | -2.393998 | -3.023583 | -3.604575 |
| H  | -0.590952 | -2.323167 | -5.171910 |
| C  | 0.168098  | 0.535899  | 2.829992  |
| C  | -1.093654 | 0.912032  | 3.342918  |
| C  | 1.343353  | 1.255660  | 3.148373  |
| C  | -1.149263 | 2.001859  | 4.221098  |
| C  | 1.225607  | 2.348695  | 4.015060  |
| C  | -0.004465 | 2.714803  | 4.554711  |
| H  | -0.069311 | 3.567631  | 5.235140  |
| S  | -2.690855 | -2.953895 | -0.797361 |
| O  | -3.897775 | -2.849150 | -1.673648 |
| O  | -2.793799 | -1.940551 | 0.303001  |
| O  | -2.381225 | -4.320279 | -0.344113 |
| Cu | 0.357101  | 1.287473  | -0.286934 |
| C  | 1.467932  | -3.496622 | 0.854090  |
| C  | 1.479388  | -4.888827 | 0.729527  |
| C  | 2.682099  | -2.798512 | 0.790620  |
| C  | 2.683232  | -5.575535 | 0.561084  |
| H  | 0.533124  | -5.437239 | 0.759764  |
| C  | 3.884200  | -3.482098 | 0.625561  |
| H  | 2.681251  | -1.705052 | 0.865679  |
| C  | 3.887333  | -4.874702 | 0.512429  |
| H  | 2.678194  | -6.663893 | 0.462897  |
| H  | 4.824886  | -2.926393 | 0.582153  |
| H  | 4.829859  | -5.411334 | 0.379343  |
| N  | 0.052401  | -1.657337 | 0.054434  |
| N  | 0.253587  | -0.580628 | 1.934259  |
| H  | 2.114279  | 2.926672  | 4.275741  |
| C  | 2.698076  | 0.844935  | 2.600301  |
| C  | -2.374304 | 0.185286  | 2.981343  |
| H  | -2.114787 | 2.303376  | 4.636313  |
| H  | 2.543835  | 0.543136  | 1.548307  |
| H  | -2.172946 | -0.439651 | 2.097250  |
| C  | -2.829055 | -0.729527 | 4.117951  |
| H  | -3.133706 | -0.141835 | 4.998493  |
| H  | -3.694840 | -1.336641 | 3.812374  |
| H  | -2.041475 | -1.420302 | 4.451164  |
| C  | -3.508070 | 1.136893  | 2.609146  |
| H  | -4.360793 | 0.575171  | 2.196338  |
| H  | -3.891359 | 1.685205  | 3.483296  |
| H  | -3.212254 | 1.887254  | 1.861949  |
| C  | 3.252385  | -0.357468 | 3.360692  |
| H  | 2.564103  | -1.214080 | 3.359171  |
| H  | 4.203477  | -0.697599 | 2.922371  |
| H  | 3.449562  | -0.099775 | 4.413469  |
| C  | 3.715450  | 1.974455  | 2.597354  |
| H  | 4.625919  | 1.666023  | 2.065149  |
| H  | 3.337498  | 2.874768  | 2.093507  |
| H  | 4.022958  | 2.255064  | 3.616739  |
| C  | -1.235022 | 2.609877  | -0.194849 |
| H  | -1.389737 | 2.924336  | 0.846248  |
| H  | -0.954173 | -2.094017 | 2.801517  |
| C  | -0.097835 | 3.134311  | -0.901432 |
| H  | -0.155710 | 3.100914  | -1.999169 |
| Na | -4.724545 | -0.988825 | -0.561894 |
| O  | 3.289610  | 2.079714  | -0.553214 |
| B  | 2.147737  | 1.609208  | -1.166934 |
| O  | 2.376759  | 1.329228  | -2.500931 |
| C  | 3.706841  | 1.810463  | -2.843517 |
| C  | 4.407952  | 1.833919  | -1.450178 |
| C  | 3.536147  | 3.194617  | -3.444685 |
| H  | 4.490422  | 3.611215  | -3.796926 |
| H  | 2.856889  | 3.138940  | -4.306597 |
| H  | 3.100035  | 3.899288  | -2.722174 |
| C  | 4.322918  | 0.863869  | -3.849422 |
| H  | 3.773000  | 0.907009  | -4.800218 |
| H  | 5.367154  | 1.138230  | -4.060580 |
| H  | 4.307264  | -0.177453 | -3.502225 |
| C  | 4.988932  | 0.482502  | -1.065203 |
| H  | 4.257103  | -0.325374 | -1.214841 |

|   |           |          |           |
|---|-----------|----------|-----------|
| H | 5.889668  | 0.238690 | -1.646172 |
| H | 5.268756  | 0.487124 | -0.001769 |
| C | 5.431232  | 2.931423 | -1.269808 |
| H | 5.878806  | 2.875545 | -0.267455 |
| H | 6.246530  | 2.834320 | -2.001868 |
| H | 4.987423  | 3.928936 | -1.380793 |
| C | 0.658555  | 4.298148 | -0.337001 |
| H | 1.653563  | 4.413434 | -0.787461 |
| H | 0.110666  | 5.240542 | -0.508689 |
| H | 0.799198  | 4.204234 | 0.750607  |
| C | -2.205213 | 1.775845 | -0.786600 |
| H | -2.811387 | 1.135714 | -0.144901 |
| H | -1.988010 | 1.348307 | -1.771383 |
| H | -7.144030 | 1.709517 | -2.470557 |
| O | -3.635150 | 2.823452 | -1.377922 |
| C | -4.771893 | 2.255805 | -1.356073 |
| O | -5.041050 | 1.091677 | -1.031299 |
| C | -7.068187 | 2.565261 | -1.784444 |
| H | -7.405533 | 2.245760 | -0.787789 |
| O | -5.756079 | 3.097643 | -1.751244 |
| H | -7.721089 | 3.369288 | -2.141533 |

104

Scheme\_S13\_S.XXVI / electronic energy: -4451.87751112 a.u. / lowest freq: -312.00 cm<sup>-1</sup>

|    |           |           |           |
|----|-----------|-----------|-----------|
| C  | -1.675031 | -2.669629 | 0.820655  |
| H  | -2.548006 | -2.319369 | 1.390123  |
| C  | -0.438709 | -2.721683 | 1.720434  |
| H  | 0.097853  | -3.683283 | 1.663271  |
| C  | -0.101872 | -1.019092 | 0.140245  |
| C  | -2.147709 | -1.126985 | -1.153914 |
| C  | -1.784053 | -1.345136 | -2.486804 |
| C  | -3.327929 | -0.421569 | -0.865889 |
| C  | -2.582536 | -0.878213 | -3.526536 |
| H  | -0.857242 | -1.889439 | -2.688436 |
| C  | -4.127696 | 0.039811  | -1.914982 |
| C  | -3.760432 | -0.188553 | -3.238967 |
| H  | -2.285101 | -1.055023 | -4.562511 |
| H  | -5.033637 | 0.602076  | -1.679441 |
| H  | -4.394642 | 0.181371  | -4.047443 |
| C  | 1.715706  | -1.427636 | 1.752351  |
| C  | 1.887193  | -0.460166 | 2.762810  |
| C  | 2.779310  | -2.233744 | 1.298844  |
| C  | 3.170788  | -0.288183 | 3.292397  |
| C  | 4.041728  | -2.032568 | 1.869289  |
| C  | 4.238077  | -1.066819 | 2.852199  |
| H  | 5.232629  | -0.920291 | 3.281804  |
| S  | -3.875828 | -0.068275 | 0.813673  |
| O  | -4.675793 | 1.189574  | 0.704109  |
| O  | -2.646670 | 0.204551  | 1.628561  |
| O  | -4.645132 | -1.246489 | 1.251731  |
| Cu | 0.615235  | 0.532845  | -0.864618 |
| C  | -2.059531 | -3.931518 | 0.088634  |
| C  | -3.416532 | -4.225060 | -0.093356 |
| C  | -1.101260 | -4.779189 | -0.481357 |
| C  | -3.808054 | -5.347450 | -0.823581 |
| H  | -4.165085 | -3.553221 | 0.338657  |
| C  | -1.491072 | -5.901233 | -1.210215 |
| H  | -0.035946 | -4.560698 | -0.358444 |
| C  | -2.846458 | -6.188855 | -1.382420 |
| H  | -4.870677 | -5.565430 | -0.956256 |
| H  | -0.732390 | -6.555168 | -1.647465 |
| H  | -3.151307 | -7.068891 | -1.954049 |
| N  | -1.283958 | -1.594947 | -0.135154 |
| N  | 0.411547  | -1.638954 | 1.210040  |
| H  | 4.884483  | -2.643825 | 1.532467  |
| C  | 2.589933  | -3.301800 | 0.240234  |
| C  | 0.732747  | 0.407574  | 3.219252  |
| H  | 3.337814  | 0.468356  | 4.063639  |
| H  | 1.549446  | -3.238444 | -0.114334 |
| H  | -0.199411 | -0.118781 | 2.957802  |
| C  | 0.719365  | 0.648438  | 4.721675  |
| H  | 1.566768  | 1.266102  | 5.055526  |
| H  | -0.195775 | 1.182058  | 5.017592  |
| H  | 0.749989  | -0.292629 | 5.290226  |
| C  | 0.731608  | 1.725326  | 2.449909  |
| H  | -0.137316 | 2.346462  | 2.722523  |
| H  | 1.637926  | 2.314919  | 2.660826  |
| H  | 0.710264  | 1.555345  | 1.360376  |
| C  | 2.799783  | -4.697739 | 0.817598  |
| H  | 2.132641  | -4.900778 | 1.668764  |
| H  | 2.612967  | -5.471435 | 0.057721  |
| H  | 3.833042  | -4.835048 | 1.173040  |
| C  | 3.481832  | -3.068743 | -0.971918 |
| H  | 3.268485  | -3.808745 | -1.757789 |

|    |           |           |           |
|----|-----------|-----------|-----------|
| H  | 3.329413  | -2.067982 | -1.401707 |
| H  | 4.548931  | -3.166013 | -0.717847 |
| C  | -0.715672 | 1.990760  | -1.641780 |
| H  | -0.682665 | -2.548153 | 2.779237  |
| C  | 0.681458  | 2.227311  | -1.915130 |
| H  | 1.152923  | 3.011167  | -1.303209 |
| Na | -3.193055 | 2.410836  | 2.065424  |
| O  | 3.258942  | 1.575830  | -0.032163 |
| B  | 2.622001  | 0.840963  | -1.014063 |
| O  | 3.485369  | 0.535121  | -2.046359 |
| C  | 4.823903  | 0.981446  | -1.682386 |
| C  | 4.530456  | 2.033559  | -0.564246 |
| C  | 5.496745  | 1.542347  | -2.916175 |
| H  | 6.479532  | 1.969071  | -2.666494 |
| H  | 5.661676  | 0.745119  | -3.654439 |
| H  | 4.897714  | 2.324625  | -3.398912 |
| C  | 5.585904  | -0.227015 | -1.172015 |
| H  | 5.601985  | -1.006911 | -1.945912 |
| H  | 6.628386  | 0.023160  | -0.928100 |
| H  | 5.112158  | -0.649093 | -0.274559 |
| C  | 5.545530  | 2.073091  | 0.556250  |
| H  | 5.637236  | 1.106838  | 1.067795  |
| H  | 6.538521  | 2.359472  | 0.179287  |
| H  | 5.249718  | 2.819189  | 1.307687  |
| C  | 4.294300  | 3.430047  | -1.116213 |
| H  | 3.892209  | 4.076020  | -0.322937 |
| H  | 5.221365  | 3.890286  | -1.486404 |
| H  | 3.565726  | 3.421725  | -1.939840 |
| C  | -1.393986 | 2.532553  | -0.532947 |
| C  | 1.130427  | 2.191064  | -3.347473 |
| H  | 0.720467  | 1.316188  | -3.875252 |
| H  | 0.767599  | 3.085278  | -3.882427 |
| H  | 2.221310  | 2.155957  | -3.456367 |
| H  | -1.329322 | 1.563396  | -2.445149 |
| H  | -2.400686 | 2.155004  | -0.334926 |
| H  | -0.814010 | 2.788051  | 0.358225  |
| H  | -4.431241 | 6.390969  | 1.060645  |
| O  | -1.902721 | 4.254625  | -0.892771 |
| C  | -2.478627 | 4.833181  | 0.086233  |
| O  | -2.748909 | 4.357570  | 1.196083  |
| C  | -3.462237 | 6.843913  | 0.807197  |
| H  | -2.859282 | 6.914623  | 1.723568  |
| O  | -2.792713 | 6.113990  | -0.207044 |
| H  | -3.628900 | 7.849786  | 0.406858  |

105

Scheme\_513\_S.XXVII / electronic energy: -4564.91431346 a.u. / lowest freq: -301.63 cm<sup>-1</sup>

|    |           |           |           |
|----|-----------|-----------|-----------|
| C  | 0.366911  | -2.685196 | -0.775976 |
| H  | -0.528816 | -3.213889 | -1.130893 |
| C  | 0.543857  | -2.857581 | 0.749077  |
| H  | 1.544731  | -3.265074 | 0.974235  |
| C  | 0.273679  | -0.557418 | 0.259416  |
| C  | -0.036656 | -0.554114 | -2.139717 |
| C  | 1.025725  | 0.194926  | -2.653069 |
| C  | -1.251880 | -0.595581 | -2.844462 |
| C  | 0.891933  | 0.892907  | -3.850647 |
| H  | 1.958872  | 0.232686  | -2.087462 |
| C  | -1.374786 | 0.090084  | -4.054417 |
| C  | -0.307543 | 0.831928  | -4.557629 |
| H  | 1.729771  | 1.483792  | -4.228063 |
| H  | -2.327504 | 0.050895  | -4.585340 |
| H  | -0.420583 | 1.370288  | -5.501236 |
| C  | 0.637844  | -1.065670 | 2.600062  |
| C  | -0.509737 | -0.762267 | 3.358718  |
| C  | 1.936086  | -0.960675 | 3.141426  |
| C  | -0.325324 | -0.349438 | 4.686609  |
| C  | 2.068770  | -0.553105 | 4.472758  |
| C  | 0.946236  | -0.249997 | 5.240739  |
| H  | 1.065772  | 0.073937  | 6.277669  |
| S  | -2.687421 | -1.466472 | -2.202166 |
| O  | -3.837162 | -0.974953 | -3.021976 |
| O  | -2.852082 | -0.991270 | -0.790255 |
| O  | -2.415839 | -2.908851 | -2.335161 |
| Cu | 0.362472  | 1.360763  | 0.581572  |
| C  | 1.538529  | -3.101552 | -1.628653 |
| C  | 1.323919  | -3.836169 | -2.799231 |
| C  | 2.841547  | -2.694745 | -1.312102 |
| C  | 2.392645  | -4.170502 | -3.632405 |
| H  | 0.305555  | -4.139805 | -3.060043 |
| C  | 3.909570  | -3.026533 | -2.142433 |
| H  | 3.017525  | -2.102558 | -0.408153 |
| C  | 3.686613  | -3.767068 | -3.305733 |
| H  | 2.211422  | -4.746261 | -4.543322 |
| H  | 4.921302  | -2.703622 | -1.883278 |

|    |           |           |           |
|----|-----------|-----------|-----------|
| H  | 4.523790  | -4.027494 | -3.957975 |
| N  | 0.133652  | -1.219373 | -0.898356 |
| N  | 0.499539  | -1.450086 | 1.231579  |
| H  | 3.070269  | -0.461218 | 4.901600  |
| H  | -1.205239 | -0.105183 | 5.288522  |
| C  | -1.189821 | 2.401830  | 1.478381  |
| H  | -1.298816 | 2.063973  | 2.516569  |
| C  | -0.054617 | 3.241785  | 1.171212  |
| Na | -4.724068 | 0.294165  | -1.298828 |
| O  | 3.315728  | 1.937547  | 0.991081  |
| B  | 2.222834  | 2.033963  | 0.149912  |
| O  | 2.571970  | 2.616481  | -1.053363 |
| C  | 3.932450  | 3.118287  | -0.941397 |
| C  | 4.508023  | 2.240913  | 0.214285  |
| C  | 3.839427  | 4.589970  | -0.576901 |
| H  | 4.830207  | 5.063693  | -0.526958 |
| H  | 3.254127  | 5.122797  | -1.339377 |
| H  | 3.341938  | 4.737832  | 0.392630  |
| C  | 4.622882  | 2.946813  | -2.276274 |
| H  | 4.154269  | 3.593463  | -3.031547 |
| H  | 5.684039  | 3.229881  | -2.212152 |
| H  | 4.566758  | 1.913729  | -2.642861 |
| C  | 5.067480  | 0.917065  | -0.281826 |
| H  | 4.347842  | 0.395335  | -0.930509 |
| H  | 5.995558  | 1.053582  | -0.848493 |
| H  | 5.290655  | 0.261497  | 0.571310  |
| C  | 5.506910  | 2.940257  | 1.107983  |
| H  | 5.853691  | 2.258340  | 1.897112  |
| H  | 6.390418  | 3.262089  | 0.537125  |
| H  | 5.074990  | 3.821903  | 1.598051  |
| C  | 0.740469  | 3.743530  | 2.346071  |
| H  | 1.737890  | 4.098933  | 2.050406  |
| H  | 0.222694  | 4.592180  | 2.828691  |
| H  | 0.880271  | 2.967545  | 3.113610  |
| C  | -2.256607 | 2.128466  | 0.598486  |
| H  | -2.927716 | 1.306211  | 0.854115  |
| H  | -2.118626 | 2.265597  | -0.478106 |
| H  | -6.728022 | 4.063430  | -1.279773 |
| O  | -3.519879 | 3.482997  | 0.773219  |
| C  | -4.633372 | 3.255568  | 0.203966  |
| O  | -4.957746 | 2.269147  | -0.469808 |
| C  | -6.792509 | 4.114064  | -0.183238 |
| H  | -7.310883 | 3.214776  | 0.178923  |
| O  | -5.515542 | 4.260472  | 0.412751  |
| H  | -7.371116 | 5.000192  | 0.100113  |
| C  | 3.137657  | -1.254423 | 2.304865  |
| H  | 4.057892  | -0.924291 | 2.803304  |
| H  | 3.247677  | -2.331556 | 2.097035  |
| H  | 3.078683  | -0.739784 | 1.334951  |
| C  | -1.897000 | -0.883784 | 2.812569  |
| H  | -1.938559 | -0.895895 | 1.715559  |
| H  | -2.372185 | -1.813366 | 3.165664  |
| H  | -2.533606 | -0.063226 | 3.173523  |
| C  | -0.139331 | 4.196145  | 0.010286  |
| H  | -0.773487 | 5.061694  | 0.272819  |
| H  | 0.851413  | 4.581277  | -0.266096 |
| H  | -0.570846 | 3.743813  | -0.894255 |
| C  | -0.480920 | -3.718237 | 1.448266  |
| C  | -0.102011 | -4.432671 | 2.591504  |
| C  | -1.815918 | -3.773147 | 1.026471  |
| C  | -1.033912 | -5.187576 | 3.303141  |
| H  | 0.939771  | -4.395107 | 2.925959  |
| C  | -2.744930 | -4.537233 | 1.731190  |
| H  | -2.141481 | -3.206053 | 0.149761  |
| C  | -2.359250 | -5.243997 | 2.871290  |
| H  | -0.721855 | -5.740043 | 4.192789  |
| H  | -3.782062 | -4.575779 | 1.388402  |
| H  | -3.090882 | -5.840862 | 3.421622  |

105

Scheme\_513\_S.XXVIII / electronic energy: -4564.91486367 a.u. / lowest freq: -281.95 cm<sup>-1</sup>

|   |           |           |           |
|---|-----------|-----------|-----------|
| C | -0.567467 | -2.704653 | -0.440124 |
| H | -1.619579 | -2.866262 | -0.715357 |
| C | -0.399693 | -2.680993 | 1.096614  |
| H | 0.465785  | -3.301853 | 1.390854  |
| C | 0.119505  | -0.543023 | 0.236217  |
| C | -0.152907 | -0.831696 | -2.140539 |
| C | 1.087980  | -0.503647 | -2.694731 |
| C | -1.324130 | -0.591469 | -2.879199 |
| C | 1.173962  | 0.045034  | -3.971449 |
| H | 1.986580  | -0.667486 | -2.095980 |
| C | -1.229590 | -0.057018 | -4.166279 |
| C | 0.012778  | 0.258618  | -4.712955 |
| H | 2.152258  | 0.307169  | -4.381614 |

|    |           |           |           |
|----|-----------|-----------|-----------|
| H  | -2.148723 | 0.134237  | -4.722979 |
| H  | 0.068996  | 0.684332  | -5.717241 |
| C  | 0.332255  | -0.756336 | 2.639331  |
| C  | -0.621251 | -0.099804 | 3.439538  |
| C  | 1.676319  | -0.896716 | 3.044247  |
| C  | -0.192791 | 0.425968  | 4.667607  |
| C  | 2.056878  | -0.355430 | 4.275761  |
| C  | 1.128883  | 0.301386  | 5.081943  |
| H  | 1.442271  | 0.724404  | 6.039667  |
| S  | -2.963353 | -0.869149 | -2.191711 |
| O  | -3.877431 | -0.047626 | -3.043769 |
| O  | -2.924199 | -0.287348 | -0.810036 |
| O  | -3.221040 | -2.318388 | -2.237699 |
| Cu | 0.780635  | 1.284694  | 0.010767  |
| C  | 0.278027  | -3.721309 | -1.163467 |
| C  | -0.317165 | -4.680172 | -1.988316 |
| C  | 1.675000  | -3.695169 | -1.048641 |
| C  | 0.468106  | -5.607113 | -2.676350 |
| H  | -1.405705 | -4.692613 | -2.095047 |
| C  | 2.459952  | -4.615655 | -1.737860 |
| H  | 2.149051  | -2.936400 | -0.416913 |
| C  | 1.856272  | -5.576941 | -2.552661 |
| H  | -0.008944 | -6.352979 | -3.316837 |
| H  | 3.548282  | -4.583217 | -1.642430 |
| H  | 2.471123  | -6.299754 | -3.094534 |
| N  | -0.180997 | -1.324675 | -0.811341 |
| N  | -0.041166 | -1.258589 | 1.354956  |
| H  | 3.098872  | -0.444010 | 4.595550  |
| H  | -0.917995 | 0.945447  | 5.300189  |
| C  | -0.591420 | 2.782195  | -0.377877 |
| C  | 0.760523  | 3.279173  | -0.267037 |
| Na | -4.214931 | 1.566962  | -1.422527 |
| O  | 3.629166  | 1.515599  | 1.038047  |
| B  | 2.802510  | 1.354866  | -0.055649 |
| O  | 3.536712  | 1.228829  | -1.221266 |
| C  | 4.934838  | 1.061817  | -0.861512 |
| C  | 4.988490  | 1.714369  | 0.556681  |
| C  | 5.791520  | 1.741786  | -1.906275 |
| H  | 6.854052  | 1.718242  | -1.622627 |
| H  | 5.695833  | 1.224444  | -2.871239 |
| H  | 5.500957  | 2.788445  | -2.061877 |
| C  | 5.209247  | -0.433290 | -0.840866 |
| H  | 4.956726  | -0.867145 | -1.819223 |
| H  | 6.266834  | -0.656767 | -0.640521 |
| H  | 4.601530  | -0.945425 | -0.080411 |
| C  | 5.949734  | 1.059257  | 1.522981  |
| H  | 5.718769  | -0.000573 | 1.686960  |
| H  | 6.984776  | 1.131035  | 1.157374  |
| H  | 5.908381  | 1.563639  | 2.498647  |
| C  | 5.226614  | 3.213813  | 0.506643  |
| H  | 5.058458  | 3.647878  | 1.502231  |
| H  | 6.256073  | 3.456118  | 0.206750  |
| H  | 4.540747  | 3.708573  | -0.196103 |
| C  | -1.469673 | 2.614303  | 0.710403  |
| C  | 1.391470  | 3.814053  | -1.522357 |
| H  | 1.126571  | 3.218450  | -2.408091 |
| H  | 1.051561  | 4.848514  | -1.710807 |
| H  | 2.488282  | 3.842193  | -1.456607 |
| H  | -0.993241 | 2.623808  | -1.388307 |
| H  | -2.341185 | 1.970290  | 0.589579  |
| H  | -1.062592 | 2.626934  | 1.723310  |
| H  | -5.075338 | 5.726751  | -1.325277 |
| O  | -2.449051 | 4.186552  | 1.037242  |
| C  | -3.487588 | 4.309293  | 0.315912  |
| O  | -3.968813 | 3.493629  | -0.482313 |
| C  | -5.265603 | 5.750573  | -0.242647 |
| H  | -6.052096 | 5.018559  | -0.009170 |
| O  | -4.085692 | 5.509867  | 0.503061  |
| H  | -5.613304 | 6.750796  | 0.038645  |
| C  | 1.190579  | 3.969384  | 1.000958  |
| H  | 2.281375  | 4.096743  | 1.031901  |
| H  | 0.734865  | 4.973621  | 1.069435  |
| H  | 0.907373  | 3.425354  | 1.913935  |
| C  | 2.668167  | -1.587671 | 2.166649  |
| H  | 3.689733  | -1.470048 | 2.548444  |
| H  | 2.469771  | -2.669247 | 2.093134  |
| H  | 2.640621  | -1.185785 | 1.141617  |
| C  | -2.052679 | 0.037450  | 3.030148  |
| H  | -2.201378 | -0.085413 | 1.949663  |
| H  | -2.676809 | -0.720067 | 3.531124  |
| H  | -2.458595 | 1.014113  | 3.328803  |
| C  | -1.590403 | -3.134624 | 1.904043  |
| C  | -1.372604 | -3.795595 | 3.119021  |

|   |           |           |          |
|---|-----------|-----------|----------|
| C | -2.907334 | -2.873420 | 1.501471 |
| C | -2.444050 | -4.190151 | 3.919810 |
| H | -0.345846 | -4.002894 | 3.437676 |
| C | -3.978669 | -3.276951 | 2.296671 |
| H | -3.100987 | -2.332766 | 0.569915 |
| C | -3.751605 | -3.934402 | 3.507116 |
| H | -2.256616 | -4.706891 | 4.864262 |
| H | -5.001180 | -3.071326 | 1.969954 |
| H | -4.594402 | -4.249213 | 4.127562 |

148

Scheme\_S14\_LX / electronic energy: -5327.02819082 a.u. / lowest freq: -134.97 cm-1

|    |           |           |           |
|----|-----------|-----------|-----------|
| Cu | -1.646252 | 0.686582  | -1.304551 |
| C  | -1.303735 | 1.697511  | -3.018248 |
| C  | -2.078371 | 2.484240  | -2.022293 |
| O  | -3.829133 | 1.899823  | 0.363945  |
| B  | -2.508142 | 1.969780  | -0.011658 |
| O  | -1.766943 | 2.753742  | 0.847514  |
| C  | -2.571877 | 3.000795  | 2.031339  |
| C  | -4.029863 | 2.797965  | 1.492863  |
| C  | -2.270877 | 4.397751  | 2.530877  |
| H  | -2.919586 | 4.659675  | 3.380030  |
| H  | -1.229728 | 4.454334  | 2.879970  |
| H  | -2.399981 | 5.159803  | 1.751606  |
| C  | -2.164263 | 1.969970  | 3.068506  |
| H  | -1.085617 | 2.070277  | 3.260171  |
| H  | -2.687675 | 2.122073  | 4.023936  |
| H  | -2.350979 | 0.940201  | 2.729348  |
| C  | -4.972657 | 2.132881  | 2.470370  |
| H  | -4.628710 | 1.129569  | 2.756532  |
| H  | -5.081536 | 2.738696  | 3.382529  |
| H  | -5.971212 | 2.027935  | 2.021576  |
| C  | -4.637549 | 4.075073  | 0.938218  |
| H  | -5.562863 | 3.839252  | 0.393354  |
| H  | -4.893533 | 4.785778  | 1.737236  |
| H  | -3.955141 | 4.581335  | 0.239834  |
| C  | 0.092333  | 2.057163  | -3.230632 |
| H  | -1.816810 | 1.471171  | -3.959027 |
| F  | 0.751927  | 1.169000  | -4.020235 |
| F  | 0.809379  | 2.153739  | -2.076126 |
| F  | 0.315513  | 3.274737  | -3.845811 |
| C  | -3.483200 | 2.805102  | -2.469870 |
| H  | -1.555536 | 3.372230  | -1.633607 |
| C  | -1.372692 | -3.363781 | -0.278743 |
| H  | -1.615286 | -3.526568 | 0.784139  |
| C  | 0.119398  | -2.995217 | -0.421027 |
| H  | 0.493558  | -3.339686 | -1.403930 |
| C  | -1.182751 | -1.063237 | -0.730264 |
| C  | -3.428517 | -1.896017 | -0.665607 |
| C  | -4.121295 | -1.690672 | -1.862284 |
| C  | -4.108064 | -1.802974 | 0.563199  |
| C  | -5.486143 | -1.410657 | -1.853387 |
| H  | -3.565183 | -1.744462 | -2.802046 |
| C  | -5.479118 | -1.536134 | 0.556601  |
| C  | -6.167889 | -1.343681 | -0.639121 |
| H  | -6.014731 | -1.246894 | -2.795418 |
| H  | -5.993606 | -1.451319 | 1.516360  |
| H  | -7.238799 | -1.127226 | -0.619969 |
| S  | -3.290836 | -1.974188 | 2.177955  |
| O  | -4.204434 | -1.306820 | 3.132650  |
| O  | -1.975121 | -1.294701 | 2.026667  |
| O  | -3.174493 | -3.438211 | 2.394380  |
| C  | -1.805310 | -4.567151 | -1.069569 |
| C  | -2.339227 | -5.681086 | -0.413578 |
| C  | -1.687326 | -4.592659 | -2.466395 |
| C  | -2.735660 | -6.807004 | -1.137484 |
| H  | -2.448173 | -5.654729 | 0.674577  |
| C  | -2.085777 | -5.713913 | -3.189941 |
| H  | -1.283912 | -3.719784 | -2.990028 |
| C  | -2.609439 | -6.826058 | -2.525798 |
| H  | -3.150214 | -7.671679 | -0.613213 |
| H  | -1.989979 | -5.721336 | -4.278684 |
| H  | -2.921701 | -7.706055 | -3.093783 |
| N  | -2.023036 | -2.115118 | -0.729117 |
| N  | 0.049931  | -1.519275 | -0.439954 |
| C  | 1.155213  | -0.676817 | -0.205109 |
| C  | 2.392694  | -0.940097 | -0.794828 |
| C  | 1.004757  | 0.396781  | 0.681372  |
| C  | 3.489720  | -0.114955 | -0.520036 |
| C  | 2.097545  | 1.211017  | 0.990482  |
| C  | 3.327723  | 0.955371  | 0.367545  |
| H  | 4.187497  | 1.590874  | 0.604052  |
| H  | 0.033693  | 0.559310  | 1.160011  |
| H  | 2.504943  | -1.787666 | -1.477100 |

|   |           |           |           |
|---|-----------|-----------|-----------|
| C | 1.973286  | 2.263813  | 2.040316  |
| C | 1.958368  | 3.635839  | 1.697823  |
| C | 1.871393  | 1.865163  | 3.395908  |
| C | 1.788825  | 4.584527  | 2.714387  |
| C | 1.697280  | 2.849307  | 4.377392  |
| C | 1.646097  | 4.199032  | 4.043356  |
| H | 1.760612  | 5.647313  | 2.454172  |
| H | 1.605283  | 2.550153  | 5.425753  |
| H | 1.504826  | 4.952889  | 4.822719  |
| C | 4.813822  | -0.368666 | -1.159678 |
| C | 5.747202  | -1.220149 | -0.525001 |
| C | 5.118887  | 0.244162  | -2.397592 |
| C | 7.004808  | -1.394987 | -1.117278 |
| C | 6.387375  | 0.038946  | -2.953884 |
| C | 7.328389  | -0.762774 | -2.314394 |
| H | 7.742791  | -2.042659 | -0.636961 |
| H | 6.640640  | 0.510746  | -3.907104 |
| H | 8.315639  | -0.909173 | -2.760820 |
| C | 4.099252  | 1.120565  | -3.103404 |
| H | 3.103271  | 0.776363  | -2.781734 |
| C | 4.145445  | 1.007884  | -4.620070 |
| H | 4.072722  | -0.035553 | -4.961248 |
| H | 3.308269  | 1.560982  | -5.069687 |
| H | 5.068905  | 1.431212  | -5.044431 |
| C | 4.226312  | 2.577978  | -2.669397 |
| H | 4.177419  | 2.684372  | -1.576475 |
| H | 5.185699  | 3.009854  | -2.997879 |
| H | 3.418556  | 3.190657  | -3.100001 |
| C | 5.406869  | -1.923620 | 0.778770  |
| H | 4.310845  | -2.061964 | 0.798695  |
| C | 5.770294  | -1.067428 | 1.988962  |
| H | 5.454666  | -1.556940 | 2.923515  |
| H | 6.858454  | -0.904288 | 2.048652  |
| H | 5.291726  | -0.078026 | 1.955497  |
| C | 6.039301  | -3.303319 | 0.894820  |
| H | 5.669421  | -3.823620 | 1.790179  |
| H | 5.814836  | -3.937472 | 0.024018  |
| H | 7.134514  | -3.252276 | 0.993549  |
| C | 1.966115  | 0.410635  | 3.830054  |
| H | 2.312764  | -0.181385 | 2.966135  |
| C | 2.110110  | 4.121396  | 0.268015  |
| H | 2.272673  | 3.242381  | -0.372407 |
| C | 0.839070  | 4.803294  | -0.225130 |
| H | -0.035317 | 4.147184  | -0.108470 |
| H | 0.635074  | 5.731842  | 0.333275  |
| H | 0.923047  | 5.073424  | -1.289668 |
| C | 3.323608  | 5.031351  | 0.111593  |
| H | 3.220345  | 5.956413  | 0.700829  |
| H | 4.253906  | 4.540550  | 0.436348  |
| H | 3.457872  | 5.334041  | -0.938060 |
| C | 0.604854  | -0.137154 | 4.246612  |
| H | 0.172691  | 0.455499  | 5.069606  |
| H | -0.120981 | -0.134904 | 3.420980  |
| H | 0.687064  | -1.173891 | 4.607013  |
| C | 2.992168  | 0.216466  | 4.941856  |
| H | 3.970994  | 0.645934  | 4.681224  |
| H | 2.671718  | 0.677859  | 5.888804  |
| H | 3.145275  | -0.854334 | 5.145505  |
| H | 0.040178  | -2.452470 | 2.243509  |
| H | 1.540109  | -3.368197 | 4.020825  |
| C | 0.839355  | -3.160113 | 1.991798  |
| C | 1.674644  | -3.677231 | 2.980850  |
| C | 1.007660  | -3.553388 | 0.656268  |
| C | 2.674015  | -4.596711 | 2.652663  |
| H | 3.325349  | -5.000357 | 3.432356  |
| C | 2.009662  | -4.474057 | 0.333744  |
| C | 2.835869  | -5.000057 | 1.327750  |
| H | 2.142189  | -4.778976 | -0.709261 |
| H | 3.614262  | -5.720493 | 1.063726  |
| O | -3.426291 | 3.612380  | -3.627469 |
| H | -4.053939 | 3.326029  | -1.679739 |
| H | -4.041141 | 1.867528  | -2.683057 |
| C | -4.694093 | 4.014204  | -4.050012 |
| H | -5.347111 | 3.155989  | -4.303150 |
| H | -4.578282 | 4.631492  | -4.950813 |
| H | -5.224090 | 4.615661  | -3.285363 |

148

Scheme\_S14\_LXI / electronic energy: -5327.02122721 a.u. / lowest freq: -118.63 cm<sup>-1</sup>

|    |           |           |           |
|----|-----------|-----------|-----------|
| Cu | -1.850432 | -1.179927 | -0.177566 |
| C  | -2.709549 | -2.406463 | -1.530551 |
| C  | -2.467076 | -3.059670 | -0.226877 |
| O  | -0.187624 | -2.799013 | 1.688230  |
| B  | -1.407022 | -2.187807 | 1.497612  |

|   |           |           |           |
|---|-----------|-----------|-----------|
| O | -2.096418 | -2.040032 | 2.686438  |
| C | -1.139759 | -2.255371 | 3.760859  |
| C | -0.097960 | -3.200190 | 3.081982  |
| C | -1.862213 | -2.850771 | 4.947604  |
| H | -1.154790 | -3.114154 | 5.747634  |
| H | -2.574732 | -2.124461 | 5.362924  |
| H | -2.426484 | -3.752273 | 4.677473  |
| C | -0.559423 | -0.894534 | 4.113554  |
| H | -1.374995 | -0.211397 | 4.390543  |
| H | 0.133579  | -0.951052 | 4.965377  |
| H | -0.020479 | -0.450143 | 3.262600  |
| C | 1.328938  | -3.000651 | 3.543428  |
| H | 1.690637  | -1.995795 | 3.288929  |
| H | 1.420970  | -3.142573 | 4.630756  |
| H | 1.995661  | -3.727450 | 3.056667  |
| C | -0.501252 | -4.662096 | 3.156629  |
| H | 0.142796  | -5.259230 | 2.497375  |
| H | -0.401469 | -5.062916 | 4.175469  |
| H | -1.540498 | -4.811593 | 2.829749  |
| C | -1.942775 | -2.881027 | -2.678311 |
| H | -3.757821 | -2.217780 | -1.790786 |
| F | -2.081122 | -2.098170 | -3.774951 |
| F | -2.281876 | -4.141152 | -3.120860 |
| F | -0.605363 | -2.976182 | -2.435077 |
| C | -3.708756 | -3.461455 | 0.527425  |
| H | -1.704244 | -3.852927 | -0.241744 |
| C | -1.837905 | 2.949812  | 0.519213  |
| H | -2.156551 | 3.626609  | -0.287834 |
| C | -0.309833 | 2.724132  | 0.473750  |
| H | 0.125874  | 2.957482  | 1.459619  |
| C | -1.399849 | 0.663707  | 0.064805  |
| C | -3.736336 | 1.282984  | 0.166612  |
| C | -4.240508 | 0.379547  | 1.110826  |
| C | -4.590346 | 1.825079  | -0.809538 |
| C | -5.583010 | 0.010065  | 1.093095  |
| H | -3.553254 | -0.039564 | 1.853219  |
| C | -5.936469 | 1.450788  | -0.808405 |
| C | -6.435946 | 0.553144  | 0.132770  |
| H | -5.959842 | -0.699793 | 1.833698  |
| H | -6.581671 | 1.862678  | -1.587508 |
| H | -7.491513 | 0.271468  | 0.109296  |
| S | -4.024323 | 2.951237  | -2.117007 |
| O | -5.080298 | 2.879949  | -3.148849 |
| O | -2.710776 | 2.413514  | -2.541544 |
| O | -3.937266 | 4.285160  | -1.460146 |
| C | -2.391030 | 3.448636  | 1.831450  |
| C | -3.447282 | 4.366992  | 1.829985  |
| C | -1.927161 | 2.947003  | 3.054898  |
| C | -4.016494 | 4.789727  | 3.032270  |
| H | -3.824099 | 4.729802  | 0.868329  |
| C | -2.495019 | 3.369186  | 4.255129  |
| H | -1.116864 | 2.210928  | 3.070583  |
| C | -3.541323 | 4.294343  | 4.246347  |
| H | -4.838851 | 5.509701  | 3.019287  |
| H | -2.122304 | 2.971448  | 5.202777  |
| H | -3.986572 | 4.626489  | 5.187609  |
| N | -2.352200 | 1.592859  | 0.221704  |
| N | -0.199754 | 1.274878  | 0.220847  |
| C | 1.051543  | 0.657400  | 0.060776  |
| C | 2.188704  | 1.222856  | 0.655818  |
| C | 1.191221  | -0.479293 | -0.744552 |
| C | 3.452098  | 0.659960  | 0.453484  |
| C | 2.451245  | -1.030383 | -0.984708 |
| C | 3.573853  | -0.467403 | -0.367547 |
| H | 4.566409  | -0.884602 | -0.563127 |
| H | 0.321017  | -0.901387 | -1.252104 |
| H | 2.101259  | 2.119330  | 1.274402  |
| C | 2.598578  | -2.121465 | -1.989153 |
| C | 2.795762  | -3.457626 | -1.578414 |
| C | 2.519562  | -1.792654 | -3.363128 |
| C | 2.930055  | -4.450373 | -2.557021 |
| C | 2.643234  | -2.820375 | -4.306161 |
| C | 2.853248  | -4.137604 | -3.910616 |
| H | 3.088397  | -5.489193 | -2.253957 |
| H | 2.570752  | -2.584351 | -5.371549 |
| H | 2.949889  | -4.926087 | -4.661767 |
| C | 4.661803  | 1.263034  | 1.085033  |
| C | 5.260978  | 2.410791  | 0.507200  |
| C | 5.201097  | 0.681981  | 2.254650  |
| C | 6.404363  | 2.943730  | 1.113609  |
| C | 6.343911  | 1.255395  | 2.829415  |
| C | 6.945001  | 2.372835  | 2.263238  |
| H | 6.884502  | 3.824739  | 0.682330  |

|   |           |           |           |
|---|-----------|-----------|-----------|
| H | 6.762525  | 0.822606  | 3.742670  |
| H | 7.836995  | 2.808253  | 2.721501  |
| C | 4.535784  | -0.494364 | 2.949075  |
| H | 3.820185  | -0.946296 | 2.242234  |
| C | 3.740187  | -0.009304 | 4.158624  |
| H | 2.942215  | 0.692543  | 3.871540  |
| H | 3.269601  | -0.848928 | 4.692348  |
| H | 4.390825  | 0.510660  | 4.879747  |
| C | 5.519001  | -1.586421 | 3.349553  |
| H | 6.122788  | -1.932617 | 2.497718  |
| H | 6.216482  | -1.254021 | 4.133667  |
| H | 4.982454  | -2.458521 | 3.753163  |
| C | 4.707858  | 3.029530  | -0.767839 |
| H | 3.605488  | 2.963934  | -0.715106 |
| C | 5.145483  | 2.240855  | -2.001017 |
| H | 4.673431  | 2.642807  | -2.910925 |
| H | 6.237229  | 2.297642  | -2.138653 |
| H | 4.878548  | 1.176603  | -1.933912 |
| C | 5.065885  | 4.498105  | -0.938322 |
| H | 4.550481  | 4.917766  | -1.813880 |
| H | 4.782839  | 5.104653  | -0.065006 |
| H | 6.143244  | 4.645607  | -1.111227 |
| C | 2.257509  | -0.373222 | -3.841705 |
| H | 2.470385  | 0.313608  | -3.004645 |
| C | 2.861183  | -3.831172 | -0.109441 |
| H | 2.423824  | -2.996164 | 0.464112  |
| C | 2.033439  | -5.068253 | 0.208880  |
| H | 0.987744  | -4.948811 | -0.110824 |
| H | 2.431336  | -5.972705 | -0.276190 |
| H | 2.033936  | -5.267704 | 1.290885  |
| C | 4.304458  | -4.006247 | 0.353242  |
| H | 4.794914  | -4.839784 | -0.175234 |
| H | 4.909011  | -3.105858 | 0.169939  |
| H | 4.353627  | -4.227910 | 1.430641  |
| C | 0.788207  | -0.195250 | -4.218948 |
| H | 0.496419  | -0.892252 | -5.020935 |
| H | 0.112475  | -0.380978 | -3.371663 |
| H | 0.589333  | 0.824841  | -4.581302 |
| C | 3.167372  | 0.038730  | -4.992382 |
| H | 4.230802  | -0.109845 | -4.751718 |
| H | 2.955667  | -0.522175 | -5.915623 |
| H | 3.028847  | 1.103737  | -5.231834 |
| H | -0.031517 | 2.204552  | -2.205095 |
| H | 1.127882  | 3.597062  | -3.902845 |
| C | 0.450553  | 3.139461  | -1.907734 |
| C | 1.097278  | 3.925349  | -2.860492 |
| C | 0.405173  | 3.548627  | -0.569657 |
| C | 1.692963  | 5.132465  | -2.490705 |
| H | 2.196953  | 5.748183  | -3.240163 |
| C | 1.014301  | 4.753655  | -0.203184 |
| C | 1.647611  | 5.547090  | -1.159491 |
| H | 0.988795  | 5.071876  | 0.844058  |
| H | 2.118949  | 6.487090  | -0.860951 |
| H | -4.349362 | -2.571895 | 0.705850  |
| H | -3.467694 | -3.871156 | 1.528678  |
| O | -4.414788 | -4.420714 | -0.229959 |
| C | -5.623487 | -4.779873 | 0.366446  |
| H | -6.306538 | -3.915408 | 0.485298  |
| H | -5.486392 | -5.231742 | 1.368717  |
| H | -6.118414 | -5.520532 | -0.275694 |

140

Scheme\_S14\_LXII / electronic energy: -5325.16005931 a.u. / lowest freq: -130.00 cm-1

|   |           |           |           |
|---|-----------|-----------|-----------|
| C | -2.298418 | -2.598753 | -0.454421 |
| H | -2.541890 | -3.011782 | 0.537773  |
| C | -0.768800 | -2.577574 | -0.654659 |
| H | -0.522674 | -2.770896 | -1.715737 |
| C | -1.535659 | -0.364942 | -0.314107 |
| C | -3.939191 | -0.659721 | -0.338746 |
| C | -4.441179 | 0.121413  | -1.385967 |
| C | -4.732328 | -0.902092 | 0.795898  |
| C | -5.735288 | 0.634363  | -1.332078 |
| H | -3.794067 | 0.314306  | -2.246908 |
| C | -6.034559 | -0.397235 | 0.828875  |
| C | -6.541116 | 0.356685  | -0.227713 |
| H | -6.114132 | 1.243629  | -2.156595 |
| H | -6.631893 | -0.575104 | 1.725672  |
| H | -7.561435 | 0.744853  | -0.178644 |
| S | -4.108745 | -1.731516 | 2.289723  |
| O | -4.998731 | -1.245522 | 3.365631  |
| O | -2.700807 | -1.269845 | 2.418865  |
| O | -4.233129 | -3.187422 | 2.022414  |
| C | -3.064225 | -3.363799 | -1.499078 |
| C | -3.858014 | -4.452572 | -1.124464 |

|   |           |           |           |
|---|-----------|-----------|-----------|
| C | -3.003576 | -2.997634 | -2.850984 |
| C | -4.566804 | -5.174743 | -2.086154 |
| H | -3.927301 | -4.714796 | -0.065223 |
| C | -3.714863 | -3.714422 | -3.810268 |
| H | -2.396433 | -2.137240 | -3.151634 |
| C | -4.496033 | -4.808544 | -3.429588 |
| H | -5.183292 | -6.024342 | -1.781850 |
| H | -3.661466 | -3.418897 | -4.861169 |
| H | -5.053816 | -5.371518 | -4.182242 |
| N | -2.615787 | -1.155807 | -0.452099 |
| N | -0.449079 | -1.170222 | -0.340322 |
| C | 0.875407  | -0.717154 | -0.175867 |
| C | 1.886946  | -1.087944 | -1.064786 |
| C | 1.173455  | 0.074520  | 0.933666  |
| C | 3.196468  | -0.637759 | -0.855330 |
| C | 2.472331  | 0.535893  | 1.162104  |
| C | 3.472520  | 0.179470  | 0.247856  |
| H | 4.498101  | 0.524433  | 0.412334  |
| H | 0.377038  | 0.286484  | 1.646622  |
| H | 1.659390  | -1.725400 | -1.923692 |
| C | 2.775046  | 1.325685  | 2.389736  |
| C | 3.181314  | 2.679579  | 2.295873  |
| C | 2.622116  | 0.717314  | 3.660527  |
| C | 3.410343  | 3.401944  | 3.473314  |
| C | 2.852593  | 1.483931  | 4.809806  |
| C | 3.239679  | 2.816924  | 4.723639  |
| H | 3.719200  | 4.449495  | 3.405102  |
| H | 2.731144  | 1.021004  | 5.793763  |
| H | 3.413679  | 3.398983  | 5.632547  |
| C | 4.296730  | -1.037191 | -1.779794 |
| C | 5.100528  | -2.153930 | -1.457646 |
| C | 4.529910  | -0.293251 | -2.960991 |
| C | 6.159583  | -2.487243 | -2.313066 |
| C | 5.595331  | -0.666869 | -3.788573 |
| C | 6.409881  | -1.749081 | -3.465022 |
| H | 6.797567  | -3.342429 | -2.073556 |
| H | 5.792891  | -0.102228 | -4.703269 |
| H | 7.240555  | -2.024052 | -4.120594 |
| C | 3.671895  | 0.912858  | -3.302143 |
| H | 2.667202  | 0.729089  | -2.886336 |
| C | 3.511742  | 1.145043  | -4.796864 |
| H | 3.158406  | 0.245478  | -5.322408 |
| H | 2.782744  | 1.945552  | -4.984915 |
| H | 4.452915  | 1.459597  | -5.273428 |
| C | 4.206190  | 2.167804  | -2.615737 |
| H | 4.316658  | 2.020225  | -1.532161 |
| H | 5.196123  | 2.447726  | -3.011378 |
| H | 3.529042  | 3.023914  | -2.766061 |
| C | 4.855262  | -2.975451 | -0.202295 |
| H | 3.819598  | -2.783841 | 0.129273  |
| C | 5.778827  | -2.534473 | 0.929854  |
| H | 5.583986  | -3.111751 | 1.846487  |
| H | 6.837215  | -2.685453 | 0.663188  |
| H | 5.651249  | -1.470031 | 1.176316  |
| C | 4.979272  | -4.473836 | -0.444864 |
| H | 4.699429  | -5.036257 | 0.457913  |
| H | 4.329691  | -4.813933 | -1.265148 |
| H | 6.009242  | -4.771941 | -0.693789 |
| C | 2.248439  | -0.745656 | 3.838635  |
| H | 2.206044  | -1.217866 | 2.844227  |
| C | 3.363618  | 3.389890  | 0.966809  |
| H | 3.045035  | 2.703521  | 0.169530  |
| C | 2.491823  | 4.635950  | 0.854436  |
| H | 1.431133  | 4.415041  | 1.044286  |
| H | 2.798041  | 5.419554  | 1.565260  |
| H | 2.561620  | 5.069842  | -0.154775 |
| C | 4.829298  | 3.732862  | 0.720147  |
| H | 5.214756  | 4.429828  | 1.481564  |
| H | 5.473233  | 2.840512  | 0.741576  |
| H | 4.963800  | 4.216473  | -0.259516 |
| C | 0.872218  | -0.893735 | 4.477885  |
| H | 0.846574  | -0.446114 | 5.484173  |
| H | 0.085269  | -0.404438 | 3.885706  |
| H | 0.592473  | -1.952066 | 4.587487  |
| C | 3.306540  | -1.500162 | 4.637154  |
| H | 4.308769  | -1.386986 | 4.197703  |
| H | 3.363884  | -1.154669 | 5.681192  |
| H | 3.078522  | -2.576672 | 4.666089  |
| H | -0.717349 | -2.676853 | 2.056917  |
| H | 0.568587  | -4.256751 | 3.496460  |
| C | -0.084450 | -3.450742 | 1.606256  |
| C | 0.628792  | -4.339415 | 2.408060  |
| C | -0.013214 | -3.551382 | 0.209174  |

|    |           |           |           |
|----|-----------|-----------|-----------|
| C  | 1.410644  | -5.341510 | 1.827233  |
| H  | 1.965514  | -6.039355 | 2.459706  |
| C  | 0.770606  | -4.555672 | -0.365997 |
| C  | 1.473806  | -5.453521 | 0.439079  |
| H  | 0.829293  | -4.633396 | -1.456310 |
| H  | 2.078034  | -6.239017 | -0.021650 |
| Cu | -1.584488 | 1.529587  | -0.541891 |
| C  | -1.207379 | 2.805893  | -2.043005 |
| C  | -1.852327 | 3.548124  | -0.899836 |
| C  | 0.205726  | 3.053624  | -2.279496 |
| H  | -1.771610 | 2.856916  | -2.981373 |
| F  | 0.668249  | 2.412241  | -3.382253 |
| F  | 1.019962  | 2.672512  | -1.245855 |
| F  | 0.573954  | 4.374366  | -2.482788 |
| C  | -3.277283 | 3.923248  | -1.246908 |
| H  | -1.284007 | 4.445131  | -0.596688 |
| Si | -2.112835 | 3.101077  | 1.283322  |
| C  | -0.682077 | 2.526227  | 2.372797  |
| H  | 0.278472  | 2.529209  | 1.836392  |
| H  | -0.564560 | 3.188236  | 3.248230  |
| H  | -0.859114 | 1.506368  | 2.745532  |
| C  | -3.734851 | 2.307418  | 1.833228  |
| H  | -4.169254 | 2.841446  | 2.695569  |
| H  | -4.498571 | 2.304612  | 1.039306  |
| H  | -3.571842 | 1.262023  | 2.138789  |
| C  | -2.217755 | 4.951977  | 1.665513  |
| H  | -2.542075 | 5.082376  | 2.711059  |
| H  | -1.227269 | 5.426885  | 1.580299  |
| H  | -2.911056 | 5.530474  | 1.036751  |
| O  | -3.269882 | 4.951484  | -2.210001 |
| H  | -3.869432 | 4.248012  | -0.366892 |
| H  | -3.804088 | 3.028185  | -1.644376 |
| C  | -4.559792 | 5.312768  | -2.605235 |
| H  | -5.170610 | 5.686467  | -1.760488 |
| H  | -5.110867 | 4.467732  | -3.062720 |
| H  | -4.481478 | 6.113788  | -3.352014 |

140

Scheme\_S14\_LXIII / electronic energy: -5325.16294218 a.u. / lowest freq: -120.28 cm-1

|   |           |           |           |
|---|-----------|-----------|-----------|
| C | 2.507214  | 2.401136  | -0.088876 |
| H | 2.766523  | 2.638672  | 0.955056  |
| C | 0.980481  | 2.528947  | -0.285162 |
| H | 0.762883  | 2.913176  | -1.300294 |
| C | 1.574279  | 0.241853  | -0.287417 |
| C | 3.985402  | 0.330902  | -0.165645 |
| C | 4.548329  | -0.274994 | -1.292014 |
| C | 4.653368  | 0.266107  | 1.071833  |
| C | 5.771543  | -0.936039 | -1.207988 |
| H | 4.000832  | -0.229805 | -2.236095 |
| C | 5.880200  | -0.397767 | 1.140065  |
| C | 6.442365  | -0.991872 | 0.011924  |
| H | 6.200605  | -1.402305 | -2.097515 |
| H | 6.375952  | -0.458191 | 2.111177  |
| H | 7.402742  | -1.507483 | 0.090420  |
| S | 3.995628  | 0.965818  | 2.615002  |
| O | 4.738039  | 0.266026  | 3.684304  |
| O | 2.541926  | 0.664229  | 2.586217  |
| O | 4.305267  | 2.417899  | 2.532736  |
| C | 3.334530  | 3.263385  | -1.001831 |
| C | 4.128283  | 4.282807  | -0.466247 |
| C | 3.321937  | 3.068522  | -2.390087 |
| C | 4.886179  | 5.103865  | -1.302838 |
| H | 4.155078  | 4.416848  | 0.618862  |
| C | 4.082357  | 3.883859  | -3.225217 |
| H | 2.714561  | 2.263719  | -2.817954 |
| C | 4.864431  | 4.906754  | -2.682888 |
| H | 5.501860  | 5.897487  | -0.872054 |
| H | 4.067337  | 3.720863  | -4.305883 |
| H | 5.460620  | 5.546437  | -3.338518 |
| N | 2.714612  | 0.956935  | -0.309027 |
| N | 0.549387  | 1.119851  | -0.204237 |
| C | -0.801738 | 0.752582  | -0.068463 |
| C | -1.803365 | 1.496398  | -0.703335 |
| C | -1.143000 | -0.342112 | 0.729663  |
| C | -3.146690 | 1.139470  | -0.548253 |
| C | -2.482036 | -0.703062 | 0.914174  |
| C | -3.470598 | 0.046990  | 0.265851  |
| H | -4.523203 | -0.216855 | 0.403068  |
| H | -0.346953 | -0.909895 | 1.220643  |
| H | -1.537786 | 2.351429  | -1.331619 |
| C | -2.825757 | -1.839238 | 1.812007  |
| C | -3.533060 | -2.965583 | 1.318583  |
| C | -2.402714 | -1.804753 | 3.165674  |
| C | -3.774842 | -4.041375 | 2.180994  |

|    |           |           |           |
|----|-----------|-----------|-----------|
| C  | -2.650757 | -2.915709 | 3.980828  |
| C  | -3.326999 | -4.029713 | 3.497426  |
| H  | -4.314198 | -4.915907 | 1.806053  |
| H  | -2.312553 | -2.900061 | 5.021154  |
| H  | -3.510368 | -4.888488 | 4.148576  |
| C  | -4.227939 | 1.877259  | -1.263552 |
| C  | -4.685679 | 3.125031  | -0.776518 |
| C  | -4.798086 | 1.302227  | -2.424333 |
| C  | -5.718910 | 3.773189  | -1.465358 |
| C  | -5.827215 | 1.988759  | -3.080917 |
| C  | -6.287279 | 3.212257  | -2.605556 |
| H  | -6.090932 | 4.734528  | -1.104010 |
| H  | -6.272942 | 1.560051  | -3.982277 |
| H  | -7.093045 | 3.734989  | -3.127849 |
| C  | -4.260700 | 0.004593  | -3.003949 |
| H  | -3.861977 | -0.593452 | -2.167365 |
| C  | -3.092904 | 0.290124  | -3.946477 |
| H  | -2.277741 | 0.830698  | -3.441072 |
| H  | -2.669388 | -0.640903 | -4.354131 |
| H  | -3.416191 | 0.908095  | -4.799614 |
| C  | -5.316102 | -0.846089 | -3.695044 |
| H  | -6.209419 | -0.989051 | -3.069529 |
| H  | -5.647996 | -0.410641 | -4.650364 |
| H  | -4.911375 | -1.842965 | -3.927783 |
| C  | -4.110049 | 3.726828  | 0.495698  |
| H  | -3.031112 | 3.489137  | 0.513099  |
| C  | -4.728475 | 3.083531  | 1.735652  |
| H  | -4.276294 | 3.486595  | 2.654826  |
| H  | -5.811682 | 3.278688  | 1.785227  |
| H  | -4.588354 | 1.993047  | 1.753604  |
| C  | -4.241084 | 5.240378  | 0.567756  |
| H  | -3.713164 | 5.628578  | 1.450461  |
| H  | -3.820254 | 5.739509  | -0.318230 |
| H  | -5.288854 | 5.563796  | 0.665392  |
| C  | -1.726599 | -0.596659 | 3.796845  |
| H  | -1.748273 | 0.231381  | 3.071155  |
| C  | -4.024151 | -3.078719 | -0.116310 |
| H  | -3.552529 | -2.273993 | -0.702214 |
| C  | -3.619028 | -4.397513 | -0.768066 |
| H  | -2.540500 | -4.592816 | -0.677425 |
| H  | -4.146500 | -5.257254 | -0.326876 |
| H  | -3.868075 | -4.391019 | -1.840531 |
| C  | -5.536297 | -2.892382 | -0.203683 |
| H  | -6.066568 | -3.662659 | 0.379050  |
| H  | -5.863947 | -1.914815 | 0.180690  |
| H  | -5.886813 | -2.975179 | -1.243621 |
| C  | -0.266183 | -0.873311 | 4.137091  |
| H  | -0.171165 | -1.711700 | 4.845918  |
| H  | 0.333465  | -1.126693 | 3.251692  |
| H  | 0.204908  | 0.004533  | 4.604606  |
| C  | -2.489374 | -0.112539 | 5.026611  |
| H  | -3.544447 | 0.099951  | 4.796877  |
| H  | -2.470857 | -0.848662 | 5.845116  |
| H  | -2.044546 | 0.814431  | 5.418966  |
| H  | 0.624283  | 2.032662  | 2.360866  |
| H  | -0.483700 | 3.496799  | 4.046675  |
| C  | 0.207462  | 3.002191  | 2.066362  |
| C  | -0.398029 | 3.830266  | 3.008909  |
| C  | 0.316709  | 3.418419  | 0.731804  |
| C  | -0.880071 | 5.087824  | 2.636269  |
| H  | -1.351308 | 5.737073  | 3.378991  |
| C  | -0.168825 | 4.676284  | 0.363717  |
| C  | -0.756546 | 5.512845  | 1.314020  |
| H  | -0.083956 | 5.001724  | -0.678222 |
| H  | -1.128477 | 6.496603  | 1.016427  |
| Cu | 1.544869  | -1.656010 | -0.402930 |
| C  | 1.842107  | -3.453653 | 0.376362  |
| C  | 1.649116  | -3.612637 | -1.118919 |
| C  | 0.851969  | -4.099671 | 1.225118  |
| H  | 2.854865  | -3.691420 | 0.724874  |
| F  | 1.019716  | -3.845039 | 2.544904  |
| F  | 0.831072  | -5.486590 | 1.159049  |
| F  | -0.435988 | -3.761679 | 0.927248  |
| C  | 2.907183  | -4.009736 | -1.875537 |
| H  | 0.814100  | -4.303708 | -1.336870 |
| Si | 0.659543  | -2.295064 | -2.606354 |
| C  | 0.672490  | -3.622004 | -3.957139 |
| H  | 0.394879  | -4.622643 | -3.589558 |
| H  | -0.075735 | -3.345240 | -4.718880 |
| H  | 1.639625  | -3.706103 | -4.474627 |
| C  | 1.090388  | -0.704388 | -3.549481 |
| H  | 0.526256  | -0.668902 | -4.498760 |
| H  | 0.835120  | 0.203330  | -2.980921 |

|   |           |           |           |
|---|-----------|-----------|-----------|
| H | 2.159366  | -0.659216 | -3.808421 |
| C | -1.147284 | -2.183278 | -2.041350 |
| H | -1.286460 | -2.629310 | -1.047179 |
| H | -1.495990 | -1.140698 | -1.979780 |
| H | -1.814605 | -2.718546 | -2.738581 |
| H | 2.714122  | -4.881949 | -2.532129 |
| H | 3.708839  | -4.316031 | -1.174054 |
| O | 3.367332  | -2.925602 | -2.660609 |
| C | 4.432353  | -3.269741 | -3.497377 |
| H | 4.159745  | -4.076993 | -4.204801 |
| H | 5.318171  | -3.613607 | -2.930823 |
| H | 4.713089  | -2.382008 | -4.080806 |

74

Scheme\_S15\_ts(CuXadd)\_Bpin / electronic energy: -4211.98699480 a.u. / lowest freq: -185.43 cm-1

|    |           |           |           |
|----|-----------|-----------|-----------|
| C  | 0.001788  | -3.866998 | 1.571502  |
| C  | 0.358644  | -3.204978 | 2.892628  |
| C  | 0.911124  | -1.735470 | 1.167842  |
| C  | -0.137774 | -2.774687 | -0.742056 |
| C  | 0.873676  | -2.671075 | -1.706901 |
| C  | -1.481542 | -2.783766 | -1.163851 |
| C  | 0.568559  | -2.608132 | -3.063567 |
| H  | 1.912854  | -2.641737 | -1.368571 |
| C  | -1.777258 | -2.741209 | -2.528895 |
| C  | -0.761445 | -2.657453 | -3.477866 |
| H  | 1.374148  | -2.526412 | -3.797021 |
| H  | -2.824765 | -2.738694 | -2.834858 |
| H  | -1.012859 | -2.616256 | -4.539963 |
| S  | -2.869262 | -2.731755 | -0.013701 |
| O  | -4.024747 | -2.258532 | -0.839638 |
| O  | -2.523302 | -1.682229 | 0.995593  |
| O  | -3.040007 | -4.087881 | 0.534984  |
| Cu | 1.145697  | -0.117060 | 0.211879  |
| N  | 0.231840  | -2.772785 | 0.619790  |
| N  | 1.102533  | -2.020695 | 2.466348  |
| C  | 1.202100  | 1.615866  | -0.818886 |
| C  | -0.185533 | 1.236474  | -0.408669 |
| C  | -0.867717 | 1.907370  | 0.695880  |
| H  | -1.568523 | 1.251292  | 1.242808  |
| H  | -0.167535 | 2.312026  | 1.441295  |
| H  | -0.833030 | 0.855391  | -1.210250 |
| P  | -3.174928 | 2.803325  | -0.101144 |
| O  | -3.692674 | 4.284007  | -0.403104 |
| O  | -3.456536 | 1.753303  | -1.126888 |
| O  | -3.955533 | 2.277249  | 1.232241  |
| O  | -1.683328 | 3.106403  | 0.312347  |
| Na | -4.007456 | -0.122528 | 0.029698  |
| C  | -4.995234 | 4.462537  | -0.967486 |
| H  | -5.193041 | 5.539121  | -0.974522 |
| H  | -5.033485 | 4.080778  | -1.996547 |
| H  | -5.766490 | 3.961715  | -0.364219 |
| C  | -3.893957 | 3.012947  | 2.454676  |
| H  | -4.493565 | 2.468873  | 3.191830  |
| H  | -2.860393 | 3.092341  | 2.820799  |
| H  | -4.311191 | 4.022353  | 2.329605  |
| C  | 1.615610  | -1.080201 | 3.421275  |
| H  | 1.537467  | 2.544415  | -0.327441 |
| C  | 1.410080  | 1.662092  | -2.320983 |
| H  | 0.968048  | -3.844045 | 3.547508  |
| H  | -0.535081 | -2.897469 | 3.465544  |
| H  | 1.176609  | 0.692978  | -2.786886 |
| H  | 2.436078  | 1.921002  | -2.613826 |
| H  | 0.729047  | 2.404150  | -2.767988 |
| H  | 2.280776  | -1.578323 | 4.141214  |
| H  | 0.807407  | -0.588665 | 3.989992  |
| H  | 2.187741  | -0.305989 | 2.892716  |
| H  | -1.033460 | -4.226631 | 1.526182  |
| H  | 0.669480  | -4.712556 | 1.332487  |
| H  | 6.189515  | 0.157040  | -2.468405 |
| H  | 5.491111  | -1.498001 | -0.776937 |
| C  | 6.079394  | 0.995892  | -1.767084 |
| H  | 7.079920  | 1.234512  | -1.377283 |
| H  | 5.717321  | 1.860629  | -2.337543 |
| H  | 6.577347  | -0.678096 | 0.362612  |
| C  | 5.547139  | -0.703387 | -0.019888 |
| O  | 3.804802  | 0.440349  | -1.188742 |
| C  | 5.138236  | 0.620802  | -0.644953 |
| H  | 4.876430  | -0.982865 | 0.806071  |
| H  | 5.939009  | 3.447166  | -0.475932 |
| H  | 4.283704  | 3.195466  | -1.082162 |
| B  | 2.906430  | 0.805943  | -0.203072 |
| C  | 4.905821  | 1.741125  | 0.415715  |
| H  | 6.867503  | 1.760684  | 1.331521  |
| C  | 4.924647  | 3.134481  | -0.190280 |

|   |          |          |          |
|---|----------|----------|----------|
| C | 5.811300 | 1.667714 | 1.624355 |
| H | 5.687578 | 0.725972 | 2.173980 |
| O | 3.539032 | 1.480337 | 0.831325 |
| H | 4.545269 | 3.859556 | 0.543285 |
| H | 5.587636 | 2.489960 | 2.318501 |

74

Scheme\_S15\_pc\_Bpin / electronic energy: -4212.00418535 a.u. / lowest freq: 19.03 cm<sup>-1</sup>

|    |           |           |           |
|----|-----------|-----------|-----------|
| C  | 0.132547  | 2.834983  | 2.276831  |
| C  | 0.211574  | 1.848159  | 3.428089  |
| C  | -0.642540 | 0.734515  | 1.559675  |
| C  | -0.267933 | 2.342965  | -0.202568 |
| C  | -1.473313 | 2.193326  | -0.903438 |
| C  | 0.868576  | 2.801591  | -0.897067 |
| C  | -1.559177 | 2.494972  | -2.258575 |
| H  | -2.345174 | 1.814991  | -0.364847 |
| C  | 0.766512  | 3.123342  | -2.253700 |
| C  | -0.438132 | 2.973622  | -2.936134 |
| H  | -2.509076 | 2.355636  | -2.781318 |
| H  | 1.661962  | 3.464428  | -2.776710 |
| H  | -0.494475 | 3.220348  | -3.998637 |
| S  | 2.496356  | 2.932451  | -0.140677 |
| O  | 3.461389  | 2.844992  | -1.281708 |
| O  | 2.649833  | 1.720651  | 0.726351  |
| O  | 2.536006  | 4.215560  | 0.581969  |
| Cu | -1.258680 | -0.670509 | 0.321214  |
| N  | -0.228933 | 1.955639  | 1.153392  |
| N  | -0.476096 | 0.675717  | 2.885778  |
| C  | -0.603032 | -2.017610 | -1.048503 |
| C  | 0.503185  | -1.319618 | -0.513525 |
| C  | 1.325966  | -1.873033 | 0.580205  |
| H  | 1.819307  | -1.091076 | 1.179436  |
| H  | 0.744213  | -2.512568 | 1.258178  |
| H  | 0.940963  | -0.495809 | -1.094450 |
| P  | 3.756395  | -2.200301 | -0.439247 |
| O  | 4.560487  | -3.564434 | -0.646737 |
| O  | 3.744472  | -1.231634 | -1.575539 |
| O  | 4.463105  | -1.394563 | 0.785237  |
| O  | 2.399962  | -2.801742 | 0.105792  |
| Na | 4.261374  | 0.776711  | -0.657024 |
| C  | 5.835232  | -3.533634 | -1.294410 |
| H  | 6.198337  | -4.565555 | -1.327405 |
| H  | 5.749621  | -3.147841 | -2.319069 |
| H  | 6.553958  | -2.919772 | -0.732255 |
| C  | 4.674201  | -2.016312 | 2.054899  |
| H  | 4.983864  | -1.232016 | 2.753180  |
| H  | 3.753155  | -2.486571 | 2.427285  |
| H  | 5.465169  | -2.776889 | 1.991132  |
| C  | -0.669882 | -0.508646 | 3.672644  |
| H  | -0.804741 | -3.016489 | -0.635635 |
| C  | -1.101144 | -1.781579 | -2.439774 |
| H  | -0.279150 | 2.207747  | 4.343654  |
| H  | 1.251127  | 1.580309  | 3.689117  |
| H  | -0.981346 | -0.730678 | -2.743923 |
| H  | -2.164795 | -2.033917 | -2.550740 |
| H  | -0.544251 | -2.392748 | -3.172101 |
| H  | -1.250251 | -0.288081 | 4.580616  |
| H  | 0.290696  | -0.951583 | 3.985657  |
| H  | -1.222111 | -1.247578 | 3.077207  |
| H  | 1.069849  | 3.371192  | 2.091246  |
| H  | -0.663909 | 3.584510  | 2.420989  |
| H  | -5.913574 | 0.370709  | -2.707006 |
| H  | -5.372330 | 1.872801  | -0.836197 |
| C  | -6.082017 | -0.485324 | -2.037998 |
| H  | -7.167558 | -0.571294 | -1.879264 |
| H  | -5.739459 | -1.386020 | -2.563200 |
| H  | -6.774113 | 1.205562  | 0.023977  |
| C  | -5.694018 | 1.082845  | -0.142025 |
| O  | -3.925718 | -0.284832 | -0.977385 |
| C  | -5.351730 | -0.278214 | -0.728681 |
| H  | -5.177760 | 1.250347  | 0.814456  |
| H  | -6.646643 | -2.915283 | -0.848652 |
| H  | -4.887608 | -2.963821 | -1.127526 |
| B  | -3.278675 | -0.855964 | 0.118795  |
| C  | -5.509643 | -1.439969 | 0.298629  |
| H  | -7.584352 | -1.141984 | 0.854025  |
| C  | -5.664869 | -2.797969 | -0.367569 |
| C  | -6.596416 | -1.229994 | 1.330667  |
| H  | -6.424979 | -0.327706 | 1.931247  |
| O  | -4.220377 | -1.437949 | 0.962919  |
| H  | -5.565548 | -3.591309 | 0.386559  |
| H  | -6.638418 | -2.084360 | 2.021164  |

74

Scheme\_S15\_ts(oa)\_Bpin / electronic energy: -4211.99903517 a.u. / lowest freq: -366.39 cm<sup>-1</sup>

|    |           |           |           |
|----|-----------|-----------|-----------|
| C  | 0.087590  | -2.982415 | -2.151979 |
| C  | 0.074162  | -2.067503 | -3.364998 |
| C  | -0.707420 | -0.864539 | -1.527068 |
| C  | -0.234281 | -2.349561 | 0.313356  |
| C  | -1.426302 | -2.200620 | 1.035464  |
| C  | 0.939207  | -2.711357 | 1.002506  |
| C  | -1.462147 | -2.402314 | 2.411546  |
| H  | -2.328466 | -1.906320 | 0.494307  |
| C  | 0.888444  | -2.933408 | 2.381309  |
| C  | -0.302287 | -2.779096 | 3.087543  |
| H  | -2.402478 | -2.265085 | 2.951554  |
| H  | 1.811348  | -3.198602 | 2.900300  |
| H  | -0.318260 | -2.945233 | 4.166867  |
| S  | 2.544778  | -2.835494 | 0.198995  |
| O  | 3.543584  | -2.700502 | 1.304524  |
| O  | 2.642219  | -1.647574 | -0.707841 |
| O  | 2.583298  | -4.139139 | -0.486084 |
| Cu | -1.263784 | 0.591333  | -0.330342 |
| N  | -0.247978 | -2.046282 | -1.066192 |
| N  | -0.613334 | -0.878136 | -2.858931 |
| C  | -0.783160 | 2.072175  | 0.943536  |
| C  | 0.406809  | 1.355845  | 0.613133  |
| C  | 1.184126  | 1.626548  | -0.549501 |
| H  | 1.803306  | 0.807804  | -0.931259 |
| H  | 0.707170  | 2.209617  | -1.342865 |
| H  | 0.799230  | 0.622974  | 1.330971  |
| P  | 3.759638  | 2.264803  | 0.344690  |
| O  | 4.666485  | 3.588725  | 0.497651  |
| O  | 3.750112  | 1.353478  | 1.536671  |
| O  | 4.514533  | 1.355213  | -0.803412 |
| O  | 2.450428  | 2.835058  | -0.250170 |
| Na | 4.309089  | -0.643934 | 0.624999  |
| C  | 5.962385  | 3.468776  | 1.076623  |
| H  | 6.385560  | 4.477473  | 1.135997  |
| H  | 5.911822  | 3.043746  | 2.089163  |
| H  | 6.623128  | 2.844125  | 0.455731  |
| C  | 4.609845  | 1.825621  | -2.142689 |
| H  | 5.333068  | 1.191041  | -2.667426 |
| H  | 3.640122  | 1.761240  | -2.658425 |
| H  | 4.963493  | 2.866828  | -2.176882 |
| C  | -0.862965 | 0.257313  | -3.701302 |
| H  | -0.964078 | 2.995533  | 0.373941  |
| C  | -1.336422 | 2.060927  | 2.332829  |
| H  | -0.456913 | -2.494904 | -4.227169 |
| H  | 1.089052  | -1.790964 | -3.701483 |
| H  | -1.240954 | 1.071804  | 2.804376  |
| H  | -2.398523 | 2.337670  | 2.360990  |
| H  | -0.796359 | 2.777513  | 2.975768  |
| H  | -1.477948 | -0.024088 | -4.568322 |
| H  | 0.076201  | 0.694810  | -4.079576 |
| H  | -1.400784 | 1.021515  | -3.125227 |
| H  | 1.052145  | -3.473118 | -1.980034 |
| H  | -0.687492 | -3.765101 | -2.206637 |
| H  | -5.941703 | -0.194685 | 2.754901  |
| H  | -5.398599 | -1.819931 | 0.988732  |
| C  | -6.078159 | 0.623669  | 2.033904  |
| H  | -7.158696 | 0.730571  | 1.856502  |
| H  | -5.715225 | 1.545054  | 2.506922  |
| H  | -6.782295 | -1.184223 | 0.076542  |
| C  | -5.701750 | -1.070255 | 0.243842  |
| O  | -3.915398 | 0.313475  | 1.011747  |
| C  | -5.342846 | 0.318312  | 0.747817  |
| H  | -5.181421 | -1.304860 | -0.696182 |
| H  | -6.583055 | 2.984289  | 0.682047  |
| H  | -4.826464 | 3.018356  | 0.975310  |
| B  | -3.264383 | 0.799872  | -0.110601 |
| C  | -5.468594 | 1.416279  | -0.353378 |
| H  | -7.540492 | 1.122491  | -0.912212 |
| C  | -5.599650 | 2.817371  | 0.220064  |
| C  | -6.547007 | 1.161501  | -1.383053 |
| H  | -6.387696 | 0.220517  | -1.924460 |
| O  | -4.169242 | 1.345742  | -1.004496 |
| H  | -5.478715 | 3.556579  | -0.584025 |
| H  | -6.564787 | 1.972194  | -2.124967 |

74

Scheme\_S15\_pa\_Bpin / electronic energy: -4212.03162404 a.u. / lowest freq: -45.91 cm<sup>-1</sup>

|   |           |          |           |
|---|-----------|----------|-----------|
| C | -0.826627 | 2.637093 | 1.838319  |
| C | -0.937941 | 1.659907 | 2.999138  |
| C | -0.975277 | 0.457752 | 1.012143  |
| C | -0.389551 | 2.138266 | -0.633248 |
| C | -1.314781 | 1.905842 | -1.658768 |
| C | 0.852940  | 2.720462 | -0.944116 |
| C | -1.019045 | 2.252756 | -2.974555 |

|    |           |           |           |
|----|-----------|-----------|-----------|
| H  | -2.273845 | 1.445945  | -1.404590 |
| C  | 1.130025  | 3.082809  | -2.264629 |
| C  | 0.201162  | 2.855423  | -3.277054 |
| H  | -1.752137 | 2.061803  | -3.761738 |
| H  | 2.103750  | 3.520725  | -2.492481 |
| H  | 0.438809  | 3.138951  | -4.304570 |
| S  | 2.152910  | 2.975342  | 0.279167  |
| O  | 3.420427  | 2.952803  | -0.510863 |
| O  | 2.098376  | 1.783888  | 1.182063  |
| O  | 1.868560  | 4.261545  | 0.938376  |
| Cu | -1.131938 | -0.965857 | -0.283427 |
| N  | -0.717136 | 1.732009  | 0.681526  |
| N  | -1.182416 | 0.382981  | 2.324187  |
| C  | -1.681885 | -2.507270 | -1.515102 |
| C  | -0.301843 | -2.138994 | -1.766368 |
| C  | 0.687789  | -2.148742 | -0.809455 |
| H  | 1.690401  | -1.759101 | -1.011959 |
| H  | 0.567717  | -2.723760 | 0.117131  |
| H  | -0.095218 | -1.620038 | -2.713522 |
| P  | 4.431878  | -2.099035 | -0.029316 |
| O  | 5.879827  | -2.676645 | -0.550294 |
| O  | 3.886325  | -1.077264 | -1.010390 |
| O  | 4.917914  | -1.080159 | 1.222638  |
| O  | 3.659379  | -3.260625 | 0.499615  |
| Na | 3.978723  | 0.805405  | 0.210485  |
| C  | 6.791225  | -1.784064 | -1.150971 |
| H  | 7.708400  | -2.341373 | -1.383929 |
| H  | 6.397391  | -1.358306 | -2.087770 |
| H  | 7.061154  | -0.949889 | -0.480343 |
| C  | 5.502410  | -1.661406 | 2.369461  |
| H  | 5.531063  | -0.907891 | 3.167207  |
| H  | 4.917578  | -2.525600 | 2.720965  |
| H  | 6.533341  | -1.999033 | 2.171135  |
| C  | -1.387415 | -0.835740 | 3.056477  |
| H  | -1.819233 | -3.315876 | -0.781691 |
| C  | -2.636741 | -2.524984 | -2.671050 |
| H  | -1.760743 | 1.897386  | 3.688577  |
| H  | -0.011493 | 1.590595  | 3.593059  |
| H  | -2.556852 | -1.612876 | -3.279618 |
| H  | -3.682695 | -2.622368 | -2.353333 |
| H  | -2.421238 | -3.379384 | -3.333054 |
| H  | -2.296594 | -0.778623 | 3.672880  |
| H  | -0.534003 | -1.045075 | 3.719985  |
| H  | -1.497871 | -1.664129 | 2.346540  |
| H  | 0.040658  | 3.304350  | 1.907153  |
| H  | -1.728295 | 3.260259  | 1.719246  |
| H  | -6.215055 | 1.131792  | -1.654134 |
| H  | -4.720029 | 2.122382  | 0.053662  |
| C  | -6.310327 | 0.186830  | -1.102219 |
| H  | -7.265594 | 0.214035  | -0.558604 |
| H  | -6.353780 | -0.627699 | -1.835733 |
| H  | -5.871919 | 1.526468  | 1.264270  |
| C  | -4.963255 | 1.269542  | 0.702721  |
| O  | -3.923160 | -0.152545 | -0.913113 |
| C  | -5.158430 | 0.022915  | -0.141145 |
| H  | -4.140660 | 1.146021  | 1.423426  |
| H  | -6.918245 | -2.333458 | -0.108325 |
| H  | -5.416237 | -2.582065 | -1.027636 |
| B  | -3.129304 | -0.974850 | -0.170978 |
| C  | -5.197472 | -1.287343 | 0.711646  |
| H  | -6.844513 | -0.802860 | 2.018234  |
| C  | -5.830360 | -2.456157 | -0.017515 |
| C  | -5.795407 | -1.124305 | 2.088866  |
| H  | -5.252663 | -0.388525 | 2.694663  |
| O  | -3.769697 | -1.598672 | 0.854950  |
| H  | -5.643072 | -3.383242 | 0.540896  |
| H  | -5.778180 | -2.081940 | 2.626715  |

74

Scheme\_S15\_ts(cc)\_Bpin / electronic energy: -4212.03162404 a.u. / lowest freq: -45.91 cm<sup>-1</sup>

|   |           |          |           |
|---|-----------|----------|-----------|
| C | -0.826627 | 2.637093 | 1.838319  |
| C | -0.937941 | 1.659907 | 2.999138  |
| C | -0.975277 | 0.457752 | 1.012143  |
| C | -0.389551 | 2.138266 | -0.633248 |
| C | -1.314781 | 1.905842 | -1.658768 |
| C | 0.852940  | 2.720462 | -0.944116 |
| C | -1.019045 | 2.252756 | -2.974555 |
| H | -2.273845 | 1.445945 | -1.404590 |
| C | 1.130025  | 3.082809 | -2.264629 |
| C | 0.201162  | 2.855423 | -3.277054 |
| H | -1.752137 | 2.061803 | -3.761738 |
| H | 2.103750  | 3.520725 | -2.492481 |
| H | 0.438809  | 3.138951 | -4.304570 |
| S | 2.152910  | 2.975342 | 0.279167  |

|    |           |           |           |
|----|-----------|-----------|-----------|
| O  | 3.420427  | 2.952803  | -0.510863 |
| O  | 2.098376  | 1.783888  | 1.182063  |
| O  | 1.868560  | 4.261545  | 0.938376  |
| Cu | -1.131938 | -0.965857 | -0.283427 |
| N  | -0.717136 | 1.732009  | 0.681526  |
| N  | -1.182416 | 0.382981  | 2.324187  |
| C  | -1.681885 | -2.507270 | -1.515102 |
| C  | -0.301843 | -2.138994 | -1.766368 |
| C  | 0.687789  | -2.148742 | -0.809455 |
| H  | 1.690401  | -1.759101 | -1.011959 |
| H  | 0.567717  | -2.723760 | 0.117131  |
| H  | -0.095218 | -1.620038 | -2.713522 |
| P  | 4.431878  | -2.099035 | -0.029316 |
| O  | 5.879827  | -2.676645 | -0.550294 |
| O  | 3.886325  | -1.077264 | -1.010390 |
| O  | 4.917914  | -1.080159 | 1.222638  |
| O  | 3.659379  | -3.260625 | 0.499615  |
| Na | 3.978723  | 0.805405  | 0.210485  |
| C  | 6.791225  | -1.784064 | -1.150971 |
| H  | 7.708400  | -2.341373 | -1.383929 |
| H  | 6.397391  | -1.358306 | -2.087770 |
| H  | 7.061154  | -0.949889 | -0.480343 |
| C  | 5.502410  | -1.661406 | 2.369461  |
| H  | 5.531063  | -0.907891 | 3.167207  |
| H  | 4.917578  | -2.525600 | 2.720965  |
| H  | 6.533341  | -1.999033 | 2.171135  |
| C  | -1.387415 | -0.835740 | 3.056477  |
| H  | -1.819233 | -3.315876 | -0.781691 |
| C  | -2.636741 | -2.524984 | -2.671050 |
| H  | -1.760743 | 1.897386  | 3.688577  |
| H  | -0.011493 | 1.590595  | 3.593059  |
| H  | -2.556852 | -1.612876 | -3.279618 |
| H  | -3.682695 | -2.622368 | -2.353333 |
| H  | -2.421238 | -3.379384 | -3.333054 |
| H  | -2.296594 | -0.778623 | 3.672880  |
| H  | -0.534003 | -1.045075 | 3.719985  |
| H  | -1.497871 | -1.664129 | 2.346540  |
| H  | 0.040658  | 3.304350  | 1.907153  |
| H  | -1.728295 | 3.260259  | 1.719246  |
| H  | -6.215055 | 1.131792  | -1.654134 |
| H  | -4.720029 | 2.122382  | 0.053662  |
| C  | -6.310327 | 0.186830  | -1.102219 |
| H  | -7.265594 | 0.214035  | -0.558604 |
| H  | -6.353780 | -0.627699 | -1.835733 |
| H  | -5.871919 | 1.526468  | 1.264270  |
| C  | -4.963255 | 1.269542  | 0.702721  |
| O  | -3.923160 | -0.152545 | -0.913113 |
| C  | -5.158430 | 0.022915  | -0.141145 |
| H  | -4.140660 | 1.146021  | 1.423426  |
| H  | -6.918245 | -2.333458 | -0.108325 |
| H  | -5.416237 | -2.582065 | -1.027636 |
| B  | -3.129304 | -0.974850 | -0.170978 |
| C  | -5.197472 | -1.287343 | 0.711646  |
| H  | -6.844513 | -0.802860 | 2.018234  |
| C  | -5.830360 | -2.456157 | -0.017515 |
| C  | -5.795407 | -1.124305 | 2.088866  |
| H  | -5.252663 | -0.388525 | 2.694663  |
| O  | -3.769697 | -1.598672 | 0.854950  |
| H  | -5.643072 | -3.383242 | 0.540896  |
| H  | -5.778180 | -2.081940 | 2.626715  |

74

Scheme\_S15\_prod\_Bpin / electronic energy: -4212.10124845 a.u. / lowest freq: 19.21 cm-1

|    |           |           |           |
|----|-----------|-----------|-----------|
| C  | -0.154194 | 2.525603  | 1.216677  |
| C  | -0.633419 | 1.700439  | 2.397726  |
| C  | -0.329089 | 0.270261  | 0.571536  |
| C  | 0.829113  | 1.710074  | -0.993051 |
| C  | 0.197554  | 1.339321  | -2.188903 |
| C  | 2.131343  | 2.242167  | -1.045366 |
| C  | 0.835560  | 1.493846  | -3.414868 |
| H  | -0.812205 | 0.923547  | -2.131672 |
| C  | 2.756600  | 2.407763  | -2.284639 |
| C  | 2.117478  | 2.040761  | -3.465203 |
| H  | 0.324245  | 1.195448  | -4.332872 |
| H  | 3.773930  | 2.803275  | -2.305647 |
| H  | 2.627226  | 2.171224  | -4.422201 |
| S  | 3.093890  | 2.682953  | 0.416019  |
| O  | 4.514330  | 2.473620  | 0.005680  |
| O  | 2.725199  | 1.688392  | 1.470629  |
| O  | 2.747075  | 4.077708  | 0.741742  |
| Cu | -0.160727 | -1.365392 | -0.546247 |
| N  | 0.152030  | 1.481320  | 0.224233  |
| N  | -0.856988 | 0.383488  | 1.795635  |
| C  | -3.028861 | -2.314018 | -0.482960 |

|    |           |           |           |
|----|-----------|-----------|-----------|
| C  | -1.905372 | -2.126700 | -1.466288 |
| C  | -0.831190 | -2.974394 | -1.626724 |
| H  | -0.209762 | -2.940837 | -2.526072 |
| H  | -0.686313 | -3.840633 | -0.969231 |
| H  | -2.109802 | -1.408407 | -2.273694 |
| P  | 3.126151  | -1.981490 | -0.086526 |
| O  | 3.432538  | -3.580762 | 0.020067  |
| O  | 4.326325  | -1.197326 | -0.546883 |
| O  | 2.992861  | -1.522081 | 1.499978  |
| O  | 1.787530  | -1.895745 | -0.782021 |
| Na | 4.566111  | 0.344950  | 1.074993  |
| C  | 4.674522  | -3.999728 | 0.554094  |
| H  | 4.680990  | -5.096799 | 0.562556  |
| H  | 5.521333  | -3.648301 | -0.055002 |
| H  | 4.818152  | -3.645793 | 1.588580  |
| C  | 1.909915  | -1.979243 | 2.282486  |
| H  | 1.733367  | -1.251745 | 3.086592  |
| H  | 0.989775  | -2.069591 | 1.678510  |
| H  | 2.127026  | -2.960375 | 2.736007  |
| C  | -1.402865 | -0.697162 | 2.566699  |
| H  | -2.646204 | -2.789583 | 0.436918  |
| C  | -4.093969 | -3.254702 | -1.074745 |
| H  | -1.558081 | 2.086323  | 2.852993  |
| H  | 0.123737  | 1.616447  | 3.196911  |
| H  | -4.522234 | -2.845864 | -2.003206 |
| H  | -4.925552 | -3.414644 | -0.371957 |
| H  | -3.669188 | -4.240597 | -1.317523 |
| H  | -2.429853 | -0.475758 | 2.893379  |
| H  | -0.795507 | -0.895794 | 3.464642  |
| H  | -1.424096 | -1.604095 | 1.948325  |
| H  | 0.719162  | 3.146894  | 1.441698  |
| H  | -0.941279 | 3.184446  | 0.812795  |
| H  | -4.985848 | 2.255382  | -2.201569 |
| H  | -2.937962 | 2.427318  | -0.818244 |
| C  | -5.552673 | 1.771328  | -1.394426 |
| H  | -6.162861 | 2.545634  | -0.907814 |
| H  | -6.228033 | 1.039099  | -1.853490 |
| H  | -3.986128 | 3.025836  | 0.485982  |
| C  | -3.546447 | 2.120719  | 0.044239  |
| O  | -3.909234 | 0.036831  | -1.058008 |
| C  | -4.606876 | 1.132651  | -0.403512 |
| H  | -2.876704 | 1.665430  | 0.785786  |
| H  | -7.416204 | 0.597453  | 0.279279  |
| H  | -6.596357 | -0.775396 | -0.501524 |
| B  | -3.753183 | -0.963076 | -0.135031 |
| C  | -5.305641 | 0.407849  | 0.796295  |
| H  | -6.016693 | 2.133984  | 1.884519  |
| C  | -6.654664 | -0.181358 | 0.422137  |
| C  | -5.412983 | 1.231753  | 2.058822  |
| H  | -4.431603 | 1.545925  | 2.436014  |
| O  | -4.414936 | -0.719379 | 1.038471  |
| H  | -7.001130 | -0.845810 | 1.225628  |
| H  | -5.905908 | 0.651649  | 2.851088  |

54

Scheme\_S15\_ts(CuXadd)\_H / electronic energy: -3801.64295456 a.u. / lowest freq: -899.31 cm<sup>-1</sup>

|    |           |           |           |
|----|-----------|-----------|-----------|
| C  | 3.412237  | 0.517507  | -1.896450 |
| C  | 2.877789  | -0.339452 | -3.031687 |
| C  | 2.224502  | -1.311902 | -1.008582 |
| C  | 2.752277  | 0.434079  | 0.573990  |
| C  | 3.327436  | -0.305077 | 1.617233  |
| C  | 2.101181  | 1.645687  | 0.879340  |
| C  | 3.289789  | 0.154430  | 2.929994  |
| H  | 3.810310  | -1.254030 | 1.371926  |
| C  | 2.082328  | 2.106992  | 2.198790  |
| C  | 2.676209  | 1.372320  | 3.221476  |
| H  | 3.747727  | -0.438625 | 3.725081  |
| H  | 1.562315  | 3.041630  | 2.416031  |
| H  | 2.646169  | 1.746283  | 4.247164  |
| S  | 1.188755  | 2.604789  | -0.342775 |
| O  | 0.241540  | 3.440332  | 0.460964  |
| O  | 0.409633  | 1.609806  | -1.145580 |
| O  | 2.171052  | 3.388656  | -1.111100 |
| Cu | 1.136723  | -2.216214 | 0.255486  |
| N  | 2.781693  | -0.107844 | -0.727279 |
| N  | 2.361525  | -1.513647 | -2.330140 |
| C  | -0.339308 | -2.835590 | 1.561056  |
| C  | -0.730068 | -1.629534 | 0.851462  |
| C  | -1.614652 | -1.655084 | -0.315499 |
| H  | -1.384708 | -0.871887 | -1.058356 |
| H  | -1.588215 | -2.619791 | -0.841902 |
| H  | -0.623335 | -0.673240 | 1.380484  |
| P  | -3.590312 | -0.005347 | 0.156828  |
| O  | -5.152687 | -0.280287 | 0.345491  |

|    |           |           |           |
|----|-----------|-----------|-----------|
| O  | -2.931798 | 0.910571  | 1.136728  |
| O  | -3.398811 | 0.747969  | -1.278912 |
| O  | -3.074125 | -1.485812 | -0.013363 |
| Na | -1.624602 | 2.253359  | -0.157882 |
| C  | -6.017923 | 0.811733  | 0.670953  |
| H  | -7.030159 | 0.402291  | 0.746862  |
| H  | -5.738479 | 1.264618  | 1.631609  |
| H  | -6.001153 | 1.580827  | -0.115092 |
| C  | -3.868299 | 0.149783  | -2.488591 |
| H  | -3.819817 | 0.914875  | -3.270514 |
| H  | -3.237471 | -0.702392 | -2.778601 |
| H  | -4.908567 | -0.189797 | -2.384859 |
| C  | 1.713195  | -2.574622 | -3.046171 |
| H  | -0.875373 | -3.742715 | 1.245377  |
| H  | 1.042870  | -3.484710 | 1.254043  |
| C  | -0.154647 | -2.745685 | 3.053119  |
| H  | 3.648939  | -0.618957 | -3.763878 |
| H  | 2.057172  | 0.153406  | -3.583810 |
| H  | 0.469976  | -1.882165 | 3.324735  |
| H  | 0.316152  | -3.643194 | 3.478814  |
| H  | -1.129675 | -2.606099 | 3.546341  |
| H  | 2.400079  | -3.050324 | -3.761735 |
| H  | 0.838475  | -2.207549 | -3.610185 |
| H  | 1.370142  | -3.332843 | -2.330267 |
| H  | 3.144058  | 1.577341  | -1.982649 |
| H  | 4.509598  | 0.450915  | -1.801509 |

54

Scheme\_S15\_pc\_H / electronic energy: -3801.67163517 a.u. / lowest freq: 25.17 cm<sup>-1</sup>

|    |           |           |           |
|----|-----------|-----------|-----------|
| C  | 2.796650  | 0.731149  | -2.158374 |
| C  | 2.243827  | -0.207773 | -3.214974 |
| C  | 2.005179  | -1.225532 | -1.126377 |
| C  | 2.529641  | 0.580947  | 0.383823  |
| C  | 3.219493  | -0.179802 | 1.339986  |
| C  | 1.946070  | 1.800061  | 0.783201  |
| C  | 3.350201  | 0.260430  | 2.652827  |
| H  | 3.648443  | -1.135847 | 1.028951  |
| C  | 2.100101  | 2.242001  | 2.100612  |
| C  | 2.801460  | 1.484273  | 3.034283  |
| H  | 3.890733  | -0.354283 | 3.376438  |
| H  | 1.628827  | 3.182398  | 2.392012  |
| H  | 2.905084  | 1.844078  | 4.060157  |
| S  | 0.902194  | 2.792868  | -0.295571 |
| O  | 0.033627  | 3.585544  | 0.630454  |
| O  | 0.054122  | 1.814530  | -1.049198 |
| O  | 1.789957  | 3.616230  | -1.134166 |
| Cu | 1.416612  | -2.445762 | 0.319173  |
| N  | 2.391054  | 0.052673  | -0.915160 |
| N  | 1.985603  | -1.426778 | -2.446669 |
| C  | -0.130676 | -2.758905 | 1.640184  |
| C  | -0.383660 | -1.629035 | 0.852322  |
| C  | -1.239358 | -1.688847 | -0.360359 |
| H  | -0.993844 | -0.895167 | -1.084790 |
| H  | -1.160609 | -2.657629 | -0.871859 |
| H  | -0.195132 | -0.630738 | 1.272622  |
| P  | -3.341284 | -0.182404 | 0.243716  |
| O  | -4.852466 | -0.663150 | 0.413066  |
| O  | -2.769593 | 0.702731  | 1.300429  |
| O  | -3.252483 | 0.695796  | -1.122082 |
| O  | -2.682598 | -1.592552 | -0.050479 |
| Na | -1.882877 | 2.432317  | 0.098585  |
| C  | -5.835401 | 0.257443  | 0.898302  |
| H  | -6.778348 | -0.294145 | 0.963388  |
| H  | -5.566100 | 0.633502  | 1.894113  |
| H  | -5.962929 | 1.104300  | 0.208487  |
| C  | -3.741667 | 0.193096  | -2.368205 |
| H  | -3.376050 | 0.862727  | -3.153459 |
| H  | -3.370754 | -0.823102 | -2.560713 |
| H  | -4.840438 | 0.186448  | -2.379845 |
| C  | 1.478735  | -2.614613 | -3.074185 |
| H  | -0.589574 | -3.706884 | 1.326729  |
| H  | 2.375747  | -3.702739 | 0.640332  |
| C  | 0.305930  | -2.675307 | 3.066198  |
| H  | 2.945044  | -0.398369 | -4.039376 |
| H  | 1.299129  | 0.157380  | -3.656373 |
| H  | 0.838170  | -1.736048 | 3.275988  |
| H  | 0.966106  | -3.506522 | 3.349730  |
| H  | -0.560196 | -2.712572 | 3.749669  |
| H  | 2.163565  | -2.968517 | -3.858478 |
| H  | 0.494302  | -2.438657 | -3.539441 |
| H  | 1.377657  | -3.403132 | -2.317386 |
| H  | 2.397507  | 1.748783  | -2.222162 |
| H  | 3.897438  | 0.794730  | -2.188757 |

54

Scheme\_S15\_ts(oa)\_H / electronic energy: -3801.66029997 a.u. / lowest freq: -291.37 cm-1

|    |           |           |           |
|----|-----------|-----------|-----------|
| C  | 2.851381  | 1.185682  | -1.966314 |
| C  | 2.490193  | 0.294690  | -3.141558 |
| C  | 2.162475  | -0.908967 | -1.173743 |
| C  | 2.409991  | 0.792182  | 0.525951  |
| C  | 3.143414  | 0.045790  | 1.460360  |
| C  | 1.654153  | 1.892436  | 0.977351  |
| C  | 3.137898  | 0.380603  | 2.810770  |
| H  | 3.715704  | -0.813784 | 1.100858  |
| C  | 1.671548  | 2.230793  | 2.333158  |
| C  | 2.408331  | 1.484578  | 3.249171  |
| H  | 3.714551  | -0.219057 | 3.518734  |
| H  | 1.068794  | 3.078145  | 2.664674  |
| H  | 2.402499  | 1.761709  | 4.305431  |
| S  | 0.589469  | 2.867581  | -0.099483 |
| O  | -0.401098 | 3.511209  | 0.816722  |
| O  | -0.111762 | 1.880035  | -0.980625 |
| O  | 1.454083  | 3.824406  | -0.811297 |
| Cu | 1.640975  | -2.326765 | 0.105416  |
| N  | 2.409466  | 0.368539  | -0.821038 |
| N  | 2.271315  | -1.002719 | -2.498424 |
| C  | 0.262449  | -3.202602 | 1.332698  |
| C  | -0.187441 | -1.914312 | 0.967574  |
| C  | -0.755145 | -1.627294 | -0.299849 |
| H  | -0.720476 | -0.595986 | -0.663758 |
| H  | -0.719826 | -2.393774 | -1.077521 |
| H  | -0.110568 | -1.093232 | 1.691922  |
| P  | -3.357847 | -0.470733 | 0.191979  |
| O  | -4.895560 | -0.935421 | 0.373836  |
| O  | -2.842568 | 0.432280  | 1.277248  |
| O  | -3.384342 | 0.532240  | -1.122601 |
| O  | -2.645989 | -1.780043 | -0.184587 |
| Na | -2.184498 | 2.250773  | 0.099494  |
| C  | -5.878204 | 0.046948  | 0.675348  |
| H  | -6.824546 | -0.478788 | 0.845805  |
| H  | -5.620017 | 0.613385  | 1.582169  |
| H  | -6.014022 | 0.750485  | -0.161005 |
| C  | -3.641515 | 0.000530  | -2.414285 |
| H  | -3.775440 | 0.843472  | -3.102180 |
| H  | -2.801083 | -0.615939 | -2.767393 |
| H  | -4.557615 | -0.609644 | -2.424488 |
| C  | 1.930905  | -2.172502 | -3.258951 |
| H  | -0.058886 | -4.038624 | 0.696068  |
| H  | 2.756409  | -3.434824 | 0.258231  |
| C  | 0.651948  | -3.545941 | 2.729254  |
| H  | 3.282527  | 0.230984  | -3.900271 |
| H  | 1.563802  | 0.613365  | -3.650893 |
| H  | 1.093026  | -2.688538 | 3.256798  |
| H  | 1.370108  | -4.374892 | 2.765763  |
| H  | -0.230573 | -3.863365 | 3.310387  |
| H  | 2.712384  | -2.401729 | -3.997463 |
| H  | 0.980106  | -2.038561 | -3.800673 |
| H  | 1.833295  | -3.025215 | -2.575189 |
| H  | 2.357544  | 2.162578  | -1.985091 |
| H  | 3.937855  | 1.355133  | -1.885318 |

54

Scheme\_S15\_pa\_H / electronic energy: -3801.67476642 a.u. / lowest freq: 12.08 cm-1

|    |           |           |           |
|----|-----------|-----------|-----------|
| C  | 2.888305  | 1.480098  | -1.903729 |
| C  | 2.542248  | 0.674519  | -3.147449 |
| C  | 2.228850  | -0.668881 | -1.286696 |
| C  | 2.448023  | 0.877377  | 0.556919  |
| C  | 3.233471  | 0.117675  | 1.433787  |
| C  | 1.602048  | 1.872464  | 1.081404  |
| C  | 3.189595  | 0.337600  | 2.807571  |
| H  | 3.883157  | -0.653946 | 1.013013  |
| C  | 1.578887  | 2.096685  | 2.460243  |
| C  | 2.366743  | 1.337826  | 3.322638  |
| H  | 3.808922  | -0.268147 | 3.472869  |
| H  | 0.905784  | 2.861632  | 2.851830  |
| H  | 2.328836  | 1.524536  | 4.397861  |
| S  | 0.481144  | 2.844456  | 0.058792  |
| O  | -0.586997 | 3.303975  | 0.995892  |
| O  | -0.093355 | 1.879184  | -0.930296 |
| O  | 1.278725  | 3.931805  | -0.532946 |
| Cu | 1.720463  | -2.121768 | -0.093606 |
| N  | 2.485895  | 0.562384  | -0.822164 |
| N  | 2.319139  | -0.671585 | -2.609648 |
| C  | 0.696165  | -3.429156 | 1.148740  |
| C  | 0.120150  | -2.136796 | 1.226144  |
| C  | -0.275995 | -1.464943 | 0.071388  |
| H  | -0.517426 | -0.400671 | 0.091635  |
| H  | -0.591594 | -2.019771 | -0.818841 |
| H  | 0.255463  | -1.560639 | 2.151399  |

|    |           |           |           |
|----|-----------|-----------|-----------|
| P  | -3.639068 | -0.723485 | 0.201396  |
| O  | -5.281331 | -0.699805 | 0.270546  |
| O  | -3.048668 | 0.116346  | 1.316714  |
| O  | -3.351027 | 0.288688  | -1.114853 |
| O  | -3.242986 | -2.127746 | -0.119015 |
| Na | -2.197668 | 1.848029  | 0.175085  |
| C  | -5.934925 | 0.511234  | 0.576169  |
| H  | -7.015479 | 0.317090  | 0.600896  |
| H  | -5.631763 | 0.909283  | 1.557807  |
| H  | -5.747794 | 1.287912  | -0.186017 |
| C  | -3.699865 | -0.161695 | -2.405094 |
| H  | -3.443567 | 0.624427  | -3.127452 |
| H  | -3.155485 | -1.080503 | -2.676138 |
| H  | -4.780519 | -0.367043 | -2.485733 |
| C  | 1.991705  | -1.786188 | -3.455256 |
| H  | 0.376609  | -4.057915 | 0.304604  |
| H  | 2.936837  | -3.045284 | -0.035370 |
| C  | 1.252498  | -4.134164 | 2.331717  |
| H  | 3.345250  | 0.665609  | -3.897196 |
| H  | 1.621620  | 1.024966  | -3.643347 |
| H  | 1.710028  | -3.440586 | 3.049760  |
| H  | 1.996815  | -4.887875 | 2.049015  |
| H  | 0.444819  | -4.667210 | 2.859861  |
| H  | 2.789625  | -1.967210 | -4.188991 |
| H  | 1.054128  | -1.607212 | -4.004585 |
| H  | 1.873848  | -2.682637 | -2.834586 |
| H  | 2.355222  | 2.435068  | -1.835026 |
| H  | 3.967746  | 1.682956  | -1.816888 |

54

Scheme\_S15\_ts(cc)\_H / electronic energy: -3801.67381837 a.u. / lowest freq: -291.80 cm<sup>-1</sup>

|    |           |           |           |
|----|-----------|-----------|-----------|
| C  | 3.007902  | -1.478417 | 1.900834  |
| C  | 2.523397  | -0.782625 | 3.165704  |
| C  | 2.126443  | 0.616927  | 1.354722  |
| C  | 2.572615  | -0.804775 | -0.540151 |
| C  | 3.348417  | 0.003420  | -1.380458 |
| C  | 1.744606  | -1.791765 | -1.105160 |
| C  | 3.321250  | -0.171660 | -2.761586 |
| H  | 3.978295  | 0.772688  | -0.926227 |
| C  | 1.734819  | -1.968483 | -2.490778 |
| C  | 2.520047  | -1.167975 | -3.317618 |
| H  | 3.934118  | 0.467185  | -3.401406 |
| H  | 1.075257  | -2.727595 | -2.915759 |
| H  | 2.495351  | -1.317920 | -4.399015 |
| S  | 0.622565  | -2.803328 | -0.120133 |
| O  | -0.441772 | -3.229156 | -1.076928 |
| O  | 0.041018  | -1.878644 | 0.902491  |
| O  | 1.423119  | -3.909591 | 0.431823  |
| Cu | 1.494233  | 2.047557  | 0.198770  |
| N  | 2.580571  | -0.539365 | 0.849951  |
| N  | 2.142401  | 0.547516  | 2.680953  |
| C  | 0.773694  | 3.587962  | -0.935729 |
| C  | 0.172169  | 2.353618  | -1.362291 |
| C  | -0.497571 | 1.518282  | -0.490190 |
| H  | -0.820080 | 0.528323  | -0.818981 |
| H  | -0.922353 | 1.891419  | 0.447880  |
| H  | 0.471655  | 1.954240  | -2.340426 |
| P  | -3.827670 | 0.541530  | -0.407513 |
| O  | -5.422875 | 0.377217  | -0.046970 |
| O  | -3.394365 | -0.515784 | -1.403469 |
| O  | -3.105752 | -0.061812 | 0.990071  |
| O  | -3.563659 | 2.005430  | -0.543617 |
| Na | -2.064642 | -1.827588 | -0.161042 |
| C  | -5.965923 | -0.920002 | 0.054926  |
| H  | -7.038839 | -0.824218 | 0.268178  |
| H  | -5.846656 | -1.491771 | -0.879078 |
| H  | -5.507131 | -1.499216 | 0.875481  |
| C  | -3.242106 | 0.657887  | 2.194729  |
| H  | -2.389186 | 0.421615  | 2.847193  |
| H  | -3.254257 | 1.743888  | 2.010945  |
| H  | -4.170200 | 0.387251  | 2.725799  |
| C  | 1.636344  | 1.556206  | 3.569491  |
| H  | 0.252329  | 4.116922  | -0.125785 |
| H  | 2.403191  | 3.270574  | 0.257671  |
| C  | 1.501950  | 4.444921  | -1.915471 |
| H  | 3.297838  | -0.705004 | 3.941790  |
| H  | 1.644685  | -1.272205 | 3.617346  |
| H  | 2.153145  | 3.852214  | -2.572194 |
| H  | 2.111437  | 5.213025  | -1.425858 |
| H  | 0.775327  | 4.964166  | -2.560431 |
| H  | 2.381644  | 1.817014  | 4.334524  |
| H  | 0.726060  | 1.210720  | 4.083952  |
| H  | 1.395450  | 2.456325  | 2.991073  |
| H  | 2.566521  | -2.470667 | 1.748877  |

H 4.103884 -1.583829 1.867032

54

Scheme\_S15\_prod\_H / electronic energy: -3801.73523435 a.u. / lowest freq: 15.68 cm<sup>-1</sup>

C 3.224078 0.348559 2.050987  
 C 2.336512 0.696364 3.239519  
 C 1.290583 1.449238 1.293652  
 C 2.724163 0.569267 -0.443552  
 C 2.999243 1.663542 -1.273005  
 C 2.707757 -0.724850 -0.991981  
 C 3.272413 1.481412 -2.625448  
 H 3.003121 2.662868 -0.830987  
 C 2.991808 -0.898302 -2.349765  
 C 3.277106 0.194716 -3.163785  
 H 3.488775 2.345915 -3.256909  
 H 2.959324 -1.906906 -2.766608  
 H 3.494145 0.040229 -4.222881  
 S 2.288893 -2.195998 -0.034947  
 O 1.679475 -3.123544 -1.035315  
 O 1.250511 -1.767368 0.950431  
 O 3.546986 -2.672939 0.562869  
 Cu -0.043359 1.940105 -0.050580  
 N 2.414606 0.816850 0.915763  
 N 1.239715 1.449334 2.624114  
 C -2.705232 3.266246 -0.392734  
 C -1.464944 3.037439 -1.198498  
 C -1.154273 1.849901 -1.803605  
 H -0.336200 1.784081 -2.530488  
 H -1.838518 0.993640 -1.712090  
 H -0.861850 3.928869 -1.429699  
 P -3.193609 -1.427985 -0.512335  
 O -4.454372 -2.011691 0.361931  
 O -2.529249 -2.535926 -1.302449  
 O -2.038327 -1.184171 0.681008  
 O -3.642359 -0.118644 -1.082359  
 Na -0.518875 -2.704609 -0.305954  
 C -4.330919 -3.276584 0.974450  
 H -5.280188 -3.502991 1.477577  
 H -4.127489 -4.073110 0.241302  
 H -3.531131 -3.290407 1.735068  
 C -2.193731 -0.129450 1.598047  
 H -1.955010 0.849849 1.139580  
 H -3.219801 -0.077208 1.999396  
 H -1.502537 -0.296924 2.436064  
 C 0.187421 2.014157 3.420356  
 H -3.213152 2.301065 -0.234870  
 H -2.432405 3.654576 0.604988  
 C -3.645853 4.253284 -1.065213  
 H 2.846708 1.305953 3.999679  
 H 1.927964 -0.193488 3.746215  
 H -3.168504 5.232079 -1.221635  
 H -4.544451 4.418367 -0.455338  
 H -3.975529 3.885811 -2.047678  
 H 0.569730 2.808323 4.079854  
 H -0.284452 1.248794 4.055090  
 H -0.573795 2.445245 2.758538  
 H 3.437972 -0.724956 1.965683  
 H 4.185786 0.885074 2.062012

66

Scheme\_S15\_ts(CuXadd)\_SiMe3 / electronic energy: -4210.12384995 a.u. / lowest freq: -159.19 cm<sup>-1</sup>

C 3.209116 2.843197 -0.744845  
 C 3.626341 2.241067 -2.073194  
 C 2.531746 0.593305 -0.835060  
 C 1.673472 1.871578 1.029909  
 C 2.268472 1.251253 2.134317  
 C 0.432989 2.513546 1.189068  
 C 1.658010 1.282187 3.386240  
 H 3.224918 0.740478 1.991730  
 C -0.168989 2.548947 2.448650  
 C 0.439917 1.940414 3.544792  
 H 2.136588 0.792128 4.237327  
 H -1.132196 3.051081 2.553955  
 H -0.045943 1.974762 4.522486  
 S -0.463320 3.210610 -0.211477  
 O -1.731150 3.746815 0.379887  
 O -0.797473 2.053762 -1.099584  
 O 0.406563 4.227913 -0.821702  
 Cu 1.471639 -0.869567 -0.226231  
 N 2.321980 1.793339 -0.228104  
 N 3.366959 0.816000 -1.864213  
 C 0.419834 -2.374693 0.851067  
 C -0.407584 -1.306255 0.188730  
 C -1.346147 -1.623162 -0.882543  
 H -1.547781 -0.767619 -1.549703

|    |           |           |           |
|----|-----------|-----------|-----------|
| H  | -1.012491 | -2.458606 | -1.515566 |
| H  | -0.754668 | -0.515527 | 0.870316  |
| P  | -3.758478 | -0.963547 | -0.092908 |
| O  | -5.032172 | -1.879740 | 0.221451  |
| O  | -3.437116 | 0.117960  | 0.887752  |
| O  | -4.081732 | -0.156445 | -1.476924 |
| O  | -2.700683 | -2.080580 | -0.428669 |
| Na | -3.004323 | 1.965981  | -0.390102 |
| C  | -6.218067 | -1.269413 | 0.735139  |
| H  | -6.991606 | -2.043980 | 0.754357  |
| H  | -6.059054 | -0.892011 | 1.754331  |
| H  | -6.557890 | -0.443840 | 0.092513  |
| C  | -4.465978 | -0.858780 | -2.658811 |
| H  | -4.455993 | -0.138605 | -3.483714 |
| H  | -3.764779 | -1.674531 | -2.885308 |
| H  | -5.479274 | -1.273053 | -2.555732 |
| C  | 3.687723  | -0.146113 | -2.878369 |
| H  | 0.114058  | -3.371396 | 0.480167  |
| C  | 0.397160  | -2.326045 | 2.365496  |
| H  | 4.680709  | 2.420592  | -2.325885 |
| H  | 3.010743  | 2.612922  | -2.912659 |
| H  | 0.713665  | -1.335843 | 2.728514  |
| H  | 1.049134  | -3.070744 | 2.846884  |
| H  | -0.627174 | -2.484650 | 2.744255  |
| H  | 4.759331  | -0.112025 | -3.123794 |
| H  | 3.121220  | 0.032958  | -3.807965 |
| H  | 3.444271  | -1.151083 | -2.514070 |
| H  | 2.677363  | 3.796925  | -0.837523 |
| H  | 4.065989  | 2.978526  | -0.060082 |
| H  | 1.676316  | -2.585858 | -2.136691 |
| H  | 4.517053  | -1.704658 | -0.153096 |
| C  | 2.112745  | -3.442489 | -1.592679 |
| H  | 3.040515  | -3.727205 | -2.114347 |
| H  | 1.404987  | -4.279915 | -1.705551 |
| H  | 4.892778  | -3.337983 | 0.461107  |
| C  | 4.190818  | -2.489036 | 0.545977  |
| Si | 2.402719  | -3.061896 | 0.241358  |
| H  | 4.309256  | -2.082860 | 1.563751  |
| C  | 2.334439  | -4.702221 | 1.176112  |
| H  | 2.987809  | -5.431827 | 0.669347  |
| H  | 1.327587  | -5.145239 | 1.221072  |
| H  | 2.708229  | -4.616239 | 2.208170  |

66

Scheme\_S15\_pc\_SiMe3 / electronic energy: -4210.15887996 a.u. / lowest freq: 16.39 cm-1

|    |           |           |           |
|----|-----------|-----------|-----------|
| C  | -0.982660 | 2.890904  | 1.940365  |
| C  | -1.122408 | 1.996469  | 3.158250  |
| C  | -1.563304 | 0.721332  | 1.251300  |
| C  | -0.871916 | 2.210872  | -0.523118 |
| C  | -1.903920 | 1.929277  | -1.430610 |
| C  | 0.347926  | 2.711188  | -1.021136 |
| C  | -1.744398 | 2.144703  | -2.795398 |
| H  | -2.841696 | 1.529782  | -1.035156 |
| C  | 0.491369  | 2.942396  | -2.392251 |
| C  | -0.545185 | 2.665628  | -3.279740 |
| H  | -2.565385 | 1.912370  | -3.478178 |
| H  | 1.449059  | 3.317041  | -2.757871 |
| H  | -0.409505 | 2.847694  | -4.347933 |
| S  | 1.797058  | 2.987107  | 0.011159  |
| O  | 2.956166  | 2.949860  | -0.934645 |
| O  | 1.871810  | 1.808003  | 0.931931  |
| O  | 1.617758  | 4.286012  | 0.682220  |
| Cu | -1.936226 | -0.815369 | 0.074056  |
| N  | -1.080297 | 1.916034  | 0.839933  |
| N  | -1.674406 | 0.769471  | 2.583300  |
| C  | -1.081226 | -2.208702 | -1.139198 |
| C  | -0.069658 | -1.384627 | -0.603830 |
| C  | 0.704317  | -1.762025 | 0.597663  |
| H  | 1.096409  | -0.885951 | 1.139294  |
| H  | 0.118161  | -2.369011 | 1.301702  |
| H  | 0.353206  | -0.586441 | -1.229460 |
| P  | 3.223479  | -1.993701 | -0.178469 |
| O  | 4.071079  | -3.325119 | -0.418196 |
| O  | 3.225358  | -0.964565 | -1.259462 |
| O  | 3.872591  | -1.234828 | 1.108924  |
| O  | 1.863890  | -2.652353 | 0.286696  |
| Na | 3.767453  | 0.954016  | -0.153736 |
| C  | 5.382514  | -3.223964 | -0.981901 |
| H  | 5.783476  | -4.240882 | -1.034389 |
| H  | 5.344570  | -2.798359 | -1.993488 |
| H  | 6.041403  | -2.611132 | -0.349530 |
| C  | 3.982773  | -1.890753 | 2.375048  |
| H  | 4.614305  | -1.262809 | 3.011762  |
| H  | 2.996052  | -2.003438 | 2.845306  |

|    |           |           |           |
|----|-----------|-----------|-----------|
| H  | 4.450149  | -2.879615 | 2.268330  |
| C  | -1.997030 | -0.362758 | 3.404779  |
| H  | -1.247265 | -3.180581 | -0.651895 |
| C  | -1.504635 | -2.122696 | -2.571917 |
| H  | -1.789162 | 2.409453  | 3.928156  |
| H  | -0.152339 | 1.776403  | 3.639118  |
| H  | -1.423970 | -1.097055 | -2.962680 |
| H  | -2.540597 | -2.457203 | -2.724699 |
| H  | -0.868902 | -2.758415 | -3.213319 |
| H  | -2.774119 | -0.109541 | 4.141327  |
| H  | -1.113432 | -0.727447 | 3.954959  |
| H  | -2.369988 | -1.171674 | 2.762220  |
| H  | -0.042282 | 3.451077  | 1.909704  |
| H  | -1.811220 | 3.614111  | 1.855389  |
| H  | -4.155389 | -3.918331 | 0.355222  |
| H  | -5.045670 | -1.627628 | 2.253189  |
| C  | -4.550237 | -3.277514 | -0.451097 |
| H  | -5.632476 | -3.485890 | -0.522861 |
| H  | -4.093551 | -3.637579 | -1.387797 |
| H  | -6.370042 | -1.195548 | 1.162174  |
| C  | -5.300400 | -1.015169 | 1.372078  |
| Si | -4.194169 | -1.428063 | -0.132979 |
| H  | -5.206586 | 0.039119  | 1.683085  |
| C  | -5.053234 | -0.527814 | -1.586796 |
| H  | -6.068856 | -0.921968 | -1.770086 |
| H  | -4.496763 | -0.621304 | -2.534615 |
| H  | -5.164182 | 0.551858  | -1.390623 |

66

Scheme\_S15\_ts(oa)\_SiMe3 / electronic energy: -4210.15329254 a.u. / lowest freq: -364.65 cm<sup>-1</sup>

|    |           |           |           |
|----|-----------|-----------|-----------|
| C  | -1.360213 | -2.855539 | -1.948388 |
| C  | -1.392238 | -1.962735 | -3.177611 |
| C  | -1.648003 | -0.622496 | -1.287385 |
| C  | -1.186045 | -2.160499 | 0.514102  |
| C  | -2.236044 | -1.843860 | 1.385909  |
| C  | 0.007476  | -2.685089 | 1.045769  |
| C  | -2.115051 | -2.041002 | 2.758413  |
| H  | -3.155115 | -1.435972 | 0.957373  |
| C  | 0.112483  | -2.899885 | 2.422234  |
| C  | -0.939377 | -2.580584 | 3.278134  |
| H  | -2.945729 | -1.781031 | 3.419028  |
| H  | 1.049631  | -3.295719 | 2.817278  |
| H  | -0.834040 | -2.747056 | 4.352320  |
| S  | 1.460881  | -3.011178 | 0.034168  |
| O  | 2.595412  | -3.102137 | 1.004989  |
| O  | 1.635401  | -1.797317 | -0.825210 |
| O  | 1.206808  | -4.260654 | -0.703242 |
| Cu | -1.786984 | 0.933656  | -0.096039 |
| N  | -1.343135 | -1.864094 | -0.858781 |
| N  | -1.765547 | -0.662913 | -2.616835 |
| C  | -0.982847 | 2.345917  | 1.084547  |
| C  | 0.054423  | 1.443965  | 0.697076  |
| C  | 0.787910  | 1.567376  | -0.516205 |
| H  | 1.259999  | 0.659024  | -0.905732 |
| H  | 0.362264  | 2.203665  | -1.297825 |
| H  | 0.382252  | 0.677929  | 1.412717  |
| P  | 3.491316  | 1.814447  | 0.179983  |
| O  | 4.591494  | 2.986676  | 0.302048  |
| O  | 3.420198  | 0.873758  | 1.347105  |
| O  | 4.032385  | 0.842182  | -1.036713 |
| O  | 2.245363  | 2.585709  | -0.313182 |
| Na | 3.599836  | -1.151653 | 0.342566  |
| C  | 5.900976  | 2.656171  | 0.754320  |
| H  | 6.486257  | 3.582337  | 0.754767  |
| H  | 5.881161  | 2.246332  | 1.774256  |
| H  | 6.388069  | 1.931387  | 0.083916  |
| C  | 4.128781  | 1.343699  | -2.364676 |
| H  | 4.664101  | 0.598143  | -2.963483 |
| H  | 3.133239  | 1.504877  | -2.804252 |
| H  | 4.689135  | 2.290134  | -2.395110 |
| C  | -1.922740 | 0.495490  | -3.450081 |
| H  | -1.059716 | 3.277992  | 0.504966  |
| C  | -1.428169 | 2.440634  | 2.509017  |
| H  | -2.117607 | -2.290588 | -3.935311 |
| H  | -0.407580 | -1.881282 | -3.670913 |
| H  | -1.428740 | 1.458222  | 3.004731  |
| H  | -2.436551 | 2.866945  | 2.606990  |
| H  | -0.752437 | 3.091118  | 3.091290  |
| H  | -2.720744 | 0.343875  | -4.191635 |
| H  | -0.992910 | 0.730000  | -3.994537 |
| H  | -2.186031 | 1.355948  | -2.820435 |
| H  | -0.486522 | -3.515651 | -1.903613 |
| H  | -2.265922 | -3.477989 | -1.856708 |
| H  | -3.826413 | 4.040904  | -0.746980 |

|    |           |           |           |
|----|-----------|-----------|-----------|
| H  | -4.838109 | 1.513024  | -2.246338 |
| C  | -4.219072 | 3.566821  | 0.167488  |
| H  | -5.285835 | 3.841841  | 0.236655  |
| H  | -3.708058 | 4.046114  | 1.017703  |
| H  | -6.174890 | 1.365428  | -1.093742 |
| C  | -5.122917 | 1.081504  | -1.273165 |
| Si | -3.993751 | 1.680471  | 0.138028  |
| H  | -5.102011 | -0.014574 | -1.390304 |
| C  | -4.811769 | 1.021743  | 1.725768  |
| H  | -5.797511 | 1.492709  | 1.885412  |
| H  | -4.214763 | 1.208234  | 2.632611  |
| H  | -4.986960 | -0.065108 | 1.674346  |

66

Scheme\_S15\_pa\_SiMe3 / electronic energy: -4210.18056310 a.u. / lowest freq: 15.36 cm-1

|    |           |           |           |
|----|-----------|-----------|-----------|
| C  | -1.374028 | -2.532161 | -2.153320 |
| C  | -1.211956 | -1.523985 | -3.284176 |
| C  | -1.515067 | -0.361284 | -1.296389 |
| C  | -1.382984 | -2.091096 | 0.378896  |
| C  | -2.486535 | -1.838025 | 1.201773  |
| C  | -0.232002 | -2.679438 | 0.932399  |
| C  | -2.454349 | -2.147775 | 2.558596  |
| H  | -3.377171 | -1.394758 | 0.749241  |
| C  | -0.214724 | -3.004627 | 2.291096  |
| C  | -1.314633 | -2.737529 | 3.103773  |
| H  | -3.324774 | -1.936653 | 3.184326  |
| H  | 0.690552  | -3.447997 | 2.710376  |
| H  | -1.277053 | -2.989114 | 4.165778  |
| S  | 1.248302  | -3.022901 | -0.036318 |
| O  | 2.356633  | -3.067708 | 0.964116  |
| O  | 1.431737  | -1.846512 | -0.940945 |
| O  | 0.997015  | -4.299015 | -0.727582 |
| Cu | -1.635230 | 1.020751  | 0.055985  |
| N  | -1.439422 | -1.660314 | -0.969005 |
| N  | -1.455306 | -0.241090 | -2.617979 |
| C  | -1.531181 | 2.558201  | 1.395470  |
| C  | -0.376505 | 1.717907  | 1.561706  |
| C  | 0.505053  | 1.431398  | 0.541349  |
| H  | 1.277547  | 0.672771  | 0.670926  |
| H  | 0.596328  | 2.081315  | -0.335578 |
| H  | -0.334200 | 1.097502  | 2.468416  |
| P  | 4.046113  | 1.792808  | 0.461829  |
| O  | 5.570213  | 2.240192  | 0.035277  |
| O  | 4.088989  | 0.656040  | 1.464265  |
| O  | 3.549500  | 0.949227  | -0.907564 |
| O  | 3.256715  | 3.049957  | 0.623191  |
| Na | 3.312257  | -1.070622 | 0.263505  |
| C  | 6.549264  | 1.241533  | -0.138009 |
| H  | 7.508886  | 1.736047  | -0.339963 |
| H  | 6.665167  | 0.615177  | 0.761073  |
| H  | 6.322137  | 0.580515  | -0.992989 |
| C  | 3.278363  | 1.652722  | -2.097512 |
| H  | 2.530870  | 1.092209  | -2.678205 |
| H  | 2.879243  | 2.657115  | -1.884732 |
| H  | 4.184170  | 1.766520  | -2.716821 |
| C  | -1.420358 | 1.002525  | -3.335342 |
| H  | -1.424630 | 3.364871  | 0.652766  |
| C  | -2.382930 | 2.885870  | 2.577489  |
| H  | -1.928455 | -1.674685 | -4.104378 |
| H  | -0.199251 | -1.523592 | -3.720143 |
| H  | -2.485015 | 2.028428  | 3.258192  |
| H  | -3.391279 | 3.225256  | 2.304076  |
| H  | -1.927022 | 3.704289  | 3.158804  |
| H  | -2.176268 | 1.018216  | -4.134103 |
| H  | -0.434921 | 1.168658  | -3.798028 |
| H  | -1.623932 | 1.827500  | -2.639628 |
| H  | -0.542153 | -3.243027 | -2.076128 |
| H  | -2.309811 | -3.108890 | -2.228842 |
| H  | -3.638943 | 3.630710  | -1.405565 |
| H  | -4.206130 | 0.840805  | -2.529836 |
| C  | -4.201485 | 3.328081  | -0.508691 |
| H  | -5.268613 | 3.502071  | -0.726466 |
| H  | -3.918034 | 4.011799  | 0.303807  |
| H  | -5.714650 | 0.676931  | -1.614705 |
| C  | -4.623007 | 0.523938  | -1.562477 |
| Si | -3.932118 | 1.510101  | -0.111349 |
| H  | -4.452602 | -0.559415 | -1.460779 |
| C  | -4.893722 | 0.969995  | 1.418570  |
| H  | -5.783896 | 1.609203  | 1.539529  |
| H  | -4.334555 | 1.015516  | 2.362781  |
| H  | -5.256154 | -0.062481 | 1.298807  |

66

Scheme\_S15\_ts(cc)\_SiMe3 / electronic energy: -4210.17500778 a.u. / lowest freq: -116.91 cm-1

|   |           |          |          |
|---|-----------|----------|----------|
| C | -0.829125 | 2.551754 | 2.397600 |
|---|-----------|----------|----------|

|    |           |           |           |
|----|-----------|-----------|-----------|
| C  | -0.491548 | 1.480425  | 3.428436  |
| C  | -1.104030 | 0.424416  | 1.442617  |
| C  | -1.289894 | 2.261417  | -0.104223 |
| C  | -2.526140 | 2.097054  | -0.742140 |
| C  | -0.228420 | 2.859536  | -0.805899 |
| C  | -2.716642 | 2.528362  | -2.052234 |
| H  | -3.340047 | 1.624637  | -0.185033 |
| C  | -0.432627 | 3.300525  | -2.116384 |
| C  | -1.668071 | 3.140439  | -2.738486 |
| H  | -3.688223 | 2.394136  | -2.533330 |
| H  | 0.405294  | 3.748661  | -2.654303 |
| H  | -1.807224 | 3.486553  | -3.764918 |
| S  | 1.423939  | 3.058303  | -0.111176 |
| O  | 2.335573  | 2.980482  | -1.292914 |
| O  | 1.650369  | 1.875924  | 0.773678  |
| O  | 1.421595  | 4.356262  | 0.583742  |
| Cu | -1.438218 | -0.810030 | -0.015336 |
| N  | -1.131488 | 1.746878  | 1.204935  |
| N  | -0.789454 | 0.231471  | 2.720691  |
| C  | -2.107834 | -2.372035 | -1.318140 |
| C  | -1.001173 | -1.565190 | -1.870913 |
| C  | 0.265281  | -1.502828 | -1.366233 |
| H  | 1.007808  | -0.844935 | -1.827033 |
| H  | 0.647650  | -2.226368 | -0.638261 |
| H  | -1.267142 | -0.886896 | -2.694909 |
| P  | 3.732151  | -2.065781 | -0.595619 |
| O  | 5.194884  | -2.499512 | 0.018470  |
| O  | 3.906172  | -1.041299 | -1.700249 |
| O  | 3.140767  | -1.071421 | 0.622841  |
| O  | 2.919909  | -3.315178 | -0.696539 |
| Na | 3.102208  | 0.824244  | -0.725675 |
| C  | 6.181942  | -1.507571 | 0.186578  |
| H  | 7.086736  | -1.990792 | 0.578861  |
| H  | 6.438703  | -1.013078 | -0.763986 |
| H  | 5.872476  | -0.731304 | 0.908218  |
| C  | 2.723629  | -1.624563 | 1.846264  |
| H  | 2.334057  | -0.811297 | 2.474214  |
| H  | 1.933607  | -2.381503 | 1.707285  |
| H  | 3.559099  | -2.105243 | 2.384038  |
| C  | -0.685168 | -1.041095 | 3.377465  |
| H  | -1.729849 | -3.229873 | -0.737136 |
| C  | -3.063720 | -2.811271 | -2.412787 |
| H  | -1.096665 | 1.555678  | 4.344097  |
| H  | 0.568600  | 1.490388  | 3.730003  |
| H  | -3.385576 | -1.966153 | -3.035945 |
| H  | -3.960370 | -3.331403 | -2.056307 |
| H  | -2.533838 | -3.513006 | -3.075353 |
| H  | -1.406614 | -1.120966 | 4.205627  |
| H  | 0.321752  | -1.191835 | 3.795475  |
| H  | -0.888455 | -1.843558 | 2.656385  |
| H  | -0.001420 | 3.246652  | 2.204656  |
| H  | -1.713973 | 3.147070  | 2.672853  |
| H  | -3.451545 | -3.738519 | 1.440222  |
| H  | -3.336403 | -1.079172 | 2.568495  |
| C  | -4.148571 | -3.426787 | 0.645896  |
| H  | -5.159188 | -3.462811 | 1.083117  |
| H  | -4.105067 | -4.185431 | -0.146031 |
| H  | -5.029601 | -0.895354 | 2.076145  |
| C  | -3.985999 | -0.717087 | 1.759633  |
| Si | -3.757351 | -1.664591 | 0.134238  |
| H  | -3.850351 | 0.370317  | 1.672091  |
| C  | -4.962503 | -0.874038 | -1.075346 |
| H  | -5.533687 | -1.604176 | -1.665057 |
| H  | -4.463399 | -0.201890 | -1.789545 |
| H  | -5.689380 | -0.265481 | -0.515526 |

66

Scheme\_S15\_prod\_SiMe3 / electronic energy: -4210.23135804 a.u. / lowest freq: 20.51 cm<sup>-1</sup>

|   |           |           |           |
|---|-----------|-----------|-----------|
| C | 0.192600  | -2.364213 | -2.403243 |
| C | 0.032219  | -1.179500 | -3.345379 |
| C | -0.386677 | -0.445012 | -1.158300 |
| C | 0.157703  | -2.445036 | 0.118558  |
| C | -0.921725 | -2.886314 | 0.889933  |
| C | 1.467927  | -2.683837 | 0.569358  |
| C | -0.716244 | -3.545183 | 2.098634  |
| H | -1.931460 | -2.694464 | 0.519025  |
| C | 1.667629  | -3.353565 | 1.780208  |
| C | 0.584472  | -3.780447 | 2.544073  |
| H | -1.573269 | -3.875130 | 2.691119  |
| H | 2.689832  | -3.520603 | 2.126887  |
| H | 0.758782  | -4.297206 | 3.490439  |
| S | 2.943830  | -2.218718 | -0.358137 |
| O | 3.948749  | -1.866323 | 0.691223  |
| O | 2.603320  | -0.998765 | -1.151032 |

|    |           |           |           |
|----|-----------|-----------|-----------|
| O  | 3.285676  | -3.400477 | -1.167737 |
| Cu | -0.839261 | 0.746403  | 0.361903  |
| N  | -0.102896 | -1.762732 | -1.094926 |
| N  | -0.332848 | -0.087372 | -2.442860 |
| C  | -3.808881 | 0.134615  | 1.457027  |
| C  | -2.349643 | 0.185597  | 1.827174  |
| C  | -1.641164 | 1.321964  | 2.151734  |
| H  | -0.685969 | 1.251316  | 2.684206  |
| H  | -2.098496 | 2.316728  | 2.104006  |
| H  | -1.897994 | -0.779420 | 2.093447  |
| P  | 1.603903  | 2.548103  | 0.612153  |
| O  | 1.877718  | 4.051744  | 1.175667  |
| O  | 2.107622  | 1.472433  | 1.542186  |
| O  | 2.654949  | 2.430556  | -0.665708 |
| O  | 0.172312  | 2.572871  | 0.110565  |
| Na | 3.683621  | 0.439216  | 0.297380  |
| C  | 3.109912  | 4.320079  | 1.821584  |
| H  | 3.130905  | 5.389347  | 2.064870  |
| H  | 3.213323  | 3.744888  | 2.754055  |
| H  | 3.973845  | 4.097279  | 1.174148  |
| C  | 2.546653  | 3.337985  | -1.749255 |
| H  | 2.958418  | 2.856955  | -2.645558 |
| H  | 1.498719  | 3.608978  | -1.945918 |
| H  | 3.115279  | 4.260702  | -1.553567 |
| C  | -0.541338 | 1.239496  | -2.949272 |
| H  | -4.302710 | 0.971623  | 1.988244  |
| C  | -4.442899 | -1.173081 | 1.927011  |
| H  | -0.756961 | -1.331758 | -4.099406 |
| H  | 0.958309  | -0.924938 | -3.885335 |
| H  | -4.017742 | -2.043889 | 1.402332  |
| H  | -5.528628 | -1.192867 | 1.752225  |
| H  | -4.287783 | -1.344065 | 3.004328  |
| H  | -1.479186 | 1.317627  | -3.524328 |
| H  | 0.285056  | 1.523814  | -3.618797 |
| H  | -0.568146 | 1.946637  | -2.111134 |
| H  | 1.204580  | -2.794747 | -2.413719 |
| H  | -0.521191 | -3.177665 | -2.608770 |
| H  | -6.485915 | 1.502794  | 0.242276  |
| H  | -3.887717 | 2.947529  | -0.275231 |
| C  | -6.140873 | 0.705575  | -0.434844 |
| H  | -6.467663 | 0.982445  | -1.449790 |
| H  | -6.682862 | -0.213578 | -0.165186 |
| H  | -3.794496 | 2.363211  | -1.942668 |
| C  | -3.512064 | 2.124788  | -0.904799 |
| Si | -4.275203 | 0.495418  | -0.366908 |
| H  | -2.411839 | 2.162042  | -0.854303 |
| C  | -3.790334 | -0.941819 | -1.478612 |
| H  | -4.519708 | -1.762704 | -1.390043 |
| H  | -2.801687 | -1.357806 | -1.235847 |
| H  | -3.770081 | -0.646186 | -2.540127 |

57

Scheme\_S15\_ts(CuXadd)\_Me / electronic energy: -3840.89997454 a.u. / lowest freq: -447.59 cm<sup>-1</sup>

|    |           |           |           |
|----|-----------|-----------|-----------|
| C  | -3.912731 | -1.233701 | -1.089792 |
| C  | -3.861760 | -0.552559 | -2.442690 |
| C  | -2.633560 | 0.735624  | -0.928095 |
| C  | -2.443475 | -0.786474 | 0.946237  |
| C  | -2.904348 | -0.017104 | 2.020996  |
| C  | -1.501536 | -1.803617 | 1.188699  |
| C  | -2.460621 | -0.260515 | 3.318821  |
| H  | -3.627676 | 0.777095  | 1.819237  |
| C  | -1.072388 | -2.052645 | 2.494166  |
| C  | -1.549267 | -1.287847 | 3.557069  |
| H  | -2.831759 | 0.351659  | 4.144157  |
| H  | -0.339450 | -2.843773 | 2.661009  |
| H  | -1.199635 | -1.492118 | 4.571539  |
| S  | -0.721940 | -2.717958 | -0.155311 |
| O  | 0.293621  | -3.592214 | 0.514761  |
| O  | -0.011306 | -1.691064 | -0.979724 |
| O  | -1.778937 | -3.456268 | -0.864542 |
| Cu | -1.340669 | 1.882584  | -0.116891 |
| N  | -2.886286 | -0.476609 | -0.361082 |
| N  | -3.276844 | 0.746706  | -2.110815 |
| C  | 0.183843  | 2.971245  | 0.960581  |
| C  | 0.585453  | 1.676780  | 0.400566  |
| C  | 1.465929  | 1.580164  | -0.759470 |
| H  | 1.320567  | 0.653194  | -1.338687 |
| H  | 1.351819  | 2.425169  | -1.453476 |
| H  | 0.608111  | 0.823772  | 1.093736  |
| P  | 3.627626  | 0.257284  | -0.079883 |
| O  | 5.134395  | 0.761920  | 0.106415  |
| O  | 3.067233  | -0.620453 | 0.992179  |
| O  | 3.600108  | -0.688989 | -1.413579 |
| O  | 2.932615  | 1.619904  | -0.447616 |

|    |           |           |           |
|----|-----------|-----------|-----------|
| Na | 2.086891  | -2.317220 | -0.185190 |
| C  | 6.121590  | -0.150679 | 0.591113  |
| H  | 7.059377  | 0.408388  | 0.671375  |
| H  | 5.848677  | -0.541899 | 1.580499  |
| H  | 6.265487  | -0.989877 | -0.105502 |
| C  | 4.037009  | -0.184408 | -2.675680 |
| H  | 4.003399  | -1.014716 | -3.388793 |
| H  | 3.379104  | 0.621016  | -3.031819 |
| H  | 5.067953  | 0.192740  | -2.614255 |
| C  | -3.094897 | 1.749224  | -3.120623 |
| H  | 0.707086  | 3.815220  | 0.488203  |
| C  | -1.585323 | 3.887113  | 0.647638  |
| C  | 0.188161  | 3.050823  | 2.465255  |
| H  | -4.847217 | -0.439507 | -2.915810 |
| H  | -3.204405 | -1.087044 | -3.154072 |
| H  | -1.931507 | 4.120698  | -0.375396 |
| H  | -1.158605 | 4.809838  | 1.055883  |
| H  | -2.453285 | 3.618566  | 1.273974  |
| H  | -0.432022 | 2.254835  | 2.905565  |
| H  | -0.177097 | 4.010185  | 2.858544  |
| H  | 1.211705  | 2.898796  | 2.844070  |
| H  | -4.059014 | 2.061124  | -3.548898 |
| H  | -2.460465 | 1.385347  | -3.946596 |
| H  | -2.608721 | 2.626141  | -2.675550 |
| H  | -3.672255 | -2.301699 | -1.122414 |
| H  | -4.892315 | -1.102499 | -0.594993 |

57

Scheme\_S15\_pc\_Me / electronic energy: -3840.95167061 a.u. / lowest freq: 21.13 cm<sup>-1</sup>

|    |           |           |           |
|----|-----------|-----------|-----------|
| C  | -2.538190 | 1.410853  | 2.114028  |
| C  | -2.117775 | 0.462685  | 3.220883  |
| C  | -2.058107 | -0.697022 | 1.191608  |
| C  | -2.310172 | 1.090611  | -0.413193 |
| C  | -3.137381 | 0.419558  | -1.326257 |
| C  | -1.527183 | 2.167513  | -0.874691 |
| C  | -3.199939 | 0.806653  | -2.660694 |
| H  | -3.733849 | -0.420030 | -0.960033 |
| C  | -1.611202 | 2.559851  | -2.213794 |
| C  | -2.441986 | 1.888957  | -3.106699 |
| H  | -3.851647 | 0.265237  | -3.350535 |
| H  | -0.985099 | 3.387183  | -2.552647 |
| H  | -2.487808 | 2.206428  | -4.150604 |
| S  | -0.339831 | 3.039933  | 0.158512  |
| O  | 0.650251  | 3.624072  | -0.799676 |
| O  | 0.335292  | 1.990223  | 0.986914  |
| O  | -1.090720 | 4.045794  | 0.929470  |
| Cu | -1.694523 | -2.135849 | -0.130503 |
| N  | -2.247933 | 0.611852  | 0.910604  |
| N  | -2.059974 | -0.822653 | 2.523509  |
| C  | -0.248990 | -2.878726 | -1.354447 |
| C  | 0.209128  | -1.697072 | -0.744407 |
| C  | 1.065655  | -1.717569 | 0.462600  |
| H  | 0.949445  | -0.810988 | 1.078459  |
| H  | 0.868906  | -2.592827 | 1.096482  |
| H  | 0.197997  | -0.760305 | -1.319298 |
| P  | 3.352925  | -0.585904 | -0.262855 |
| O  | 4.760233  | -1.294449 | -0.521147 |
| O  | 2.839824  | 0.342859  | -1.312328 |
| O  | 3.522719  | 0.345909  | 1.061994  |
| O  | 2.513764  | -1.862751 | 0.144221  |
| Na | 2.359182  | 2.238307  | -0.141900 |
| C  | 5.861159  | -0.502275 | -0.977612 |
| H  | 6.713244  | -1.179542 | -1.090709 |
| H  | 5.638303  | -0.037641 | -1.947538 |
| H  | 6.118505  | 0.278892  | -0.247652 |
| C  | 3.959346  | -0.206029 | 2.307114  |
| H  | 4.145307  | 0.632756  | 2.985498  |
| H  | 3.187544  | -0.856659 | 2.741214  |
| H  | 4.888255  | -0.779411 | 2.180635  |
| C  | -1.735450 | -2.036153 | 3.218555  |
| H  | 0.057750  | -3.831337 | -0.898662 |
| C  | -3.183957 | -3.460999 | -0.386759 |
| C  | -0.669766 | -2.946846 | -2.786357 |
| H  | -2.827831 | 0.428838  | 4.059139  |
| H  | -1.122171 | 0.705153  | 3.634316  |
| H  | -3.972894 | -3.424075 | 0.388777  |
| H  | -2.847649 | -4.514471 | -0.435733 |
| H  | -3.695637 | -3.270559 | -1.351097 |
| H  | -1.059684 | -1.982548 | -3.144950 |
| H  | -1.445527 | -3.707055 | -2.957693 |
| H  | 0.178097  | -3.212197 | -3.442247 |
| H  | -0.731481 | -1.987717 | 3.672840  |
| H  | -1.762663 | -2.871690 | 2.506422  |
| H  | -2.458860 | -2.236290 | 4.022535  |

H -1.995812 2.361988 2.118264  
 H -3.617855 1.635158 2.143268

57

Scheme\_S15\_ts(oa)\_Me / electronic energy: -3840.94344163 a.u. / lowest freq: -330.00 cm<sup>-1</sup>

C -2.482162 -1.868772 -1.863614  
 C -2.366063 -0.959434 -3.073142  
 C -2.210114 0.347857 -1.148725  
 C -2.024732 -1.315205 0.594245  
 C -2.838226 -0.681410 1.545751  
 C -1.063650 -2.245892 1.037264  
 C -2.713047 -0.962177 2.902342  
 H -3.577006 0.043638 1.192941  
 C -0.958572 -2.533226 2.401129  
 C -1.775953 -1.900003 3.333387  
 H -3.358519 -0.452595 3.621525  
 H -0.198294 -3.246501 2.724241  
 H -1.673043 -2.134910 4.394887  
 S 0.107548 -3.059361 -0.062385  
 O 1.239917 -3.475496 0.821255  
 O 0.576310 -2.002167 -1.013719  
 O -0.602207 -4.185083 -0.694091  
 Cu -1.971278 1.919954 0.047915  
 N -2.162480 -0.943571 -0.760115  
 N -2.405553 0.373528 -2.468271  
 C -0.783231 3.068148 1.208227  
 C -0.104486 1.854633 0.936580  
 C 0.579473 1.614296 -0.285543  
 H 0.730522 0.573302 -0.588362  
 H 0.393899 2.297031 -1.119129  
 H -0.051461 1.079363 1.712070  
 P 3.312587 0.971777 0.164191  
 O 4.723341 1.740425 0.322798  
 O 3.021755 -0.049045 1.225846  
 O 3.488475 0.043296 -1.190716  
 O 2.336403 2.125062 -0.141402  
 Na 2.725750 -1.932759 0.000885  
 C 5.888076 0.982537 0.629241  
 H 6.714475 1.691230 0.752862  
 H 5.765149 0.414534 1.562608  
 H 6.140891 0.286002 -0.185242  
 C 3.637259 0.663231 -2.462043  
 H 3.915367 -0.114084 -3.182616  
 H 2.697531 1.132911 -2.789058  
 H 4.428210 1.428223 -2.444276  
 C -2.358485 1.563224 -3.271984  
 H -0.571364 3.912189 0.536019  
 C -3.619199 3.040249 0.129348  
 C -1.280476 3.428328 2.566460  
 H -3.181458 -1.090192 -3.797904  
 H -1.412097 -1.089606 -3.614234  
 H -4.375483 2.728228 -0.612419  
 H -3.420402 4.115071 -0.027426  
 H -4.077796 2.941248 1.130148  
 H -1.590943 2.543097 3.140556  
 H -2.133529 4.119670 2.520674  
 H -0.497200 3.935947 3.155123  
 H -3.216894 1.610582 -3.957634  
 H -1.438070 1.602564 -3.877664  
 H -2.383436 2.441160 -2.613428  
 H -1.802045 -2.726101 -1.889642  
 H -3.506939 -2.251147 -1.723221

57

Scheme\_S15\_pa\_Me / electronic energy: -3840.96546396 a.u. / lowest freq: 28.92 cm<sup>-1</sup>

C -2.326294 -1.200569 -2.456464  
 C -1.441426 -0.466581 -3.458341  
 C -1.404869 0.697610 -1.447625  
 C -2.633962 -0.756641 0.039893  
 C -3.587927 0.060211 0.658019  
 C -2.122378 -1.869732 0.727575  
 C -4.048428 -0.232369 1.938884  
 H -3.964188 0.928984 0.110930  
 C -2.599997 -2.161744 2.007888  
 C -3.560818 -1.353392 2.610732  
 H -4.792556 0.413714 2.409779  
 H -2.181039 -3.016936 2.542317  
 H -3.918275 -1.594319 3.614158  
 S -0.799920 -2.910866 0.075905  
 O -0.027073 -3.325931 1.286206  
 O 0.053681 -2.027828 -0.775540  
 O -1.464561 -4.008175 -0.645857  
 Cu -1.016334 2.006035 -0.043703  
 N -2.161598 -0.386771 -1.241351  
 N -1.004966 0.719172 -2.713003

|    |           |           |           |
|----|-----------|-----------|-----------|
| C  | -0.270152 | 3.146412  | 1.529066  |
| C  | -0.431252 | 1.809343  | 1.959751  |
| C  | 0.140584  | 0.762319  | 1.240616  |
| H  | -0.131953 | -0.269299 | 1.474648  |
| H  | 1.051940  | 0.938564  | 0.656789  |
| H  | -1.224161 | 1.589991  | 2.686979  |
| P  | 3.668173  | 0.333112  | 0.594649  |
| O  | 5.247104  | 0.284265  | 0.152450  |
| O  | 3.384341  | -0.662534 | 1.701612  |
| O  | 2.921148  | -0.446337 | -0.693419 |
| O  | 3.266732  | 1.774572  | 0.620060  |
| Na | 1.877875  | -2.022128 | 0.707543  |
| C  | 5.894202  | -0.967145 | 0.072842  |
| H  | 6.947295  | -0.787274 | -0.180307 |
| H  | 5.854337  | -1.514047 | 1.028153  |
| H  | 5.458419  | -1.608586 | -0.712319 |
| C  | 2.770708  | 0.225328  | -1.921369 |
| H  | 2.138192  | -0.390332 | -2.575609 |
| H  | 2.301190  | 1.214107  | -1.788228 |
| H  | 3.741493  | 0.377650  | -2.424029 |
| C  | -0.234919 | 1.758291  | -3.339250 |
| H  | 0.647194  | 3.364972  | 0.960595  |
| C  | -1.941900 | 3.588555  | -0.768199 |
| C  | -0.948469 | 4.298981  | 2.167472  |
| H  | -1.978631 | -0.165788 | -4.369739 |
| H  | -0.561391 | -1.052540 | -3.768190 |
| H  | -2.382586 | 3.352959  | -1.747400 |
| H  | -1.242667 | 4.431867  | -0.870267 |
| H  | -2.737685 | 3.854757  | -0.055276 |
| H  | -1.896479 | 4.011486  | 2.642019  |
| H  | -1.146113 | 5.108084  | 1.451203  |
| H  | -0.303670 | 4.732294  | 2.949391  |
| H  | -0.823559 | 2.274590  | -4.113423 |
| H  | 0.664619  | 1.345306  | -3.818376 |
| H  | 0.071004  | 2.491020  | -2.583040 |
| H  | -2.011289 | -2.236710 | -2.274795 |
| H  | -3.387506 | -1.213249 | -2.748344 |

57

Scheme\_S15\_ts(cc)\_Me / electronic energy: -3840.94348055 a.u. / lowest freq: -352.34 cm<sup>-1</sup>

|    |           |           |           |
|----|-----------|-----------|-----------|
| C  | -2.984634 | -1.996230 | -1.597999 |
| C  | -2.852657 | -1.331349 | -2.960011 |
| C  | -2.398727 | 0.261777  | -1.319572 |
| C  | -2.368247 | -1.050074 | 0.703011  |
| C  | -3.137447 | -0.234367 | 1.543484  |
| C  | -1.402522 | -1.899912 | 1.273970  |
| C  | -2.964188 | -0.258890 | 2.924474  |
| H  | -3.884637 | 0.420271  | 1.088372  |
| C  | -1.250080 | -1.932706 | 2.662872  |
| C  | -2.023659 | -1.119925 | 3.488075  |
| H  | -3.574416 | 0.388167  | 3.559171  |
| H  | -0.486221 | -2.586987 | 3.086983  |
| H  | -1.882317 | -1.153996 | 4.570388  |
| S  | -0.272708 | -2.897616 | 0.285095  |
| O  | 0.880487  | -3.169784 | 1.195196  |
| O  | 0.164373  | -2.004665 | -0.832499 |
| O  | -1.010852 | -4.100810 | -0.134433 |
| Cu | -1.685371 | 1.776149  | -0.279684 |
| N  | -2.546325 | -0.921479 | -0.693187 |
| N  | -2.636394 | 0.077553  | -2.616922 |
| C  | -0.898011 | 3.387533  | 0.852127  |
| C  | -0.005310 | 2.225441  | 0.800476  |
| C  | 0.528553  | 1.731078  | -0.359058 |
| H  | 1.119518  | 0.814837  | -0.368125 |
| H  | 0.530625  | 2.316304  | -1.286050 |
| H  | 0.104398  | 1.635382  | 1.721332  |
| P  | 3.921381  | 0.845075  | 0.106582  |
| O  | 5.550958  | 0.631731  | 0.062690  |
| O  | 3.315165  | 0.065927  | 1.256856  |
| O  | 3.430643  | -0.121516 | -1.188562 |
| O  | 3.664116  | 2.285280  | -0.187844 |
| Na | 2.266435  | -1.608168 | 0.192707  |
| C  | 6.080568  | -0.643386 | 0.346064  |
| H  | 7.174906  | -0.579577 | 0.280134  |
| H  | 5.814660  | -0.987340 | 1.358495  |
| H  | 5.741745  | -1.404378 | -0.378784 |
| C  | 3.720465  | 0.312871  | -2.499213 |
| H  | 3.276773  | -0.399448 | -3.207360 |
| H  | 3.303793  | 1.314027  | -2.693883 |
| H  | 4.807397  | 0.352003  | -2.682953 |
| C  | -2.463977 | 1.068796  | -3.641874 |
| H  | -0.679603 | 4.130099  | 0.073202  |
| C  | -2.961226 | 3.266257  | 0.421841  |
| C  | -1.099652 | 3.969491  | 2.217386  |

|   |           |           |           |
|---|-----------|-----------|-----------|
| H | -3.745759 | -1.448070 | -3.590189 |
| H | -1.988304 | -1.702837 | -3.536113 |
| H | -3.584191 | 2.941732  | -0.427204 |
| H | -2.922940 | 4.358300  | 0.393577  |
| H | -3.403659 | 2.926853  | 1.366640  |
| H | -1.435777 | 3.208000  | 2.935711  |
| H | -1.817108 | 4.798519  | 2.230689  |
| H | -0.137939 | 4.358105  | 2.585826  |
| H | -3.365186 | 1.150540  | -4.266962 |
| H | -1.616877 | 0.817210  | -4.299519 |
| H | -2.268830 | 2.043007  | -3.178026 |
| H | -2.363621 | -2.892856 | -1.483828 |
| H | -4.024402 | -2.270858 | -1.357500 |

57

Scheme\_S15\_prod\_Me / electronic energy: -3841.01738783 a.u. / lowest freq: 18.95 cm<sup>-1</sup>

|    |           |           |           |
|----|-----------|-----------|-----------|
| C  | 3.330604  | 0.001795  | 2.042541  |
| C  | 2.493973  | 0.227751  | 3.296417  |
| C  | 1.344369  | 1.127374  | 1.473179  |
| C  | 2.752872  | 0.509364  | -0.390216 |
| C  | 3.006266  | 1.692445  | -1.094963 |
| C  | 2.705415  | -0.711244 | -1.085267 |
| C  | 3.231996  | 1.669312  | -2.468050 |
| H  | 3.029324  | 2.633663  | -0.540173 |
| C  | 2.947232  | -0.726389 | -2.462308 |
| C  | 3.214702  | 0.453400  | -3.151794 |
| H  | 3.429352  | 2.601203  | -3.002564 |
| H  | 2.892243  | -1.678637 | -2.993612 |
| H  | 3.397405  | 0.422966  | -4.228067 |
| S  | 2.267252  | -2.274323 | -0.297769 |
| O  | 1.616138  | -3.060869 | -1.388835 |
| O  | 1.254495  | -1.935711 | 0.748408  |
| O  | 3.518920  | -2.851658 | 0.218582  |
| Cu | -0.012499 | 1.661620  | 0.157333  |
| N  | 2.487029  | 0.600474  | 0.998368  |
| N  | 1.331913  | 0.967807  | 2.794562  |
| C  | -2.232933 | 3.527430  | -0.572717 |
| C  | -1.114224 | 2.804295  | -1.270574 |
| C  | -1.132431 | 1.477285  | -1.596562 |
| H  | -0.361262 | 1.052945  | -2.251556 |
| H  | -2.014643 | 0.857180  | -1.378262 |
| H  | -0.295996 | 3.439856  | -1.646926 |
| P  | -3.301672 | -1.514833 | -0.493257 |
| O  | -4.425124 | -2.262858 | 0.441140  |
| O  | -2.638172 | -2.508739 | -1.424307 |
| O  | -2.054872 | -1.268809 | 0.606977  |
| O  | -3.891554 | -0.203738 | -0.907481 |
| Na | -0.557290 | -2.650100 | -0.582791 |
| C  | -4.177224 | -3.581307 | 0.878015  |
| H  | -5.022236 | -3.892842 | 1.506060  |
| H  | -4.091023 | -4.285902 | 0.035967  |
| H  | -3.258554 | -3.652757 | 1.485774  |
| C  | -2.182746 | -0.288037 | 1.605930  |
| H  | -1.422206 | -0.482613 | 2.374838  |
| H  | -2.024876 | 0.734025  | 1.206489  |
| H  | -3.173917 | -0.315650 | 2.088644  |
| C  | 0.296334  | 1.398174  | 3.690485  |
| H  | -2.950785 | 2.765688  | -0.218311 |
| C  | -1.709597 | 4.307001  | 0.625554  |
| C  | -2.953742 | 4.438252  | -1.559914 |
| H  | 3.016853  | 0.812568  | 4.068345  |
| H  | 2.156127  | -0.710155 | 3.765532  |
| H  | -1.189518 | 3.645645  | 1.339529  |
| H  | -2.523590 | 4.808842  | 1.168067  |
| H  | -0.990354 | 5.081704  | 0.315895  |
| H  | -2.273556 | 5.200350  | -1.971285 |
| H  | -3.783427 | 4.967331  | -1.069234 |
| H  | -3.370858 | 3.872943  | -2.404914 |
| H  | 0.671792  | 2.149988  | 4.401920  |
| H  | -0.094851 | 0.550924  | 4.273937  |
| H  | -0.526348 | 1.840459  | 3.116608  |
| H  | 3.516731  | -1.059729 | 1.828601  |
| H  | 4.303430  | 0.515490  | 2.074992  |

64

Scheme\_S15\_ts(CuXadd)\_Ph / electronic energy: -4032.49730588 a.u. / lowest freq: -323.69 cm<sup>-1</sup>

|   |           |          |           |
|---|-----------|----------|-----------|
| C | -1.513526 | 3.259879 | 1.799579  |
| C | -1.534133 | 2.465021 | 3.093745  |
| C | -1.841617 | 0.975492 | 1.317150  |
| C | -1.327271 | 2.364540 | -0.588483 |
| C | -2.343718 | 1.972706 | -1.471966 |
| C | -0.112613 | 2.840226 | -1.121040 |
| C | -2.179286 | 2.075735 | -2.849752 |
| H | -3.277239 | 1.593844 | -1.048556 |
| C | 0.036903  | 2.955653 | -2.506363 |

|    |           |           |           |
|----|-----------|-----------|-----------|
| C  | -0.988408 | 2.581671  | -3.370585 |
| H  | -2.988525 | 1.767777  | -3.516445 |
| H  | 0.989499  | 3.315574  | -2.899093 |
| H  | -0.850315 | 2.674367  | -4.449992 |
| S  | 1.324662  | 3.220778  | -0.102914 |
| O  | 2.489516  | 3.115255  | -1.037181 |
| O  | 1.408396  | 2.126005  | 0.914625  |
| O  | 1.123657  | 4.569836  | 0.453547  |
| Cu | -1.571347 | -0.605808 | 0.269752  |
| N  | -1.538928 | 2.190803  | 0.793391  |
| N  | -1.957077 | 1.137941  | 2.646800  |
| C  | -0.952522 | -2.251517 | -0.962082 |
| C  | 0.132400  | -1.433032 | -0.393355 |
| C  | 0.974071  | -1.927410 | 0.695810  |
| H  | 1.372719  | -1.128613 | 1.345177  |
| H  | 0.447713  | -2.639499 | 1.347913  |
| H  | 0.600412  | -0.711091 | -1.076722 |
| P  | 3.451889  | -1.884889 | -0.166696 |
| O  | 4.483746  | -3.081066 | -0.406790 |
| O  | 3.349517  | -0.847103 | -1.237275 |
| O  | 3.960176  | -1.056178 | 1.144745  |
| O  | 2.178895  | -2.709375 | 0.263457  |
| Na | 3.270874  | 1.144159  | -0.137502 |
| C  | 5.754561  | -2.800447 | -0.999689 |
| H  | 6.285949  | -3.754344 | -1.076374 |
| H  | 5.637521  | -2.370283 | -2.003356 |
| H  | 6.343191  | -2.112802 | -0.374807 |
| C  | 4.193075  | -1.725808 | 2.384911  |
| H  | 4.458382  | -0.961623 | 3.122645  |
| H  | 3.293902  | -2.258566 | 2.725829  |
| H  | 5.022447  | -2.441631 | 2.293623  |
| C  | -2.061928 | 0.050872  | 3.577273  |
| H  | -0.944112 | -3.281255 | -0.577611 |
| C  | -1.071705 | -2.195359 | -2.463005 |
| H  | -2.227646 | 2.872828  | 3.843235  |
| H  | -0.536658 | 2.397895  | 3.564639  |
| H  | -1.212869 | -1.162411 | -2.817101 |
| H  | -1.894920 | -2.802876 | -2.862846 |
| H  | -0.134327 | -2.556682 | -2.913923 |
| H  | -2.765009 | 0.293283  | 4.387202  |
| H  | -1.087322 | -0.190095 | 4.036905  |
| H  | -2.428935 | -0.841048 | 3.054430  |
| H  | -0.629310 | 3.899497  | 1.691037  |
| H  | -2.408547 | 3.894829  | 1.683140  |
| H  | -3.583868 | -1.123000 | -2.200809 |
| H  | -5.887809 | -1.984510 | -1.965349 |
| C  | -3.826758 | -1.771630 | -1.351313 |
| C  | -5.130993 | -2.254701 | -1.222624 |
| C  | -2.836505 | -2.090161 | -0.407885 |
| C  | -5.473680 | -3.078420 | -0.148437 |
| H  | -6.493250 | -3.459663 | -0.049291 |
| C  | -3.195503 | -2.944064 | 0.650402  |
| C  | -4.497112 | -3.423618 | 0.790690  |
| H  | -4.752827 | -4.075690 | 1.631312  |
| H  | -2.433305 | -3.244611 | 1.381748  |

64

Scheme\_S15\_pc\_Ph / electronic energy: -4032.54192279 a.u. / lowest freq: 15.99 cm<sup>-1</sup>

|    |           |           |           |
|----|-----------|-----------|-----------|
| C  | -0.569389 | 2.614829  | 2.330629  |
| C  | -0.530156 | 1.553870  | 3.414726  |
| C  | -1.306665 | 0.567366  | 1.443152  |
| C  | -0.862941 | 2.290524  | -0.189440 |
| C  | -2.030055 | 2.162055  | -0.956559 |
| C  | 0.289234  | 2.832914  | -0.792111 |
| C  | -2.064949 | 2.573611  | -2.285220 |
| H  | -2.916336 | 1.733217  | -0.481582 |
| C  | 0.238836  | 3.257312  | -2.123009 |
| C  | -0.929502 | 3.133895  | -2.869936 |
| H  | -2.987624 | 2.465177  | -2.860364 |
| H  | 1.146226  | 3.662467  | -2.574790 |
| H  | -0.947819 | 3.466814  | -3.909857 |
| S  | 1.877739  | 2.947494  | 0.045465  |
| O  | 2.893430  | 2.963889  | -1.053686 |
| O  | 2.022925  | 1.680925  | 0.831534  |
| O  | 1.852223  | 4.177521  | 0.855459  |
| Cu | -1.850586 | -0.799017 | 0.099849  |
| N  | -0.875061 | 1.809617  | 1.135410  |
| N  | -1.190156 | 0.419441  | 2.766416  |
| C  | -1.010636 | -2.068729 | -1.286143 |
| C  | -0.006559 | -1.325627 | -0.651426 |
| C  | 0.775905  | -1.871926 | 0.484764  |
| H  | 1.184878  | -1.080189 | 1.132981  |
| H  | 0.179261  | -2.552757 | 1.106855  |
| H  | 0.418597  | -0.453708 | -1.168349 |

|    |           |           |           |
|----|-----------|-----------|-----------|
| P  | 3.258345  | -2.063106 | -0.434785 |
| O  | 4.119251  | -3.393141 | -0.623250 |
| O  | 3.245918  | -1.078419 | -1.556223 |
| O  | 3.880190  | -1.247579 | 0.825888  |
| O  | 1.905176  | -2.727574 | 0.050253  |
| Na | 3.744825  | 0.893542  | -0.533648 |
| C  | 5.414809  | -3.305141 | -1.225772 |
| H  | 5.816211  | -4.322533 | -1.260899 |
| H  | 5.349249  | -2.907405 | -2.247201 |
| H  | 6.089327  | -2.674133 | -0.629048 |
| C  | 4.072477  | -1.874554 | 2.096785  |
| H  | 4.111229  | -1.081457 | 2.851197  |
| H  | 3.243799  | -2.555643 | 2.335143  |
| H  | 5.016545  | -2.436254 | 2.110192  |
| C  | -1.413178 | -0.811238 | 3.469922  |
| H  | -1.210323 | -3.079070 | -0.901953 |
| C  | -1.475621 | -1.793222 | -2.677509 |
| H  | -1.057933 | 1.848652  | 4.332629  |
| H  | 0.499615  | 1.269027  | 3.696278  |
| H  | -1.319115 | -0.741875 | -2.962279 |
| H  | -2.540847 | -2.027521 | -2.816918 |
| H  | -0.921689 | -2.407720 | -3.408138 |
| H  | -0.469342 | -1.227924 | 3.859343  |
| H  | -1.862377 | -1.539582 | 2.783237  |
| H  | -2.093771 | -0.665612 | 4.321947  |
| H  | 0.368308  | 3.170070  | 2.223152  |
| H  | -1.380475 | 3.345326  | 2.487977  |
| H  | -4.029423 | -0.033330 | -1.918774 |
| H  | -6.438518 | -0.415316 | -2.174731 |
| C  | -4.538805 | -0.645582 | -1.160697 |
| C  | -5.911811 | -0.857606 | -1.322279 |
| C  | -3.796736 | -1.180504 | -0.083983 |
| C  | -6.612873 | -1.635545 | -0.399156 |
| H  | -7.686360 | -1.808450 | -0.517799 |
| C  | -4.546278 | -1.960766 | 0.823616  |
| C  | -5.918502 | -2.190269 | 0.677470  |
| H  | -6.451896 | -2.805426 | 1.410191  |
| H  | -4.050474 | -2.418010 | 1.690852  |

64

Scheme\_515\_ts(oa)\_Ph / electronic energy: -4032.53119545 a.u. / lowest freq: -311.05 cm<sup>-1</sup>

|    |           |           |           |
|----|-----------|-----------|-----------|
| C  | -0.649965 | -2.663894 | -2.223022 |
| C  | -0.671757 | -1.643697 | -3.346872 |
| C  | -1.343590 | -0.590182 | -1.379908 |
| C  | -0.812511 | -2.237072 | 0.300041  |
| C  | -1.940919 | -2.075937 | 1.116065  |
| C  | 0.372360  | -2.743832 | 0.868287  |
| C  | -1.904826 | -2.415244 | 2.465235  |
| H  | -2.855296 | -1.682119 | 0.664541  |
| C  | 0.391652  | -3.099420 | 2.219792  |
| C  | -0.737365 | -2.939350 | 3.018756  |
| H  | -2.797774 | -2.281351 | 3.080460  |
| H  | 1.323277  | -3.477850 | 2.644302  |
| H  | -0.699980 | -3.216902 | 4.074241  |
| S  | 1.915455  | -2.893063 | -0.045949 |
| O  | 2.984012  | -2.888899 | 1.000209  |
| O  | 2.020004  | -1.648774 | -0.873109 |
| O  | 1.840606  | -4.143540 | -0.820655 |
| Cu | -1.858305 | 0.797239  | -0.047077 |
| N  | -0.894085 | -1.814673 | -1.043466 |
| N  | -1.298636 | -0.483961 | -2.708071 |
| C  | -1.244947 | 2.222792  | 1.284205  |
| C  | -0.133539 | 1.430989  | 0.915615  |
| C  | 0.561739  | 1.594641  | -0.309788 |
| H  | 1.135492  | 0.746316  | -0.694276 |
| H  | 0.125074  | 2.238877  | -1.076299 |
| H  | 0.233812  | 0.667799  | 1.614272  |
| P  | 3.313148  | 2.098899  | 0.367612  |
| O  | 4.325738  | 3.348457  | 0.521432  |
| O  | 3.346766  | 1.117697  | 1.505249  |
| O  | 3.930280  | 1.213516  | -0.883612 |
| O  | 2.008471  | 2.776793  | -0.086370 |
| Na | 3.814792  | -0.825356 | 0.436182  |
| C  | 5.672900  | 3.101055  | 0.904037  |
| H  | 6.154513  | 4.074455  | 1.050777  |
| H  | 5.729125  | 2.532355  | 1.843749  |
| H  | 6.218930  | 2.554364  | 0.119305  |
| C  | 3.878776  | 1.721106  | -2.209237 |
| H  | 4.520854  | 1.090100  | -2.834901 |
| H  | 2.854002  | 1.690115  | -2.609924 |
| H  | 4.247703  | 2.756765  | -2.259010 |
| C  | -1.541742 | 0.728973  | -3.436885 |
| H  | -1.422466 | 3.134126  | 0.695703  |
| C  | -1.818614 | 2.208948  | 2.657746  |

|   |           |           |           |
|---|-----------|-----------|-----------|
| H | -1.246987 | -1.972148 | -4.223421 |
| H | 0.340161  | -1.366948 | -3.691959 |
| H | -1.696959 | 1.231692  | 3.147417  |
| H | -2.887064 | 2.464778  | 2.660931  |
| H | -1.315074 | 2.954295  | 3.296432  |
| H | -2.283471 | 0.575113  | -4.234388 |
| H | -0.615711 | 1.104403  | -3.902323 |
| H | -1.921193 | 1.491521  | -2.745599 |
| H | 0.294147  | -3.212726 | -2.143316 |
| H | -1.466635 | -3.399944 | -2.306960 |
| H | -4.043120 | 0.155767  | 2.007846  |
| H | -6.481841 | 0.436006  | 2.127457  |
| C | -4.553412 | 0.645969  | 1.167972  |
| C | -5.940489 | 0.804729  | 1.250207  |
| C | -3.809122 | 1.095881  | 0.060780  |
| C | -6.635086 | 1.437271  | 0.217796  |
| H | -7.719024 | 1.568548  | 0.277455  |
| C | -4.539712 | 1.728522  | -0.962950 |
| C | -5.925979 | 1.902088  | -0.890511 |
| H | -6.456145 | 2.402974  | -1.706996 |
| H | -4.025793 | 2.106548  | -1.855825 |

64

Scheme\_S15\_pa\_Ph / electronic energy: -4032.54742087 a.u. / lowest freq: 25.49 cm-1

|    |           |           |           |
|----|-----------|-----------|-----------|
| C  | -0.788988 | 2.339519  | 2.495986  |
| C  | -0.568425 | 1.154110  | 3.426820  |
| C  | -1.207842 | 0.351782  | 1.345525  |
| C  | -1.067578 | 2.306100  | -0.058958 |
| C  | -2.247230 | 2.269595  | -0.810582 |
| C  | 0.090087  | 2.878195  | -0.617064 |
| C  | -2.290012 | 2.800162  | -2.097330 |
| H  | -3.135043 | 1.822382  | -0.357177 |
| C  | 0.032879  | 3.421320  | -1.903329 |
| C  | -1.147431 | 3.384771  | -2.642515 |
| H  | -3.220842 | 2.765138  | -2.668353 |
| H  | 0.941512  | 3.850822  | -2.329980 |
| H  | -1.169877 | 3.809294  | -3.648352 |
| S  | 1.674925  | 2.935459  | 0.241216  |
| O  | 2.697117  | 2.949832  | -0.848140 |
| O  | 1.782944  | 1.656997  | 1.010147  |
| O  | 1.642931  | 4.151278  | 1.071283  |
| Cu | -1.635808 | -0.788799 | -0.194907 |
| N  | -1.060872 | 1.676614  | 1.209320  |
| N  | -0.981989 | 0.009589  | 2.606192  |
| C  | -1.487723 | -2.005156 | -1.888867 |
| C  | -0.451159 | -1.044194 | -1.888168 |
| C  | 0.384098  | -0.901484 | -0.781661 |
| H  | 1.034459  | -0.031816 | -0.676198 |
| H  | 0.603136  | -1.757984 | -0.134992 |
| H  | -0.496360 | -0.232229 | -2.626384 |
| P  | 3.633709  | -2.137023 | -0.635518 |
| O  | 5.009704  | -2.942387 | -0.236242 |
| O  | 3.938804  | -1.014901 | -1.608246 |
| O  | 3.348420  | -1.242228 | 0.758624  |
| O  | 2.569498  | -3.170028 | -0.822073 |
| Na | 3.534994  | 0.814495  | -0.368464 |
| C  | 6.199597  | -2.208426 | -0.056259 |
| H  | 6.998058  | -2.914479 | 0.207921  |
| H  | 6.499032  | -1.673949 | -0.972034 |
| H  | 6.114672  | -1.470836 | 0.760977  |
| C  | 2.891597  | -1.885151 | 1.924371  |
| H  | 2.461309  | -1.127164 | 2.594454  |
| H  | 2.123845  | -2.641988 | 1.694312  |
| H  | 3.714009  | -2.390508 | 2.459611  |
| C  | -0.972319 | -1.333304 | 3.117596  |
| H  | -1.323202 | -2.908815 | -1.283183 |
| C  | -2.495516 | -2.103147 | -2.972398 |
| H  | -1.170809 | 1.207828  | 4.344269  |
| H  | 0.485841  | 1.028043  | 3.721934  |
| H  | -2.747904 | -1.120664 | -3.395432 |
| H  | -3.418929 | -2.588515 | -2.631802 |
| H  | -2.099274 | -2.720653 | -3.795489 |
| H  | -1.795148 | -1.502922 | 3.828579  |
| H  | -0.025063 | -1.539289 | 3.636965  |
| H  | -1.073230 | -2.038588 | 2.283562  |
| H  | 0.078604  | 3.006432  | 2.422062  |
| H  | -1.663236 | 2.945852  | 2.780270  |
| H  | -4.261792 | 0.125740  | -1.524930 |
| H  | -6.638208 | -0.423538 | -1.181692 |
| C  | -4.527871 | -0.607003 | -0.754513 |
| C  | -5.878224 | -0.921165 | -0.572129 |
| C  | -3.534366 | -1.225117 | 0.015522  |
| C  | -6.255468 | -1.871216 | 0.377639  |
| H  | -7.310208 | -2.121425 | 0.517909  |

|   |           |           |          |
|---|-----------|-----------|----------|
| C | -3.925445 | -2.180835 | 0.962605 |
| C | -5.274828 | -2.504219 | 1.141292 |
| H | -5.558339 | -3.256642 | 1.883105 |
| H | -3.180264 | -2.698534 | 1.575885 |

64

Scheme\_S15\_ts(cc)\_Ph / electronic energy: -4032.54422109 a.u. / lowest freq: -187.76 cm<sup>-1</sup>

|    |           |           |           |
|----|-----------|-----------|-----------|
| C  | -1.927452 | -2.208982 | 2.368736  |
| C  | -0.834238 | -1.767868 | 3.327446  |
| C  | -0.052368 | -1.485561 | 1.142609  |
| C  | -2.054117 | -2.047146 | -0.143550 |
| C  | -1.700099 | -3.037536 | -1.065942 |
| C  | -3.116533 | -1.176611 | -0.439641 |
| C  | -2.397891 | -3.178060 | -2.262004 |
| H  | -0.864133 | -3.699681 | -0.824860 |
| C  | -3.825709 | -1.337802 | -1.633162 |
| C  | -3.473777 | -2.334201 | -2.539998 |
| H  | -2.106339 | -3.954160 | -2.973278 |
| H  | -4.639456 | -0.645604 | -1.859968 |
| H  | -4.033417 | -2.442898 | -3.471559 |
| S  | -3.578833 | 0.214895  | 0.611756  |
| O  | -4.022423 | 1.269050  | -0.351575 |
| O  | -2.327839 | 0.661046  | 1.295963  |
| O  | -4.632957 | -0.281103 | 1.511999  |
| Cu | 0.981706  | -0.970243 | -0.494903 |
| N  | -1.316839 | -1.937865 | 1.058428  |
| N  | 0.277027  | -1.429996 | 2.433051  |
| C  | 2.114058  | -0.557865 | -2.218247 |
| C  | 0.726632  | -0.818686 | -2.564287 |
| C  | -0.310108 | -0.031424 | -2.136888 |
| H  | -1.346104 | -0.292947 | -2.363919 |
| H  | -0.107420 | 0.970100  | -1.737940 |
| H  | 0.498632  | -1.769289 | -3.066450 |
| P  | 0.744908  | 3.312213  | -0.552021 |
| O  | 1.475168  | 4.708220  | -0.111310 |
| O  | -0.522847 | 3.589346  | -1.334554 |
| O  | 0.105989  | 2.764143  | 0.894880  |
| O  | 1.826235  | 2.379739  | -1.012599 |
| Na | -2.083126 | 2.578997  | -0.049681 |
| C  | 0.673373  | 5.802403  | 0.283070  |
| H  | 1.340892  | 6.642980  | 0.512491  |
| H  | -0.019045 | 6.113059  | -0.514703 |
| H  | 0.084397  | 5.576668  | 1.187864  |
| C  | 0.880964  | 1.921287  | 1.715739  |
| H  | 0.267098  | 1.635182  | 2.580408  |
| H  | 1.184811  | 1.006960  | 1.173829  |
| H  | 1.793639  | 2.423771  | 2.080649  |
| C  | 1.547276  | -1.064918 | 2.994654  |
| H  | 2.318266  | 0.499719  | -1.999263 |
| C  | 3.161346  | -1.291857 | -2.992656 |
| H  | -0.530220 | -2.554707 | 4.033578  |
| H  | -1.109335 | -0.879322 | 3.919350  |
| H  | 2.987170  | -2.377143 | -3.005461 |
| H  | 4.174855  | -1.108007 | -2.616201 |
| H  | 3.131582  | -0.949911 | -4.040329 |
| H  | 2.011647  | -1.922544 | 3.507411  |
| H  | 1.426770  | -0.259252 | 3.734648  |
| H  | 2.224911  | -0.723417 | 2.206558  |
| H  | -2.863080 | -1.644602 | 2.483625  |
| H  | -2.167505 | -3.280660 | 2.448607  |
| H  | 2.792892  | -3.355322 | -0.419550 |
| H  | 4.926103  | -3.770519 | 0.764218  |
| C  | 3.383511  | -2.505438 | -0.060755 |
| C  | 4.589440  | -2.742353 | 0.603200  |
| C  | 2.934683  | -1.193980 | -0.244982 |
| C  | 5.363249  | -1.672331 | 1.058289  |
| H  | 6.310036  | -1.859783 | 1.571009  |
| C  | 3.720676  | -0.119248 | 0.184186  |
| C  | 4.928939  | -0.363079 | 0.842821  |
| H  | 5.538569  | 0.478970  | 1.182937  |
| H  | 3.383337  | 0.907970  | 0.002593  |

64

Scheme\_S15\_prod\_Ph / electronic energy: -4032.60724620 a.u. / lowest freq: 18.71 cm<sup>-1</sup>

|   |           |           |           |
|---|-----------|-----------|-----------|
| C | -2.595653 | -1.912760 | 2.262221  |
| C | -1.501718 | -1.683227 | 3.298153  |
| C | -0.516853 | -1.716508 | 1.182001  |
| C | -2.430265 | -1.803607 | -0.286488 |
| C | -2.119835 | -2.827624 | -1.191021 |
| C | -3.238417 | -0.734128 | -0.709931 |
| C | -2.624519 | -2.811788 | -2.487882 |
| H | -1.478599 | -3.644629 | -0.850109 |
| C | -3.754260 | -0.735399 | -2.009562 |
| C | -3.456425 | -1.768175 | -2.894590 |
| H | -2.373973 | -3.620220 | -3.178433 |

|    |           |           |           |
|----|-----------|-----------|-----------|
| H  | -4.368957 | 0.108457  | -2.329428 |
| H  | -3.864056 | -1.749142 | -3.907546 |
| S  | -3.591210 | 0.703309  | 0.321864  |
| O  | -3.757856 | 1.825232  | -0.651514 |
| O  | -2.365114 | 0.933947  | 1.144554  |
| O  | -4.800045 | 0.373519  | 1.095524  |
| Cu | 0.654824  | -1.434015 | -0.368325 |
| N  | -1.843422 | -1.844309 | 1.000052  |
| N  | -0.278633 | -1.672783 | 2.490716  |
| C  | 2.912011  | -0.607031 | -1.982563 |
| C  | 1.476163  | -0.978508 | -2.267240 |
| C  | 0.415984  | -0.146997 | -2.029689 |
| H  | -0.593279 | -0.397790 | -2.372871 |
| H  | 0.597443  | 0.873733  | -1.670856 |
| H  | 1.298918  | -1.931352 | -2.789650 |
| P  | 1.218837  | 3.384839  | -0.460681 |
| O  | 2.009483  | 4.533509  | 0.402860  |
| O  | -0.011365 | 3.965346  | -1.128036 |
| O  | 0.493715  | 2.479971  | 0.751907  |
| O  | 2.266312  | 2.571490  | -1.154595 |
| Na | -1.668278 | 2.792324  | -0.126836 |
| C  | 1.256421  | 5.495960  | 1.108473  |
| H  | 1.959376  | 6.190692  | 1.586591  |
| H  | 0.596062  | 6.072697  | 0.441835  |
| H  | 0.637636  | 5.038396  | 1.899297  |
| C  | 1.235013  | 1.517159  | 1.457902  |
| H  | 0.648807  | 1.215358  | 2.337095  |
| H  | 1.426828  | 0.616187  | 0.841137  |
| H  | 2.205334  | 1.909796  | 1.806942  |
| C  | 1.017214  | -1.534463 | 3.093384  |
| H  | 2.942066  | 0.484288  | -1.829571 |
| C  | 3.824760  | -0.982264 | -3.143873 |
| H  | -1.455995 | -2.473562 | 4.061967  |
| H  | -1.600428 | -0.719397 | 3.824358  |
| H  | 3.816624  | -2.068124 | -3.326157 |
| H  | 4.864112  | -0.687143 | -2.942510 |
| H  | 3.509775  | -0.484741 | -4.072252 |
| H  | 1.320966  | -2.453260 | 3.620442  |
| H  | 1.021409  | -0.711460 | 3.823657  |
| H  | 1.757656  | -1.318096 | 2.311798  |
| H  | -3.388782 | -1.154288 | 2.290348  |
| H  | -3.070830 | -2.902076 | 2.353371  |
| H  | 2.502861  | -3.193243 | -1.116324 |
| H  | 3.273946  | -4.231836 | 0.998278  |
| C  | 3.062654  | -2.591643 | -0.390788 |
| C  | 3.510791  | -3.184717 | 0.793126  |
| C  | 3.364057  | -1.249099 | -0.684088 |
| C  | 4.262016  | -2.444331 | 1.704672  |
| H  | 4.615563  | -2.906414 | 2.629586  |
| C  | 4.098902  | -0.511812 | 0.254956  |
| C  | 4.547416  | -1.103996 | 1.435254  |
| H  | 5.125179  | -0.513729 | 2.151275  |
| H  | 4.312892  | 0.541523  | 0.049217  |

77

Scheme\_S16\_NHC(S)-1b-Cu-Me / electronic energy: -3689.54478686 a.u. / lowest freq: 10.62 cm<sup>-1</sup>

|    |           |           |           |
|----|-----------|-----------|-----------|
| C  | -1.027231 | 0.617857  | 1.003016  |
| H  | -1.517373 | 1.575263  | 0.785640  |
| C  | 0.492375  | 0.801526  | 1.214823  |
| H  | 0.776024  | 0.440439  | 2.218907  |
| C  | 0.125734  | -0.719119 | -0.574209 |
| C  | -2.292162 | -0.773763 | -0.714304 |
| C  | -2.416994 | -2.168482 | -0.816570 |
| C  | -3.354511 | 0.044581  | -1.143305 |
| C  | -3.571883 | -2.751439 | -1.327378 |
| H  | -1.575620 | -2.788040 | -0.490815 |
| C  | -4.515709 | -0.558004 | -1.637260 |
| C  | -4.634567 | -1.942195 | -1.727823 |
| H  | -3.642859 | -3.839341 | -1.399234 |
| H  | -5.320055 | 0.094836  | -1.982106 |
| H  | -5.551198 | -2.386700 | -2.123077 |
| C  | 2.451865  | -0.373545 | 0.062649  |
| C  | 3.153089  | 0.276763  | -0.972753 |
| C  | 3.097165  | -1.248463 | 0.964369  |
| C  | 4.528978  | 0.035300  | -1.082701 |
| C  | 4.474008  | -1.444911 | 0.820703  |
| C  | 5.186037  | -0.806978 | -0.192825 |
| H  | 6.261278  | -0.976117 | -0.293144 |
| S  | -3.273208 | 1.858371  | -1.206392 |
| O  | -4.353892 | 2.245698  | -2.137195 |
| O  | -1.907331 | 2.141098  | -1.717588 |
| O  | -3.498951 | 2.326875  | 0.185815  |
| Cu | 0.551932  | -2.115565 | -1.837428 |
| C  | -1.717255 | -0.022145 | 2.182407  |

|   |           |           |           |
|---|-----------|-----------|-----------|
| C | -2.582976 | 0.725256  | 2.986408  |
| C | -1.474764 | -1.363831 | 2.508124  |
| C | -3.180220 | 0.147771  | 4.108181  |
| H | -2.795099 | 1.762564  | 2.715185  |
| C | -2.071053 | -1.941823 | 3.626535  |
| H | -0.818279 | -1.962883 | 1.868166  |
| C | -2.923811 | -1.184076 | 4.432801  |
| H | -3.856406 | 0.741557  | 4.728568  |
| H | -1.873780 | -2.989523 | 3.868473  |
| H | -3.394608 | -1.636213 | 5.309356  |
| N | -1.080674 | -0.257706 | -0.191988 |
| N | 1.050727  | -0.145268 | 0.212962  |
| H | 4.996513  | -2.120904 | 1.502180  |
| C | 2.301359  | -2.035093 | 1.986758  |
| C | 2.469744  | 1.178684  | -1.980244 |
| H | 5.093343  | 0.520551  | -1.884032 |
| H | 1.425668  | -1.428925 | 2.268048  |
| H | 1.446962  | 1.376642  | -1.622246 |
| C | 3.174924  | 2.521963  | -2.113540 |
| H | 4.170064  | 2.422055  | -2.574717 |
| H | 2.593631  | 3.206053  | -2.749530 |
| H | 3.310528  | 3.010488  | -1.136785 |
| C | 2.347956  | 0.477543  | -3.329469 |
| H | 1.814414  | 1.108458  | -4.056011 |
| H | 3.337369  | 0.242805  | -3.753959 |
| H | 1.791055  | -0.471214 | -3.236468 |
| C | 3.067442  | -2.332321 | 3.266012  |
| H | 3.489081  | -1.421106 | 3.716292  |
| H | 2.403742  | -2.792294 | 4.012604  |
| H | 3.896387  | -3.037722 | 3.103664  |
| C | 1.769935  | -3.317757 | 1.350138  |
| H | 1.113017  | -3.866365 | 2.043009  |
| H | 1.199766  | -3.111304 | 0.426144  |
| H | 2.596340  | -3.991468 | 1.072666  |
| C | 1.041775  | 2.202366  | 1.077406  |
| C | 2.184259  | 2.548770  | 1.811655  |
| C | 0.463929  | 3.157868  | 0.230300  |
| C | 2.735702  | 3.826208  | 1.716970  |
| H | 2.638627  | 1.805876  | 2.476187  |
| C | 1.012669  | 4.437862  | 0.143274  |
| H | -0.417493 | 2.902045  | -0.370346 |
| C | 2.144917  | 4.777850  | 0.885262  |
| H | 3.622896  | 4.080889  | 2.302275  |
| H | 0.548728  | 5.177382  | -0.514821 |
| H | 2.567261  | 5.783591  | 0.815202  |
| C | 1.025992  | -3.608127 | -3.005889 |
| H | 0.580390  | -3.529158 | -4.017342 |
| H | 0.707206  | -4.596401 | -2.619440 |
| H | 2.118455  | -3.693484 | -3.172996 |

68

Scheme\_S16\_NHC(S)-1a-Cu-Me / electronic energy: -3571.70652471 a.u. / lowest freq: 23.10 cm<sup>-1</sup>

|    |           |           |           |
|----|-----------|-----------|-----------|
| C  | 0.893453  | -1.167985 | 0.397443  |
| H  | 1.263926  | -1.644011 | -0.521490 |
| C  | -0.629351 | -1.357776 | 0.548382  |
| H  | -0.859197 | -1.774910 | 1.543375  |
| C  | -0.155805 | 0.961272  | 0.333670  |
| C  | 2.256915  | 0.970666  | 0.133406  |
| C  | 2.585066  | 1.925368  | 1.105940  |
| C  | 3.149244  | 0.725903  | -0.926661 |
| C  | 3.793609  | 2.612852  | 1.053631  |
| H  | 1.864661  | 2.114635  | 1.906553  |
| C  | 4.366136  | 1.413613  | -0.957160 |
| C  | 4.696985  | 2.342797  | 0.025716  |
| H  | 4.030754  | 3.352814  | 1.821622  |
| H  | 5.037429  | 1.226342  | -1.797568 |
| H  | 5.653261  | 2.869349  | -0.021954 |
| C  | -2.517918 | 0.353790  | 0.466605  |
| C  | -3.079680 | 0.904652  | -0.706043 |
| C  | -3.318067 | 0.075773  | 1.591927  |
| C  | -4.454642 | 1.159451  | -0.720881 |
| C  | -4.690429 | 0.339468  | 1.517914  |
| C  | -5.282155 | 0.877367  | 0.371610  |
| C  | -6.755839 | 1.124383  | 0.302133  |
| S  | 2.750034  | -0.327590 | -2.353181 |
| O  | 3.703729  | 0.095632  | -3.399433 |
| O  | 1.332733  | -0.001082 | -2.655654 |
| O  | 2.952275  | -1.733288 | -1.910375 |
| Cu | -0.362402 | 2.869053  | 0.202567  |
| C  | 1.723808  | -1.657274 | 1.558934  |
| C  | 2.880106  | -2.409651 | 1.324918  |
| C  | 1.389073  | -1.318835 | 2.877372  |
| C  | 3.677127  | -2.830610 | 2.391023  |
| H  | 3.155050  | -2.642158 | 0.291892  |

|   |           |           |           |
|---|-----------|-----------|-----------|
| C | 2.184579  | -1.737444 | 3.941574  |
| H | 0.499216  | -0.710830 | 3.071679  |
| C | 3.330801  | -2.498652 | 3.700194  |
| H | 4.577562  | -3.418702 | 2.195651  |
| H | 1.911929  | -1.466383 | 4.964679  |
| H | 3.955843  | -2.827429 | 4.534362  |
| N | 1.012932  | 0.305191  | 0.254432  |
| N | -1.128693 | 0.045473  | 0.501114  |
| H | -5.311906 | 0.131930  | 2.395203  |
| C | -2.730203 | -0.467642 | 2.854938  |
| C | -2.249600 | 1.233978  | -1.904327 |
| H | -4.896191 | 1.586600  | -1.627155 |
| C | -1.306379 | -2.224240 | -0.485181 |
| C | -2.375311 | -3.042228 | -0.099025 |
| C | -0.939346 | -2.177228 | -1.837180 |
| C | -3.072697 | -3.798149 | -1.041054 |
| H | -2.661665 | -3.086350 | 0.956905  |
| C | -1.636466 | -2.935690 | -2.777450 |
| H | -0.107984 | -1.538326 | -2.159917 |
| C | -2.704597 | -3.744557 | -2.385280 |
| H | -3.904169 | -4.432296 | -0.723261 |
| H | -1.341513 | -2.892585 | -3.829211 |
| H | -3.247724 | -4.335742 | -3.127102 |
| C | -0.556835 | 4.806109  | 0.080523  |
| H | -0.018015 | 5.236725  | -0.786606 |
| H | -0.161520 | 5.342688  | 0.965792  |
| H | -1.606388 | 5.145009  | -0.026374 |
| H | -3.371131 | -0.244533 | 3.717709  |
| H | -1.734249 | -0.049024 | 3.056939  |
| H | -2.614684 | -1.563806 | 2.826818  |
| H | -2.867871 | 1.301643  | -2.809295 |
| H | -1.451484 | 0.499782  | -2.083550 |
| H | -1.738259 | 2.206095  | -1.778643 |
| H | -6.993003 | 2.038305  | -0.259881 |
| H | -7.205866 | 1.212135  | 1.299975  |
| H | -7.276732 | 0.300308  | -0.211483 |

67

Scheme\_S16\_NHC(S)-Zc-Cu-Me / electronic energy: -3458.67482873 a.u. / lowest freq: 25.35 cm<sup>-1</sup>

|    |           |           |           |
|----|-----------|-----------|-----------|
| C  | -1.047494 | 0.774857  | -1.211854 |
| H  | -1.801837 | 0.358505  | -1.889115 |
| C  | 0.358166  | 0.622971  | -1.792221 |
| H  | 0.760828  | 1.558811  | -2.207541 |
| C  | 0.347694  | -0.295320 | 0.364449  |
| C  | -2.031261 | -0.364940 | 0.846554  |
| C  | -1.939167 | -0.039831 | 2.209108  |
| C  | -3.187909 | -1.010245 | 0.367542  |
| C  | -2.974063 | -0.338621 | 3.089143  |
| H  | -1.025199 | 0.446802  | 2.564038  |
| C  | -4.224670 | -1.289330 | 1.263410  |
| C  | -4.129862 | -0.956703 | 2.612177  |
| H  | -2.878922 | -0.076549 | 4.145587  |
| H  | -5.104885 | -1.807268 | 0.876610  |
| H  | -4.953220 | -1.190943 | 3.291373  |
| C  | 2.531504  | -0.068439 | -0.698518 |
| C  | 2.995522  | -1.351751 | -1.048209 |
| C  | 3.413455  | 1.000797  | -0.434024 |
| C  | 4.381615  | -1.547510 | -1.114503 |
| C  | 4.787268  | 0.759020  | -0.527474 |
| C  | 5.268061  | -0.505445 | -0.863709 |
| H  | 6.345447  | -0.679312 | -0.926241 |
| S  | -3.404004 | -1.576705 | -1.347902 |
| O  | -4.445742 | -2.622906 | -1.261326 |
| O  | -2.071696 | -2.079580 | -1.761598 |
| O  | -3.844704 | -0.368054 | -2.095531 |
| Cu | 1.071880  | -0.981872 | 2.013097  |
| C  | -1.422554 | 2.196539  | -0.860844 |
| C  | -2.341292 | 2.891688  | -1.654682 |
| C  | -0.844140 | 2.851898  | 0.234898  |
| C  | -2.660368 | 4.220801  | -1.373402 |
| H  | -2.814270 | 2.376503  | -2.495325 |
| C  | -1.159692 | 4.180000  | 0.516072  |
| H  | -0.144844 | 2.312113  | 0.881831  |
| C  | -2.067455 | 4.869631  | -0.290271 |
| H  | -3.382832 | 4.749963  | -2.000119 |
| H  | -0.699877 | 4.677540  | 1.374224  |
| H  | -2.320050 | 5.909198  | -0.066961 |
| N  | -0.932572 | -0.059392 | 0.010338  |
| N  | 1.127817  | 0.174828  | -0.627854 |
| H  | 5.493846  | 1.567014  | -0.322012 |
| C  | 2.871422  | 2.335503  | 0.035056  |
| C  | 2.055720  | -2.511869 | -1.312924 |
| H  | 4.769869  | -2.537695 | -1.369848 |
| H  | 1.894765  | 2.483960  | -0.457165 |

|   |          |           |           |
|---|----------|-----------|-----------|
| H | 1.027333 | -2.120553 | -1.365356 |
| C | 2.347420 | -3.194531 | -2.643342 |
| H | 3.336050 | -3.678980 | -2.652924 |
| H | 1.603556 | -3.978214 | -2.848163 |
| H | 2.318365 | -2.484976 | -3.483684 |
| C | 2.097442 | -3.504789 | -0.155828 |
| H | 1.381205 | -4.325287 | -0.311542 |
| H | 3.097854 | -3.952085 | -0.041491 |
| H | 1.840132 | -3.011977 | 0.798203  |
| C | 3.748944 | 3.522307  | -0.327893 |
| H | 3.982725 | 3.553749  | -1.402237 |
| H | 3.242529 | 4.464762  | -0.072937 |
| H | 4.703064 | 3.519164  | 0.220811  |
| C | 2.615781 | 2.284112  | 1.540425  |
| H | 2.138432 | 3.209515  | 1.898416  |
| H | 1.969037 | 1.433074  | 1.821124  |
| H | 3.560427 | 2.162360  | 2.094354  |
| H | 0.396883 | -0.144415 | -2.585476 |
| C | 1.876126 | -1.567981 | 3.694548  |
| H | 1.605913 | -2.609279 | 3.960441  |
| H | 1.586207 | -0.955230 | 4.571036  |
| H | 2.984163 | -1.549320 | 3.674835  |

58

Scheme\_S16\_NHC(S)-2a-Cu-Me / electronic energy: -3340.83727707 a.u. / lowest freq: 29.36 cm<sup>-1</sup>

|    |           |           |           |
|----|-----------|-----------|-----------|
| C  | -0.894777 | 1.133640  | -0.988969 |
| H  | -1.514160 | 0.790233  | -1.826529 |
| C  | 0.557141  | 1.324709  | -1.418686 |
| H  | 0.854262  | 2.383014  | -1.469357 |
| C  | 0.525599  | -0.202860 | 0.362002  |
| C  | -1.847518 | -0.617417 | 0.611821  |
| C  | -1.908822 | -0.626470 | 2.013555  |
| C  | -2.848972 | -1.272574 | -0.129150 |
| C  | -2.955212 | -1.255611 | 2.679674  |
| H  | -1.110071 | -0.126885 | 2.568769  |
| C  | -3.900516 | -1.889601 | 0.556121  |
| C  | -3.964813 | -1.880105 | 1.946806  |
| H  | -2.984303 | -1.249561 | 3.771852  |
| H  | -4.657762 | -2.410237 | -0.034016 |
| H  | -4.795701 | -2.372567 | 2.457769  |
| C  | 2.724332  | 0.421716  | -0.480131 |
| C  | 3.244764  | -0.788343 | -0.982908 |
| C  | 3.573529  | 1.476070  | -0.095675 |
| C  | 4.634699  | -0.913993 | -1.088891 |
| C  | 4.954823  | 1.301882  | -0.227849 |
| C  | 5.508002  | 0.115035  | -0.721396 |
| C  | 6.990181  | -0.062271 | -0.821966 |
| S  | -2.829057 | -1.441557 | -1.939681 |
| O  | -3.670300 | -2.628012 | -2.205025 |
| O  | -1.401480 | -1.613032 | -2.300176 |
| O  | -3.422292 | -0.175678 | -2.454007 |
| Cu | 1.127782  | -1.476059 | 1.670872  |
| C  | -1.569801 | 2.312315  | -0.328469 |
| C  | -2.945236 | 2.503388  | -0.510127 |
| C  | -0.870993 | 3.177539  | 0.523358  |
| C  | -3.605303 | 3.548139  | 0.138295  |
| H  | -3.487860 | 1.813072  | -1.164831 |
| C  | -1.529837 | 4.221970  | 1.169857  |
| H  | 0.201020  | 3.029806  | 0.684901  |
| C  | -2.899955 | 4.410735  | 0.977500  |
| H  | -4.678693 | 3.688883  | -0.013225 |
| H  | -0.971610 | 4.891545  | 1.829364  |
| H  | -3.416684 | 5.229886  | 1.484034  |
| N  | -0.748605 | 0.024986  | -0.002275 |
| N  | 1.312136  | 0.595347  | -0.389185 |
| H  | 5.618395  | 2.118921  | 0.073531  |
| C  | 3.016994  | 2.739830  | 0.476598  |
| C  | 2.356303  | -1.925392 | -1.373151 |
| H  | 5.046942  | -1.848711 | -1.482900 |
| H  | 0.753236  | 0.876546  | -2.406903 |
| C  | 1.787221  | -2.754171 | 2.989494  |
| H  | 1.217276  | -3.704176 | 3.006821  |
| H  | 1.748629  | -2.371677 | 4.028764  |
| H  | 2.842876  | -3.046086 | 2.820968  |
| H  | 3.816116  | 3.412311  | 0.812720  |
| H  | 2.365552  | 2.535680  | 1.340288  |
| H  | 2.406463  | 3.299355  | -0.249363 |
| H  | 2.876221  | -2.627541 | -2.037912 |
| H  | 1.430553  | -1.599349 | -1.868402 |
| H  | 2.033668  | -2.491142 | -0.480228 |
| H  | 7.268383  | -0.725180 | -1.652544 |
| H  | 7.401884  | -0.517705 | 0.093092  |
| H  | 7.511450  | 0.894655  | -0.959444 |

75

Scheme\_S16\_NHC(S)-4d-Cu-Me / electronic energy: -3838.24574694 a.u. / lowest freq: 17.43 cm<sup>-1</sup>

|    |           |           |           |
|----|-----------|-----------|-----------|
| C  | 1.202147  | 0.879319  | 0.721863  |
| H  | 1.535859  | 0.339191  | 1.621257  |
| C  | -0.319991 | 1.127421  | 0.776627  |
| H  | -0.554176 | 2.137419  | 0.392064  |
| C  | 0.149394  | -0.498677 | -0.890648 |
| C  | 2.567493  | -0.560378 | -0.879467 |
| C  | 3.004063  | -0.221081 | -2.164558 |
| C  | 3.345346  | -1.418802 | -0.082314 |
| C  | 4.211203  | -0.707508 | -2.658304 |
| H  | 2.374642  | 0.435939  | -2.770598 |
| C  | 4.559309  | -1.892704 | -0.586601 |
| C  | 4.997775  | -1.537540 | -1.860068 |
| H  | 4.537228  | -0.433789 | -3.664344 |
| H  | 5.142655  | -2.574029 | 0.036445  |
| H  | 5.949331  | -1.922545 | -2.234642 |
| S  | 2.818120  | -2.021076 | 1.548131  |
| O  | 3.630048  | -3.234036 | 1.773189  |
| O  | 1.362521  | -2.287354 | 1.393740  |
| O  | 3.118518  | -0.919989 | 2.500219  |
| Cu | -0.208030 | -1.895264 | -2.160118 |
| C  | 2.050036  | 2.113123  | 0.559158  |
| C  | 3.119644  | 2.354792  | 1.427305  |
| C  | 1.801555  | 3.017602  | -0.481448 |
| C  | 3.913705  | 3.492502  | 1.268687  |
| H  | 3.329596  | 1.630503  | 2.219801  |
| C  | 2.591979  | 4.152355  | -0.641334 |
| H  | 0.979539  | 2.822689  | -1.176960 |
| C  | 3.650224  | 4.394677  | 0.238335  |
| H  | 4.745889  | 3.672618  | 1.953969  |
| H  | 2.382887  | 4.850899  | -1.456364 |
| H  | 4.272056  | 5.285148  | 0.115836  |
| N  | 1.323284  | -0.035090 | -0.439747 |
| N  | -0.824975 | 0.122879  | -0.194676 |
| C  | -0.951295 | 0.977674  | 2.135759  |
| C  | -1.821125 | 1.963251  | 2.614205  |
| C  | -0.711303 | -0.161830 | 2.917980  |
| C  | -2.447406 | 1.819195  | 3.852939  |
| H  | -2.005545 | 2.854860  | 2.006089  |
| C  | -1.340732 | -0.305370 | 4.153105  |
| H  | -0.024149 | -0.936113 | 2.555543  |
| C  | -2.210032 | 0.681671  | 4.623529  |
| H  | -3.122649 | 2.598141  | 4.216113  |
| H  | -1.148829 | -1.196823 | 4.755796  |
| H  | -2.700632 | 0.563612  | 5.593132  |
| H  | -4.048276 | -5.071152 | 0.696893  |
| H  | -1.630183 | -4.546511 | 1.046021  |
| C  | -3.675745 | -4.063848 | 0.494589  |
| C  | -2.308361 | -3.768766 | 0.686172  |
| H  | -5.603129 | -3.288561 | -0.067155 |
| C  | -4.538690 | -3.078426 | 0.068682  |
| C  | -1.813761 | -2.508067 | 0.425315  |
| C  | -4.069209 | -1.766337 | -0.198592 |
| C  | -2.673682 | -1.477238 | -0.043629 |
| H  | -6.013959 | -0.948075 | -0.695810 |
| C  | -4.947312 | -0.728740 | -0.599708 |
| C  | -2.203894 | -0.165566 | -0.367975 |
| C  | -4.468612 | 0.528600  | -0.875916 |
| C  | -3.081706 | 0.825975  | -0.802746 |
| H  | -5.152139 | 1.314779  | -1.207426 |
| C  | -2.615590 | 2.161552  | -1.239381 |
| H  | -3.994750 | 3.241731  | 0.026012  |
| H  | -1.152699 | 1.391722  | -2.633867 |
| C  | -3.202889 | 3.327869  | -0.723961 |
| C  | -1.603505 | 2.291722  | -2.204830 |
| C  | -2.770854 | 4.587303  | -1.137406 |
| C  | -1.184792 | 3.551158  | -2.629523 |
| H  | -3.229081 | 5.483704  | -0.712013 |
| C  | -1.757095 | 4.703938  | -2.088999 |
| H  | -1.419546 | 5.690766  | -2.415133 |
| H  | -0.752534 | -2.306081 | 0.588611  |
| H  | -0.400004 | 3.632177  | -3.386363 |
| C  | -0.673606 | -3.339577 | -3.386963 |
| H  | -0.608140 | -3.088185 | -4.463796 |
| H  | -1.715831 | -3.683802 | -3.225644 |
| H  | -0.043452 | -4.241310 | -3.255639 |

83

Scheme\_S16\_NHC(S)-3b-Cu-Me / electronic energy: -3768.10570677 a.u. / lowest freq: 16.21 cm<sup>-1</sup>

|   |          |           |          |
|---|----------|-----------|----------|
| O | 4.482316 | -1.068620 | 3.128914 |
| O | 2.121622 | -0.592381 | 2.513430 |
| S | 3.557997 | -0.340245 | 2.235148 |
| O | 3.893765 | 1.100975  | 2.089060 |
| H | 5.699007 | -1.904104 | 1.252705 |

|    |           |           |           |
|----|-----------|-----------|-----------|
| H  | 0.494681  | 0.961769  | 2.456924  |
| C  | -0.072596 | 1.886064  | 2.294101  |
| C  | 4.997515  | -1.837093 | 0.418512  |
| C  | 3.835186  | -1.080950 | 0.598479  |
| H  | 2.119262  | 1.447221  | 0.824366  |
| H  | 6.153223  | -3.105276 | -0.887389 |
| H  | 3.939415  | 2.679929  | 0.202867  |
| C  | 5.238731  | -2.518426 | -0.771564 |
| C  | -0.301446 | 2.336592  | 0.986779  |
| C  | 2.907723  | -1.003002 | -0.455269 |
| N  | 1.708760  | -0.248873 | -0.358729 |
| C  | 1.695901  | 1.218388  | -0.165159 |
| C  | 0.495017  | -0.813022 | -0.409648 |
| C  | 0.183431  | 1.530900  | -0.193146 |
| C  | 3.653908  | 2.646136  | -0.852174 |
| Cu | 0.261611  | -2.699877 | -0.745807 |
| N  | -0.417041 | 0.176365  | -0.261389 |
| C  | 4.302199  | -2.463058 | -1.804010 |
| C  | -1.810306 | -0.032052 | -0.254143 |
| C  | 3.145622  | -1.706547 | -1.643135 |
| C  | 2.513675  | 1.923118  | -1.217043 |
| C  | 4.422424  | 3.289774  | -1.823897 |
| H  | -0.073617 | 2.074742  | -1.119656 |
| H  | -0.079060 | -5.255147 | -0.378538 |
| H  | 1.179283  | -4.960305 | -1.577945 |
| H  | 4.471388  | -3.005588 | -2.737046 |
| C  | 0.195447  | -4.592560 | -1.223389 |
| H  | 2.398652  | -1.648913 | -2.439214 |
| C  | 2.166081  | 1.837119  | -2.572501 |
| C  | 4.064218  | 3.208190  | -3.168909 |
| H  | 1.286480  | 1.256115  | -2.870106 |
| H  | -0.522061 | -4.836656 | -2.031813 |
| H  | -2.262023 | 1.931060  | -1.021102 |
| C  | 2.934878  | 2.475441  | -3.542640 |
| H  | 4.667299  | 3.710695  | -3.929392 |
| H  | 2.654358  | 2.400529  | -4.596340 |
| C  | -2.678722 | 0.985468  | -0.676914 |
| C  | -2.331587 | -1.252137 | 0.180229  |
| H  | -1.639144 | -2.020441 | 0.537408  |
| H  | 5.309843  | 3.854746  | -1.527506 |
| H  | -1.593783 | 4.399036  | 4.029305  |
| H  | -0.352247 | 2.270372  | 4.395759  |
| C  | -1.230020 | 3.822573  | 3.174897  |
| C  | -0.537086 | 2.627103  | 3.379257  |
| H  | -1.982493 | 5.221099  | 1.707397  |
| C  | -1.448605 | 4.282341  | 1.876627  |
| C  | -0.984284 | 3.540864  | 0.789764  |
| H  | -1.152316 | 3.899991  | -0.230864 |
| C  | -4.060959 | 0.789058  | -0.669173 |
| C  | -3.711420 | -1.489385 | 0.167689  |
| C  | -4.556944 | -0.457223 | -0.250630 |
| H  | -5.637670 | -0.612765 | -0.244095 |
| C  | -4.224432 | -2.859613 | 0.617244  |
| C  | -5.041969 | 1.891076  | -1.078035 |
| C  | -4.328156 | 3.138738  | -1.591211 |
| C  | -5.875900 | 2.281384  | 0.148214  |
| C  | -5.973193 | 1.378174  | -2.181427 |
| H  | -5.236469 | 2.654753  | 0.963036  |
| H  | -6.452247 | 1.431258  | 0.542019  |
| H  | -6.593355 | 3.077589  | -0.104608 |
| H  | -3.690373 | 3.598229  | -0.821529 |
| H  | -5.064857 | 3.897408  | -1.893662 |
| H  | -3.699071 | 2.927524  | -2.469159 |
| H  | -5.411230 | 1.081500  | -3.079983 |
| H  | -6.686309 | 2.161616  | -2.480724 |
| H  | -6.564183 | 0.508899  | -1.859277 |
| C  | -5.745452 | -2.956840 | 0.548651  |
| C  | -3.781495 | -3.119101 | 2.061498  |
| C  | -3.620325 | -3.933839 | -0.294761 |
| H  | -3.938979 | -3.800213 | -1.340161 |
| H  | -3.934575 | -4.940127 | 0.023075  |
| H  | -2.519707 | -3.909739 | -0.283238 |
| H  | -4.180651 | -2.358261 | 2.749340  |
| H  | -2.686812 | -3.117393 | 2.165285  |
| H  | -4.139341 | -4.101049 | 2.407434  |
| H  | -6.239791 | -2.226778 | 1.207097  |
| H  | -6.075046 | -3.956623 | 0.867813  |
| H  | -6.126141 | -2.800492 | -0.471807 |

115

Scheme\_S16\_NHC(S)-3a-Cu-Me / electronic energy: -4386.96712820 a.u. / lowest freq: 11.53 cm<sup>-1</sup>

|   |           |          |          |
|---|-----------|----------|----------|
| O | -6.503553 | 2.293524 | 1.607291 |
| O | -4.023791 | 2.136750 | 1.681141 |
| S | -5.313053 | 1.423798 | 1.506178 |

|    |           |           |           |
|----|-----------|-----------|-----------|
| O  | -5.423890 | 0.187008  | 2.327521  |
| H  | -7.285793 | 1.602058  | -0.491180 |
| H  | -2.458845 | 1.003625  | 2.646337  |
| C  | -1.608765 | 0.515564  | 3.139885  |
| C  | -6.430885 | 1.146203  | -0.994488 |
| C  | -5.289012 | 0.887181  | -0.230701 |
| H  | -3.558005 | -0.715427 | 1.767647  |
| H  | -7.373843 | 1.083431  | -2.933396 |
| H  | -5.445051 | -2.009231 | 1.417980  |
| C  | -6.469599 | 0.868780  | -2.358632 |
| C  | -1.026644 | -0.629878 | 2.581842  |
| C  | -4.164393 | 0.319442  | -0.858603 |
| N  | -2.979779 | -0.013639 | -0.153336 |
| C  | -2.969752 | -1.067533 | 0.908611  |
| C  | -1.750179 | 0.284422  | -0.613550 |
| C  | -1.473354 | -1.173183 | 1.246463  |
| C  | -4.911658 | -2.658123 | 0.716283  |
| Cu | -1.256018 | 1.109936  | -2.287217 |
| N  | -0.863327 | -0.381590 | 0.149316  |
| C  | -5.345918 | 0.330722  | -2.984450 |
| C  | 0.533974  | -0.216448 | 0.028231  |
| C  | -4.207739 | 0.051404  | -2.234717 |
| C  | -3.597847 | -2.328149 | 0.364122  |
| C  | -5.531117 | -3.778979 | 0.161078  |
| H  | -1.130694 | -2.218193 | 1.162774  |
| H  | 0.206965  | 1.665327  | -4.400146 |
| H  | -1.311063 | 2.572106  | -4.434059 |
| H  | -5.355633 | 0.113647  | -4.055234 |
| C  | -0.867744 | 1.600945  | -4.137677 |
| H  | -3.320948 | -0.383561 | -2.705741 |
| C  | -2.920817 | -3.130446 | -0.565108 |
| C  | -4.847112 | -4.577657 | -0.754887 |
| H  | -1.901471 | -2.871945 | -0.871482 |
| H  | -1.295787 | 0.862176  | -4.845547 |
| H  | 0.918675  | -2.332442 | -0.171708 |
| C  | -3.539523 | -4.249109 | -1.119262 |
| H  | -5.332723 | -5.454710 | -1.190170 |
| H  | -3.000278 | -4.866164 | -1.842482 |
| C  | 1.358630  | -1.331016 | -0.134472 |
| C  | 1.081017  | 1.067725  | 0.077107  |
| H  | 0.418202  | 1.924677  | 0.228052  |
| H  | -6.557035 | -4.027754 | 0.444488  |
| H  | 0.385982  | 0.875128  | 5.887476  |
| H  | -1.567309 | 1.934559  | 4.760291  |
| C  | -0.009740 | 0.450555  | 4.961093  |
| C  | -1.102970 | 1.044435  | 4.327727  |
| H  | 1.438296  | -1.153669 | 4.892237  |
| C  | 0.579833  | -0.684312 | 4.403606  |
| C  | 0.068249  | -1.222321 | 3.223055  |
| H  | 0.522891  | -2.117199 | 2.786026  |
| C  | 2.738333  | -1.163428 | -0.293232 |
| C  | 2.460623  | 1.251394  | -0.050298 |
| C  | 3.275497  | 0.128334  | -0.246781 |
| H  | 4.356525  | 0.262125  | -0.363166 |
| C  | 3.054282  | 2.613341  | 0.045410  |
| C  | 2.873595  | 3.537467  | -1.009952 |
| C  | 3.791855  | 2.976025  | 1.197921  |
| C  | 3.465161  | 4.802955  | -0.905112 |
| C  | 4.354443  | 4.256800  | 1.262293  |
| C  | 4.201961  | 5.163454  | 0.218232  |
| H  | 3.347006  | 5.518584  | -1.724160 |
| H  | 4.914623  | 4.551347  | 2.154783  |
| H  | 4.653910  | 6.156775  | 0.282866  |
| C  | 2.110146  | 3.193604  | -2.278015 |
| H  | 1.618649  | 2.215132  | -2.142689 |
| C  | 1.002857  | 4.199019  | -2.567106 |
| H  | 1.390670  | 5.223093  | -2.683240 |
| H  | 0.477622  | 3.945162  | -3.498657 |
| H  | 0.251354  | 4.218024  | -1.762853 |
| C  | 3.065150  | 3.053288  | -3.458953 |
| H  | 3.847187  | 2.304110  | -3.260565 |
| H  | 2.528710  | 2.739771  | -4.367453 |
| H  | 3.572972  | 4.003674  | -3.688995 |
| C  | 3.932771  | 2.059886  | 2.402796  |
| H  | 3.530986  | 1.069100  | 2.136124  |
| C  | 5.385892  | 1.863540  | 2.815888  |
| H  | 5.998802  | 1.468395  | 1.991912  |
| H  | 5.851170  | 2.804327  | 3.148334  |
| H  | 5.462148  | 1.156861  | 3.655636  |
| C  | 3.094286  | 2.578990  | 3.566711  |
| H  | 2.031668  | 2.665890  | 3.294075  |
| H  | 3.162452  | 1.905176  | 4.434221  |
| H  | 3.432686  | 3.573987  | 3.897049  |

|   |          |           |           |
|---|----------|-----------|-----------|
| H | 2.716149 | -3.727028 | 3.677066  |
| H | 4.665208 | -2.049920 | 3.772611  |
| H | 5.685313 | -3.162328 | 2.839861  |
| H | 3.676053 | -4.865323 | 2.725390  |
| C | 3.017896 | -3.985728 | 2.651128  |
| C | 4.937884 | -2.357954 | 2.751331  |
| H | 2.114068 | -4.300701 | 2.108022  |
| H | 5.433509 | -1.502407 | 2.268352  |
| C | 3.711273 | -2.813059 | 1.967977  |
| H | 3.001836 | -1.969417 | 1.962062  |
| H | 5.269116 | -4.840309 | 1.085366  |
| C | 4.071411 | -3.131717 | 0.527840  |
| C | 4.903374 | -4.225374 | 0.257360  |
| H | 5.924274 | -5.396654 | -1.240670 |
| C | 5.275808 | -4.538181 | -1.046642 |
| C | 3.617899 | -2.338670 | -0.549787 |
| C | 4.818001 | -3.756220 | -2.102943 |
| C | 3.987867 | -2.650683 | -1.878156 |
| H | 5.104786 | -4.011501 | -3.127716 |
| C | 3.486874 | -1.852133 | -3.069582 |
| H | 3.076512 | -3.560289 | -4.371322 |
| C | 2.555445 | -2.692916 | -3.936081 |
| H | 2.895730 | -1.001425 | -2.693225 |
| C | 4.635024 | -1.273407 | -3.887552 |
| H | 5.295202 | -0.641508 | -3.274551 |
| H | 5.258940 | -2.061985 | -4.336602 |
| H | 4.256439 | -0.651661 | -4.712600 |
| H | 1.700898 | -3.078047 | -3.359659 |
| H | 2.149994 | -2.101158 | -4.770316 |

81

Scheme\_S16\_NHC(S)-4a-Cu-Me / electronic energy: -3841.84975758 a.u. / lowest freq: 15.72 cm<sup>-1</sup>

|    |           |           |           |
|----|-----------|-----------|-----------|
| C  | 1.511890  | 0.854342  | 0.631564  |
| H  | 1.832400  | 0.489314  | 1.618756  |
| C  | 0.037256  | 1.320609  | 0.667854  |
| H  | -0.048288 | 2.347839  | 0.273855  |
| C  | 0.233353  | -0.544554 | -0.795338 |
| C  | 2.600413  | -1.024951 | -0.712549 |
| C  | 2.917886  | -1.027550 | -2.077372 |
| C  | 3.399642  | -1.752309 | 0.187410  |
| C  | 4.028494  | -1.719197 | -2.551022 |
| H  | 2.269880  | -0.473910 | -2.762038 |
| C  | 4.520429  | -2.429948 | -0.300920 |
| C  | 4.843790  | -2.410572 | -1.655309 |
| H  | 4.259369  | -1.709983 | -3.618746 |
| H  | 5.118128  | -3.004572 | 0.409384  |
| H  | 5.723217  | -2.951390 | -2.013365 |
| S  | 2.970224  | -1.989232 | 1.936792  |
| O  | 3.799427  | -3.134135 | 2.367739  |
| O  | 1.512969  | -2.273891 | 1.908825  |
| O  | 3.318509  | -0.719734 | 2.628852  |
| Cu | -0.204426 | -1.977078 | -2.004541 |
| C  | 2.503069  | 1.885117  | 0.154027  |
| C  | 3.671203  | 2.128126  | 0.883838  |
| C  | 2.293428  | 2.578036  | -1.045718 |
| C  | 4.603208  | 3.064590  | 0.432386  |
| H  | 3.846850  | 1.558561  | 1.800949  |
| C  | 3.222095  | 3.512395  | -1.497115 |
| H  | 1.392173  | 2.374910  | -1.633518 |
| C  | 4.379622  | 3.760747  | -0.754936 |
| H  | 5.512074  | 3.248438  | 1.011059  |
| H  | 3.044603  | 4.048671  | -2.433231 |
| H  | 5.109224  | 4.493955  | -1.108010 |
| N  | 1.453908  | -0.297654 | -0.302205 |
| N  | -0.612950 | 0.378189  | -0.287250 |
| C  | -2.019665 | 0.229172  | -0.385714 |
| C  | -2.873955 | 1.316872  | -0.665795 |
| C  | -2.552680 | -1.041194 | -0.154699 |
| C  | -4.253463 | 1.062825  | -0.648985 |
| C  | -3.926077 | -1.300263 | -0.193509 |
| C  | -4.774052 | -0.210653 | -0.427858 |
| H  | -5.857312 | -0.343862 | -0.452126 |
| H  | -1.847418 | -1.843545 | 0.080694  |
| H  | 0.054203  | -0.745573 | 2.463706  |
| H  | -1.144334 | -0.862162 | 4.633886  |
| C  | -0.544178 | 0.108235  | 2.806779  |
| C  | -1.210243 | 0.046236  | 4.029300  |
| C  | -0.619844 | 1.269340  | 2.024156  |
| C  | -1.953980 | 1.137068  | 4.486169  |
| H  | -2.474994 | 1.083182  | 5.445511  |
| C  | -1.357590 | 2.361537  | 2.491319  |
| C  | -2.021516 | 2.298327  | 3.717514  |
| H  | -1.407531 | 3.271939  | 1.885647  |
| H  | -2.592836 | 3.160058  | 4.072187  |

|   |           |           |           |
|---|-----------|-----------|-----------|
| H | -4.936708 | 1.889249  | -0.863850 |
| C | -2.384143 | 2.665792  | -1.021887 |
| C | -1.370240 | 2.839959  | -1.978842 |
| C | -2.956320 | 3.810858  | -0.443681 |
| C | -0.932853 | 4.115191  | -2.331250 |
| H | -0.929567 | 1.961681  | -2.459088 |
| C | -2.516094 | 5.086083  | -0.793832 |
| H | -3.741036 | 3.692821  | 0.309519  |
| C | -1.499583 | 5.243719  | -1.736773 |
| H | -1.152392 | 6.242993  | -2.010302 |
| C | -4.414809 | -2.729086 | 0.037624  |
| H | -2.966808 | 5.963118  | -0.322435 |
| H | -0.144359 | 4.227776  | -3.080318 |
| C | -0.567515 | -3.371289 | -3.323451 |
| H | -0.596689 | -4.391301 | -2.891637 |
| H | 0.204870  | -3.410489 | -4.117463 |
| H | -1.533113 | -3.249370 | -3.853331 |
| C | -5.935193 | -2.830139 | -0.031803 |
| C | -3.951546 | -3.204265 | 1.419894  |
| C | -3.807038 | -3.635243 | -1.040071 |
| H | -4.143356 | -3.342245 | -2.046587 |
| H | -4.102633 | -4.683697 | -0.881107 |
| H | -2.706388 | -3.596842 | -1.041643 |
| H | -6.427622 | -2.217805 | 0.738506  |
| H | -6.253255 | -3.870880 | 0.128149  |
| H | -6.327453 | -2.517050 | -1.010939 |
| H | -4.352061 | -2.565946 | 2.222315  |
| H | -2.855551 | -3.203205 | 1.512624  |
| H | -4.293651 | -4.233134 | 1.610401  |

97

Scheme\_S16\_NHC(S)-4b-Cu-Me / electronic energy: -4151.28099913 a.u. / lowest freq: 14.36 cm<sup>-1</sup>

|    |           |           |           |
|----|-----------|-----------|-----------|
| C  | 2.446663  | 0.493192  | 0.739120  |
| H  | 2.529104  | 0.189538  | 1.792903  |
| C  | 1.243546  | 1.440850  | 0.527964  |
| H  | 1.571041  | 2.365014  | 0.020537  |
| C  | 0.891517  | -0.560278 | -0.711897 |
| C  | 2.909396  | -1.812939 | -0.248609 |
| C  | 3.310349  | -2.128500 | -1.554144 |
| C  | 3.333085  | -2.620972 | 0.822071  |
| C  | 4.139539  | -3.217646 | -1.803789 |
| H  | 2.948675  | -1.499656 | -2.372603 |
| C  | 4.177750  | -3.703003 | 0.557084  |
| C  | 4.588192  | -4.000210 | -0.740120 |
| H  | 4.438918  | -3.448522 | -2.828807 |
| H  | 4.480430  | -4.331050 | 1.397461  |
| H  | 5.244878  | -4.854605 | -0.921198 |
| S  | 2.730002  | -2.426655 | 2.525845  |
| O  | 3.046524  | -3.715092 | 3.176341  |
| O  | 1.276414  | -2.170564 | 2.363831  |
| O  | 3.476472  | -1.278148 | 3.104867  |
| Cu | 0.187372  | -1.821622 | -1.983104 |
| C  | 3.777468  | 1.040166  | 0.286927  |
| C  | 4.886824  | 0.994946  | 1.137351  |
| C  | 3.931706  | 1.559391  | -1.005462 |
| C  | 6.123660  | 1.481805  | 0.709486  |
| H  | 4.770730  | 0.554198  | 2.131334  |
| C  | 5.164816  | 2.044376  | -1.433687 |
| H  | 3.072663  | 1.577113  | -1.684192 |
| C  | 6.265140  | 2.009783  | -0.573272 |
| H  | 6.983505  | 1.443235  | 1.383147  |
| H  | 5.270544  | 2.448747  | -2.443964 |
| H  | 7.234007  | 2.389349  | -0.907505 |
| N  | 2.061721  | -0.690321 | -0.070307 |
| N  | 0.389861  | 0.655876  | -0.410428 |
| C  | -0.957548 | 1.003430  | -0.676787 |
| C  | -1.307827 | 2.264963  | -1.200762 |
| C  | -1.950816 | 0.080848  | -0.326461 |
| C  | -2.676836 | 2.566283  | -1.296507 |
| C  | -3.307705 | 0.375434  | -0.466353 |
| C  | -3.657427 | 1.648785  | -0.941149 |
| H  | -4.712907 | 1.914867  | -1.046515 |
| H  | -1.640625 | -0.879209 | 0.096085  |
| H  | 0.436034  | -0.188662 | 2.586657  |
| H  | -0.934591 | 0.453059  | 4.554652  |
| C  | 0.112913  | 0.852570  | 2.715129  |
| C  | -0.653710 | 1.214075  | 3.821793  |
| C  | 0.483225  | 1.822735  | 1.772952  |
| C  | -1.062494 | 2.538139  | 3.999959  |
| H  | -1.665268 | 2.813866  | 4.869279  |
| C  | 0.079143  | 3.148386  | 1.962047  |
| C  | -0.691248 | 3.507286  | 3.068807  |
| H  | 0.376613  | 3.906527  | 1.230698  |
| H  | -0.998006 | 4.547594  | 3.204756  |

|   |           |           |           |
|---|-----------|-----------|-----------|
| H | -2.970969 | 3.538665  | -1.700936 |
| C | -0.311434 | 3.244452  | -1.684900 |
| C | 0.744988  | 2.850696  | -2.523174 |
| C | -0.425489 | 4.604687  | -1.352880 |
| C | 1.664844  | 3.784052  | -2.996797 |
| H | 0.835641  | 1.800970  | -2.816139 |
| C | 0.498783  | 5.536505  | -1.821404 |
| H | -1.240230 | 4.928234  | -0.698385 |
| C | 1.551295  | 5.128996  | -2.641962 |
| H | 2.277960  | 5.858062  | -3.008414 |
| C | -4.354617 | -0.608871 | -0.072921 |
| C | -4.606231 | -1.744023 | -0.886110 |
| C | -5.092600 | -0.399125 | 1.113218  |
| C | -5.628270 | -2.622080 | -0.508807 |
| C | -6.112810 | -1.302011 | 1.444560  |
| C | -6.385470 | -2.400101 | 0.639516  |
| H | -5.841766 | -3.499290 | -1.123019 |
| H | -6.693517 | -1.143095 | 2.358276  |
| H | -7.182916 | -3.096604 | 0.911973  |
| C | -3.823444 | -1.982922 | -2.167774 |
| H | -2.765355 | -1.723232 | -1.970625 |
| C | -3.839198 | -3.430228 | -2.633810 |
| H | -4.841258 | -3.754261 | -2.955205 |
| H | -3.174393 | -3.558348 | -3.499155 |
| H | -3.499118 | -4.124084 | -1.850813 |
| C | -4.314723 | -1.065799 | -3.285571 |
| H | -4.269158 | -0.002931 | -3.008147 |
| H | -3.709915 | -1.194547 | -4.195846 |
| H | -5.360619 | -1.291846 | -3.548342 |
| C | -4.798685 | 0.744491  | 2.069039  |
| H | -3.919267 | 1.293066  | 1.693884  |
| C | -5.959657 | 1.729689  | 2.139526  |
| H | -6.211401 | 2.140540  | 1.150612  |
| H | -6.870317 | 1.253831  | 2.536678  |
| H | -5.721438 | 2.577043  | 2.799978  |
| C | -4.436771 | 0.221666  | 3.455162  |
| H | -3.583293 | -0.471178 | 3.417286  |
| H | -4.165343 | 1.048042  | 4.128738  |
| H | -5.276011 | -0.314496 | 3.924945  |
| H | 0.398863  | 6.587633  | -1.539285 |
| H | 2.476832  | 3.456817  | -3.651804 |
| C | -0.261756 | -3.072000 | -3.413328 |
| H | -0.748281 | -3.999310 | -3.053112 |
| H | 0.654899  | -3.408693 | -3.939150 |
| H | -0.924016 | -2.669147 | -4.205043 |

72

Scheme\_S16\_IPr-Cu-Me / electronic energy: -2840.46968028 a.u. / lowest freq: 29.99 cm<sup>-1</sup>

|    |           |           |           |
|----|-----------|-----------|-----------|
| C  | -0.778703 | 0.129035  | -2.421488 |
| H  | -1.349677 | -0.583931 | -3.033305 |
| C  | 0.719267  | -0.123617 | -2.432789 |
| H  | 1.279304  | 0.582621  | -3.062201 |
| C  | -0.012062 | 0.013884  | -0.204721 |
| C  | -2.439750 | 0.123787  | -0.517145 |
| C  | -2.921605 | 1.392777  | -0.142872 |
| C  | -3.251158 | -1.029825 | -0.465887 |
| C  | -4.252802 | 1.485585  | 0.285388  |
| C  | -2.042033 | 2.627611  | -0.134002 |
| C  | -4.574746 | -0.884598 | -0.040390 |
| C  | -5.073201 | 0.363763  | 0.328521  |
| H  | -4.649332 | 2.457308  | 0.592897  |
| H  | -5.224960 | -1.760962 | 0.014660  |
| H  | -6.110228 | 0.459001  | 0.660314  |
| C  | 2.406946  | -0.109040 | -0.547868 |
| C  | 2.885225  | -1.380164 | -0.176049 |
| C  | 3.222431  | 1.041582  | -0.496474 |
| C  | 4.215244  | -1.477030 | 0.254911  |
| C  | 4.545242  | 0.892021  | -0.070171 |
| C  | 5.038947  | -0.357712 | 0.300497  |
| H  | 6.074839  | -0.456040 | 0.634929  |
| C  | -2.659496 | -2.391444 | -0.768834 |
| Cu | 0.048146  | -0.003738 | 1.721656  |
| H  | -1.042716 | 1.145824  | -2.763717 |
| N  | -1.102341 | -0.012407 | -0.993852 |
| N  | 1.065533  | 0.033382  | -1.012676 |
| H  | 5.198153  | 1.766400  | -0.014551 |
| C  | 2.635106  | 2.405440  | -0.797037 |
| C  | 2.009674  | -2.618221 | -0.185474 |
| H  | 4.608020  | -2.450145 | 0.563231  |
| H  | 1.860125  | 2.267555  | -1.570887 |
| H  | 1.047452  | -2.353769 | -0.654637 |
| C  | 2.621171  | -3.748103 | -1.004938 |
| H  | 3.556315  | -4.120889 | -0.559547 |
| H  | 1.931846  | -4.603399 | -1.063975 |

|   |           |           |           |
|---|-----------|-----------|-----------|
| H | 2.849632  | -3.435530 | -2.034718 |
| C | 1.709588  | -3.065595 | 1.241912  |
| H | 1.071757  | -3.962003 | 1.255229  |
| H | 2.633538  | -3.312054 | 1.788551  |
| H | 1.189732  | -2.271267 | 1.806235  |
| C | 3.645741  | 3.406293  | -1.333744 |
| H | 4.187018  | 3.021754  | -2.210701 |
| H | 3.143261  | 4.335914  | -1.637115 |
| H | 4.394976  | 3.685793  | -0.577856 |
| C | 1.938789  | 2.945641  | 0.451730  |
| H | 1.411774  | 3.888522  | 0.239662  |
| H | 1.206720  | 2.226569  | 0.859610  |
| H | 2.670122  | 3.146446  | 1.250761  |
| H | 0.977044  | -1.144197 | -2.768546 |
| C | 0.178661  | -0.083472 | 3.671711  |
| H | -0.374636 | -0.943318 | 4.099530  |
| H | -0.207479 | 0.808690  | 4.202646  |
| H | 1.222265  | -0.205734 | 4.024733  |
| C | -1.948286 | -2.926838 | 0.473715  |
| H | -1.892729 | -2.251344 | -1.550568 |
| C | -3.670010 | -3.398468 | -1.294034 |
| H | -1.209321 | -2.207943 | 0.869001  |
| H | -1.425397 | -3.871258 | 0.258642  |
| H | -2.669658 | -3.123883 | 1.282676  |
| H | -4.410518 | -3.680304 | -0.530441 |
| H | -3.165592 | -4.326055 | -1.600302 |
| H | -4.221517 | -3.018340 | -2.166507 |
| C | -1.693545 | 3.008172  | 1.301989  |
| C | -2.670516 | 3.795495  | -0.883202 |
| H | -1.097213 | 2.379285  | -0.645573 |
| H | -3.585482 | 4.158881  | -0.390945 |
| H | -2.936026 | 3.527798  | -1.916753 |
| H | -1.974485 | 4.645972  | -0.930517 |
| H | -2.598460 | 3.236006  | 1.887327  |
| H | -1.046811 | 3.897626  | 1.336823  |
| H | -1.164944 | 2.184206  | 1.814052  |

54

Scheme\_S16\_SiMes-Cu-Me / electronic energy: -2604.79370496 a.u. / lowest freq: 24.92 cm<sup>-1</sup>

|    |           |           |           |
|----|-----------|-----------|-----------|
| C  | 0.757244  | -2.544436 | 0.115632  |
| H  | 1.314668  | -3.166011 | -0.597949 |
| C  | -0.741269 | -2.547801 | -0.130619 |
| H  | -1.295510 | -3.175256 | 0.580254  |
| C  | 0.002344  | -0.322763 | -0.003546 |
| C  | 2.426089  | -0.632672 | 0.033356  |
| C  | 2.863446  | 0.078584  | 1.170749  |
| C  | 3.290924  | -0.878060 | -1.049284 |
| C  | 4.180414  | 0.545508  | 1.189710  |
| C  | 1.955828  | 0.339506  | 2.329902  |
| C  | 4.604402  | -0.398872 | -0.973538 |
| C  | 5.070136  | 0.317175  | 0.132348  |
| H  | 4.526656  | 1.099477  | 2.068312  |
| H  | 5.278116  | -0.578748 | -1.817394 |
| C  | 6.477541  | 0.820023  | 0.198830  |
| C  | -2.419539 | -0.643676 | -0.038031 |
| C  | -2.863086 | 0.064321  | -1.171666 |
| C  | -3.279100 | -0.888719 | 1.052277  |
| C  | -4.182314 | 0.533488  | -1.182496 |
| C  | -4.589869 | -0.409020 | 0.985099  |
| C  | -5.062772 | 0.308446  | -0.120249 |
| C  | -6.470848 | 0.812161  | -0.155869 |
| C  | 2.826498  | -1.619371 | -2.262285 |
| Cu | -0.008128 | 1.604021  | -0.005897 |
| H  | 1.024417  | -2.885175 | 1.131275  |
| N  | 1.089743  | -1.118654 | -0.028104 |
| N  | -1.080981 | -1.124457 | 0.018802  |
| H  | -5.259202 | -0.587118 | 1.833181  |
| C  | -2.804828 | -1.629855 | 2.261675  |
| C  | -1.963339 | 0.324997  | -2.336858 |
| H  | -4.533624 | 1.087364  | -2.058957 |
| H  | -1.006601 | -2.885909 | -1.147619 |
| C  | -0.040987 | 3.556583  | -0.020025 |
| H  | 0.585789  | 4.000794  | -0.818477 |
| H  | 0.317238  | 4.016900  | 0.921849  |
| H  | -1.056389 | 3.970030  | -0.182158 |
| H  | 7.020698  | 0.648569  | -0.739454 |
| H  | 7.045491  | 0.327268  | 1.003022  |
| H  | 6.514409  | 1.897814  | 0.415327  |
| H  | 2.525527  | 0.620056  | 3.225408  |
| H  | 1.333717  | -0.533061 | 2.578238  |
| H  | 1.253411  | 1.163925  | 2.111071  |
| H  | 3.444191  | -1.378694 | -3.137023 |
| H  | 1.780078  | -1.389528 | -2.510301 |
| H  | 2.885895  | -2.711529 | -2.127592 |

|   |           |           |           |
|---|-----------|-----------|-----------|
| H | -2.538997 | 0.600195  | -3.230220 |
| H | -1.338359 | -0.545389 | -2.585586 |
| H | -1.263350 | 1.153285  | -2.124409 |
| H | -1.761224 | -1.387965 | 2.510215  |
| H | -2.849666 | -2.721948 | 2.121604  |
| H | -3.424963 | -1.401216 | 3.137804  |
| H | -6.671545 | 1.407377  | -1.055754 |
| H | -6.699640 | 1.440255  | 0.717892  |
| H | -7.198339 | -0.013845 | -0.137088 |

### 13 NMR Spectra



**Scheme 22a**

<sup>1</sup>H (400 MHz, CDCl<sub>3</sub>)





**Scheme 22a**

<sup>13</sup>C (100 MHz, CDCl<sub>3</sub>)





**Scheme 22a**

**<sup>1</sup>H (400 MHz, CDCl<sub>3</sub>)**





**Scheme 22a**

<sup>13</sup>C (100 MHz, CDCl<sub>3</sub>)





**Scheme 22a**  
**<sup>1</sup>H (400 MHz, CDCl<sub>3</sub>)**





**Scheme 22a**

$^{13}\text{C}$  (100 MHz,  $\text{CDCl}_3$ )





**Scheme 22a**

**<sup>1</sup>H (400 MHz, CDCl<sub>3</sub>)**





Scheme 22a

<sup>13</sup>C (100 MHz, CDCl<sub>3</sub>)





**Scheme 22b**  
<sup>1</sup>H (400 MHz, CDCl<sub>3</sub>)











**Scheme 49b**  
**<sup>1</sup>H (400 MHz, CDCl<sub>3</sub>)**





**Scheme 49b**  
<sup>13</sup>C (100 MHz, CDCl<sub>3</sub>)





**Scheme 49b**

**<sup>1</sup>H (400 MHz, CDCl<sub>3</sub>)**





**Scheme 49b**

$^{13}\text{C}$  (100 MHz,  $\text{CDCl}_3$ )





**Scheme 50**  
**<sup>1</sup>H (400 MHz, CDCl<sub>3</sub>)**





**Scheme 50**  
<sup>13</sup>C (100 MHz, CDCl<sub>3</sub>)





**Scheme 50**  
**<sup>1</sup>H (400 MHz, CDCl<sub>3</sub>)**

— CDCl<sub>3</sub>





**Scheme 75, S4-d<sub>2</sub>**  
<sup>1</sup>H (400 MHz, CDCl<sub>3</sub>)





**Scheme 75, S4-*d*<sub>2</sub>**  
<sup>13</sup>C (100 MHz, CDCl<sub>3</sub>)





**Scheme 32, S6-d<sub>2</sub>**

**<sup>1</sup>H (400 MHz, CDCl<sub>3</sub>)**





**Scheme 32, S6-d<sub>2</sub>**  
<sup>13</sup>C (100 MHz, CDCl<sub>3</sub>)





(S)-S8  
<sup>1</sup>H (400 MHz, CDCl<sub>3</sub>)





(S)-S8

$^{13}\text{C}$  (100 MHz,  $\text{CDCl}_3$ )





(*R*)-S8

<sup>1</sup>H (400 MHz, CDCl<sub>3</sub>)





**(R)-S8**  
<sup>13</sup>C (100 MHz, CDCl<sub>3</sub>)





**Scheme 78**  
**<sup>1</sup>H (400 MHz, CDCl<sub>3</sub>)**





S10

<sup>1</sup>H (400 MHz, CDCl<sub>3</sub>)





**S10**

$^{13}\text{C}$  (100 MHz,  $\text{CDCl}_3$ )







**Scheme 83, NHC(C)-1**  
 $^{13}\text{C}$  (100 MHz,  $\text{CDCl}_3$ )



## 14 References

---

- [1] (a) J. A. Dabrowski, F. Haeffner, A. H. Hoveyda, *Angew. Chem. Int. Ed.* **2013**, *52*, 7694–7699; (b) B. Jung, Hoveyda, A. H. *J. Am. Chem. Soc.* **2012**, *134*, 1490–1493.
- [2] C. Sun, B. Potter, J. P. Morken, *J. Am. Chem. Soc.* **2014**, *136*, 6534–6537.
- [3] F. Gao, A. H. Hoveyda, *J. Am. Chem. Soc.* **2010**, *132*, 10961–10963.
- [4] J. J. Van Veldhuizen, J. E. Campbell, R. E. Giudici, A. H. Hoveyda, *J. Am. Chem. Soc.* **2005**, *127*, 6877–6882.
- [5] (a) M. K. Brown, T. L. May, C. A. Baxter, A. H. Hoveyda, *Angew. Chem. Int. Ed.* **2007**, *46*, 1097–1100; (b) T. L. May, M. K. Brown, A. H. Hoveyda, *Angew. Chem. Int. Ed.* **2008**, *47*, 7358–7362; (c) K. Akiyama, F. Gao, A. H. Hoveyda, *Angew. Chem. Int. Ed.* **2010**, *49*, 419–423.
- [6] B. Jung, Hoveyda, A. H. *J. Am. Chem. Soc.* **2012**, *134*, 1490–1493.
- [7] Y. Sun, Y. Zhou, Y. Shi, J. del Pozo, S. Torker, A. H. Hoveyda, *J. Am. Chem. Soc.* **2019**, *141*, 12087–12099.
- [8] M. Y. Ngai, E. Skucas, M. J. Krische, *Org. Lett.* **2008**, *10*, 2705–2708.
- [9] Q. Zhang, S. F. Zhu, Y. Cai, L. X. Wang, Q. L. Zhou, *Science China Chemistry* **2010**, *9*, 1899–1906.
- [10] D. Müller, Tissot, M.; A. Alexakis, *Org. Lett.* **2011**, *13*, 3040–3043.
- [11] (a) Y. Zhou, Y. Shi, S. Torker, A. H. Hoveyda, *J. Am. Chem. Soc.* **2018**, *140*, 16842–16854; (b) A. Guzman-Martinez, A. H. Hoveyda, *J. Am. Chem. Soc.* **2010**, *132*, 10634–10637.
- [12] T. R. Hoye, C. S. Jeffrey, F. Shao, *Nature Protocols* **2007**, *2*, 2451–2458.
- [13] L. B. Delvos, D. J. Vyas, M. Oestreich, *Angew. Chem. Int. Ed.* **2013**, *52*, 4650–4653.
- [14] D. J. Vyas, M. Oestreich, *Chem. Commun.* **2010**, *46*, 568–570.
- [15] K. Zhao, T.-P. Loh, *Chem. Eur. J.* **2014**, *20*, 16764–16772.
- [16] C. J. Cramer, D. G. Truhlar, *Phys. Chem. Chem. Phys.* **2009**, *11*, 10757–10816.
- [17] M. J. Frisch, G. W. Trucks, H. B. Schlegel, G. E. Scuseria, M. A. Robb, J. R. Cheeseman, G. Scalmani, V. Barone, B. Mennucci, G. A. Petersson, H. Nakatsuji, M. Caricato, X. Li, H. P. Hratchian, A. F. Izmaylov, J. Bloino, G. Zheng, J. L. Sonnenberg, M. Hada, M. Ehara, K. Toyota, R. Fukuda, J. Hasegawa, M. Ishida, T. Nakajima, Y. Honda, O. Kitao, H. Nakai, T. Vreven, J. A. Montgomery, Jr., J. E. Peralta, F. Ogliaro, M. Bearpark, J. J. Heyd, E. Brothers, K. N. Kudin, V. N. Staroverov, R. Kobayashi, J. Normand, K. Raghavachari, A. Rendell, J. C. Burant, S. S. Iyengar, J. Tomasi, M. Cossi, N. Rega, J. M. Millam, M. Klene, J. E. Knox, J. B. Cross, V. Bakken, C. Adamo, J. Jaramillo, R. Gomperts, R. E. Stratmann, O. Yazyev, A. J. Austin, R. Cammi, C. Pomelli, J. W. Ochterski, R. L. Martin, K. Morokuma, V. G. Zakrzewski, G. A. Voth, P. Salvador, J. J. Dannenberg, S. Dapprich, A. D. Daniels, Ö. Farkas, J. B. Foresman, J. V. Ortiz, J. Cioslowski, D. J. Fox, *Gaussian 09, Revision D.01*, Gaussian, Inc., Wallingford CT, 2009.
- [18] Y. Zhao, D. G. Truhlar, *Acc. Chem. Res.* **2008**, *41*, 157–167.
- [19] F. Weigend, R. Ahlrichs, *Phys. Chem. Chem. Phys.* **2005**, *7*, 3297–3305.
- [20] F. Weigend, *Phys. Chem. Chem. Phys.*, **2006**, *8*, 1057–1065.
- [21] A. V. Marenich, C. J. Cramer, D. G. Truhlar, *J. Phys. Chem. B* **2009**, *113*, 6378–6396.
- [22] M. Page, J. W. McIver Jr., *J. Chem. Phys.* **1988**, *88*, 922–935.
- [23] M. Page, C. Doubleday Jr., J. W. McIver Jr., *J. Chem. Phys.* **1990**, *93*, 5634–5642.
- [24] R. Peverati, D. G. Truhlar, *Phil. Trans. R. Soc. A* **2014**, *372*, 20120476.

- 
- [25] H. S. Yu, X. He, S. L. Li, D. G. Truhlar, *Chem. Sci.* **2016**, *7*, 5032–5051.
- [26] S. Grimme, S. Ehrlich, L. Goerigk, *J. Comp. Chem.* **2011**, *32*, 1456–1465.
- [27] L. Goerigk, A. Hansen, C. Bauer, S. Ehrlich, A. Najibi, S. Grimme, *Phys. Chem. Chem. Phys.* **2017**, *19*, 32184–32215.
- [28] N. Mardirossian, M. Head-Gordon, *J. Chem. Theory Comput.* **2016**, *12*, 4303–4325.
- [29] N. Mardirossian, M. Head-Gordon, *Molecular Physics* **2017**, *115*, 2315–2372.
- [30] T. Weymuth, E. P. A. Couzijn, P. Chen, M. Reiher, *J. Chem. Theory Comput.* **2014**, *10*, 3092–3103.
- [31] B. Brauer, M. K. Kesharwani, S. Kozuch, J. M. Martin, *Phys. Chem. Chem. Phys.* **2018**, *18*, 20905–20925.
- [32] J. P. Wagner, P. R. Schreiner, *Angew. Chem. Int. Ed.* **2015**, *54*, 12274–12296.
- [33] S. Torker, D. Merki, P. Chen, *J. Am. Chem. Soc.* **2008**, *130*, 4808–4814.
- [34] Y. Minenkov, G. Occhipinti, A. Singstad, V. R. Jensen, *Dalton Trans.* **2012**, *41*, 5526–5541.
- [35] Y. Minenkov, G. Occhipinti, V. R. Jensen, *Organometallics* **2013**, *32*, 2099–2111.
- [36] R. K. M. Khan, S. Torker, A. H. Hoveyda, *J. Am. Chem. Soc.* **2014**, *136*, 14337–14340.
- [37] L. Yang, C. Adam, G. S. Nichol, S. L. Cockroft, *Nat. Chem.* **2013**, *5*, 1006–1010.
- [38] R. Pollice, M. Bot, I. J. Kobylanskii, I. Shenderovich, P. Chen, *J. Am. Chem. Soc.* **2017**, *139*, 13126–13140.
- [39] D. L. Lichtenberger, J. A. Gladysz, *Organometallics* **2014**, *33*, 835–835.
- [40] N. Yoshikai, E. Nakamura, *Chem. Rev.* **2012**, *112*, 2339–2372.
- [41] Y. Shi, B. Jung, S. Torker, A. H. Hoveyda, *J. Am. Chem. Soc.* **2015**, *137*, 8948–8964.
- [42] J. Lee, S. Torker, A. H. Hoveyda, *Angew. Chem., Int. Ed.* **2017**, *56*, 821–826.
- [43] Y. Zhou, Y. Shi, S. Torker, A. H. Hoveyda, *J. Am. Chem. Soc.* **2018**, *140*, 16842–16854.
- [44] F. Meng, X. Li, S. Torker, Y. Shi, X. Shen, A. H. Hoveyda, *Nature* **2016**, *537*, 387–393.
- [45] X. Li, F. Meng, S. Torker, Y. Shi, A. H. Hoveyda, *Angew. Chem., Int. Ed.* **2016**, *55*, 9997–10002.
- [46] Y. Huang, S. Torker, X. Li, J. del Pozo, A. H. Hoveyda, *Angew. Chem., Int. Ed.* **2018**, *58*, 2685–2691.
- [47] D. J. Nelson, S. P. Nolan, *Chem. Soc. Rev.* **2013**, *42*, 6723–6753.
- [48] L. Falivene, R. Credendino, A. Poater, A. Petta, L. Serra, R. Oliva, V. Scarano, L. Cavallo, *Organometallics* **2016**, *35*, 2286–2293.
